# Supplementary material for: Brominated Depsidones with Antibacterial Effects from a Deep-Sea-Derived Fungus Spiromastix sp.
Source: MDPI journal article supplement (doi:10.3390/md22020078), 2024-02-03
Supplement: s1 [file s1]

# *Supplementary data*

## Brominated Depsidones with Antibacterial Effects from a Deep-Sea-Derived Fungus *Spiromastix* sp.

**Zequan Huang<sup>1,2,†</sup>, Dong Liu<sup>1,†</sup>, Shang Chen<sup>1</sup>, Jinwei Ren<sup>3</sup>, Chenghai Gao<sup>2</sup>, Zhiyong Li<sup>4</sup>, Aili Fan<sup>1,\*</sup> and Wenhao Lin<sup>1,5,\*</sup>**

<sup>1</sup> State Key Laboratory of Natural and Biomimetic Drugs, School of Pharmaceutical Sciences, Peking University, Beijing 100191, China; hzq092914@163.com (Z.H.); liudong\_1982@126.com (D.L.); chenshang@bjmu.edu.cn (S.C.)

<sup>2</sup> Institute of Marine Drugs, Guangxi University of Chinese Medicine, Nanning 530200, China; gaoch@gxcmu.edu.cn

<sup>3</sup> State Key Laboratory of Mycology, Institute of Microbiology, Chinese Academy of Sciences, Beijing 100101, China; renjw@im.ac.cn

<sup>4</sup> State Key Laboratory of Microbial Metabolism, School of Life Sciences and Biotechnology, Shanghai Jiao Tong University, Shanghai 200240, China; zyli@sjtu.edu.cn

<sup>5</sup> Ningbo Institute of Marine Medicine, Peking University, Ningbo 315832 Zhejiang, China

\* Correspondence: fanaili@bjmu.edu.cn (A.F.); whlin@bjmu.edu.cn (W.L.)

† These authors contributed equally to this work.

## Table of Contents

|                                                                                                    |    |
|----------------------------------------------------------------------------------------------------|----|
| Table S1. $^1\text{H}$ and $^{13}\text{C}$ NMR data and key COSY and HMBC correlations of <b>1</b> | 6  |
| Figure S1. $^1\text{H}$ -NMR spectrum of <b>1</b> in DMSO- $d_6$ (500 MHz)                         | 7  |
| Figure S2. APT spectrum of <b>1</b> in DMSO- $d_6$ (125 MHz)                                       | 8  |
| Figure S3. HSQC spectrum of <b>1</b> in DMSO- $d_6$                                                | 9  |
| Figure S4. $^1\text{H}$ - $^1\text{H}$ COSY spectrum of <b>1</b> in DMSO- $d_6$                    | 10 |
| Figure S5. HMBC spectrum of <b>1</b> in DMSO- $d_6$                                                | 11 |
| Figure S6. HRESIMS spectrum of <b>1</b>                                                            | 12 |
| Figure S7. UV spectrum of <b>1</b>                                                                 | 13 |
| Figure S8. IR spectrum of <b>1</b>                                                                 | 14 |
| Table S2. $^1\text{H}$ and $^{13}\text{C}$ NMR data and key COSY and HMBC correlations of <b>2</b> | 15 |
| Figure S9. $^1\text{H}$ -NMR spectrum of <b>2</b> in DMSO- $d_6$ (500 MHz)                         | 16 |
| Figure S10. APT spectrum of <b>2</b> in DMSO- $d_6$ (125 MHz)                                      | 17 |
| Figure S11. HSQC spectrum of <b>2</b> in DMSO- $d_6$                                               | 18 |
| Figure S12. $^1\text{H}$ - $^1\text{H}$ COSY spectrum of <b>2</b> in DMSO- $d_6$                   | 19 |
| Figure S13. HMBC spectrum of <b>2</b> in DMSO- $d_6$                                               | 20 |
| Figure S14. HRESIMS spectrum of <b>2</b>                                                           | 21 |
| Figure S15. UV spectrum of <b>2</b>                                                                | 22 |
| Figure S16. IR spectrum of <b>2</b>                                                                | 23 |
| Table S3. $^1\text{H}$ and $^{13}\text{C}$ NMR data and key COSY and HMBC correlations of <b>3</b> | 24 |
| Figure S17. $^1\text{H}$ -NMR spectrum of <b>3</b> in DMSO- $d_6$ (500 MHz)                        | 25 |
| Figure S18. APT spectrum of <b>3</b> in DMSO- $d_6$ (125 MHz)                                      | 26 |
| Figure S19. HSQC spectrum of <b>3</b> in DMSO- $d_6$                                               | 27 |
| Figure S20. $^1\text{H}$ - $^1\text{H}$ COSY spectrum of <b>3</b> in DMSO- $d_6$                   | 28 |
| Figure S21. HMBC spectrum of <b>3</b> in DMSO- $d_6$                                               | 29 |
| Figure S22. HRESIMS spectrum of <b>3</b>                                                           | 30 |
| Figure S23. UV spectrum of <b>3</b>                                                                | 31 |
| Figure S24. IR spectrum of <b>3</b>                                                                | 32 |
| Table S4. $^1\text{H}$ and $^{13}\text{C}$ NMR data and key COSY and HMBC correlations of <b>4</b> | 33 |
| Figure S25. $^1\text{H}$ -NMR spectrum of <b>4</b> in DMSO- $d_6$ (500 MHz)                        | 34 |
| Figure S26. APT spectrum of <b>4</b> in DMSO- $d_6$ (125 MHz)                                      | 35 |
| Figure S27. HSQC spectrum of <b>4</b> in DMSO- $d_6$                                               | 36 |
| Figure S28. $^1\text{H}$ - $^1\text{H}$ COSY spectrum of <b>4</b> in DMSO- $d_6$                   | 37 |
| Figure S29. HMBC spectrum of <b>4</b> in DMSO- $d_6$                                               | 38 |
| Figure S30. HRESIMS spectrum of <b>4</b>                                                           | 39 |
| Figure S31. UV spectrum of <b>4</b>                                                                | 40 |
| Figure S32. IR spectrum of <b>4</b>                                                                | 41 |
| Table S5. $^1\text{H}$ and $^{13}\text{C}$ NMR data and key COSY and HMBC correlations of <b>5</b> | 42 |
| Figure S33. $^1\text{H}$ -NMR spectrum of <b>5</b> in DMSO- $d_6$ (500 MHz)                        | 43 |
| Figure S34. APT spectrum of <b>5</b> in DMSO- $d_6$ (125 MHz)                                      | 44 |
| Figure S35. HSQC spectrum of <b>5</b> in DMSO- $d_6$                                               | 45 |
| Figure S36. $^1\text{H}$ - $^1\text{H}$ COSY spectrum of <b>5</b> in DMSO- $d_6$                   | 46 |

|                                                                                                      |    |
|------------------------------------------------------------------------------------------------------|----|
| Figure S37. HMBC spectrum of <b>5</b> in DMSO- <i>d</i> <sub>6</sub>                                 | 47 |
| Figure S38. HRESIMS spectrum of <b>5</b>                                                             | 48 |
| Figure S39. UV spectrum of <b>5</b>                                                                  | 49 |
| Figure S40. IR spectrum of <b>5</b>                                                                  | 50 |
| Table S6. <sup>1</sup> H and <sup>13</sup> C NMR data and key COSY and HMBC correlations of <b>6</b> | 51 |
| Figure S41. <sup>1</sup> H-NMR spectrum of <b>6</b> in DMSO- <i>d</i> <sub>6</sub> (400 MHz)         | 52 |
| Figure S42. <sup>13</sup> C-NMR spectrum of <b>6</b> in DMSO- <i>d</i> <sub>6</sub> (100 MHz)        | 53 |
| Figure S43. HSQC spectrum of <b>6</b> in DMSO- <i>d</i> <sub>6</sub>                                 | 54 |
| Figure S44. <sup>1</sup> H- <sup>1</sup> H COSY spectrum of <b>6</b> in DMSO- <i>d</i> <sub>6</sub>  | 55 |
| Figure S45. HMBC spectrum of <b>6</b> in DMSO- <i>d</i> <sub>6</sub>                                 | 56 |
| Figure S46. HRESIMS spectrum of <b>6</b>                                                             | 57 |
| Figure S47. UV spectrum of <b>6</b>                                                                  | 58 |
| Figure S48. IR spectrum of <b>6</b>                                                                  | 59 |
| Figure S49. <sup>1</sup> H-NMR spectrum of <b>7</b> in DMSO- <i>d</i> <sub>6</sub> (500 MHz)         | 60 |
| Figure S50. APT spectrum of <b>7</b> in DMSO- <i>d</i> <sub>6</sub> (125 MHz)                        | 61 |
| Figure S51. HSQC spectrum of <b>7</b> in DMSO- <i>d</i> <sub>6</sub>                                 | 62 |
| Figure S52. <sup>1</sup> H- <sup>1</sup> H COSY spectrum of <b>7</b> in DMSO- <i>d</i> <sub>6</sub>  | 63 |
| Figure S53. HMBC spectrum of <b>7</b> in DMSO- <i>d</i> <sub>6</sub>                                 | 64 |
| Figure S54. HRESIMS spectrum of <b>7</b>                                                             | 65 |
| Figure S55. UV spectrum of <b>7</b>                                                                  | 66 |
| Figure S56. IR spectrum of <b>7</b>                                                                  | 67 |
| Table S7. <sup>1</sup> H and <sup>13</sup> C NMR data and key COSY and HMBC correlations of <b>7</b> | 68 |
| Figure S57. <sup>1</sup> H-NMR spectrum of <b>8</b> in DMSO- <i>d</i> <sub>6</sub> (500 MHz)         | 69 |
| Figure S58. APT spectrum of <b>8</b> in DMSO- <i>d</i> <sub>6</sub> (125 MHz)                        | 70 |
| Figure S59. HSQC spectrum of <b>8</b> in DMSO- <i>d</i> <sub>6</sub>                                 | 71 |
| Figure S60. <sup>1</sup> H- <sup>1</sup> H COSY spectrum of <b>8</b> in DMSO- <i>d</i> <sub>6</sub>  | 72 |
| Figure S61. HMBC spectrum of <b>8</b> in DMSO- <i>d</i> <sub>6</sub>                                 | 73 |
| Figure S62. HRESIMS spectrum of <b>8</b>                                                             | 74 |
| Figure S63. UV spectrum of <b>8</b>                                                                  | 75 |
| Figure S64. IR spectrum of <b>8</b>                                                                  | 76 |
| Table S8. <sup>1</sup> H and <sup>13</sup> C NMR data and key COSY and HMBC correlations of <b>8</b> | 77 |
| Figure S65. <sup>1</sup> H-NMR spectrum of <b>9</b> in DMSO- <i>d</i> <sub>6</sub> (400 MHz)         | 78 |
| Figure S66. <sup>13</sup> C-NMR spectrum of <b>9</b> in DMSO- <i>d</i> <sub>6</sub> (100 MHz)        | 79 |
| Figure S67. HSQC spectrum of <b>9</b> in DMSO- <i>d</i> <sub>6</sub>                                 | 80 |
| Figure S68. <sup>1</sup> H- <sup>1</sup> H COSY spectrum of <b>9</b> in DMSO- <i>d</i> <sub>6</sub>  | 81 |
| Figure S69. HMBC spectrum of <b>9</b> in DMSO- <i>d</i> <sub>6</sub>                                 | 82 |
| Figure S70. HRESIMS spectrum of <b>9</b>                                                             | 83 |
| Figure S71. UV spectrum of <b>9</b>                                                                  | 84 |
| Figure S72. IR spectrum of <b>9</b>                                                                  | 85 |
| Table S9. <sup>1</sup> H and <sup>13</sup> C NMR data and key COSY and HMBC correlations of <b>9</b> | 86 |
| Figure S73. <sup>1</sup> H-NMR spectrum of <b>10</b> in DMSO- <i>d</i> <sub>6</sub> (500 MHz)        | 87 |
| Figure S74. <sup>13</sup> C-NMR spectrum of <b>10</b> in DMSO- <i>d</i> <sub>6</sub> (125 MHz)       | 88 |

|                                                                                                        |     |
|--------------------------------------------------------------------------------------------------------|-----|
| Figure S75. HSQC spectrum of <b>10</b> in DMSO- <i>d</i> <sub>6</sub>                                  | 89  |
| Figure S76. <sup>1</sup> H- <sup>1</sup> H COSY spectrum of <b>10</b> in DMSO- <i>d</i> <sub>6</sub>   | 90  |
| Figure S77. HMBC spectrum of <b>10</b> in DMSO- <i>d</i> <sub>6</sub>                                  | 91  |
| Figure S78. HRESIMS spectrum of <b>10</b>                                                              | 92  |
| Figure S79. UV spectrum of <b>10</b>                                                                   | 93  |
| Figure S80. IR spectrum of <b>10</b>                                                                   | 94  |
| Table S10. <sup>1</sup> H and <sup>13</sup> C NMR data and key COSY and HMBC correlations of <b>10</b> | 95  |
| Figure S81. <sup>1</sup> H-NMR spectrum of <b>11</b> in DMSO- <i>d</i> <sub>6</sub> (600 MHz)          | 96  |
| Figure S82. <sup>13</sup> C-NMR spectrum of <b>11</b> in DMSO- <i>d</i> <sub>6</sub> (150 MHz)         | 97  |
| Figure S83. HSQC spectrum of <b>11</b> in DMSO- <i>d</i> <sub>6</sub>                                  | 98  |
| Figure S84. <sup>1</sup> H- <sup>1</sup> H COSY spectrum of <b>11</b> in DMSO- <i>d</i> <sub>6</sub>   | 99  |
| Figure S85. HMBC spectrum of <b>11</b> in DMSO- <i>d</i> <sub>6</sub>                                  | 100 |
| Figure S86. HRESIMS spectrum of <b>11</b>                                                              | 101 |
| Figure S87. UV spectrum of <b>11</b>                                                                   | 102 |
| Figure S88. IR spectrum of <b>11</b>                                                                   | 103 |
| Table S11. <sup>1</sup> H and <sup>13</sup> C NMR data and key COSY and HMBC correlations of <b>11</b> | 104 |
| Figure S89. <sup>1</sup> H-NMR spectrum of <b>12</b> in DMSO- <i>d</i> <sub>6</sub> (500 MHz)          | 105 |
| Figure S90. APT spectrum of <b>12</b> in DMSO- <i>d</i> <sub>6</sub> (125 MHz)                         | 106 |
| Figure S91. HSQC spectrum of <b>12</b> in DMSO- <i>d</i> <sub>6</sub>                                  | 107 |
| Figure S92. <sup>1</sup> H- <sup>1</sup> H COSY spectrum of <b>12</b> in DMSO- <i>d</i> <sub>6</sub>   | 108 |
| Figure S93. HMBC spectrum of <b>12</b> in DMSO- <i>d</i> <sub>6</sub>                                  | 109 |
| Figure S94. HRESIMS spectrum of <b>12</b>                                                              | 110 |
| Figure S95. UV spectrum of <b>12</b>                                                                   | 111 |
| Figure S96. IR spectrum of <b>12</b>                                                                   | 112 |
| Figure S97. <sup>1</sup> H-NMR spectrum of <b>13</b> in DMSO- <i>d</i> <sub>6</sub> (500 MHz)          | 113 |
| Figure S98. APT spectrum of <b>13</b> in DMSO- <i>d</i> <sub>6</sub> (125 MHz)                         | 114 |
| Figure S99. HSQC spectrum of <b>13</b> in DMSO- <i>d</i> <sub>6</sub>                                  | 115 |
| Figure S100. <sup>1</sup> H- <sup>1</sup> H COSY spectrum of <b>13</b> in DMSO- <i>d</i> <sub>6</sub>  | 116 |
| Figure S101. HMBC spectrum of <b>13</b> in DMSO- <i>d</i> <sub>6</sub>                                 | 117 |
| Figure S102. HRESIMS spectrum of <b>13</b>                                                             | 118 |
| Figure S103. UV spectrum of <b>13</b>                                                                  | 119 |
| Figure S104. IR spectrum of <b>13</b>                                                                  | 120 |
| Figure S105. <sup>1</sup> H-NMR spectrum of <b>14</b> in DMSO- <i>d</i> <sub>6</sub> (500 MHz)         | 121 |
| Figure S106. APT spectrum of <b>14</b> in DMSO- <i>d</i> <sub>6</sub> (125 MHz)                        | 122 |
| Figure S107. HSQC spectrum of <b>14</b> in DMSO- <i>d</i> <sub>6</sub>                                 | 123 |
| Figure S108. <sup>1</sup> H- <sup>1</sup> H COSY spectrum of <b>14</b> in DMSO- <i>d</i> <sub>6</sub>  | 124 |
| Figure S109. HMBC spectrum of <b>14</b> in DMSO- <i>d</i> <sub>6</sub>                                 | 125 |
| Figure S110. HRESIMS spectrum of <b>14</b>                                                             | 126 |
| Figure S111. UV spectrum of <b>14</b>                                                                  | 127 |
| Figure S112. IR spectrum of <b>14</b>                                                                  | 128 |
| Figure S113. <sup>1</sup> H-NMR spectrum of <b>15</b> in DMSO- <i>d</i> <sub>6</sub> (500 MHz)         | 129 |
| Figure S114. APT spectrum of <b>15</b> in DMSO- <i>d</i> <sub>6</sub> (125 MHz)                        | 130 |



|                                                                                                       |     |
|-------------------------------------------------------------------------------------------------------|-----|
| Figure S115. HSQC spectrum of <b>15</b> in DMSO- <i>d</i> <sub>6</sub>                                | 131 |
| Figure S116. <sup>1</sup> H- <sup>1</sup> H COSY spectrum of <b>15</b> in DMSO- <i>d</i> <sub>6</sub> | 132 |
| Figure S117. HMBC spectrum of <b>15</b> in DMSO- <i>d</i> <sub>6</sub>                                | 133 |
| Figure S118. HRESIMS spectrum of <b>15</b>                                                            | 134 |
| Figure S119. UV spectrum of <b>15</b>                                                                 | 135 |
| Figure S120. IR spectrum of <b>15</b>                                                                 | 136 |
| Figure S121. <sup>1</sup> H-NMR spectrum of <b>16</b> in DMSO- <i>d</i> <sub>6</sub> (500 MHz)        | 137 |
| Figure S122. <sup>13</sup> C-NMR spectrum of <b>16</b> in DMSO- <i>d</i> <sub>6</sub> (125 MHz)       | 138 |
| Figure S123. HSQC spectrum of <b>16</b> in DMSO- <i>d</i> <sub>6</sub>                                | 139 |
| Figure S124. <sup>1</sup> H- <sup>1</sup> H COSY spectrum of <b>16</b> in DMSO- <i>d</i> <sub>6</sub> | 140 |
| Figure S125. HMBC spectrum of <b>16</b> in DMSO- <i>d</i> <sub>6</sub>                                | 141 |
| Figure S126. HRESIMS spectrum of <b>16</b>                                                            | 142 |
| Figure S127. UV spectrum of <b>16</b>                                                                 | 143 |
| Figure S128. IR spectrum of <b>16</b>                                                                 | 144 |
| Table S12. Comparison of <sup>1</sup> H NMR data of <b>12-16</b> with spiromastixones P-T             | 145 |
| Table S13. Comparison of <sup>13</sup> C NMR data of <b>12-16</b> with spiromastixones P-T            | 146 |

Table S1.  $^1\text{H}$  and  $^{13}\text{C}$  NMR data and key COSY and HMBC correlations of 1

| No. | $\delta_{\text{H}}$ | $\delta_{\text{C}}$   | COSY                                   | HMBC                         |
|-----|---------------------|-----------------------|----------------------------------------|------------------------------|
| 1   |                     | 111.1, qC             |                                        |                              |
| 2   |                     | 161.7, qC             |                                        |                              |
| 3   | 6.80, s             | 105.3, CH             |                                        | C-1, C-2, C-4, C-5           |
| 4   |                     | 159.7, qC             |                                        |                              |
| 5   |                     | 113.6, qC             |                                        |                              |
| 6   |                     | 146.9, qC             |                                        |                              |
| 7   |                     | 162.9, qC             |                                        |                              |
| 8   | 2.81, t (7.9)       | 36.0, CH <sub>2</sub> | H <sub>2</sub> -9                      | C-1, C-5, C-6, C-9, C-10     |
| 9   | 1.54, m             | 23.0, CH <sub>2</sub> | H <sub>2</sub> -8, H <sub>3</sub> -10  | C-6, C-8, C-10               |
| 10  | 0.89, t (7.3)       | 14.3, CH <sub>3</sub> | H <sub>2</sub> -9                      | C-8, C-9                     |
| 1'  |                     | 141.3, C              |                                        |                              |
| 2'  |                     | 144.6, C              |                                        |                              |
| 3'  | 6.50, d (2.7)       | 105.5, CH             | H-5'                                   | C-1', C-2', C-4', C-5'       |
| 4'  |                     | 155.2, C              |                                        |                              |
| 5'  | 6.47, d (2.7)       | 113.2, CH             | H-3'                                   | C-1', C-3', C-4', C-7'       |
| 6'  |                     | 135.8, C              |                                        |                              |
| 7'  | 2.65, t (7.8)       | 31.4, CH <sub>2</sub> | H <sub>2</sub> -8'                     | C-1', C-5', C-6', C-8', C-9' |
| 8'  | 1.57, m             | 23.7, CH <sub>2</sub> | H <sub>2</sub> -7', H <sub>3</sub> -9' | C-6', C-7', C-9'             |
| 9'  | 0.97, t (7.3)       | 14.4, CH <sub>3</sub> | H <sub>2</sub> -8'                     | C-7', C-8'                   |

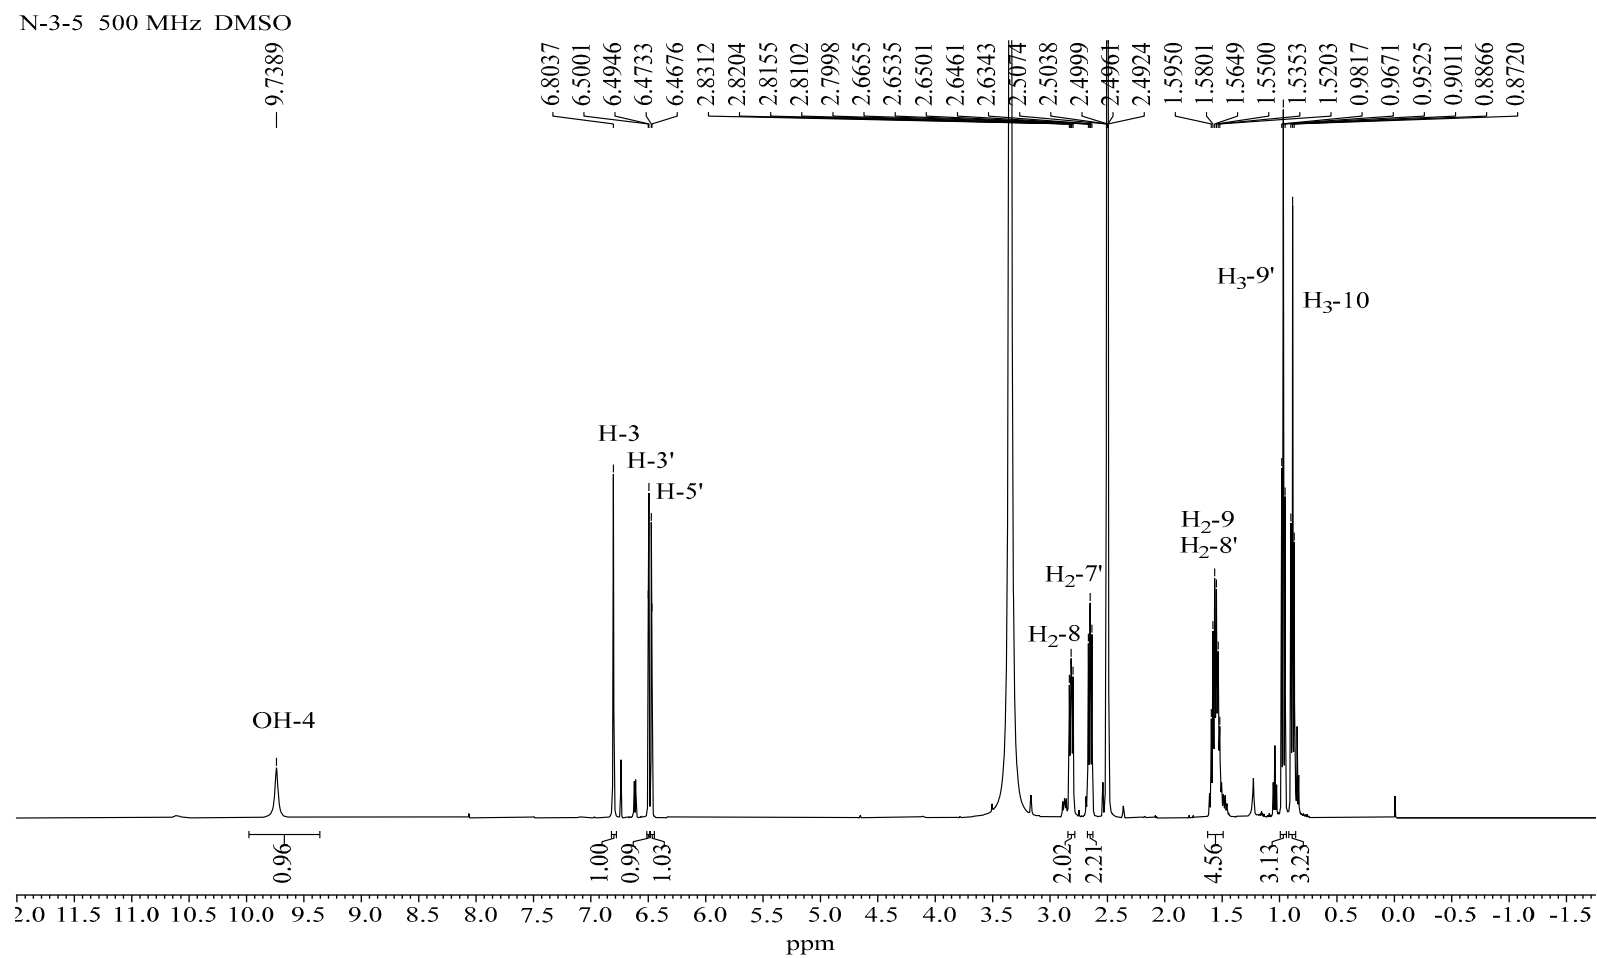

**Figure S1.**  $^1\text{H}$ -NMR spectrum of **1** in  $\text{DMSO-}d_6$  (500 MHz)

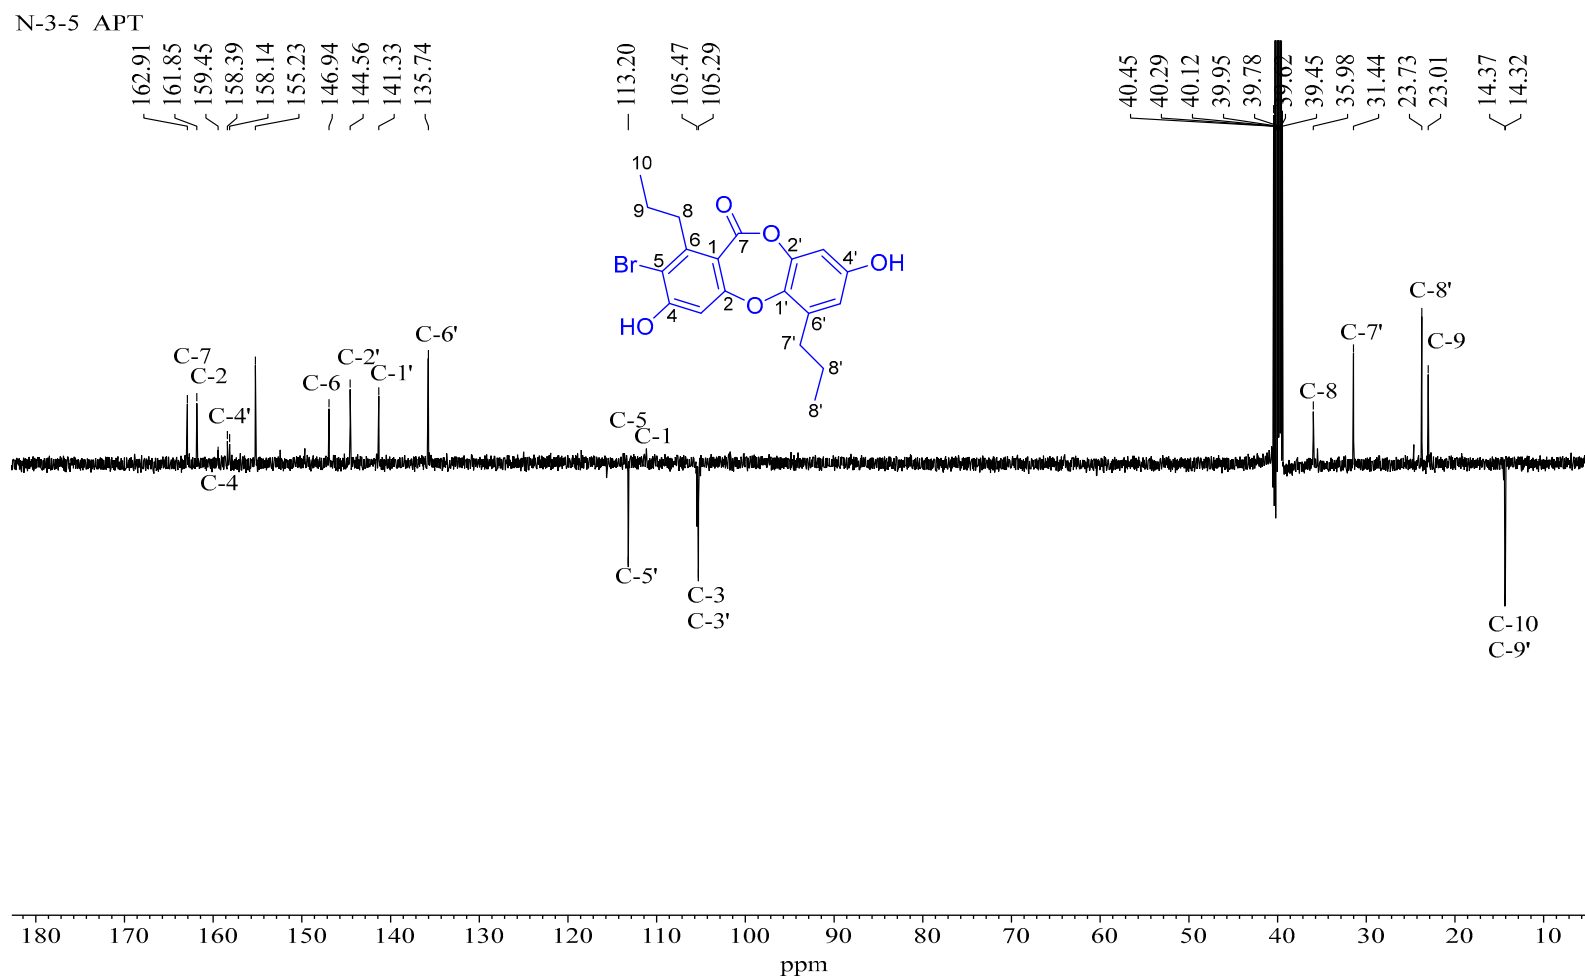

**Figure S2.** APT spectrum of **1** in DMSO-*d*<sub>6</sub> (125 MHz)

N-3-5 HSQC

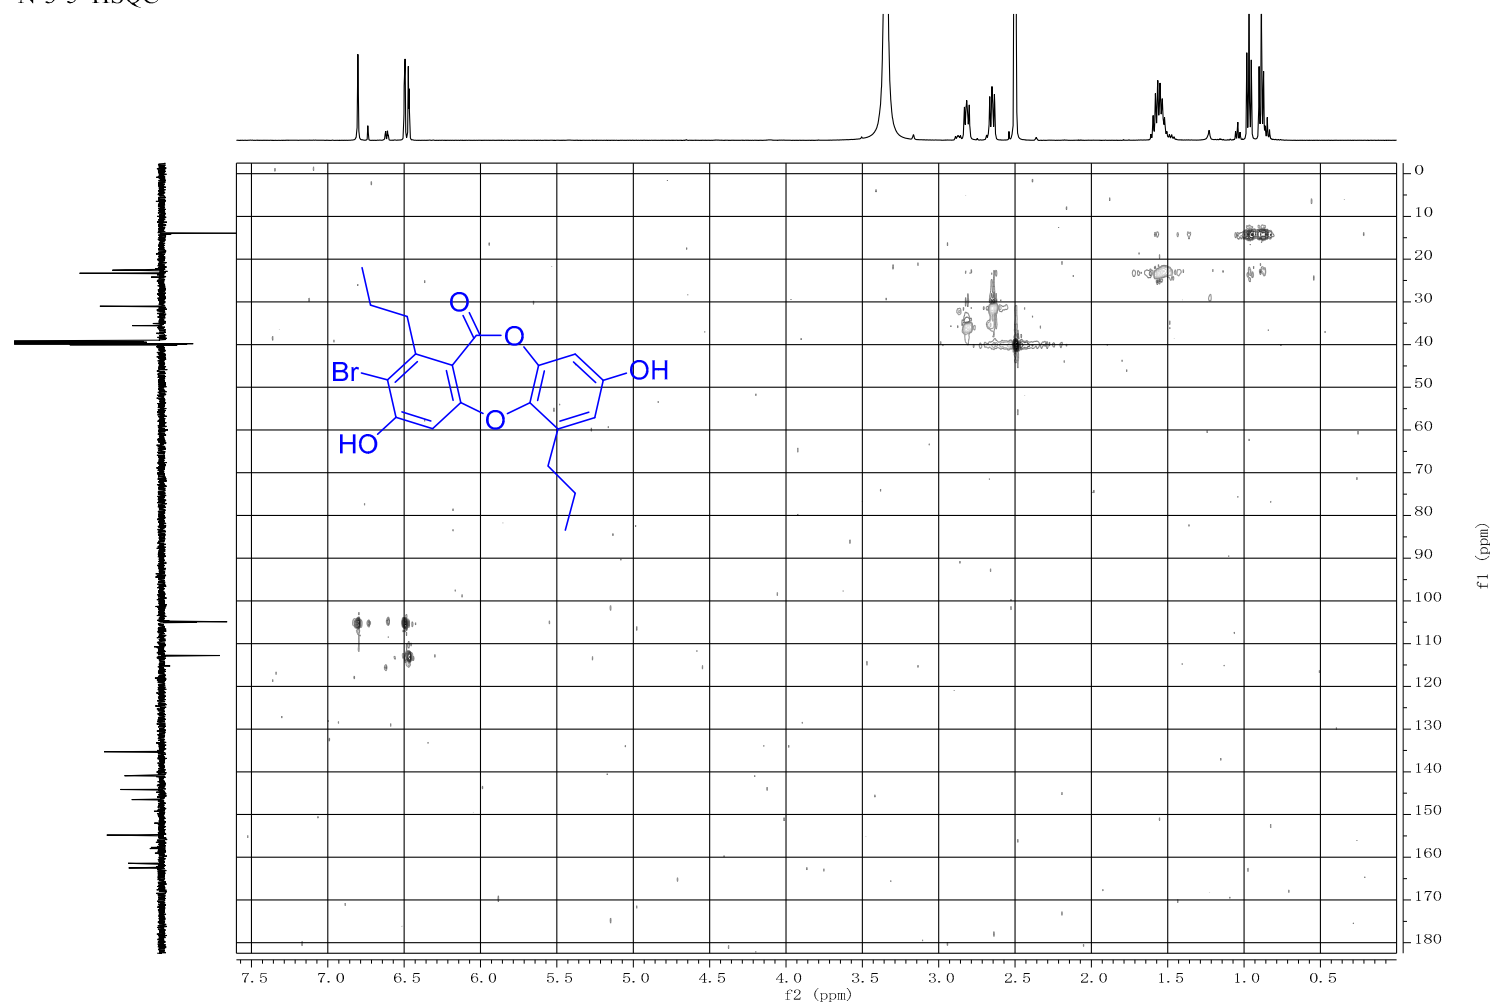

Figure S3. HSQC spectrum of **1** in  $\text{DMSO}-d_6$

N-3-5 COSY

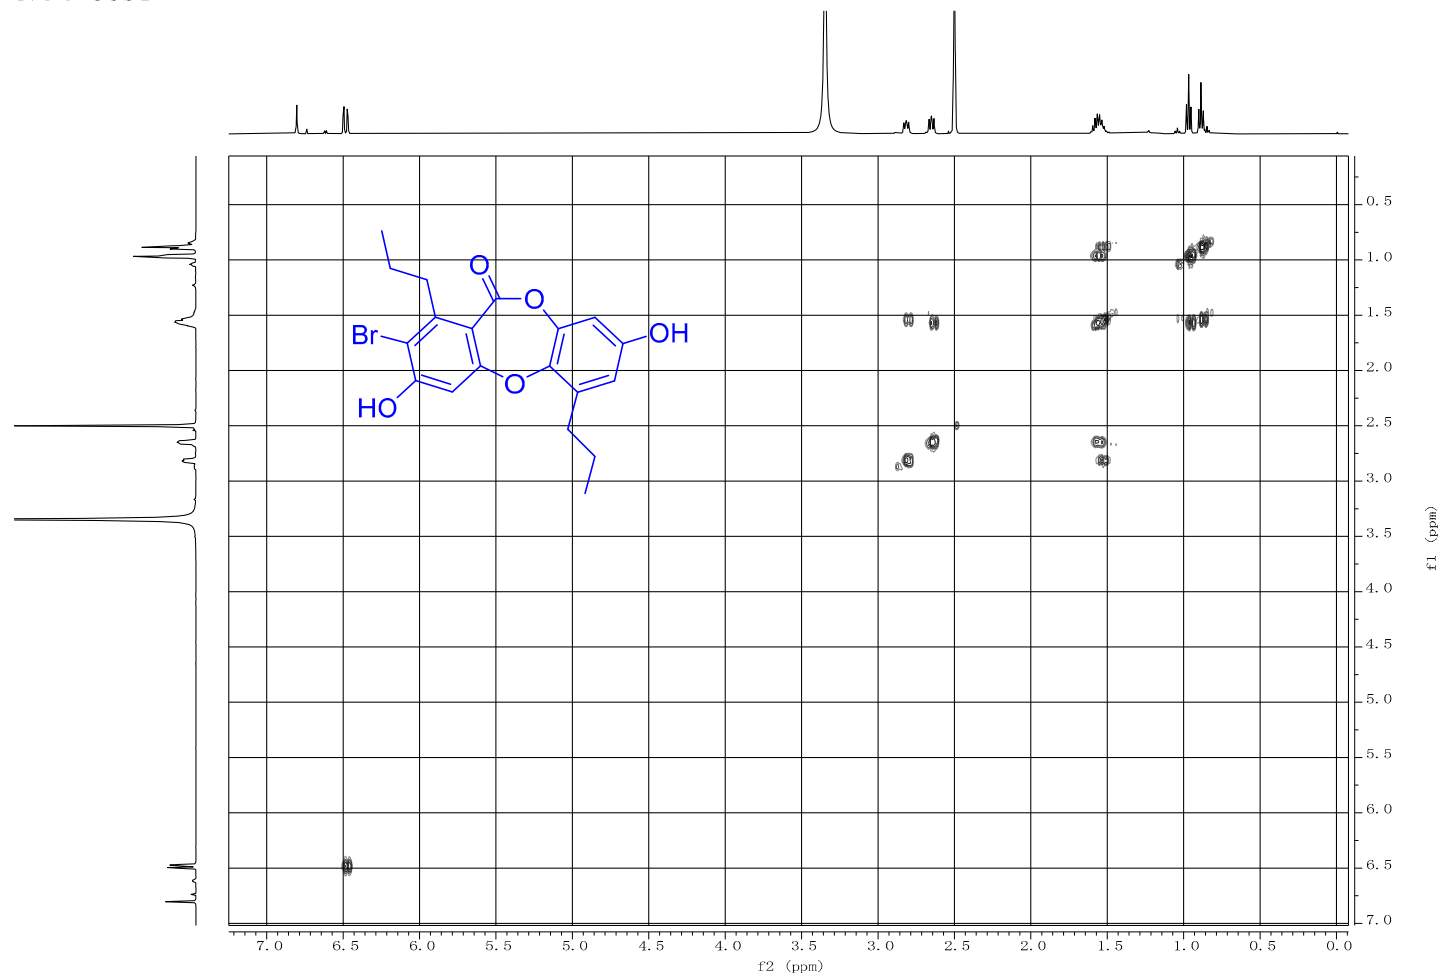

**Figure S4.**  $^1\text{H}$ - $^1\text{H}$  COSY spectrum of **1** in  $\text{DMSO-}d_6$

N-3-5 HMBC

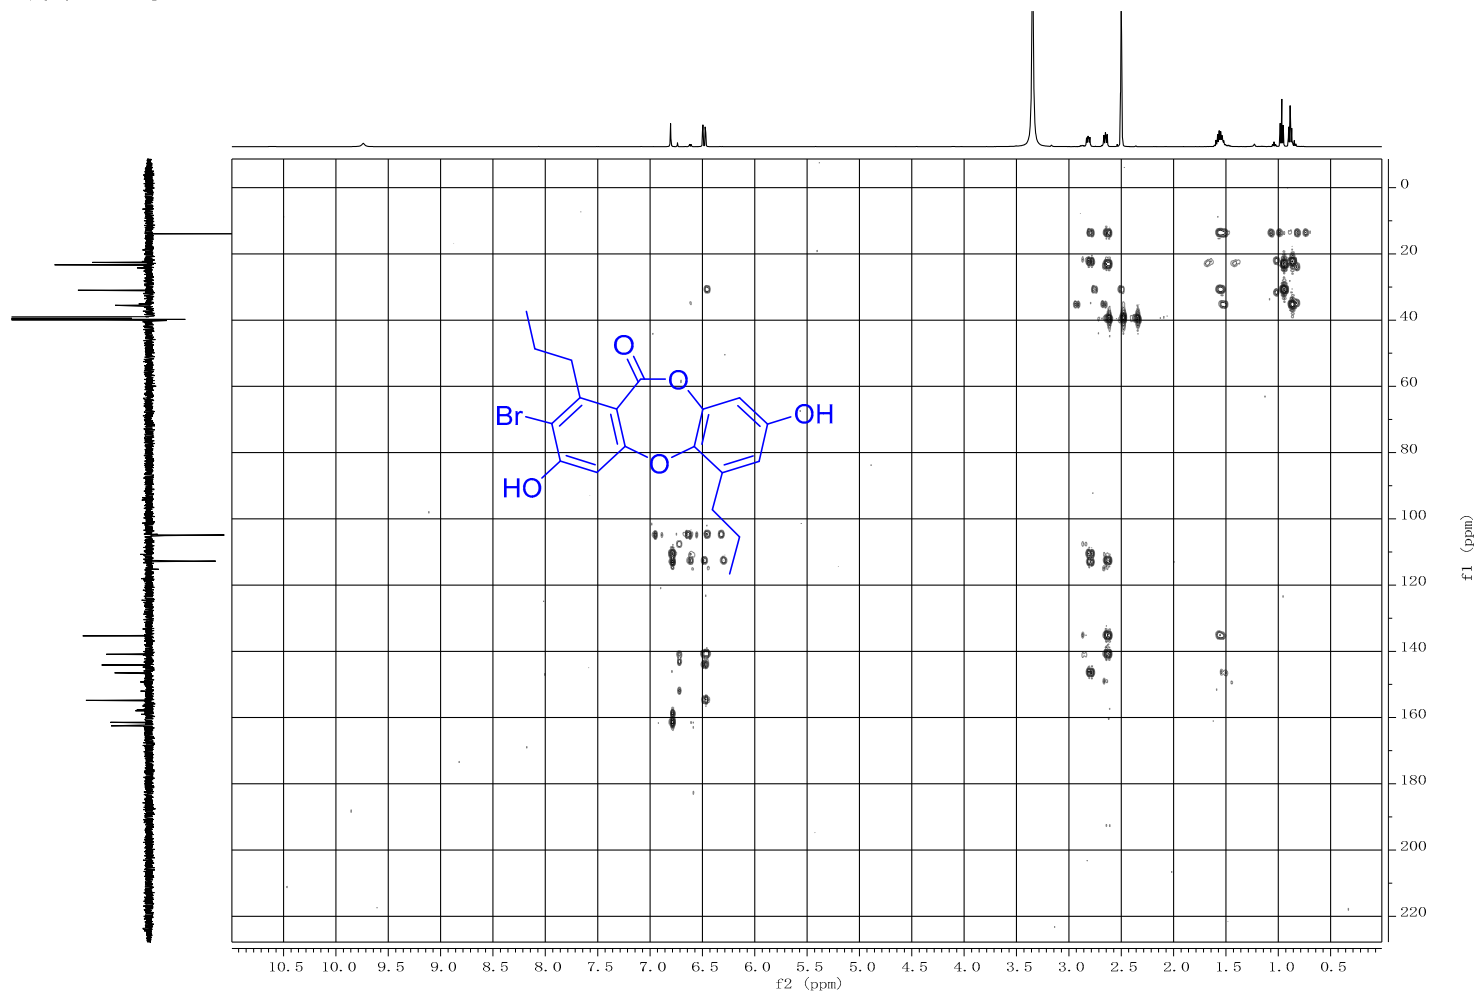

Figure S5. HMBC spectrum of **1** in DMSO-*d*<sub>6</sub>

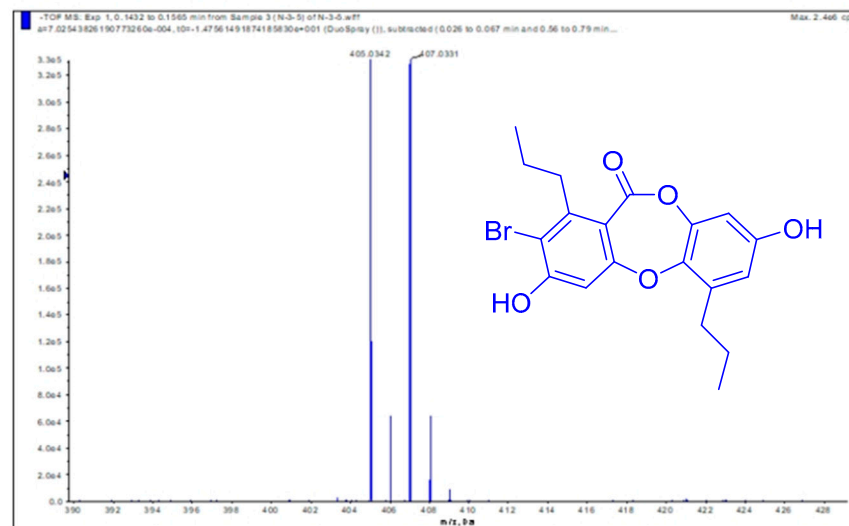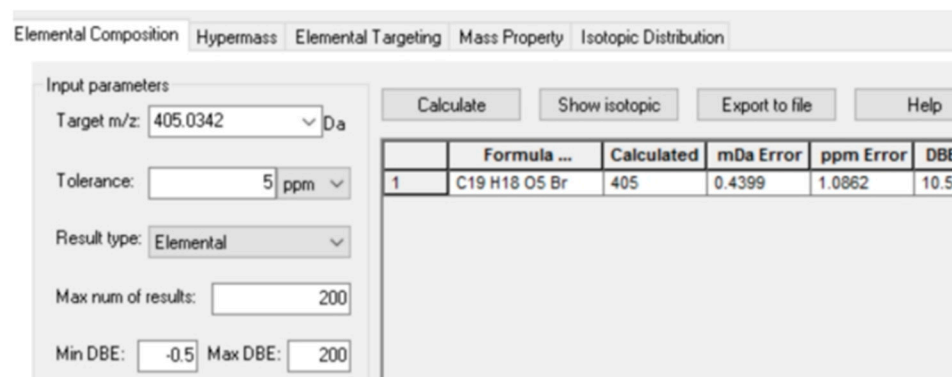

**Figure S6.** HRESIMS spectrum of **1**



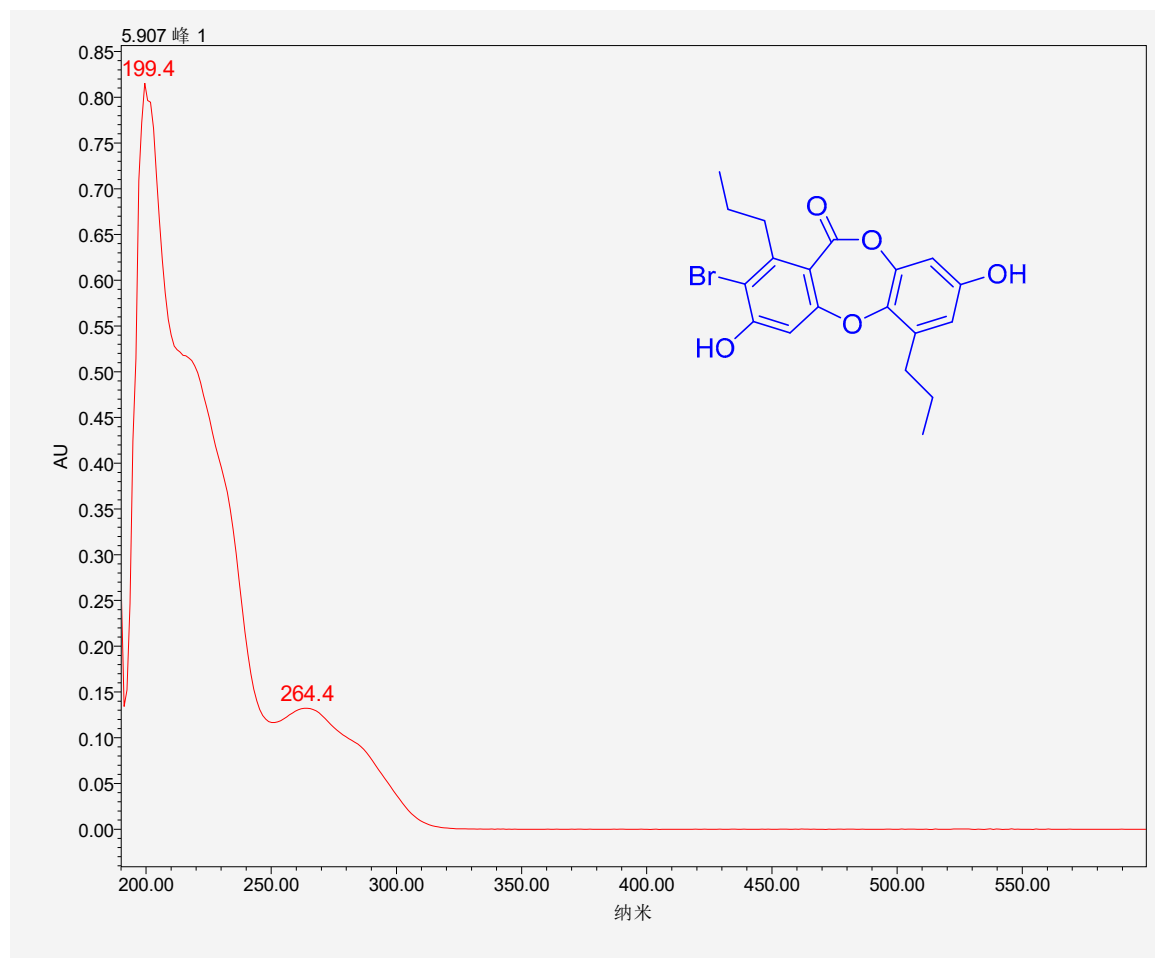

**Figure S7.** UV spectrum of **1**

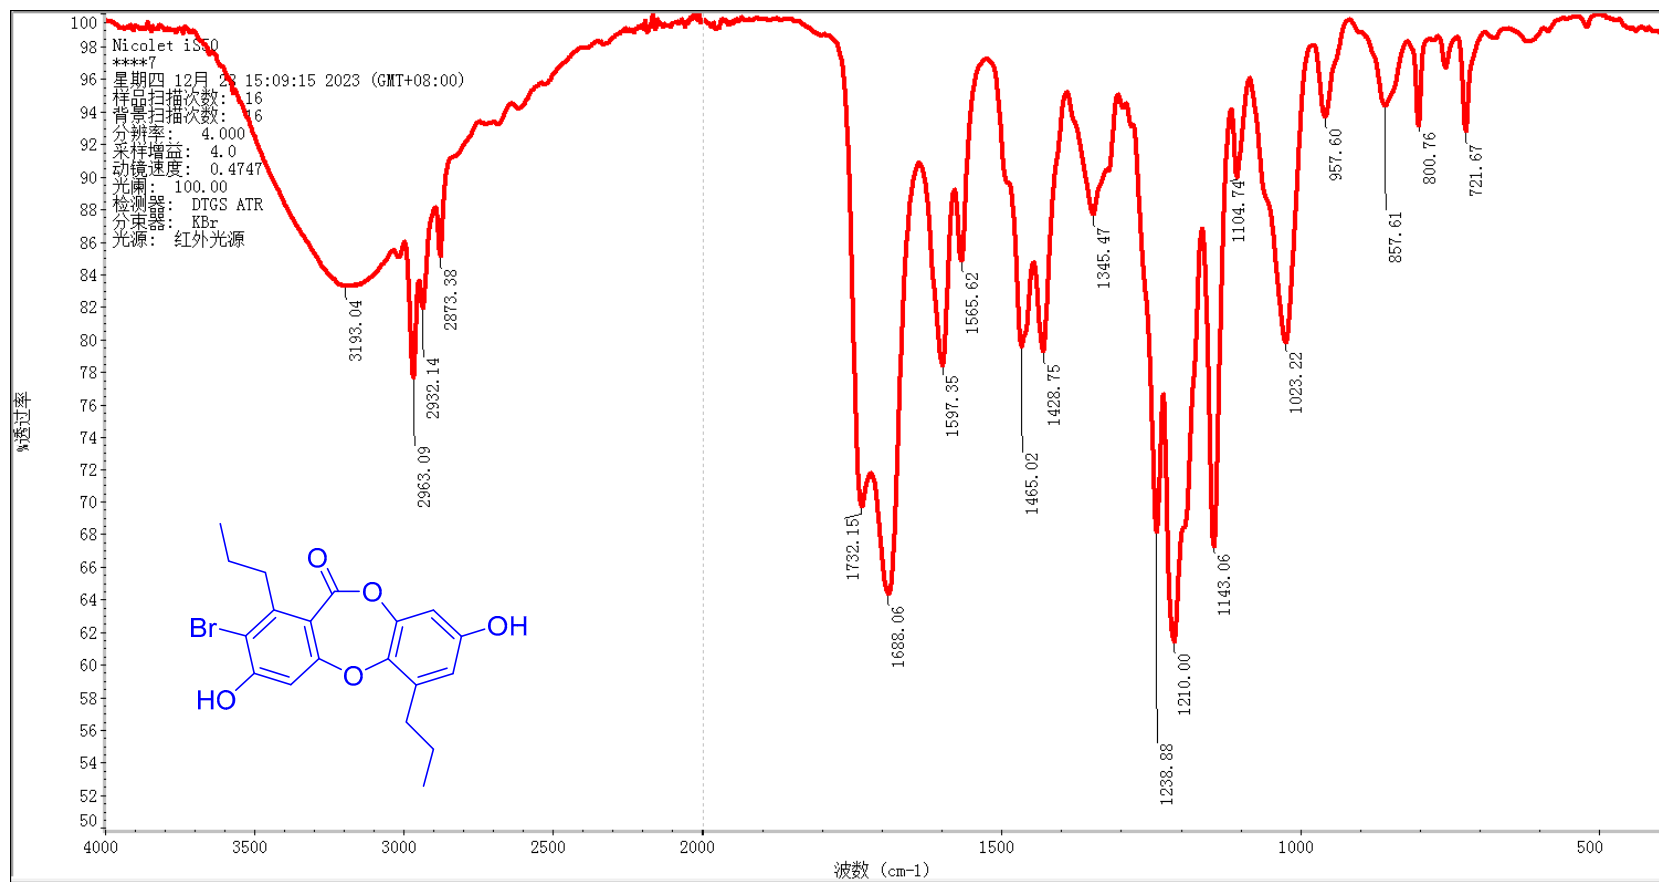

Figure S8. IR spectrum of **1**

**Table S2. <sup>1</sup>H and <sup>13</sup>C NMR data and key COSY and HMBC correlations of 2**

| No. | $\delta_{\text{H}}$ | $\delta_{\text{C}}$   | COSY | HMBC                         |
|-----|---------------------|-----------------------|------|------------------------------|
| 1   |                     | 112.5, C              |      |                              |
| 2   |                     | 160.4, C              |      |                              |
| 3   |                     | 98.9, C               |      |                              |
| 4   |                     | 159.6, C              |      |                              |
| 5   | 6.79, s             | 115.1, CH             |      | C-1, C-3, C-4, C-8           |
| 6   |                     | 148.5, C              |      |                              |
| 7   |                     | 162.1, C              |      |                              |
| 8   | 2.66, t (7.8)       | 35.7, CH <sub>2</sub> |      | C-1, C-5, C-6, C-9, C-10     |
| 9   | 1.49, m             | 24.5, CH <sub>2</sub> |      | C-6, C-8, C-10               |
| 10  | 0.86, t (7.3)       | 14.3, CH <sub>3</sub> |      | C-8, C-9                     |
| 1'  |                     | 142.0, C              |      |                              |
| 2'  |                     | 143.4, C              |      |                              |
| 3'  | 6.77, s             | 105.6, CH             |      | C-1', C-2', C-4', C-5'       |
| 4'  |                     | 152.9, C              |      |                              |
| 5'  |                     | 108.8, C              |      |                              |
| 6'  |                     | 136.0, C              |      |                              |
| 7'  | 3.13, t (8.0)       | 33.0, CH <sub>2</sub> |      | C-1', C-5', C-6', C-8', C-9' |
| 8'  | 1.48, m             | 23.1, CH <sub>2</sub> |      | C-6', C-7', C-9'             |
| 9'  | 1.00, t (7.3)       | 14.4, CH <sub>3</sub> |      | C-7', C-8'                   |

N-5-2 500 MHz DMSO

— 11.6136

— 10.6915

6.7868  
6.7716

3.1463  
3.1304  
3.1143  
2.6725  
2.6605  
2.6570  
2.6530  
2.6414  
2.5078  
2.5040  
2.5000  
2.4961  
2.4924

1.5134  
1.4985  
1.4823  
1.4679  
1.4533  
1.0157  
1.0012  
0.9867  
0.8643  
0.8498  
0.8351

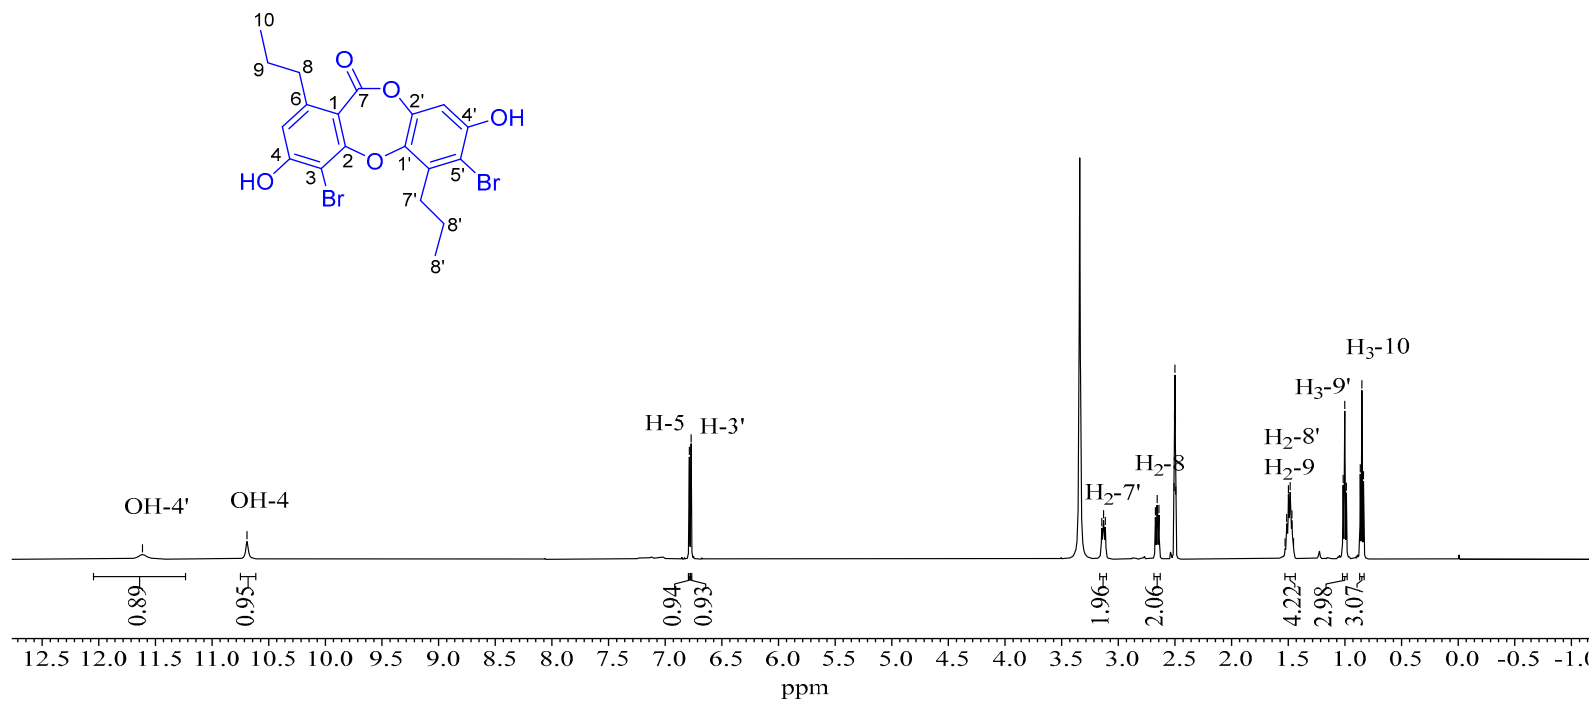

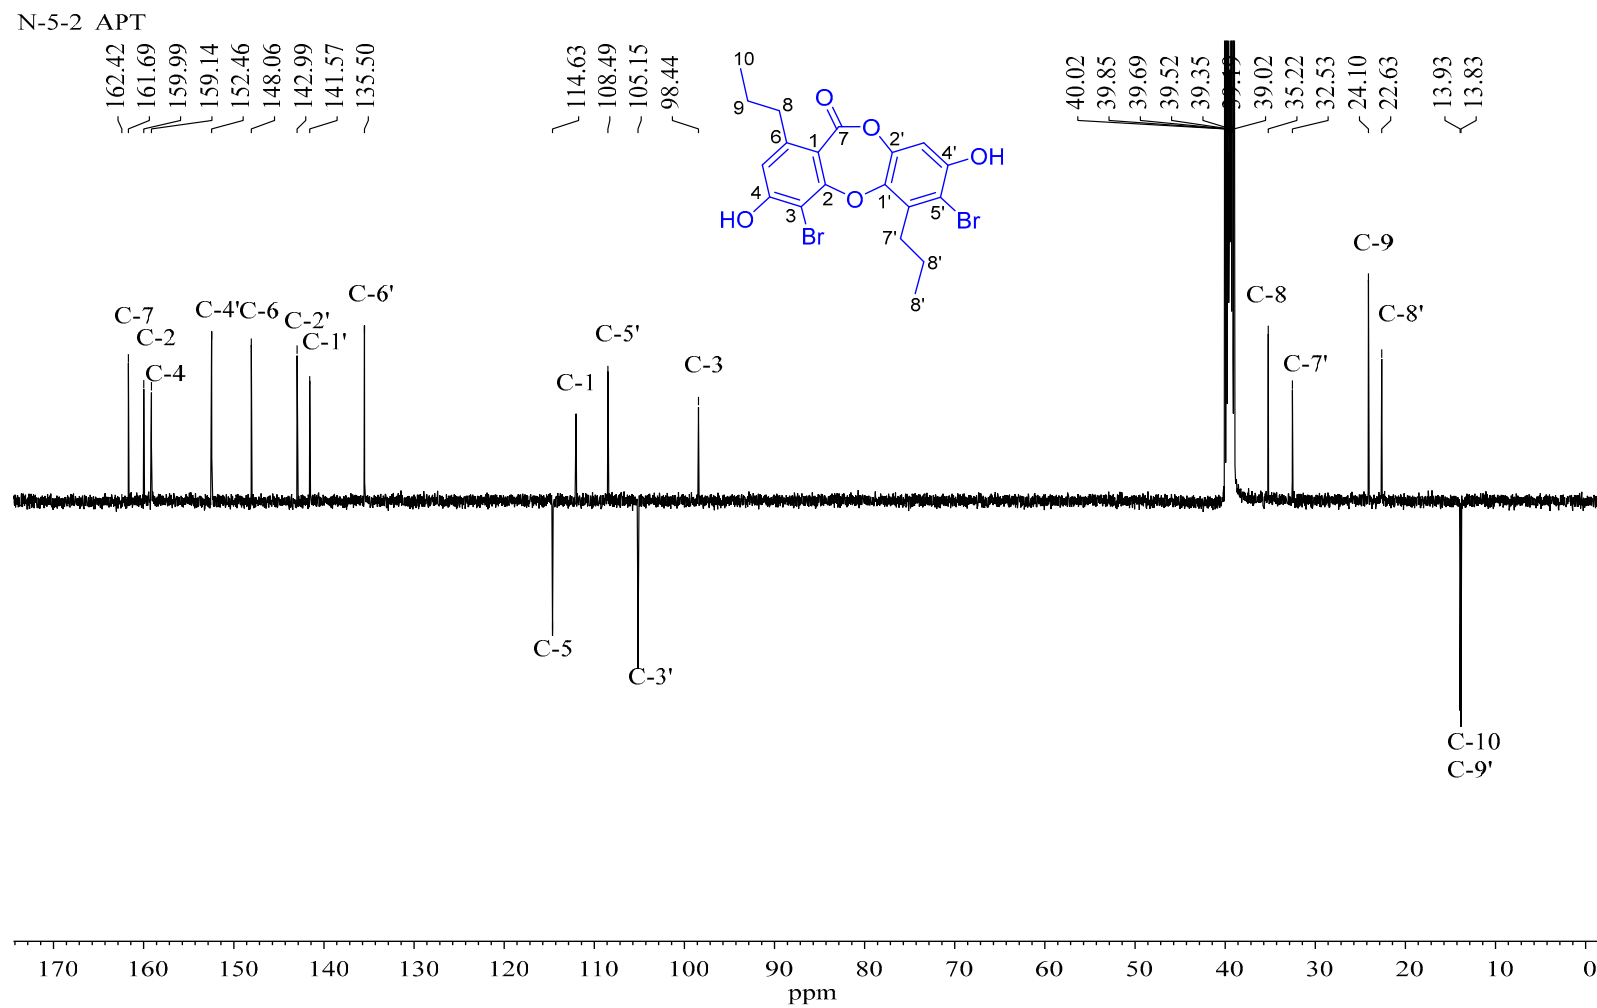

**Figure S10.** APT spectrum of **2** in DMSO-*d*<sub>6</sub> (125 MHz)

N-5-2 HSQC

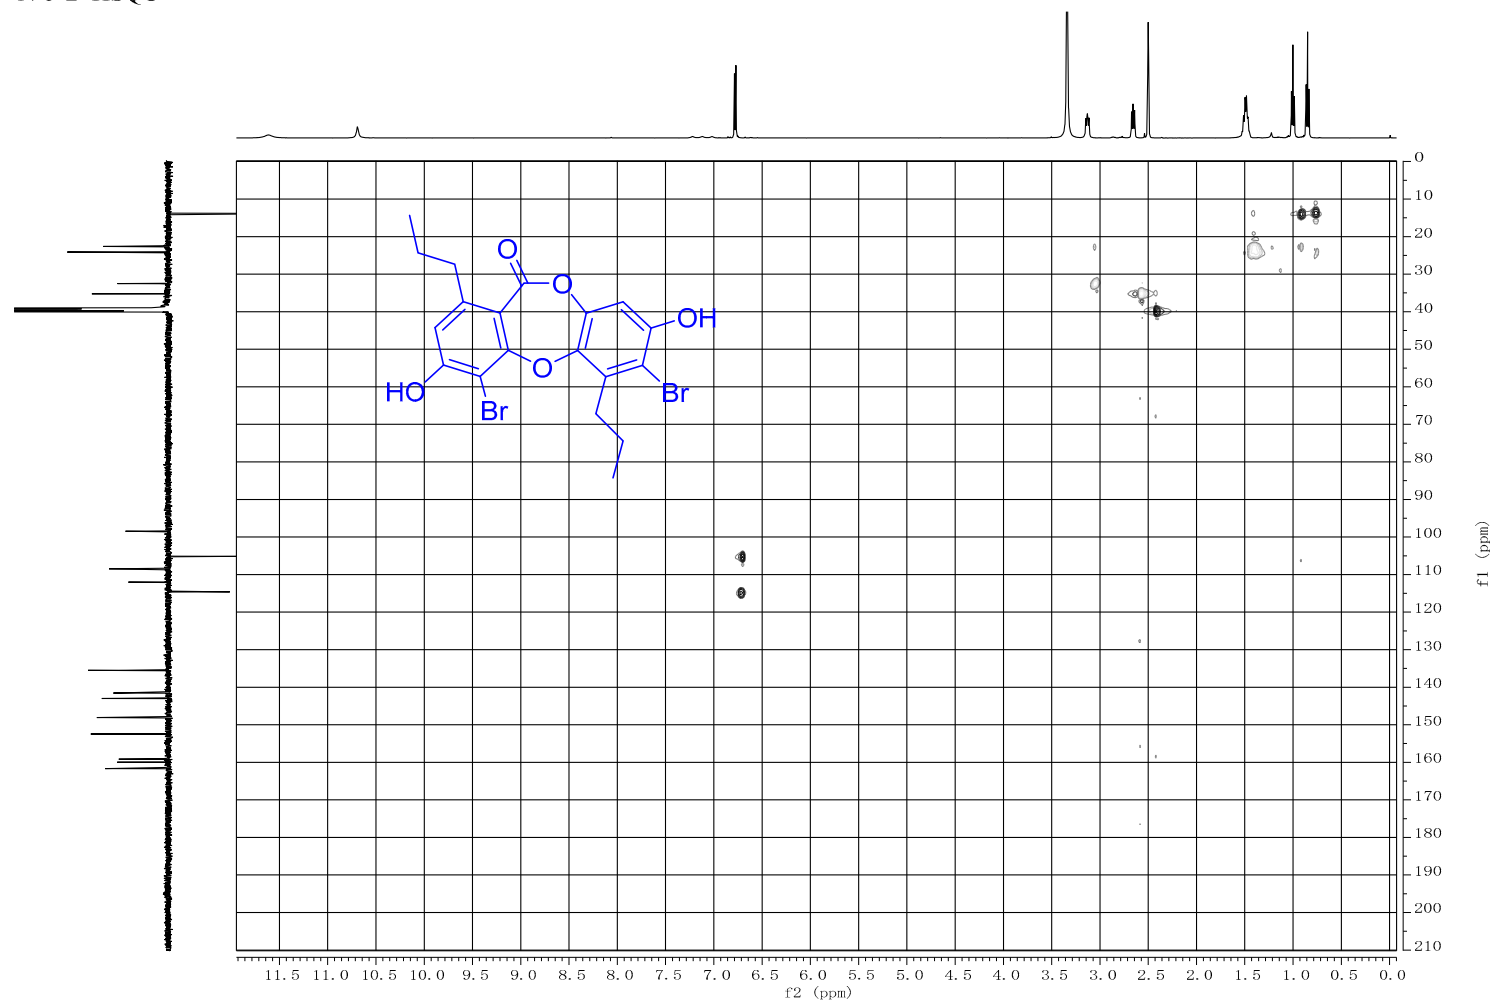

**Figure S11.** HSQC spectrum of **2** in DMSO-*d*<sub>6</sub>

N-5-2 COSY

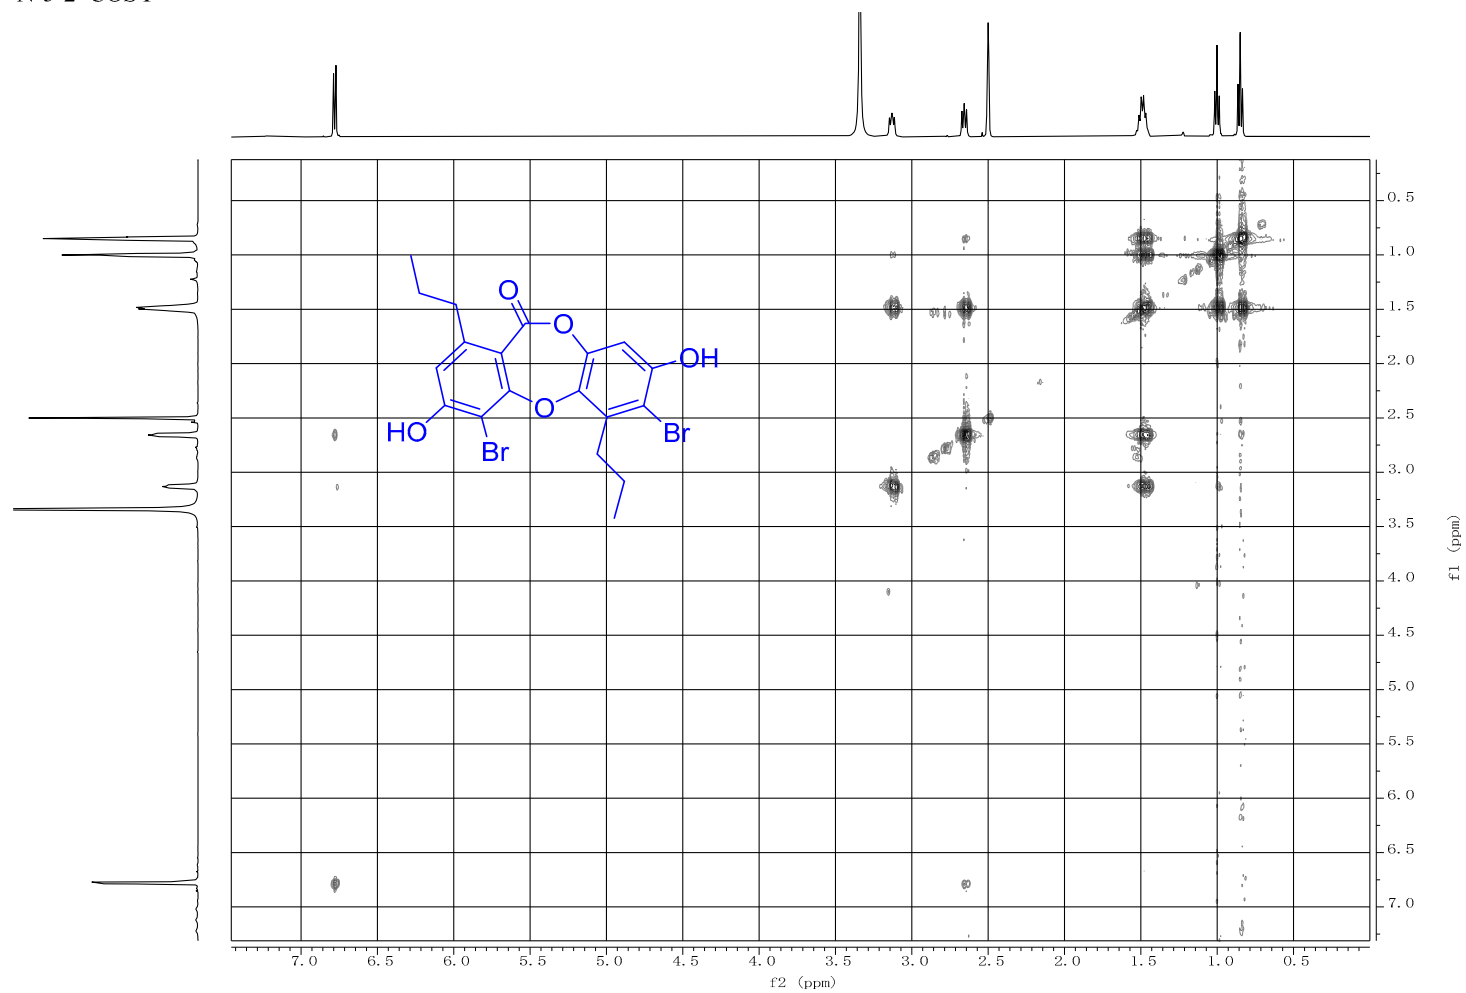

**Figure S12.**  $^1\text{H}$ - $^1\text{H}$  COSY spectrum of **2** in  $\text{DMSO}-d_6$

N-5-2 HMBC

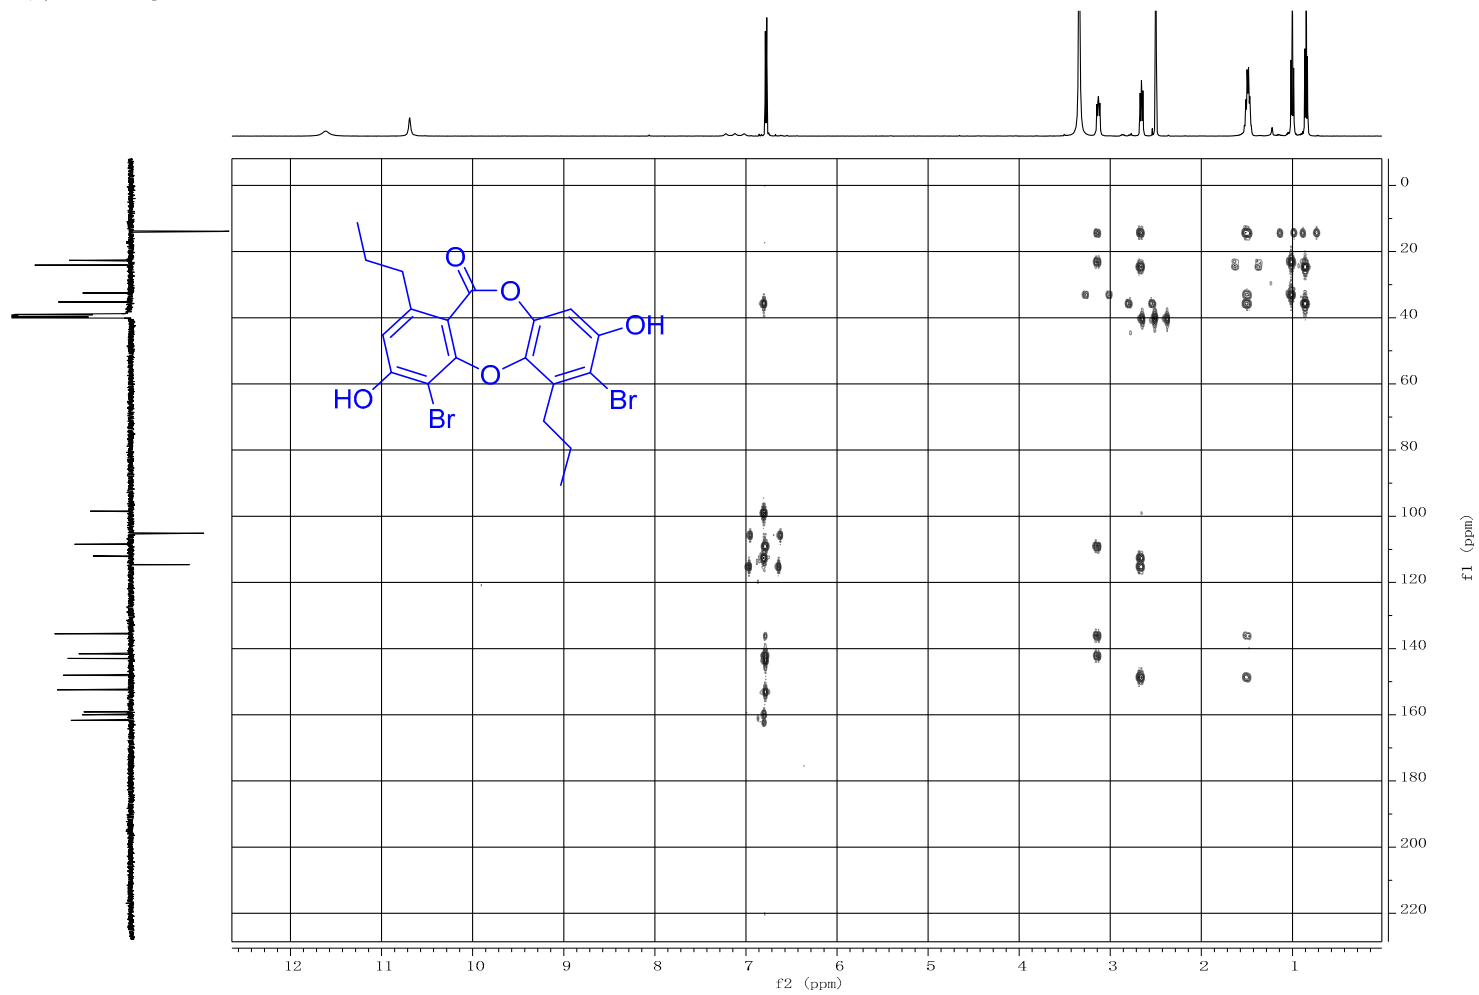

**Figure S13.** HMBC spectrum of **2** in DMSO-*d*<sub>6</sub>



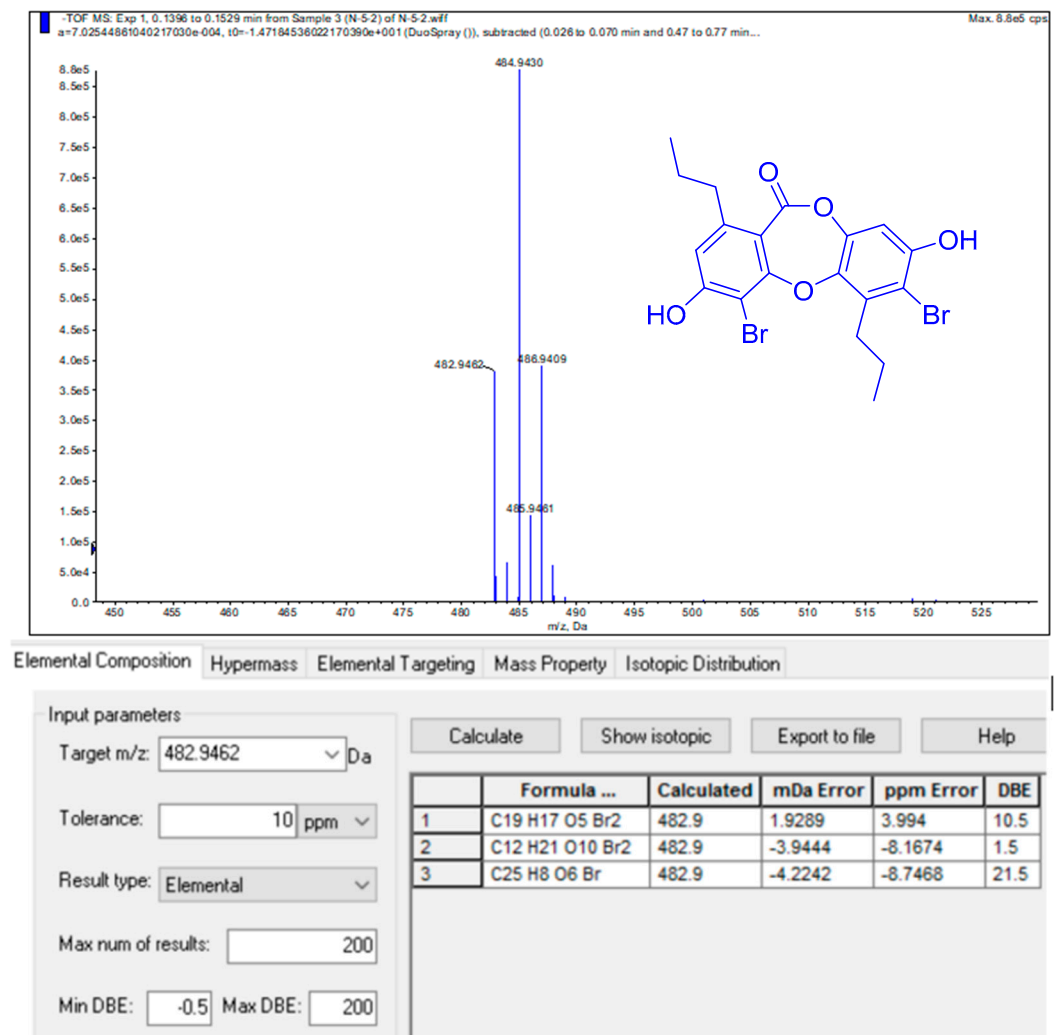

Figure S14. HRESIMS spectrum of 2

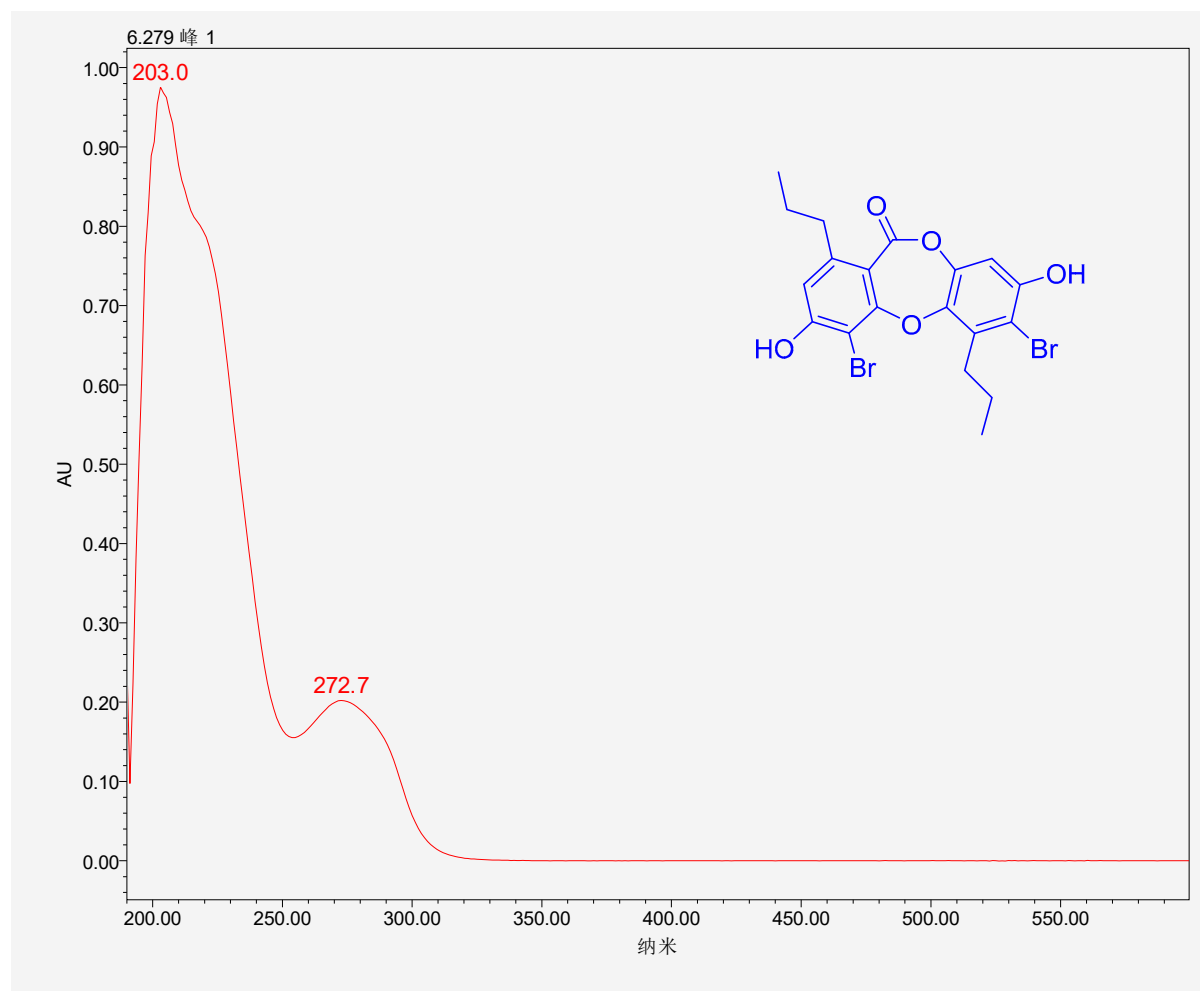

**Figure S15.** UV spectrum of **2**

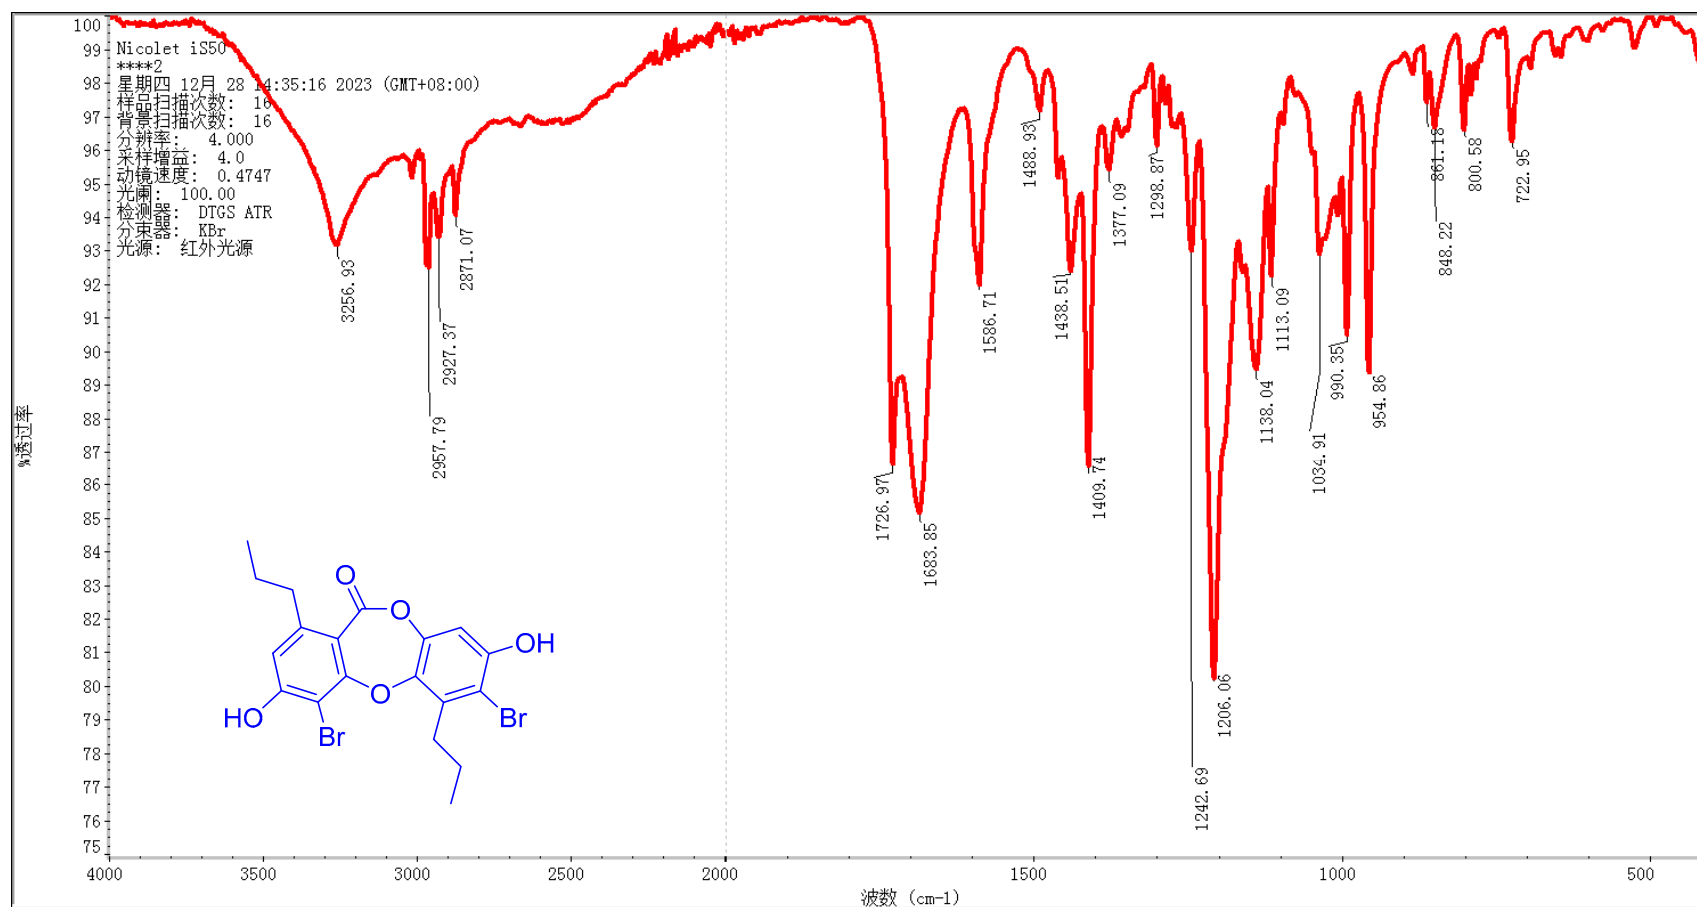

Figure S16. IR spectrum of **2**

**Table S3. <sup>1</sup>H and <sup>13</sup>C NMR data and key COSY and HMBC correlations of 3**

| No. | $\delta_{\text{H}}$ | $\delta_{\text{C}}$   | COSY | HMBC                         |
|-----|---------------------|-----------------------|------|------------------------------|
| 1   |                     | 112.3, C              |      |                              |
| 2   |                     | 160.6, C              |      |                              |
| 3   |                     | 99.0, C               |      |                              |
| 4   |                     | 159.7, C              |      |                              |
| 5   | 6.80, s             | 115.3, C              |      | C-1, C-3, C-4, C-8           |
| 6   |                     | 148.1, C              |      |                              |
| 7   |                     | 161.8, C              |      |                              |
| 8   | 2.70, t (7.6)       | 35.5, CH <sub>2</sub> |      | C-1, C-5, C-6, C-9, C-10     |
| 9   | 1.49, m             | 24.6, CH <sub>2</sub> |      | C-6, C-8, C-10               |
| 10  | 0.83, t (7.2)       | 14.1, CH <sub>3</sub> |      | C-8, C-9                     |
| 1'  |                     | 142.7, C              |      |                              |
| 2'  |                     | 142.9, C              |      |                              |
| 3'  |                     | 99.5, C               |      |                              |
| 4'  |                     | 153.0, C              |      |                              |
| 5'  | 6.69, s             | 113.3, CH             |      | C-1', C-4', C-5', C-7'       |
| 6'  |                     | 134.8, C              |      |                              |
| 7'  | 2.90, t (7.8)       | 32.7, CH <sub>2</sub> |      | C-1', C-5', C-6', C-8', C-9' |
| 8'  | 1.47, m             | 24.2, CH <sub>2</sub> |      | C-6', C-7', C-9'             |
| 9'  | 0.95, t (7.2)       | 14.1, CH <sub>3</sub> |      | C-7', C-8'                   |

I-8-2 500 MHz DMSO

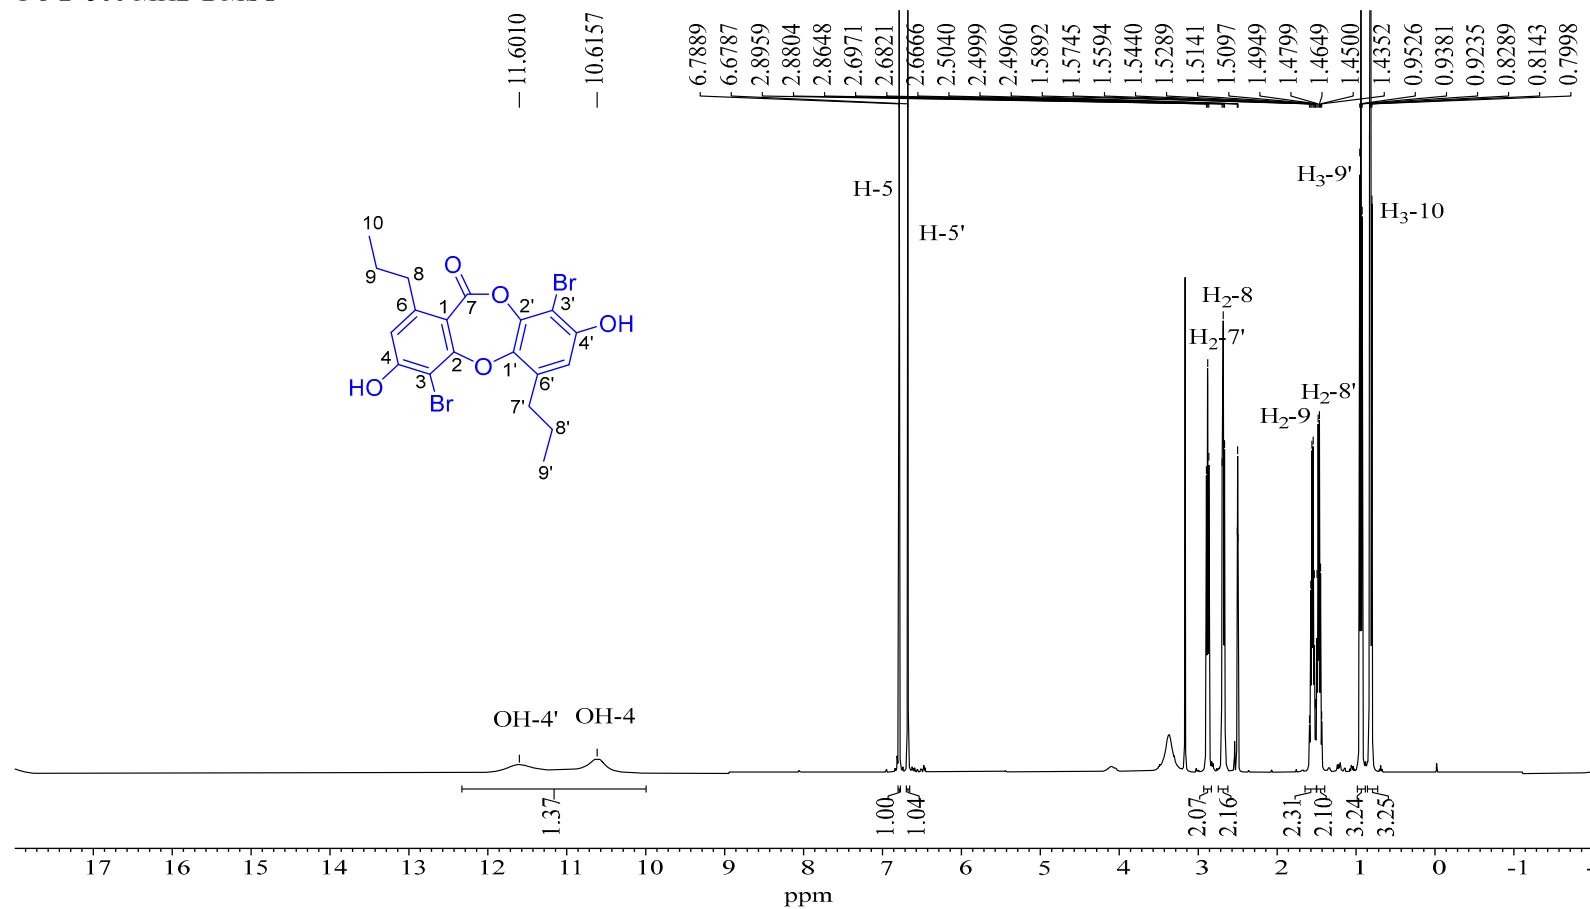

**Figure S17.** <sup>1</sup>H-NMR spectrum of **3** in DMSO-*d*<sub>6</sub> (500 MHz)

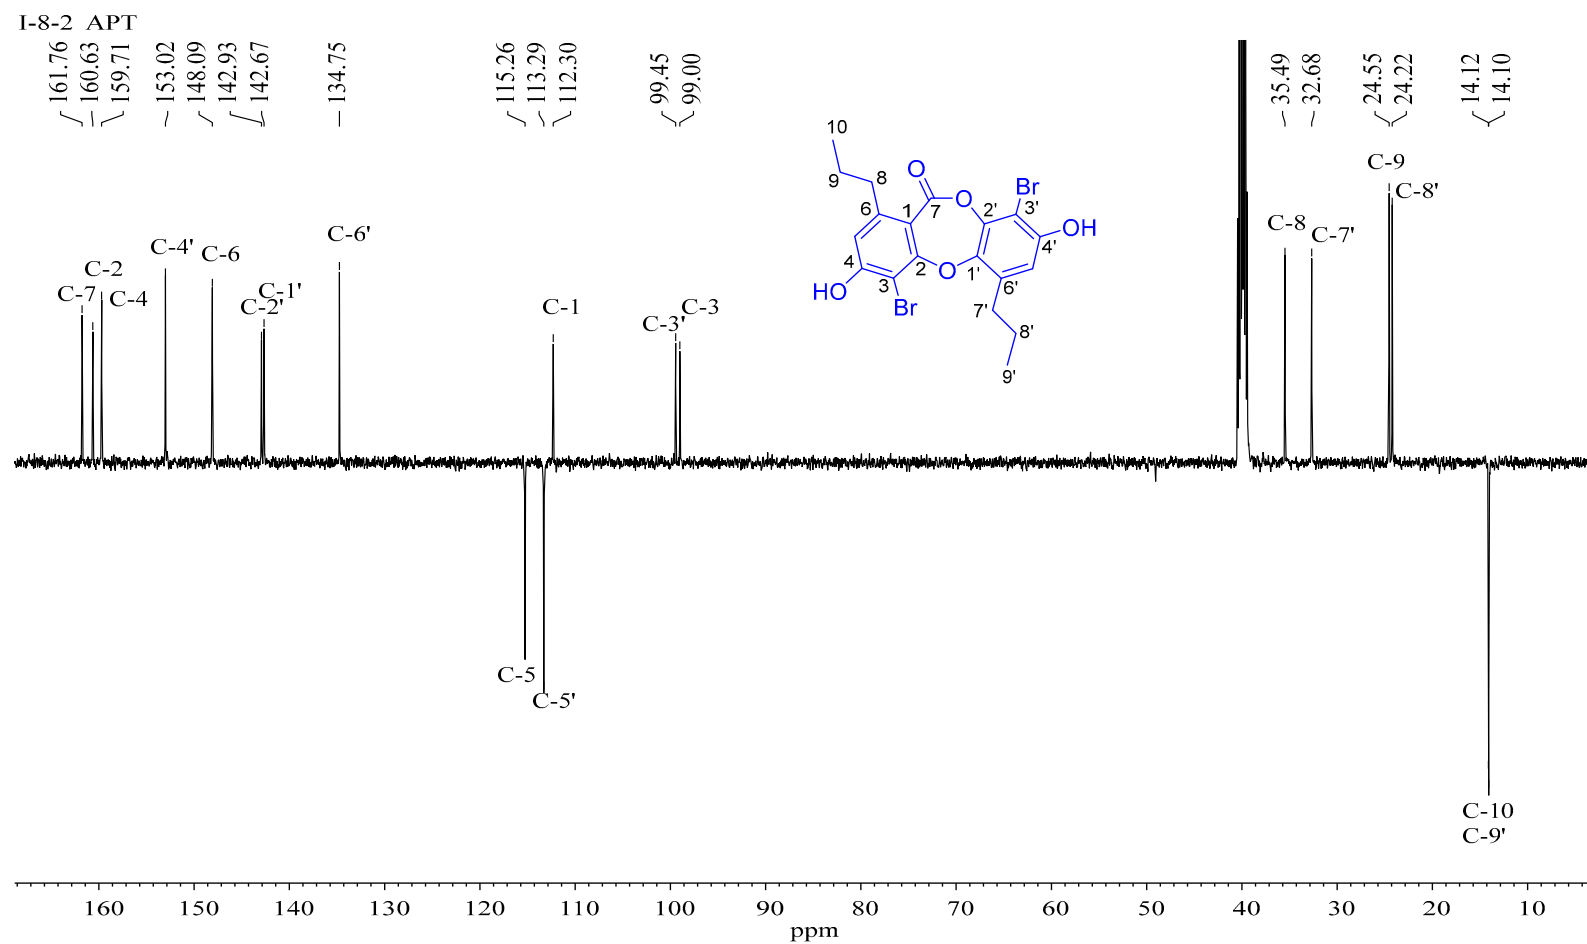

**Figure S18.** APT spectrum of **3** in DMSO-*d*<sub>6</sub> (125 MHz)

I-8-2 HSQC

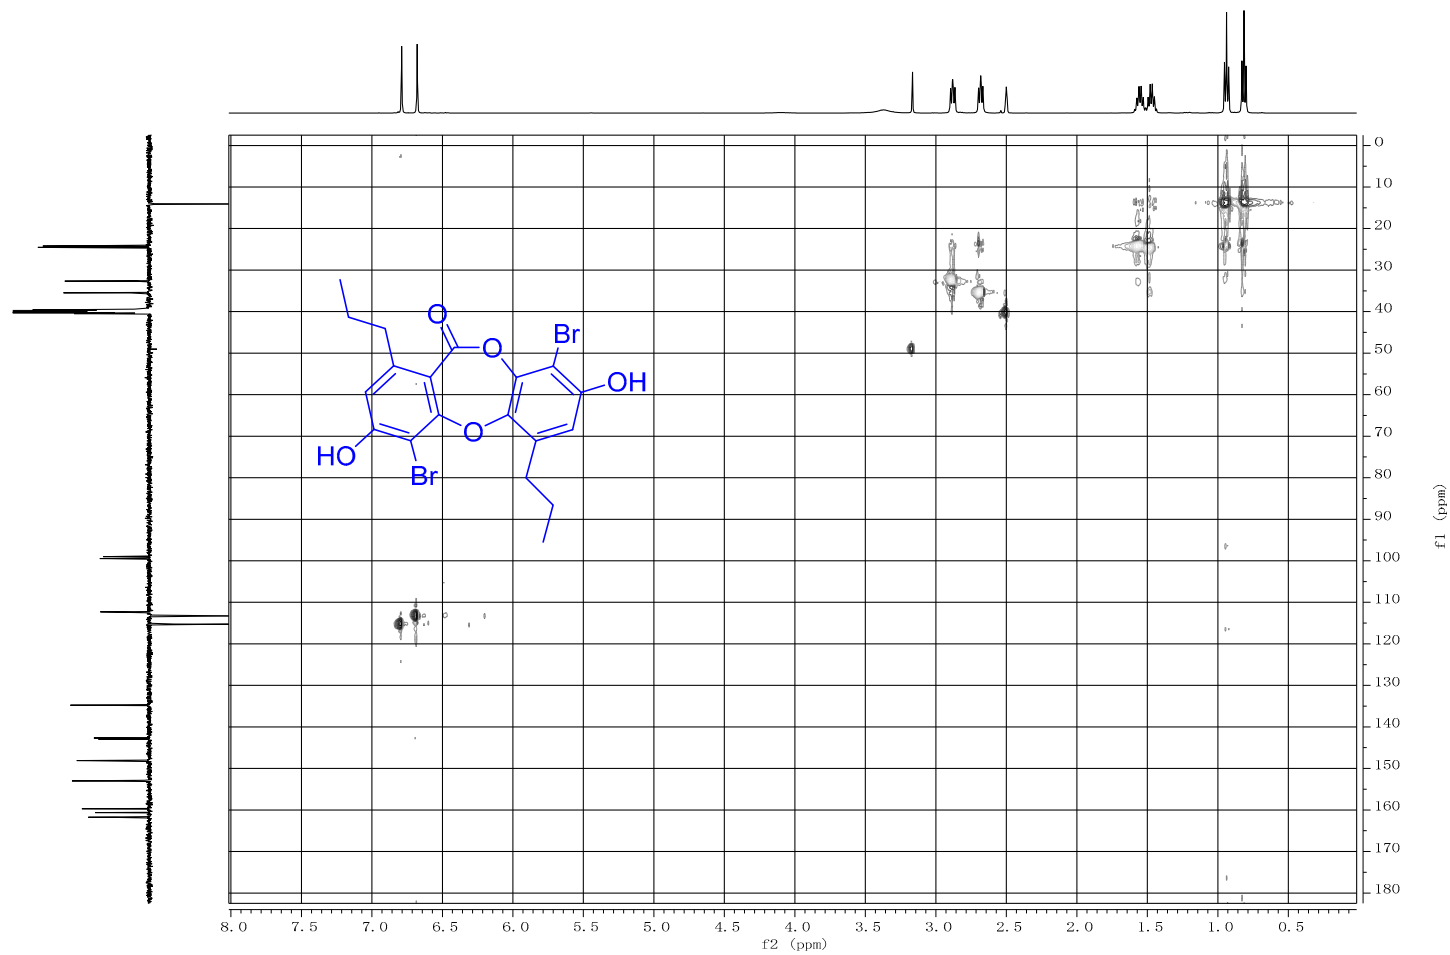

**Figure S19.** HSQC spectrum of **3** in DMSO-*d*<sub>6</sub>

I-8-2 COSY

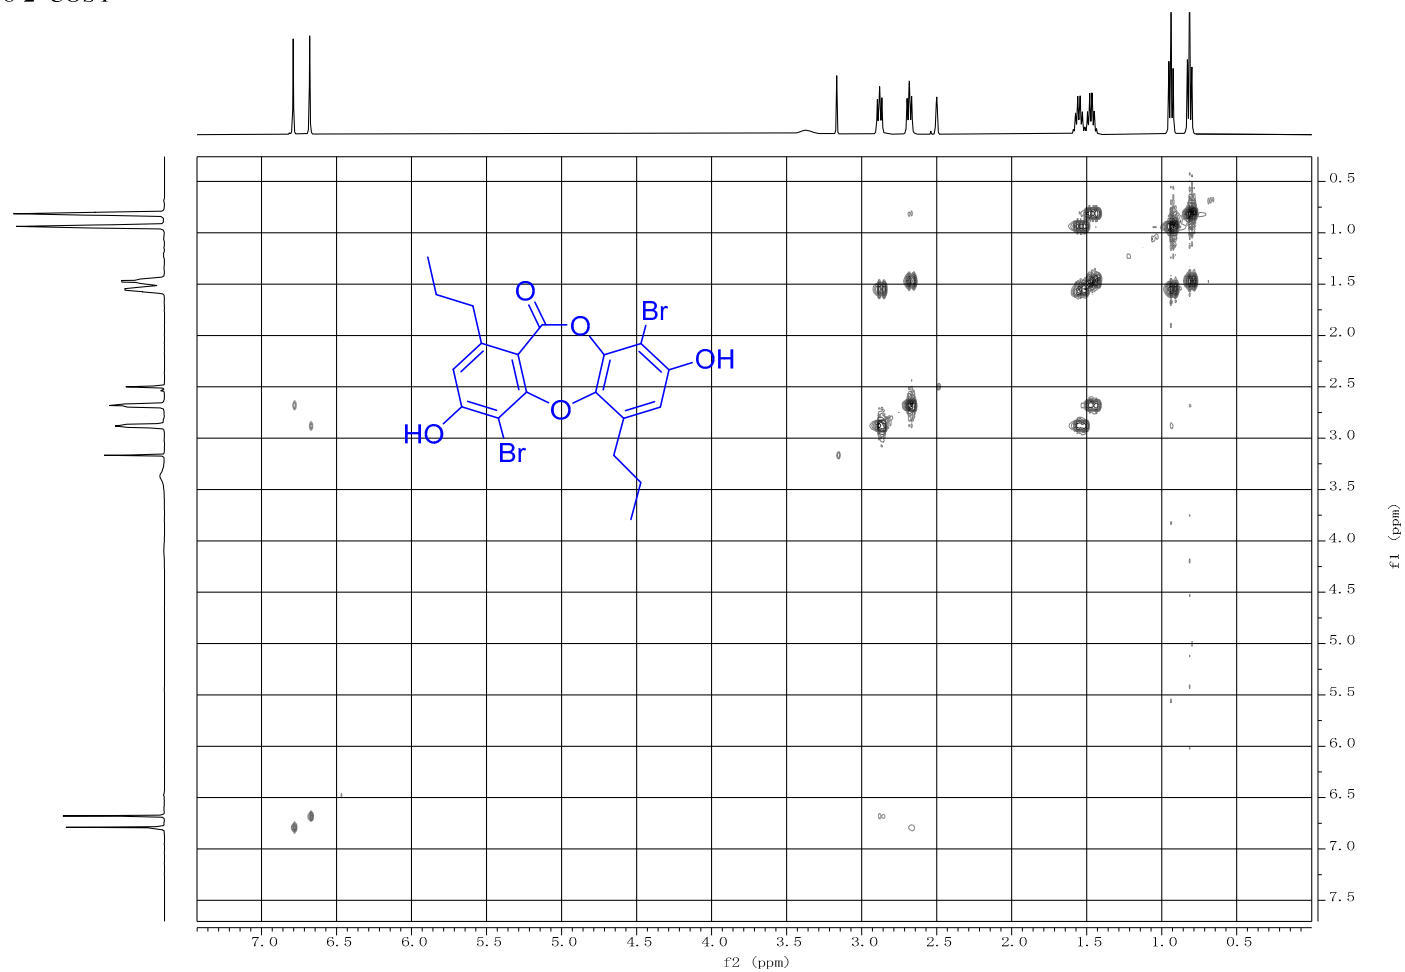

**Figure S20.**  $^1\text{H}$ - $^1\text{H}$  COSY spectrum of **3** in  $\text{DMSO-}d_6$



I-8-2 HMBC

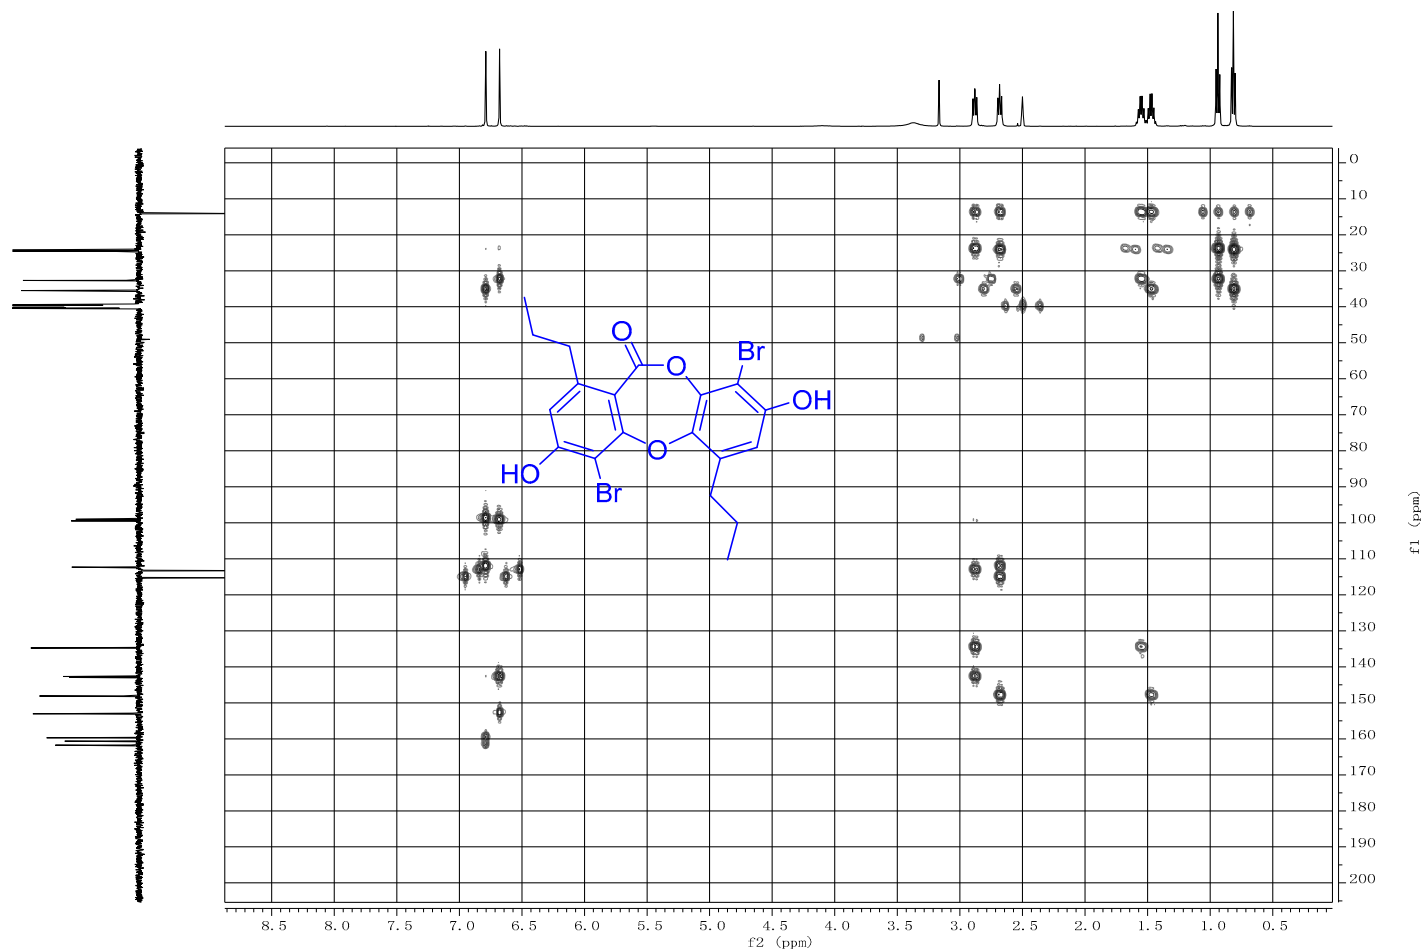

**Figure S21.** HMBC spectrum of **3** in DMSO-*d*<sub>6</sub>

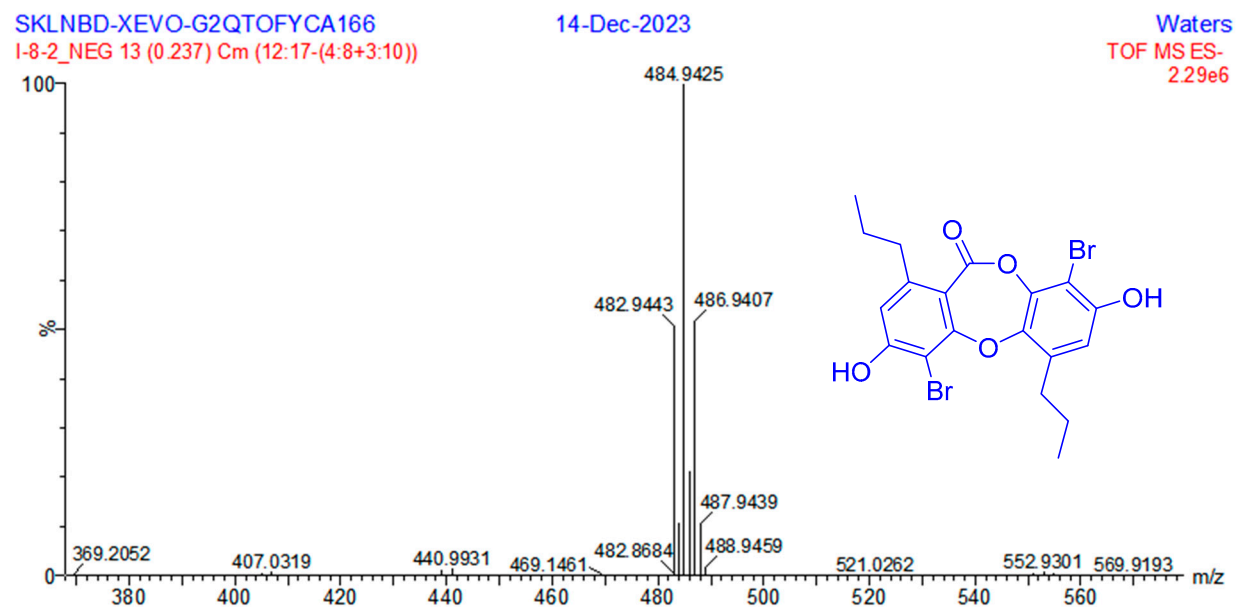

|          |                   |            |      |       |       |        |                |                                                                |
|----------|-------------------|------------|------|-------|-------|--------|----------------|----------------------------------------------------------------|
| Maximum: |                   | 3.0        | 5.0  | 120.0 |       |        |                |                                                                |
| Mass     | <u>Calc. Mass</u> | <u>mDa</u> | PPM  | DBE   | i-FIT | Norm   | <u>Conf(%)</u> | Formula                                                        |
| 482.9443 | 482.9443          | 0.0        | 0.0  | 10.5  | 647.6 | 0.000  | 100.00         | C <sub>19</sub> H <sub>17</sub> O <sub>5</sub> Br <sub>2</sub> |
|          | 482.9446          | -0.3       | -0.6 | 30.5  | 669.0 | 21.462 | 0.00           | C <sub>32</sub> H <sub>4</sub> O Br                            |

**Figure S22.** HRESIMS spectrum of **3**

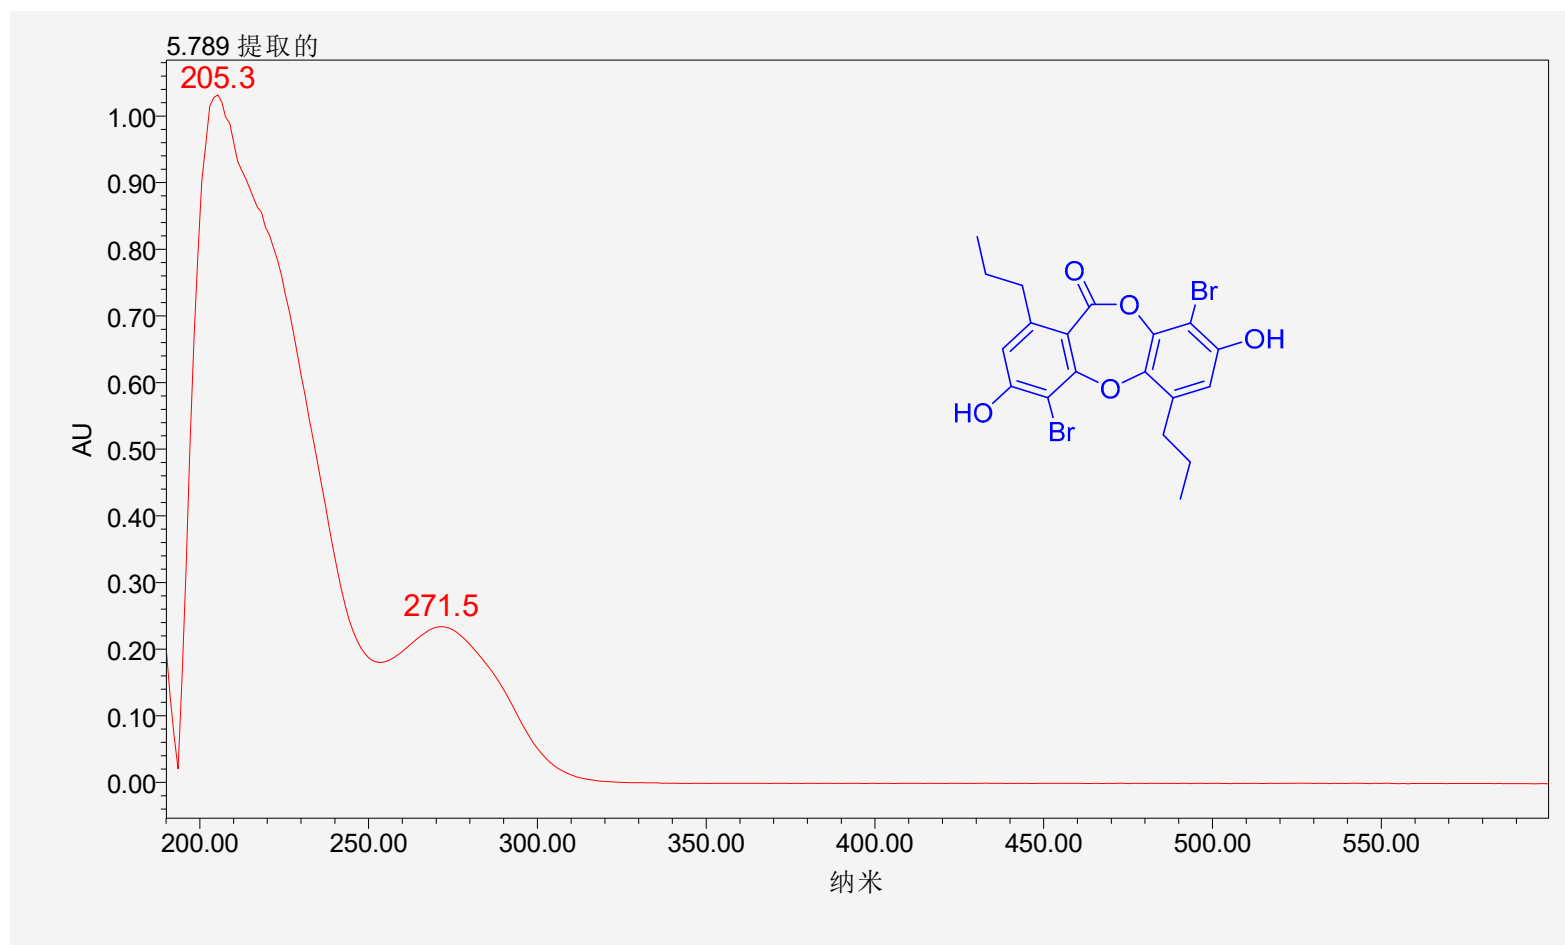

**Figure S23.** UV spectrum of **3**

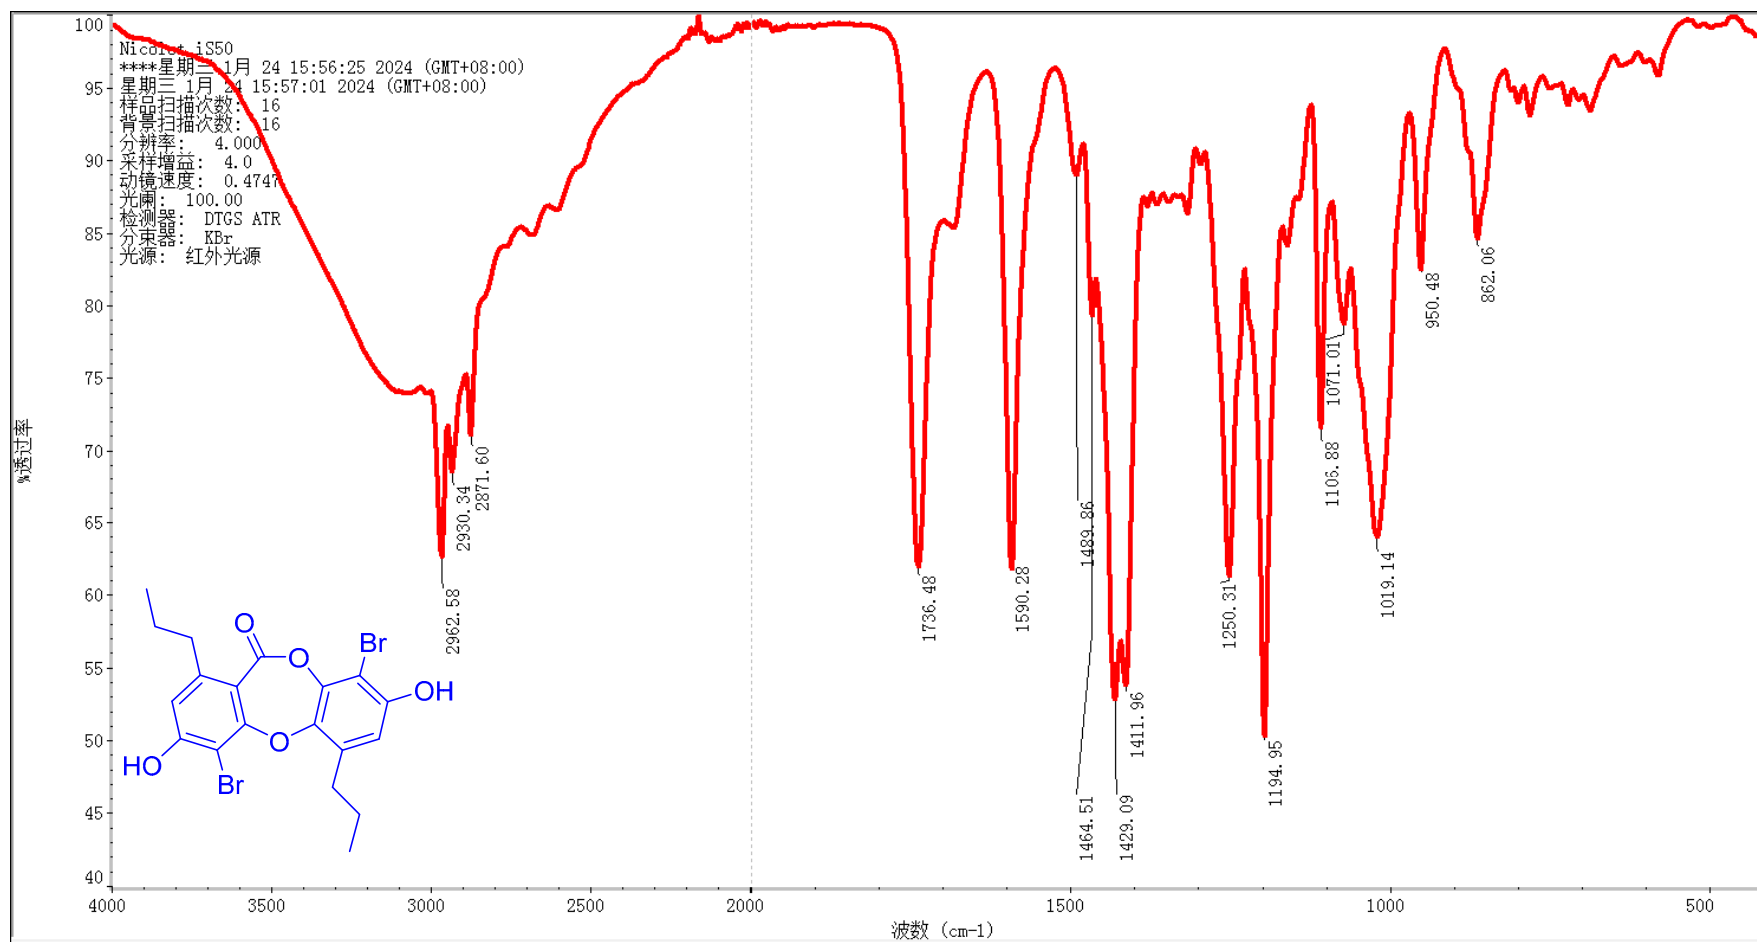

Figure S24. IR spectrum of **3**

**Table S4. <sup>1</sup>H and <sup>13</sup>C NMR data and key COSY and HMBC correlations of 4**

| No. | $\delta_{\text{H}}$ | $\delta_{\text{C}}$   | COSY                                   | HMBC                         |
|-----|---------------------|-----------------------|----------------------------------------|------------------------------|
| 1   |                     | 112.9, C              |                                        |                              |
| 2   |                     | 161.7, C              |                                        |                              |
| 3   | 6.71, s             | 105.2, CH             |                                        | C-1, C-2 C-4, C-5            |
| 4   |                     | 161.7, C              |                                        |                              |
| 5   |                     | 110.3, C              |                                        |                              |
| 6   |                     | 146.9, C              |                                        |                              |
| 7   |                     | 161.9, C              |                                        |                              |
| 8   | 2.86, t (7.7)       | 35.7, CH <sub>2</sub> | H <sub>2</sub> -9                      | C-1, C-5, C-6, C-9, C-10     |
| 9   | 1.54, m             | 22.9, CH <sub>2</sub> | H <sub>2</sub> -8, H <sub>3</sub> -10  | C-6, C-8, C-10               |
| 10  | 0.86, t (7.3)       | 14.2, CH <sub>3</sub> | H <sub>2</sub> -9                      | C-8, C-9                     |
| 1'  |                     | 142.0, C              |                                        |                              |
| 2'  |                     | 142.1, C              |                                        |                              |
| 3'  |                     | 102.2, C              |                                        |                              |
| 4'  |                     | 151.0, C              |                                        |                              |
| 5'  |                     | 111.1, C              |                                        |                              |
| 6'  |                     | 134.0, C              |                                        |                              |
| 7'  | 2.81, t (8.1)       | 32.6, CH <sub>2</sub> | H <sub>2</sub> -8'                     | C-1', C-5', C-6', C-8', C-9' |
| 8'  | 1.51, m             | 22.5, CH <sub>2</sub> | H <sub>2</sub> -7', H <sub>3</sub> -9' | C-6', C-7', C-9'             |
| 9'  | 0.98, t (7.3)       | 14.9, CH <sub>3</sub> | H <sub>2</sub> -8'                     | C-7', C-8'                   |

N-6-5-Y 500 MHz DMSO

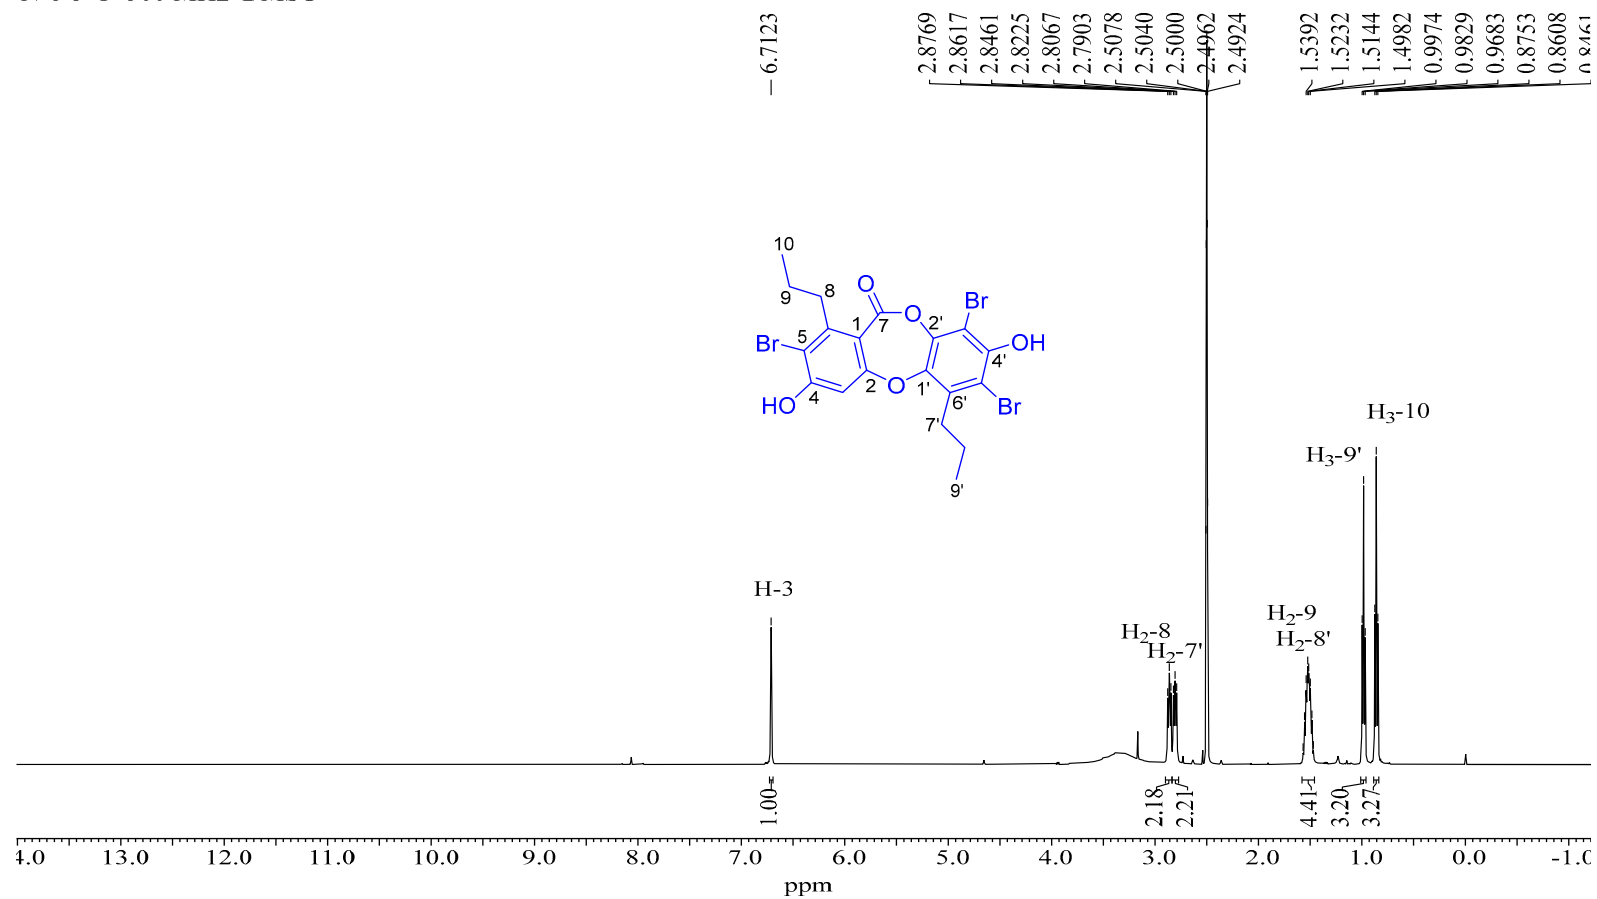

Figure S25. <sup>1</sup>H-NMR spectrum of **4** in DMSO-*d*<sub>6</sub> (500 MHz)

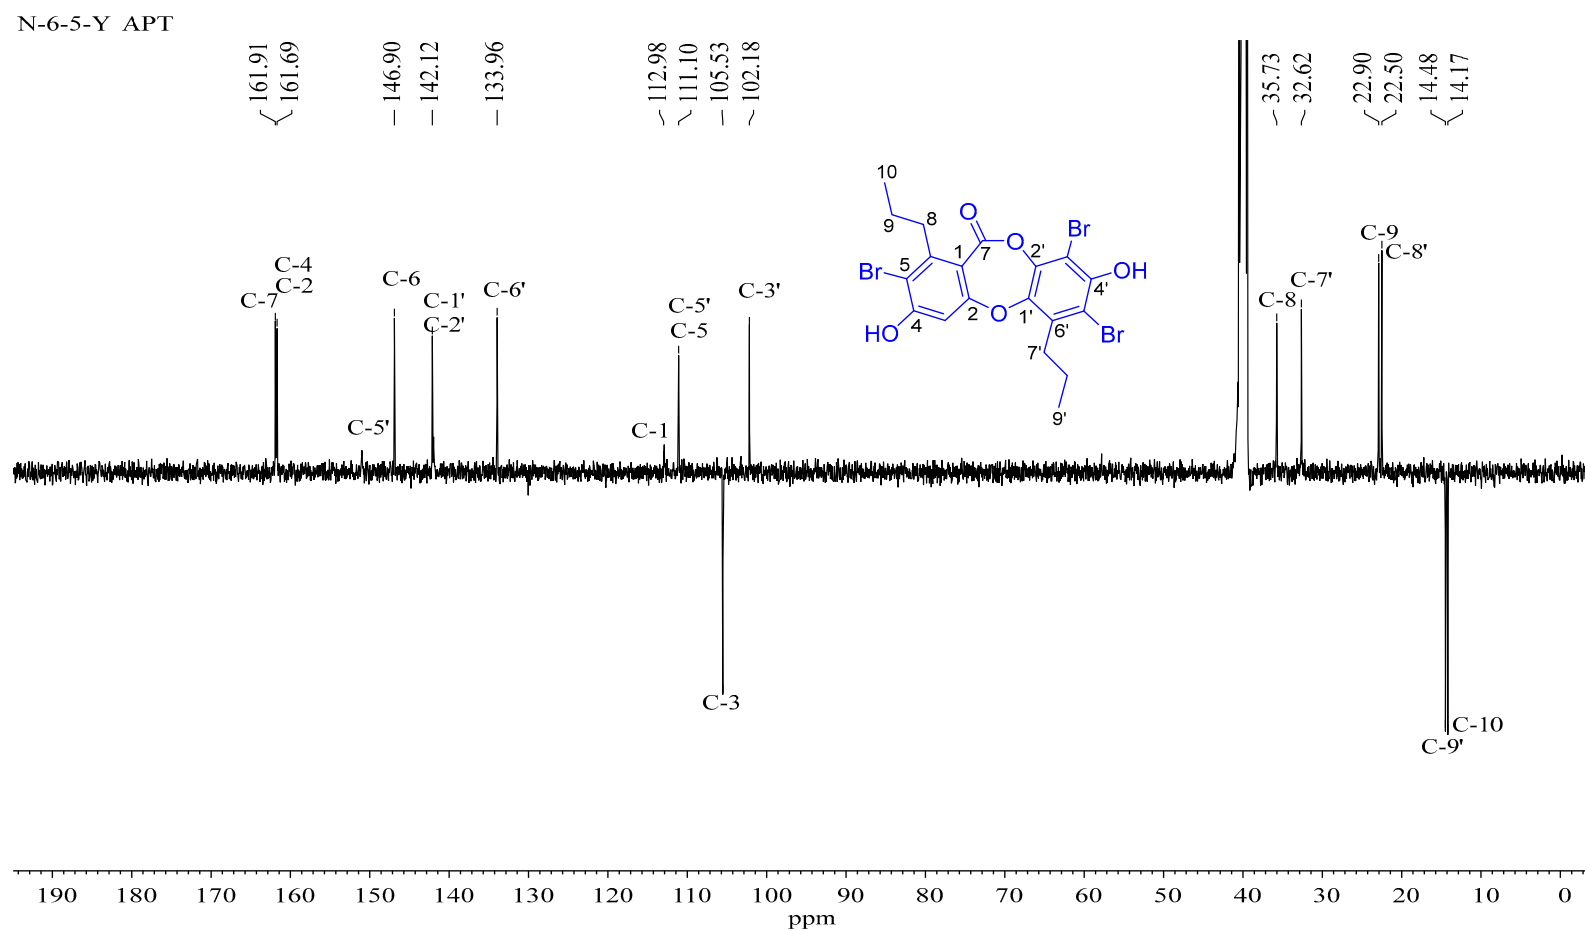

**Figure S26.** APT spectrum of **4** in DMSO-*d*<sub>6</sub> (125 MHz)

N-6-5-Y HSQC

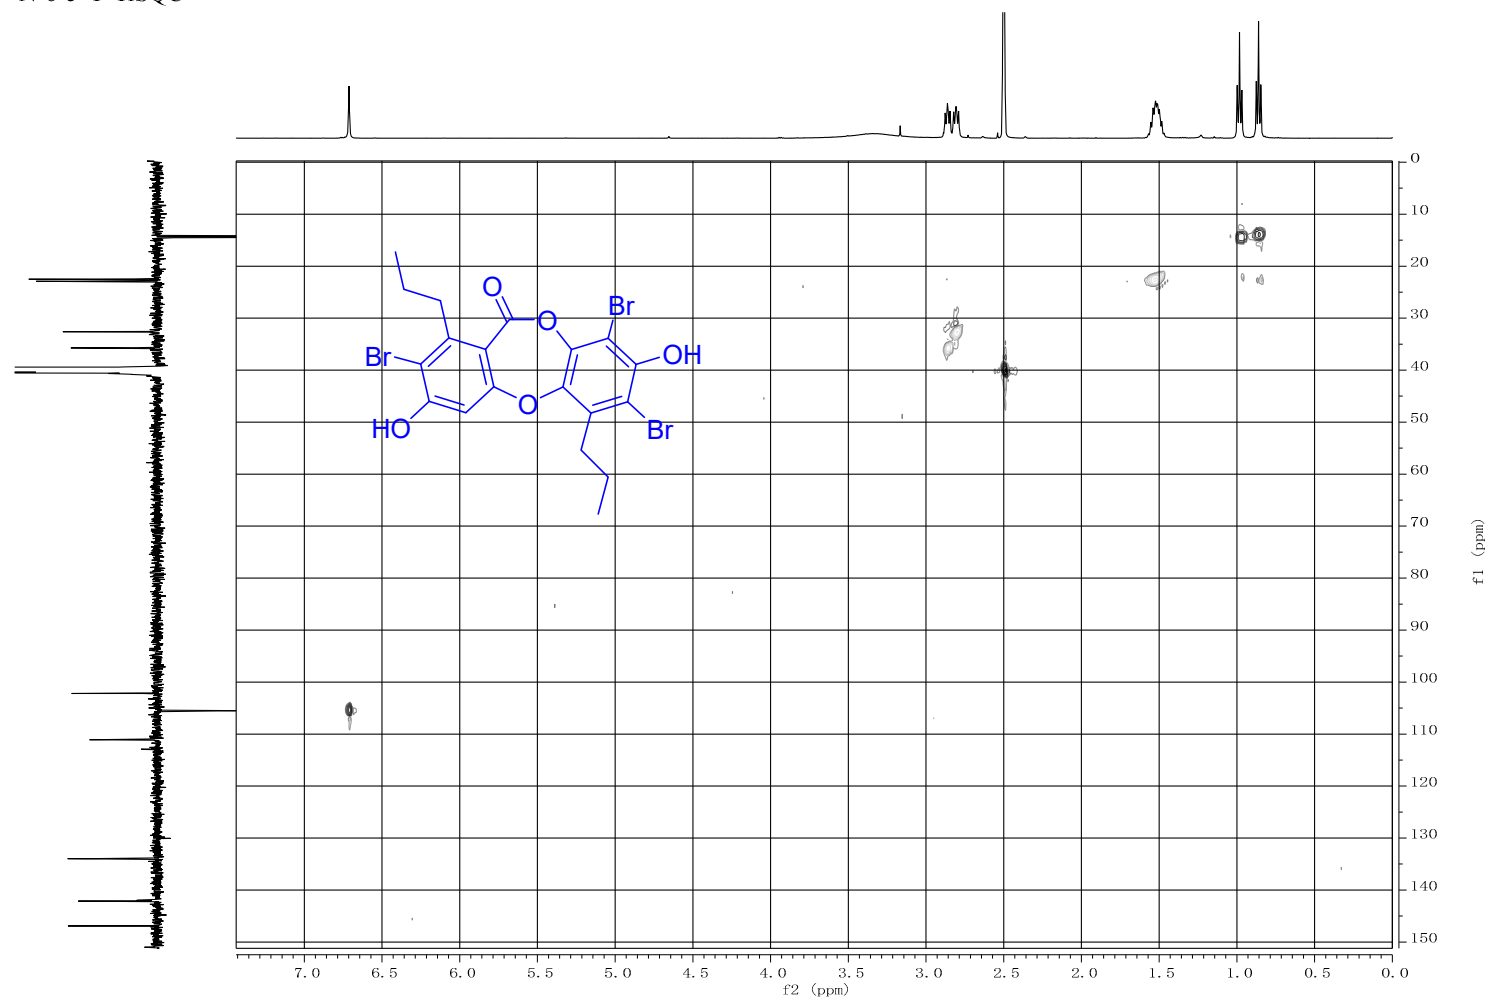

Figure S27. HSQC spectrum of **4** in DMSO-*d*<sub>6</sub>



N-6-5-Y COSY

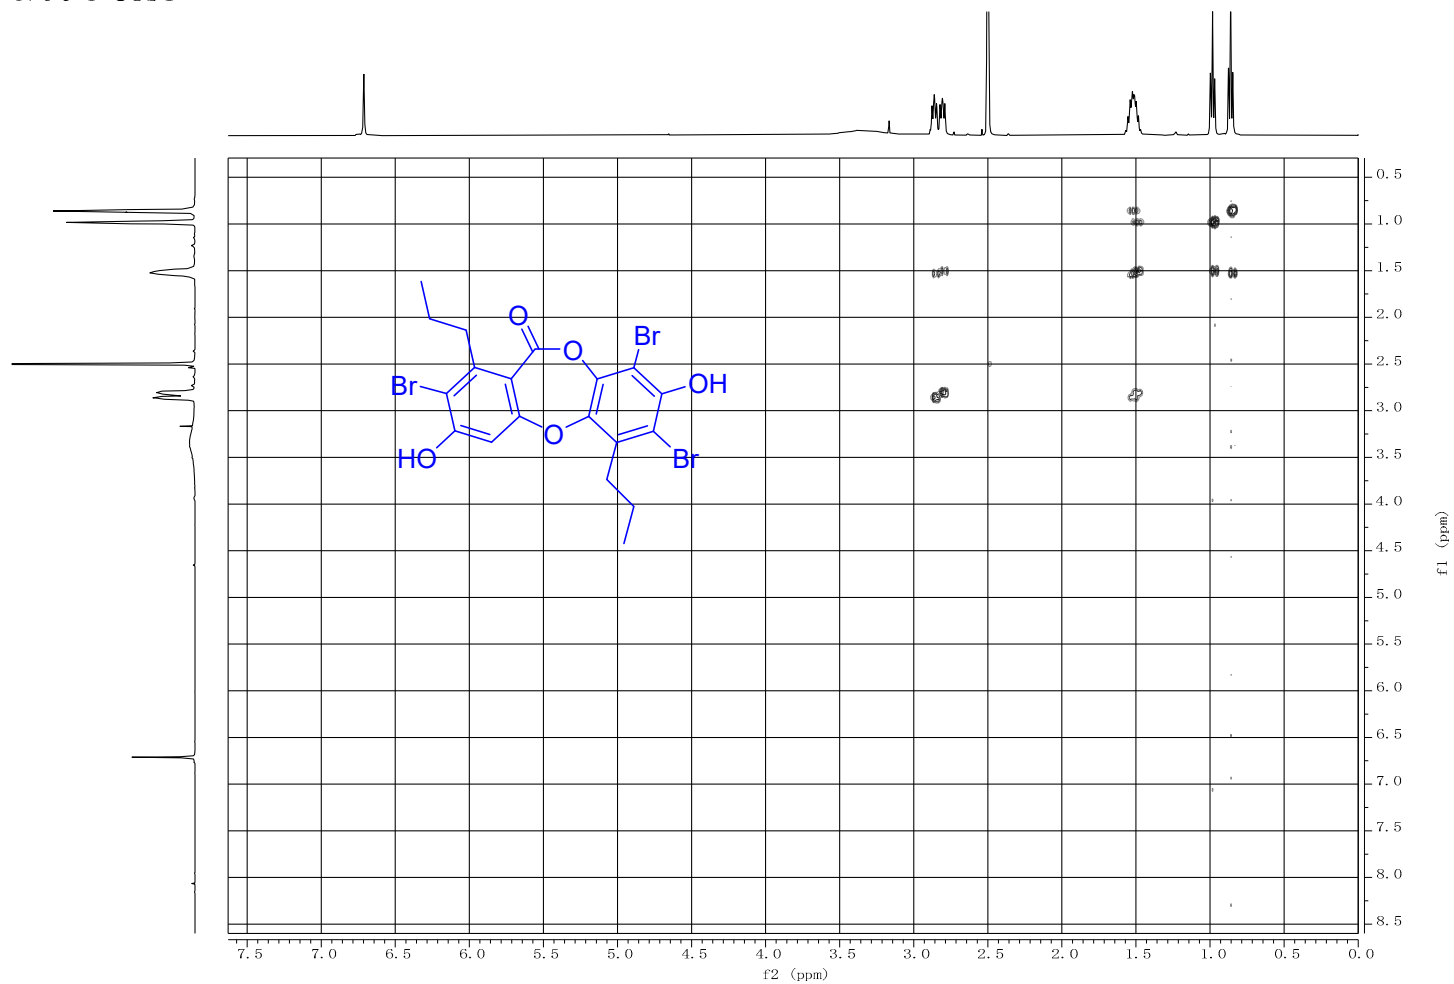

**Figure S28.**  $^1\text{H}$ - $^1\text{H}$  COSY spectrum of **4** in  $\text{DMSO}-d_6$

N-6-5-Y HMBC

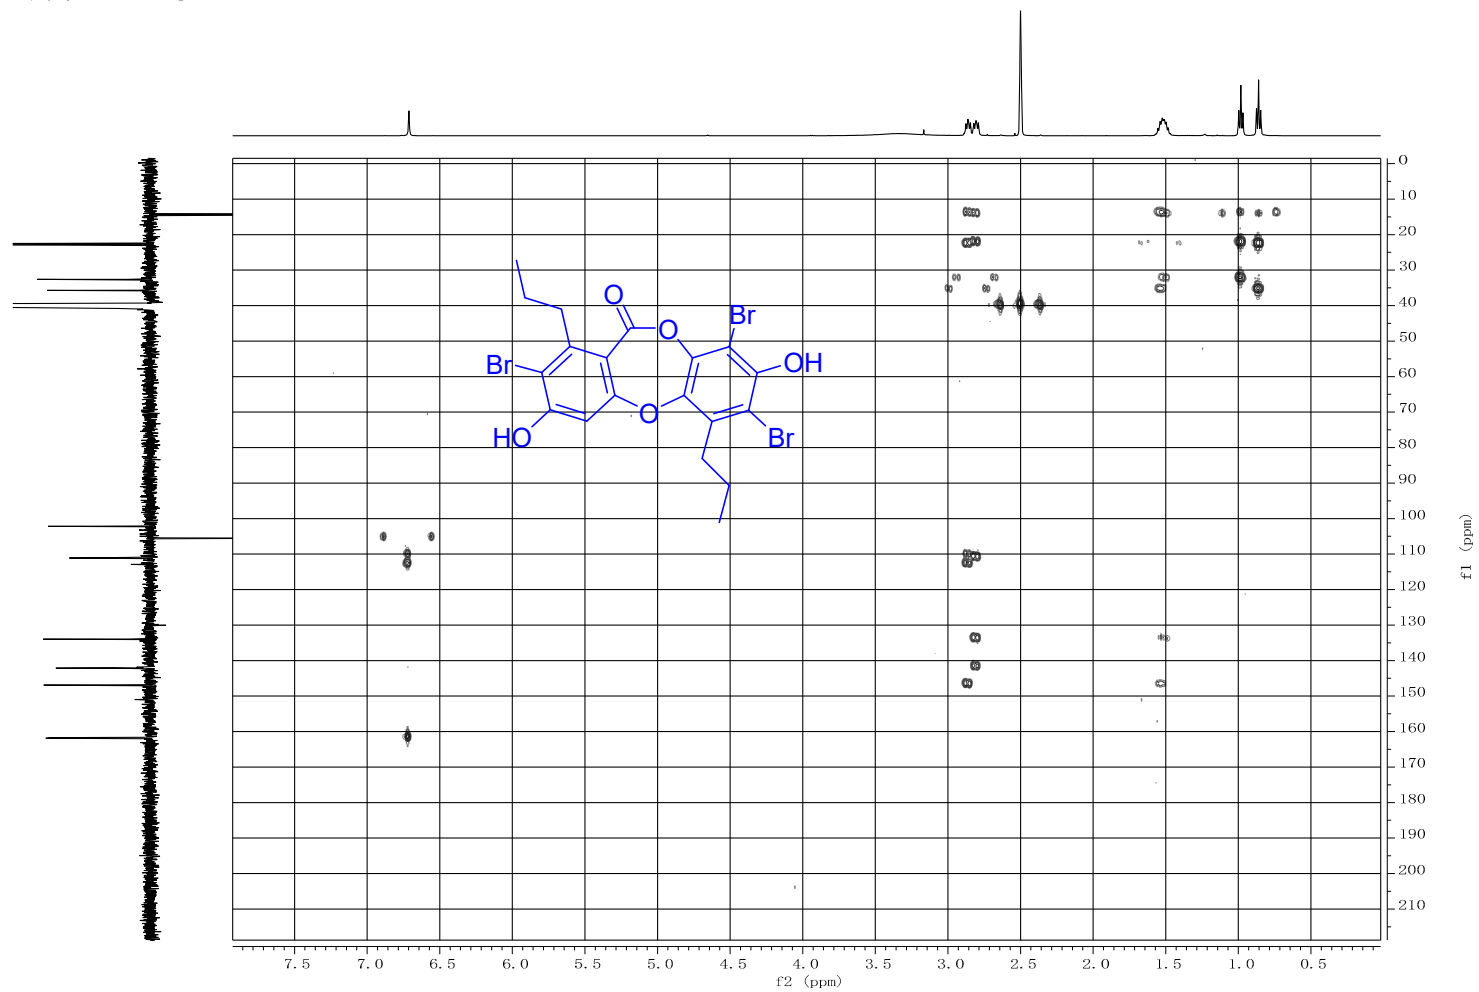

Figure S29. HMBC spectrum of **4** in DMSO-*d*<sub>6</sub>

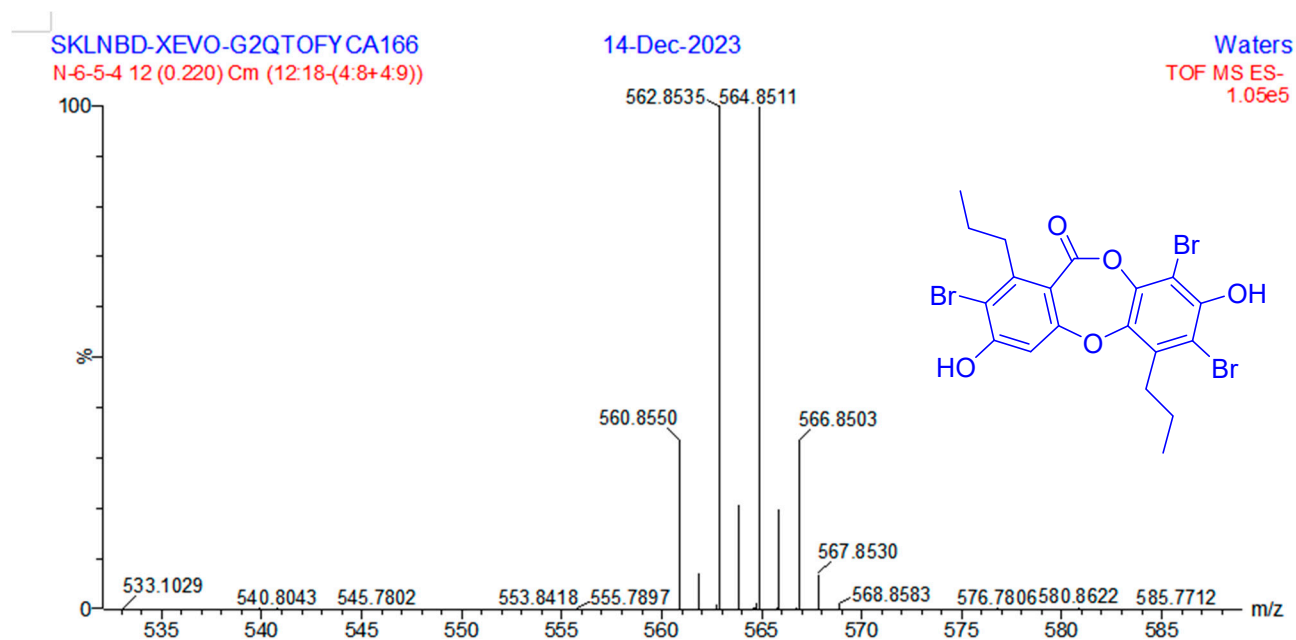

| Mass     | Calc. Mass | mDa  | PPM  | DBE  | i-FIT | Norm   | Conf(%) | Formula                                                        |
|----------|------------|------|------|------|-------|--------|---------|----------------------------------------------------------------|
| 560.8550 | 560.8551   | -0.1 | -0.2 | 30.5 | 253.8 | 14.560 | 0.00    | C <sub>32</sub> H <sub>3</sub> O Br <sub>2</sub>               |
|          | 560.8548   | 0.2  | 0.4  | 10.5 | 239.2 | 0.000  | 100.00  | C <sub>19</sub> H <sub>16</sub> O <sub>5</sub> Br <sub>3</sub> |
|          | 560.8574   | -2.4 | -4.3 | -0.5 | 254.7 | 15.479 | 0.00    | C <sub>7</sub> H <sub>15</sub> O <sub>19</sub> Br <sub>2</sub> |
|          | 560.8577   | -2.7 | -4.8 | 19.5 | 258.7 | 19.441 | 0.00    | C <sub>20</sub> H <sub>2</sub> O <sub>15</sub> Br              |

**Figure S30.** HRESIMS spectrum of **4**

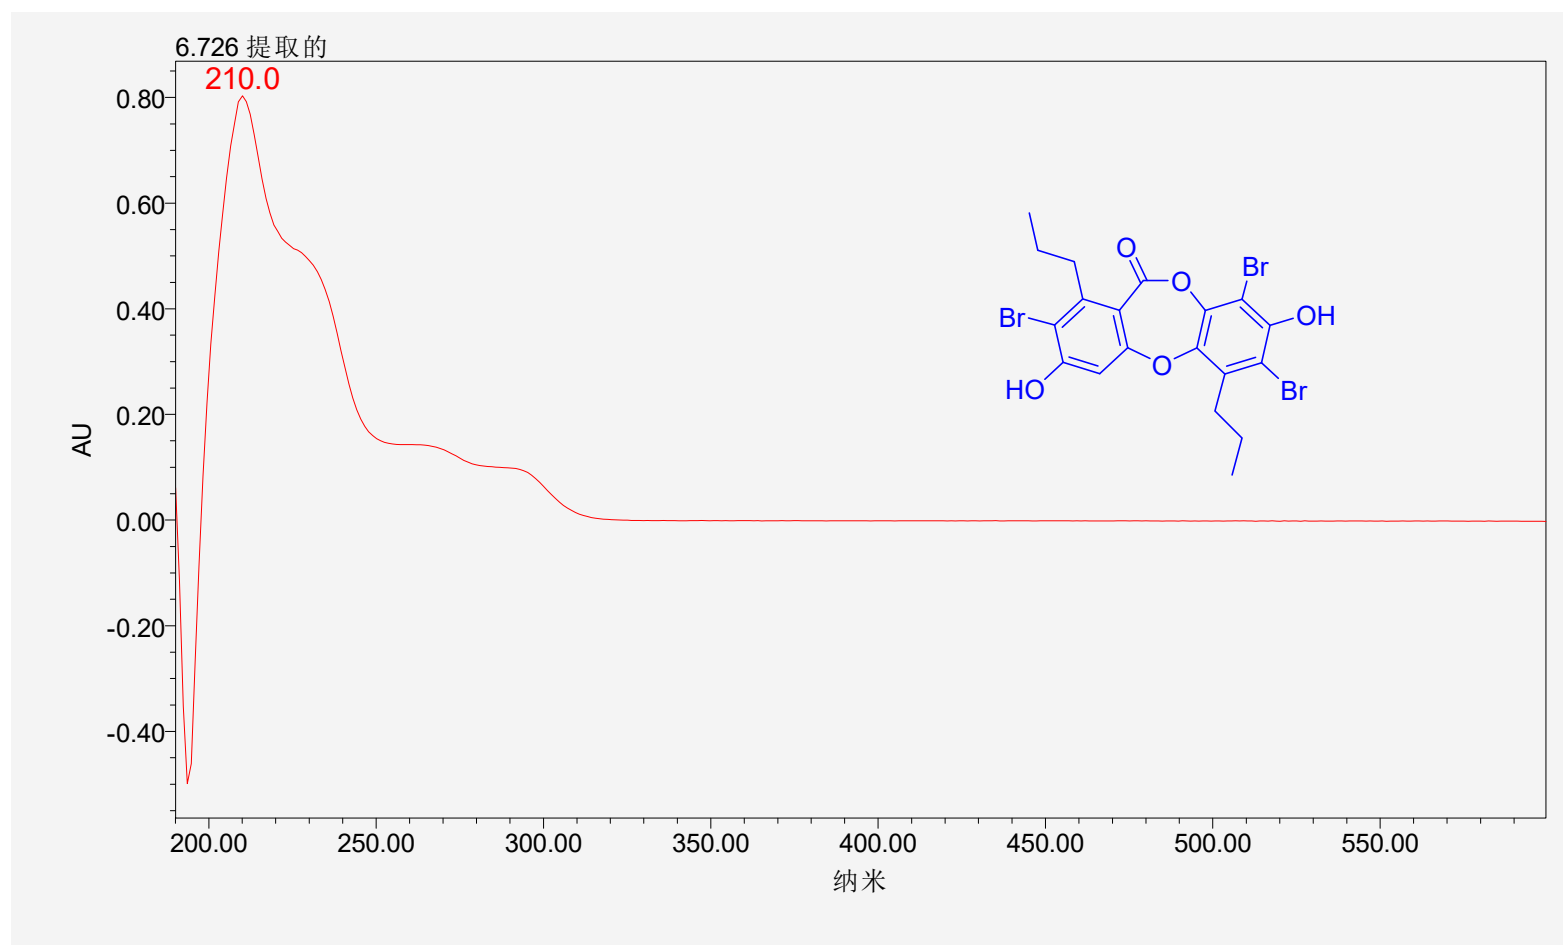

**Figure S31.** UV spectrum of **4**

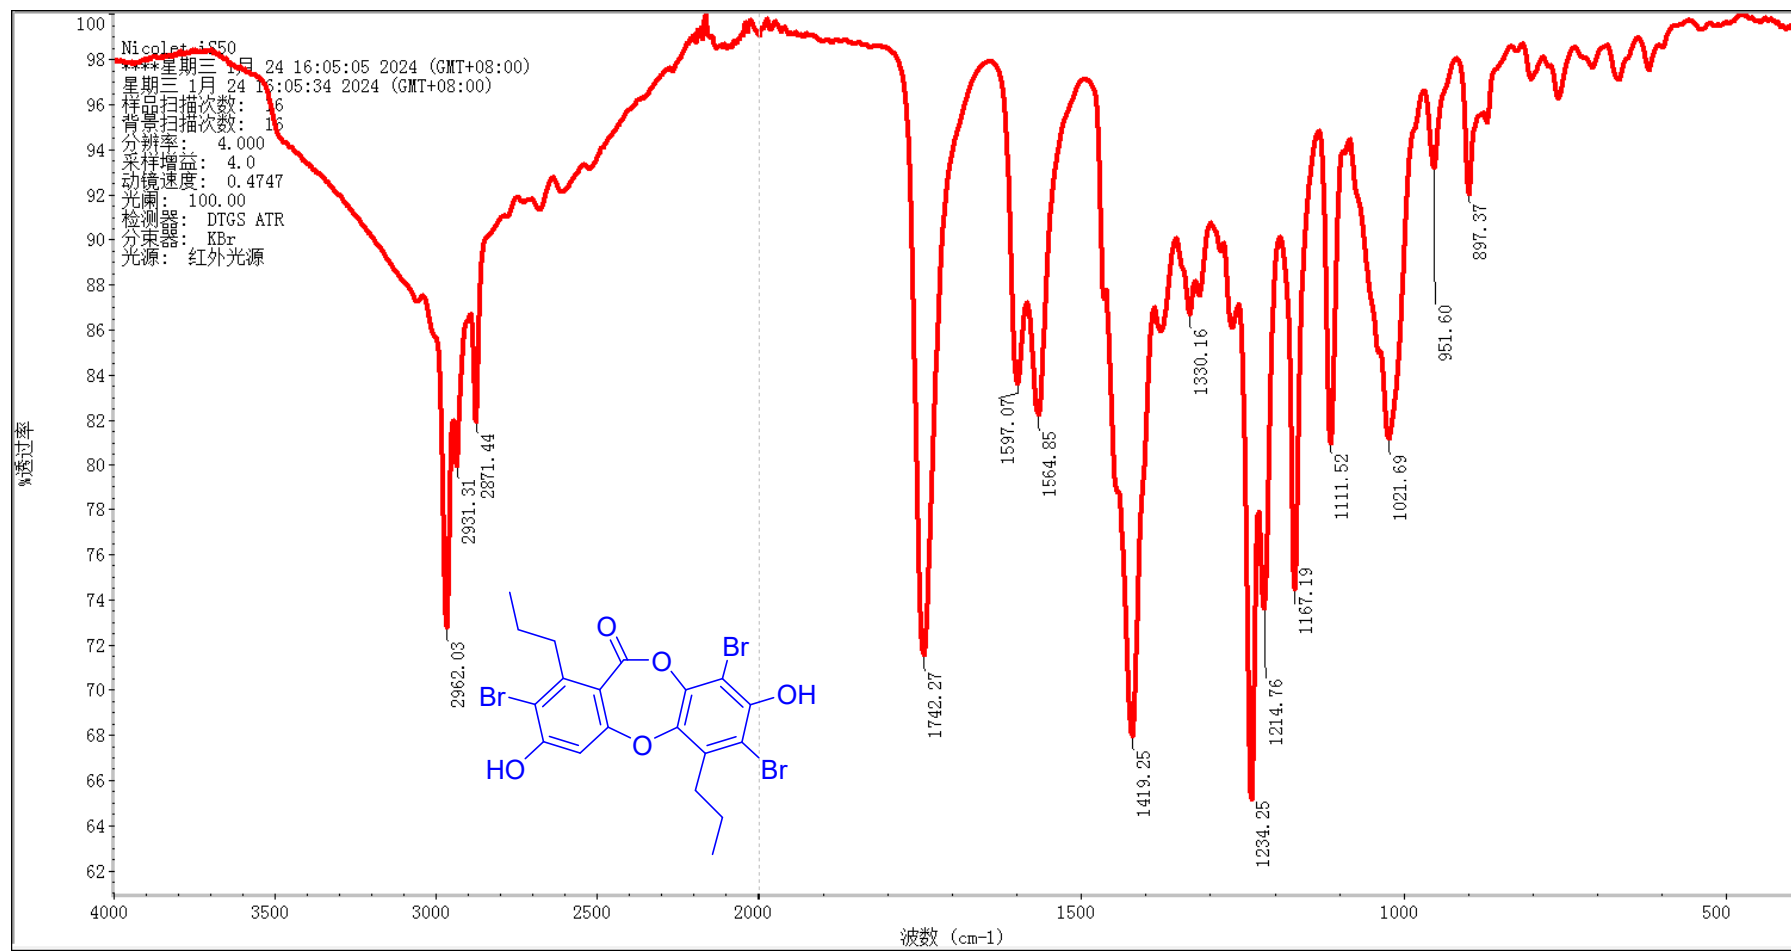

Figure S32. IR spectrum of 4

**Table S5. <sup>1</sup>H and <sup>13</sup>C NMR data and key COSY and HMBC correlations of 5**

| No. | $\delta_{\text{H}}$ | $\delta_{\text{C}}$   | COSY | HMBC                         |
|-----|---------------------|-----------------------|------|------------------------------|
| 1   |                     | 113.6, C              |      |                              |
| 2   |                     | 159.3, C              |      |                              |
| 3   |                     | 101.3, C              |      |                              |
| 4   |                     | 159.3, C              |      |                              |
| 5   |                     | 112.8, C              |      |                              |
| 6   |                     | 145.8, C              |      |                              |
| 7   |                     | 162.0, C              |      |                              |
| 8   | 3.11, t (8.0)       | 36.9, CH <sub>2</sub> |      | C-1, C-5, C-6, C-9, C-10     |
| 9   | 1.59, m             | 22.9, CH <sub>2</sub> |      | C-6, C-8, C-10               |
| 10  | 0.88, t (7.3)       | 14.3, CH <sub>3</sub> |      | C-8, C-9                     |
| 1'  |                     | 142.0, C              |      |                              |
| 2'  |                     | 143.4, C              |      |                              |
| 3'  | 6.80, s             | 105.6, C              |      | C-1, C-2, C-4, C-5           |
| 4'  |                     | 153.0, C              |      |                              |
| 5'  |                     | 108.9, C              |      |                              |
| 6'  |                     | 135.9, C              |      |                              |
| 7'  | 2.76, t (7.8)       | 33.0, CH <sub>2</sub> |      | C-1', C-5', C-6', C-8', C-9' |
| 8'  | 1.48, m             | 23.1, CH <sub>2</sub> |      | C-6', C-7', C-9'             |
| 9'  | 1.01, t (7.3)       | 14.4, CH <sub>3</sub> |      | C-7', C-8'                   |

N-6-6 500 MHz DMSO

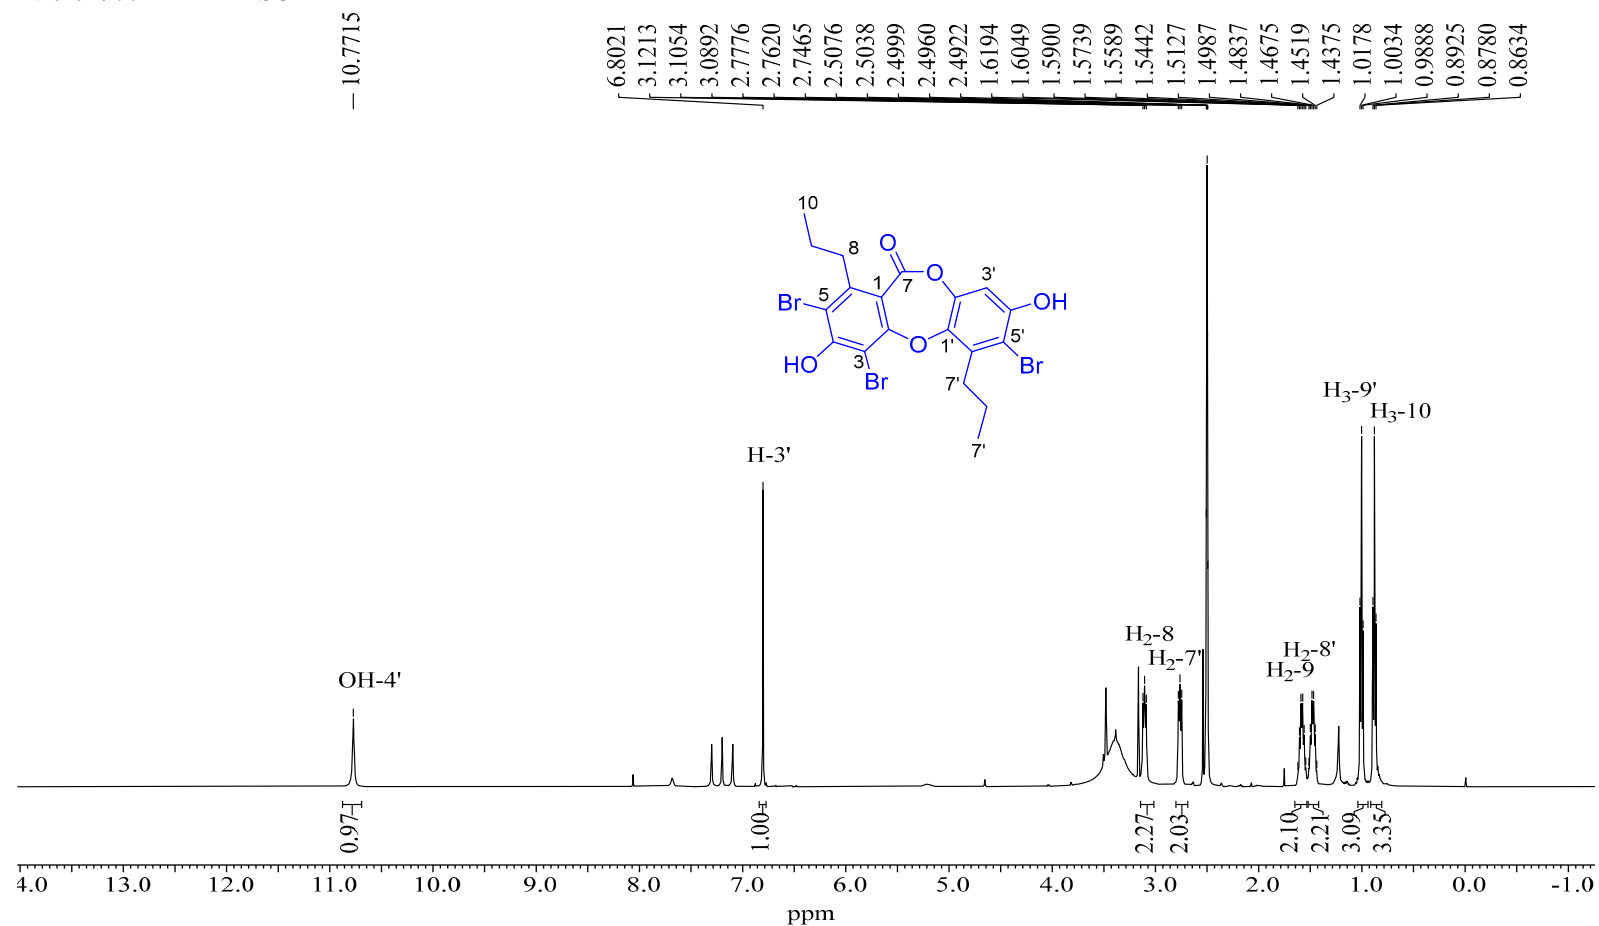

Figure S33. <sup>1</sup>H-NMR spectrum of **5** in DMSO-*d*<sub>6</sub> (500 MHz)

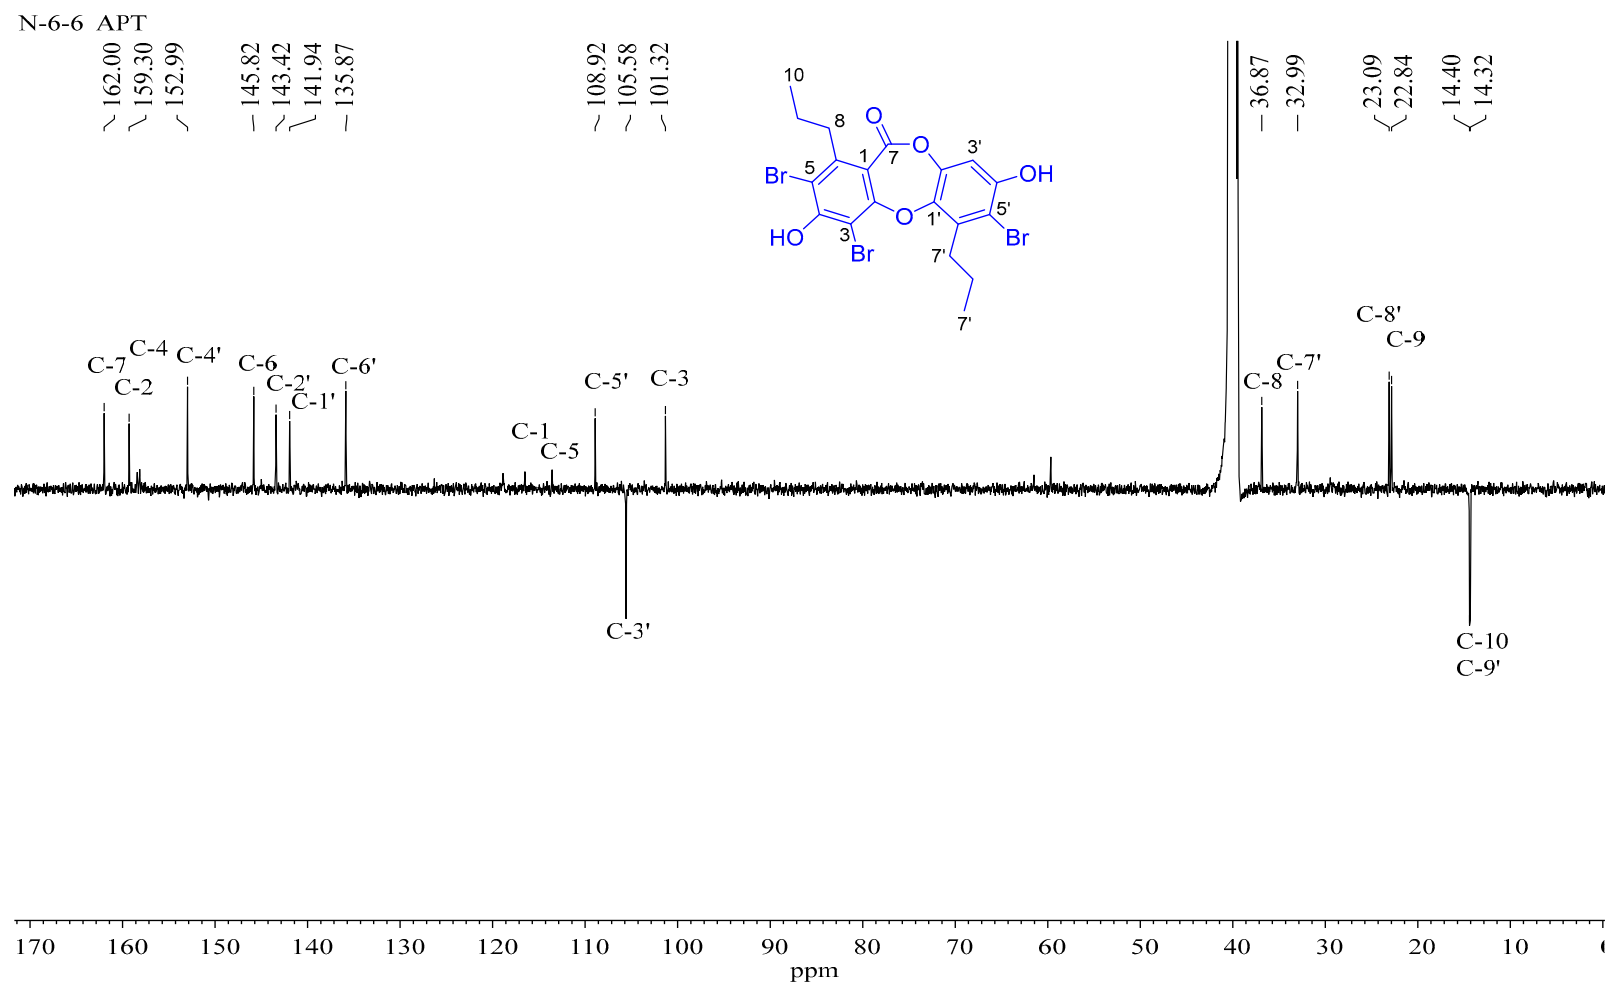

**Figure S34.** APT spectrum of **5** in DMSO-*d*<sub>6</sub> (125 MHz)



N-6-6 HSQC

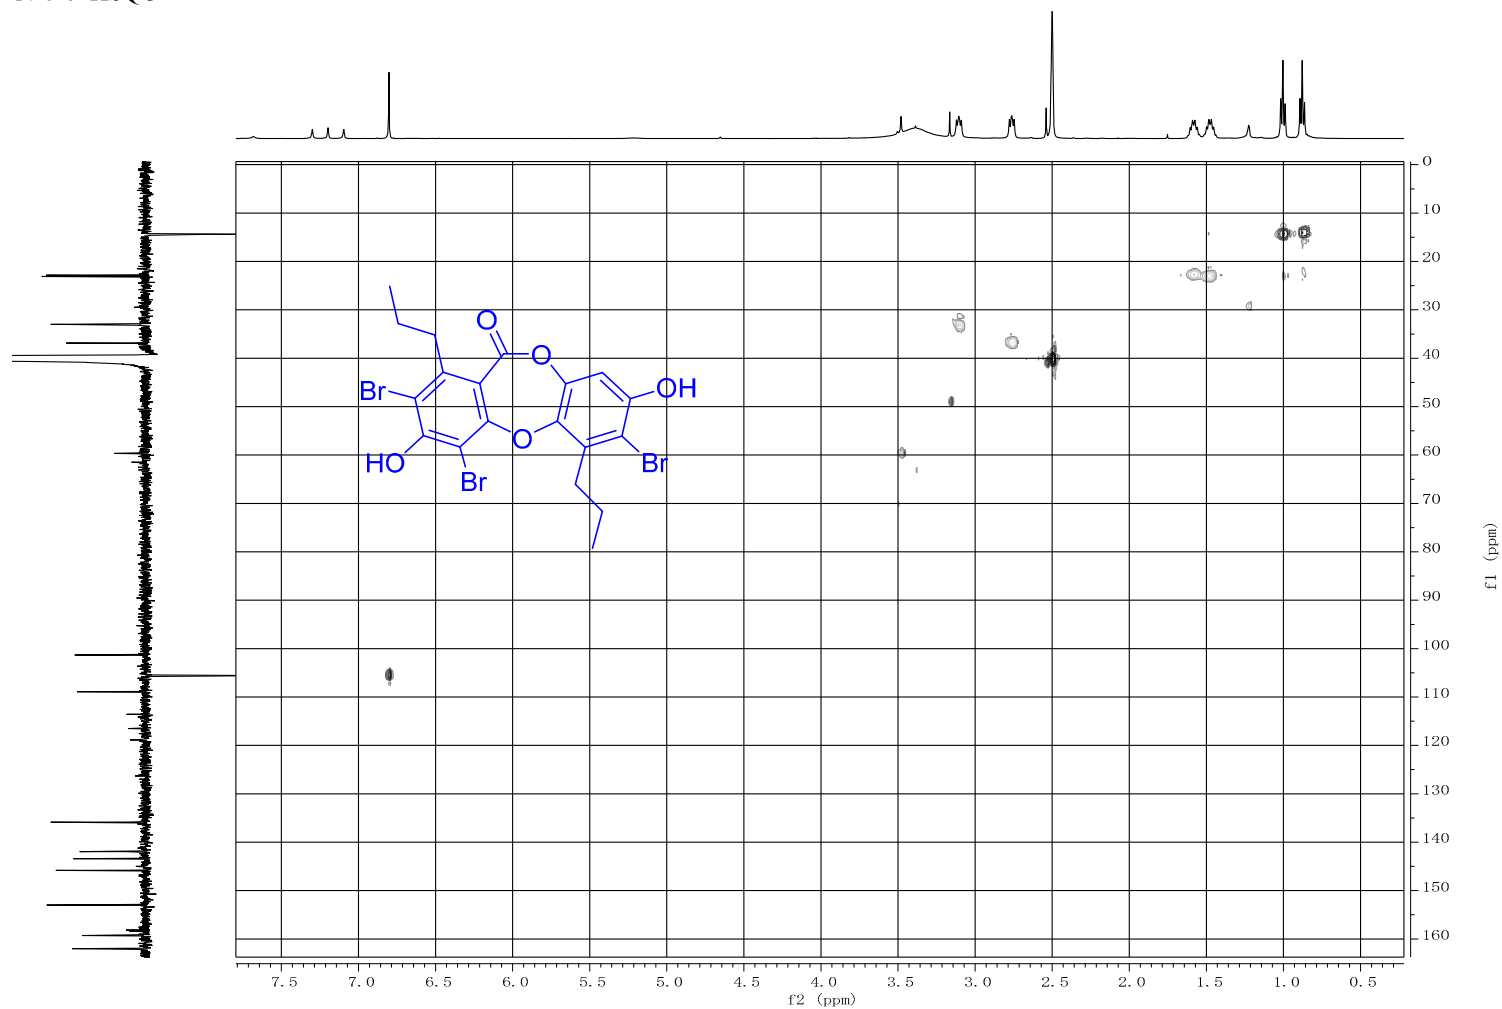

**Figure S35.** HSQC spectrum of **5** in DMSO-*d*<sub>6</sub>

N-6-6 COSY

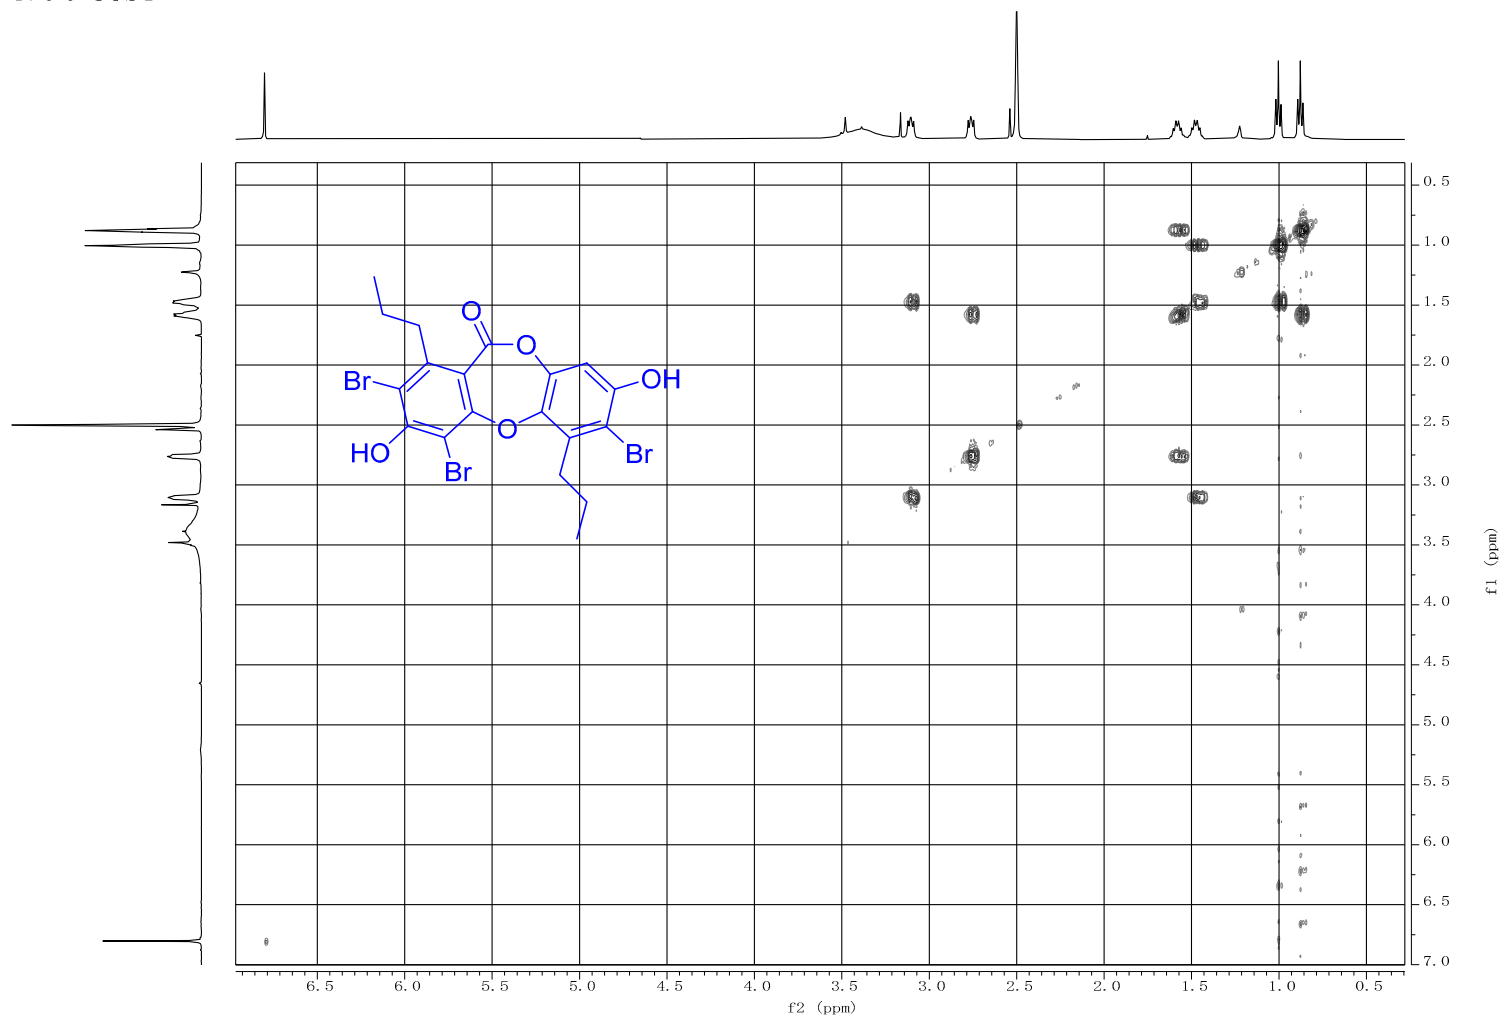

**Figure S36.**  $^1\text{H}$ - $^1\text{H}$  COSY spectrum of **5** in  $\text{DMSO}-d_6$

N-6-6 HMBC

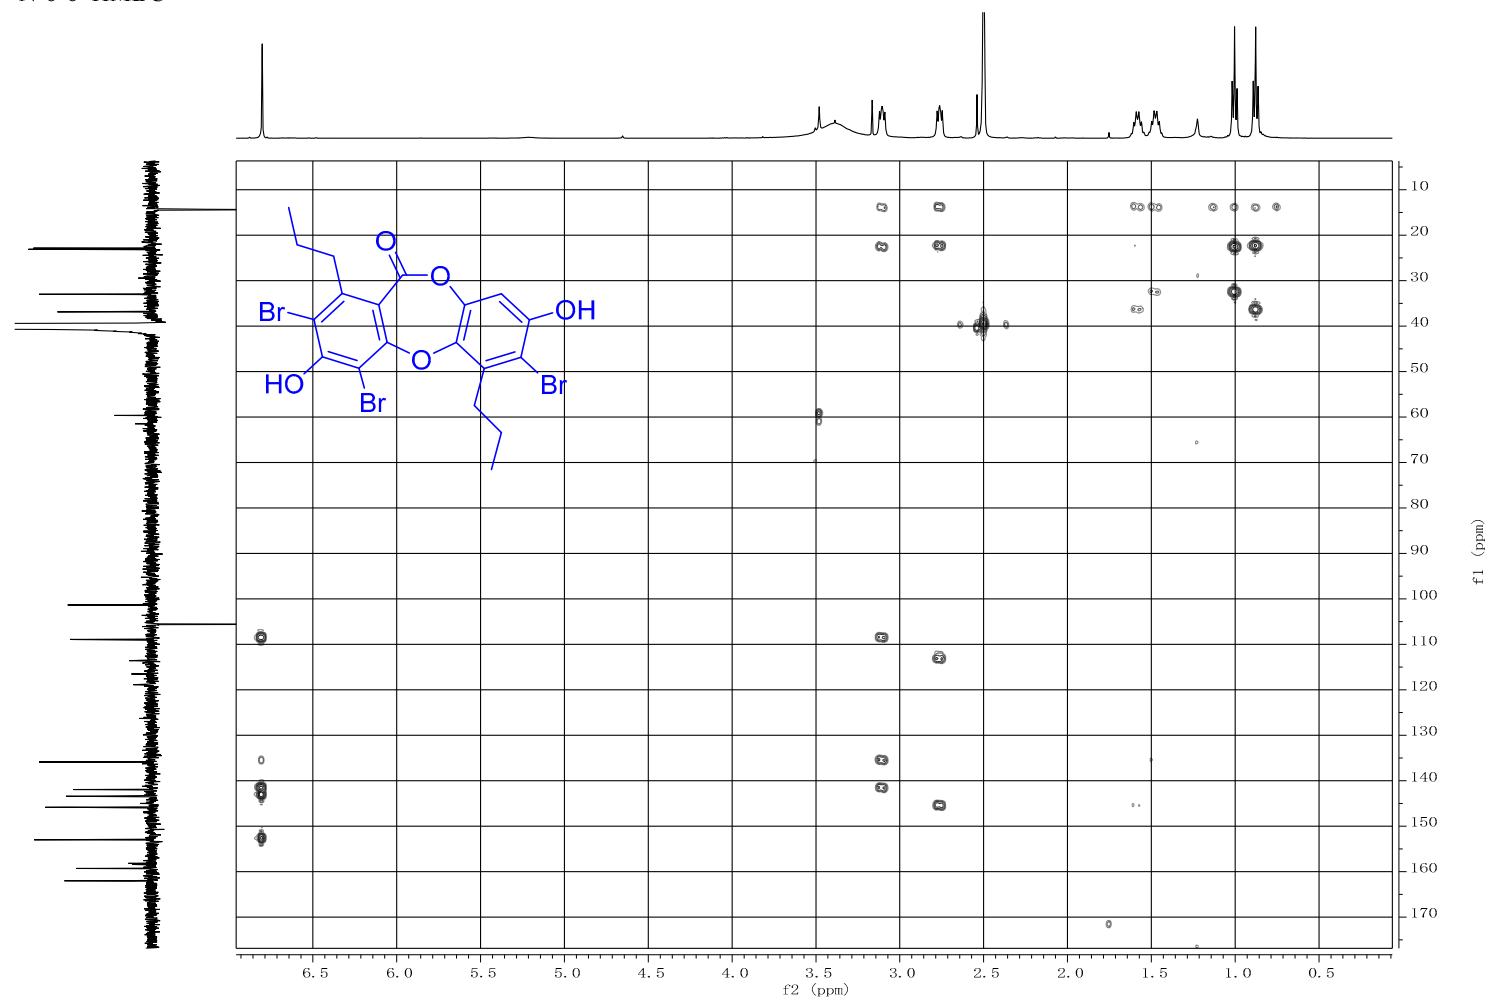

**Figure S37.** HMBC spectrum of **5** in  $\text{DMSO-}d_6$

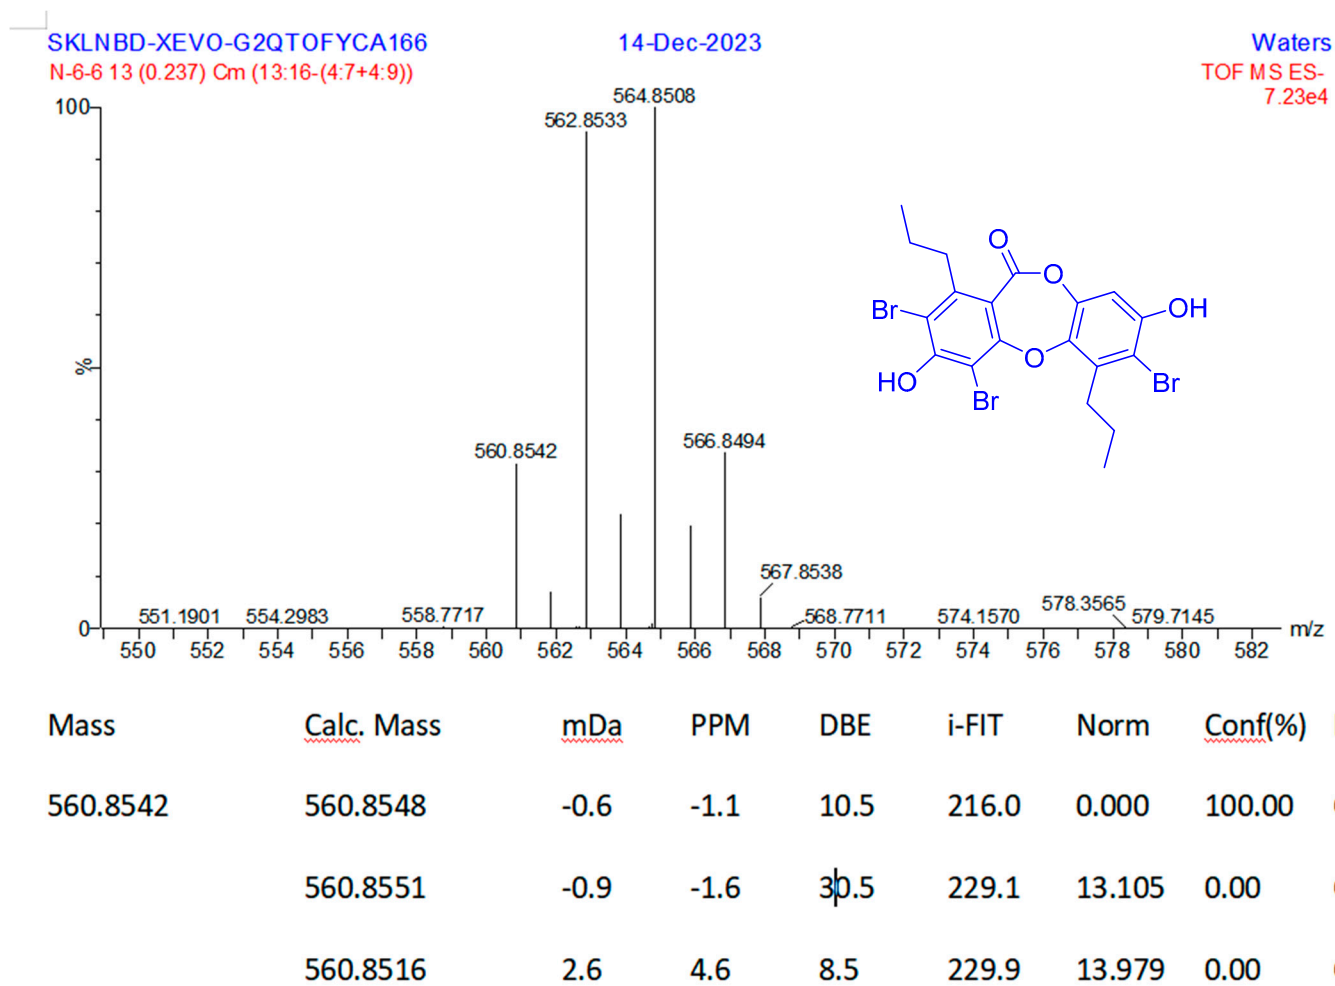

**Figure S38.** HRESIMS spectrum of **5**

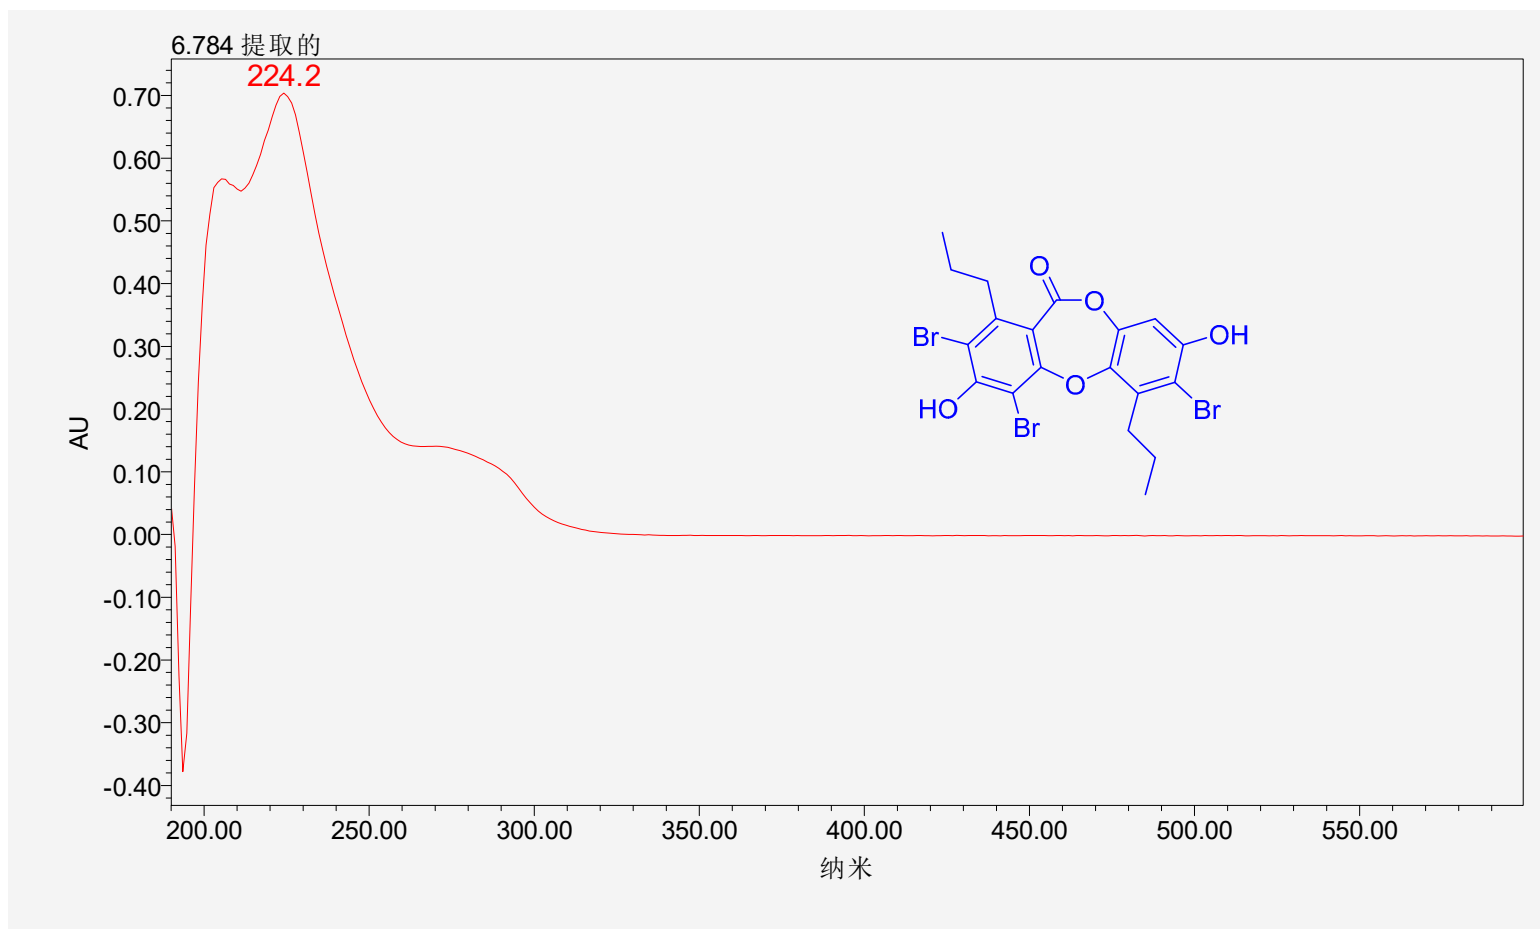

**Figure S39.** UV spectrum of **5**

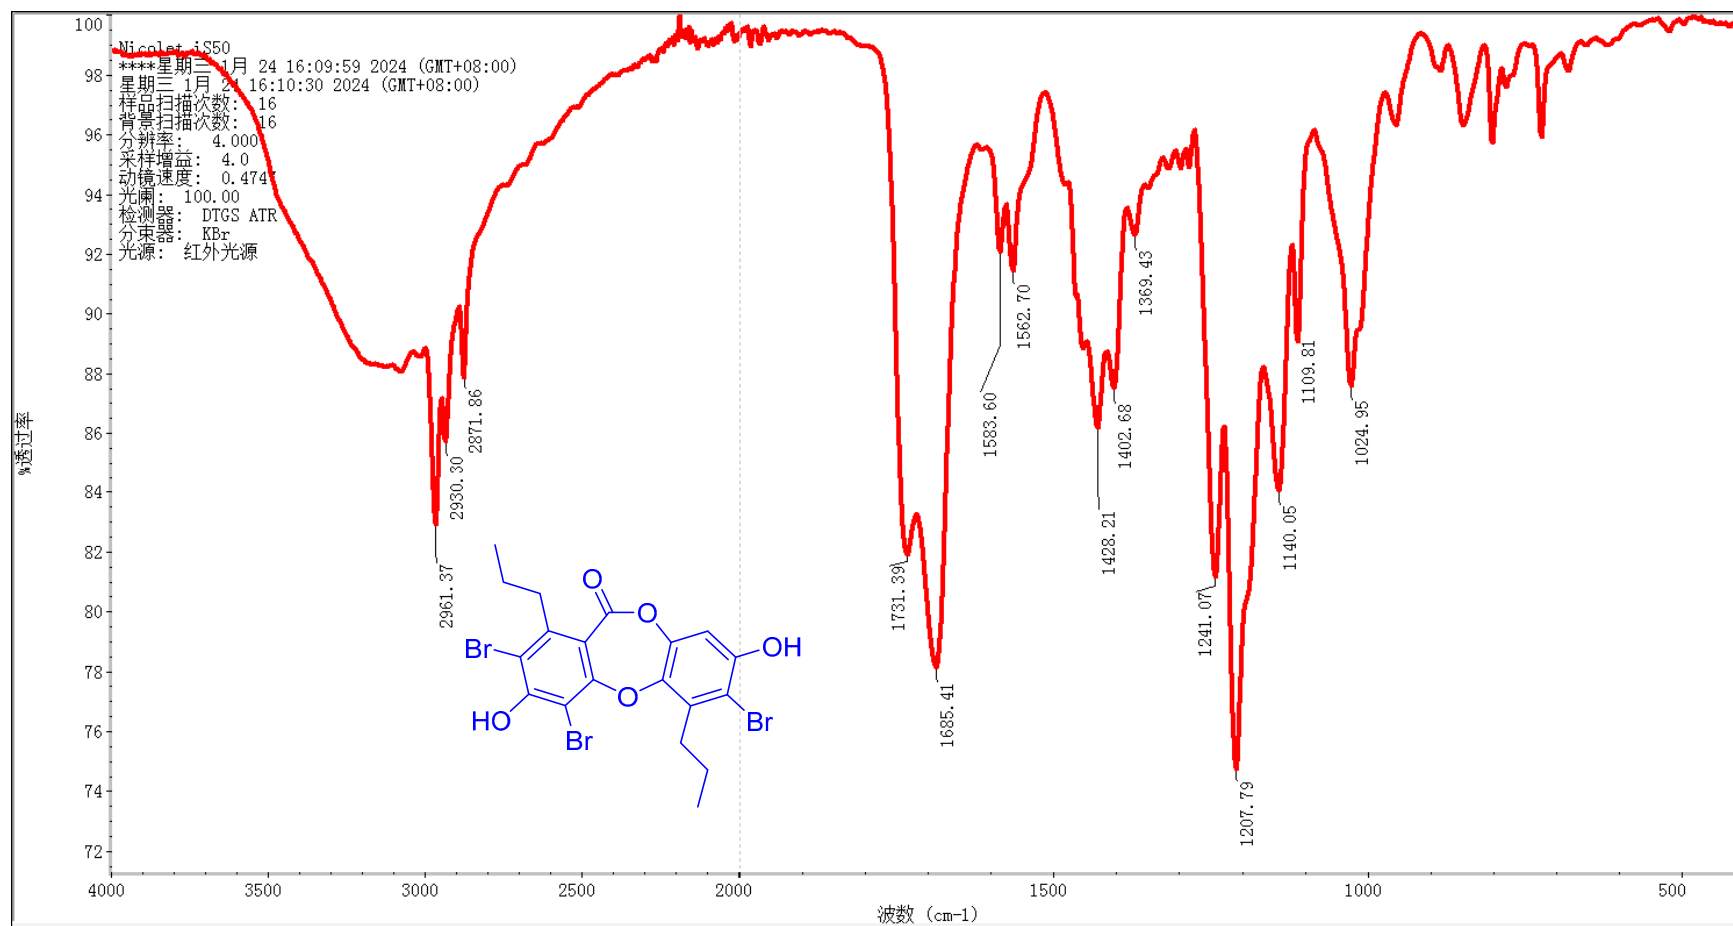

Figure S40. IR spectrum of **5**

**Table S6. <sup>1</sup>H and <sup>13</sup>C NMR data and key COSY and HMBC correlations of 6**

| No. | $\delta_{\text{H}}$ | $\delta_{\text{C}}$   | COSY | HMBC                         |
|-----|---------------------|-----------------------|------|------------------------------|
| 1   |                     | 113.2, C              |      |                              |
| 2   |                     | 159.2, C              |      |                              |
| 3   |                     | 101.3, C              |      |                              |
| 4   |                     | 159.2, C              |      |                              |
| 5   |                     | 114.1, C              |      |                              |
| 6   |                     | 146.1, C              |      |                              |
| 7   |                     | 161.7, C              |      |                              |
| 8   | 2.78, t (7.9)       | 27.1, CH <sub>2</sub> |      | C-1, C-5, C-6, C-9, C-10     |
| 9   | 1.47, m             | 23.1, CH <sub>2</sub> |      | C-6, C-8, C-10               |
| 10  | 0.90, t (7.3)       | 14.4, CH <sub>3</sub> |      | C-8, C-9                     |
| 1'  |                     | 143.0, C              |      |                              |
| 2'  |                     | 143.7, C              |      |                              |
| 3'  | 7.12, s             | 103.5, CH             |      | C-1, C-2, C-4, C-5           |
| 4'  |                     | 154.4, C              |      |                              |
| 5'  |                     | 110.0, C              |      |                              |
| 6'  |                     | 136.1, C              |      |                              |
| 7'  | 3.14, t (7.5)       | 33.0, CH <sub>2</sub> |      | C-1', C-5', C-6', C-8', C-9' |
| 8'  | 1.61, m             | 22.9, CH <sub>2</sub> |      | C-6', C-7', C-9'             |
| 9'  | 1.01, t (7.3)       | 14.4, CH <sub>3</sub> |      | C-7', C-8'                   |
| MeO | 3.84, s             | 57.6, CH <sub>3</sub> |      | C-4'                         |

Fr.C-1 400 MHz DMSO

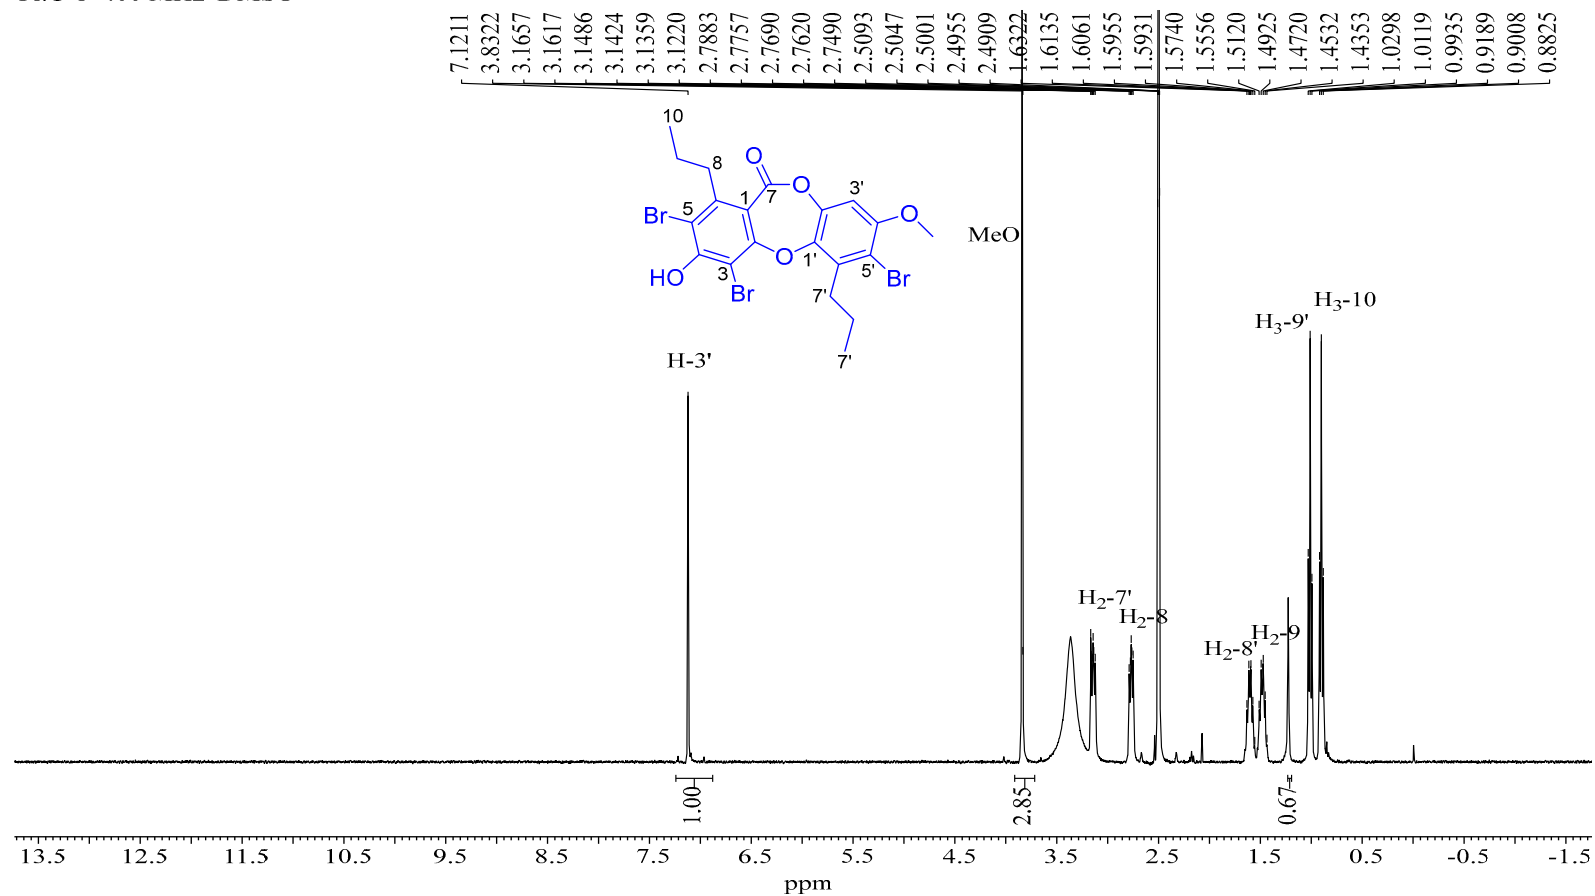

**Figure S41.** <sup>1</sup>H-NMR spectrum of **6** in DMSO-*d*<sub>6</sub> (400 MHz)



Fr.C-1 C

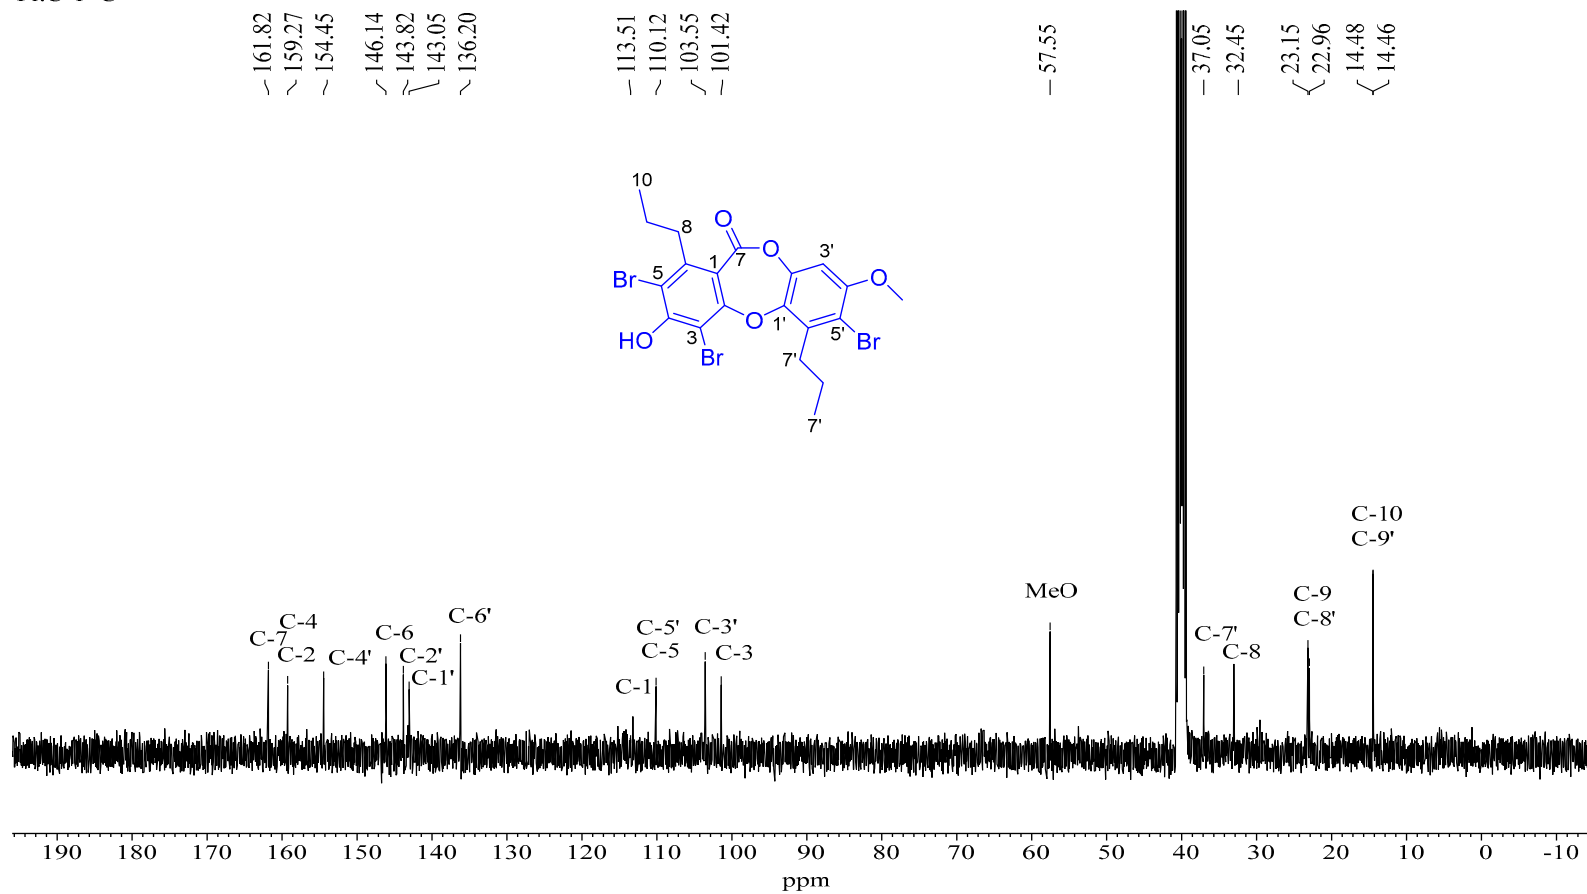

**Figure S42.**  $^{13}\text{C}$ -NMR spectrum of **6** in  $\text{DMSO-}d_6$  (100 MHz)

Fr.C-1 HSQC

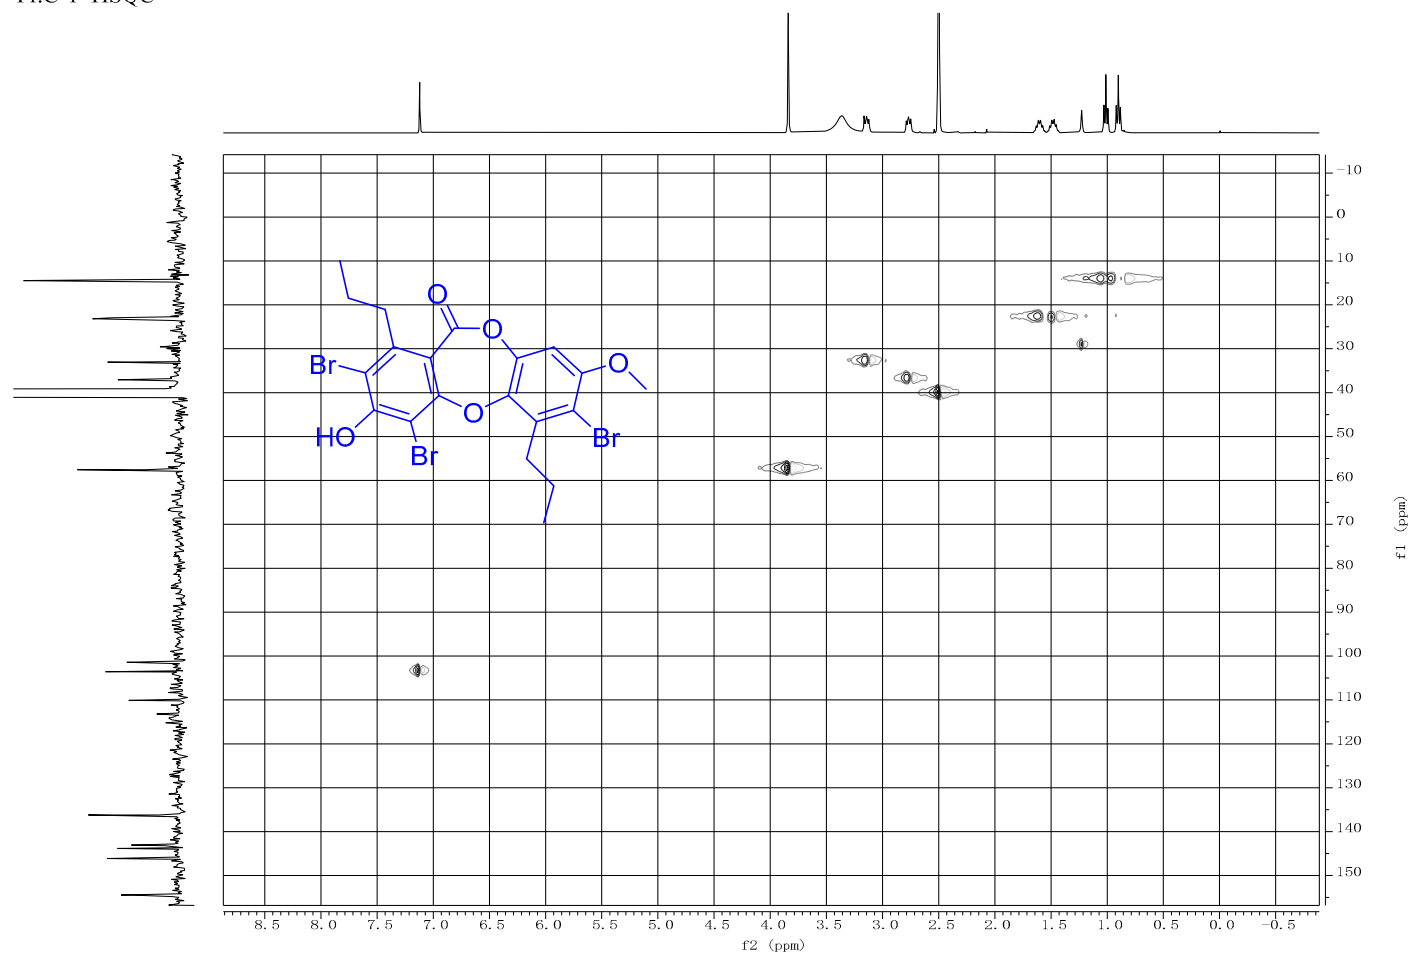

**Figure S43.** HSQC spectrum of **6** in DMSO-*d*<sub>6</sub>

Fr.C-1 COSY

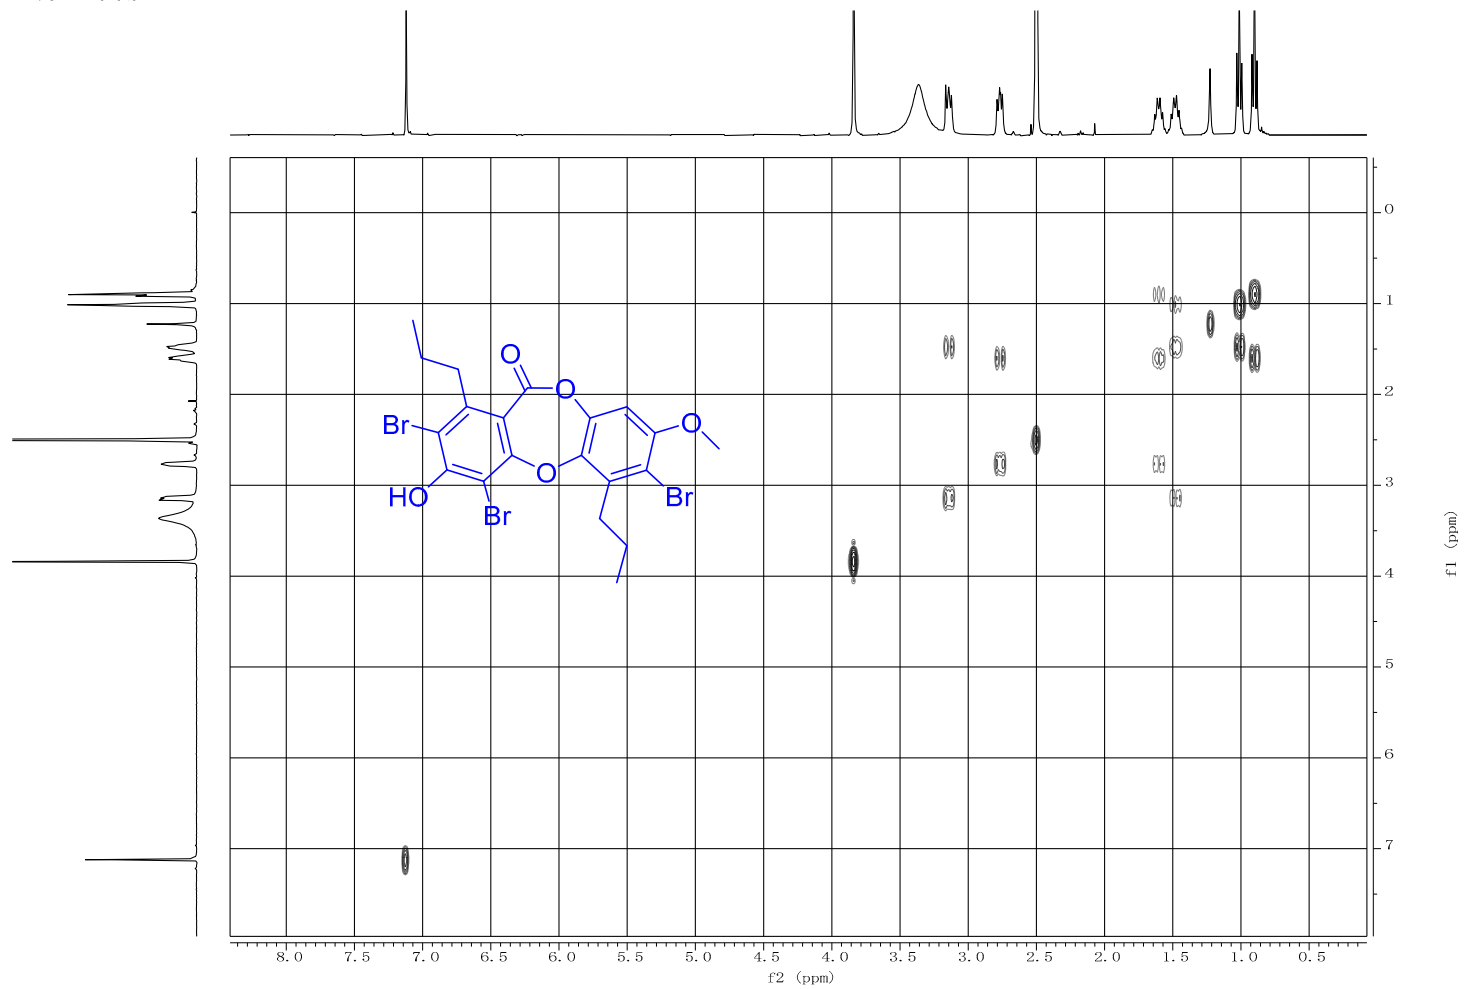

**Figure S44.**  $^1\text{H}$ - $^1\text{H}$  COSY spectrum of **6** in  $\text{DMSO-}d_6$

Fr.C-1 HMBC

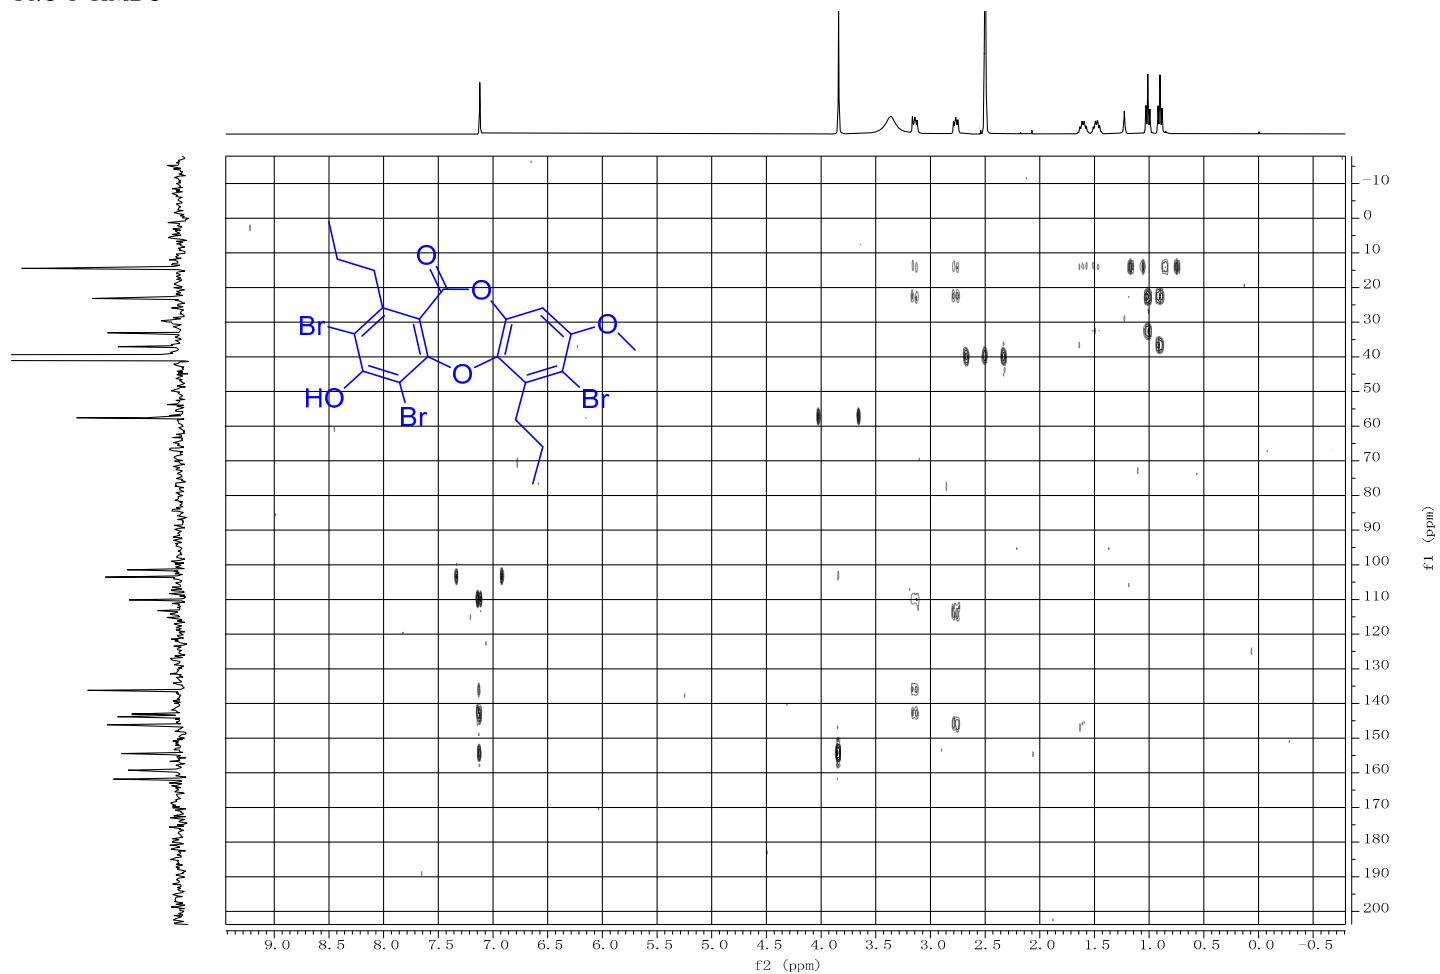

**Figure S45.** HMBC spectrum of **6** in  $\text{DMSO}-d_6$

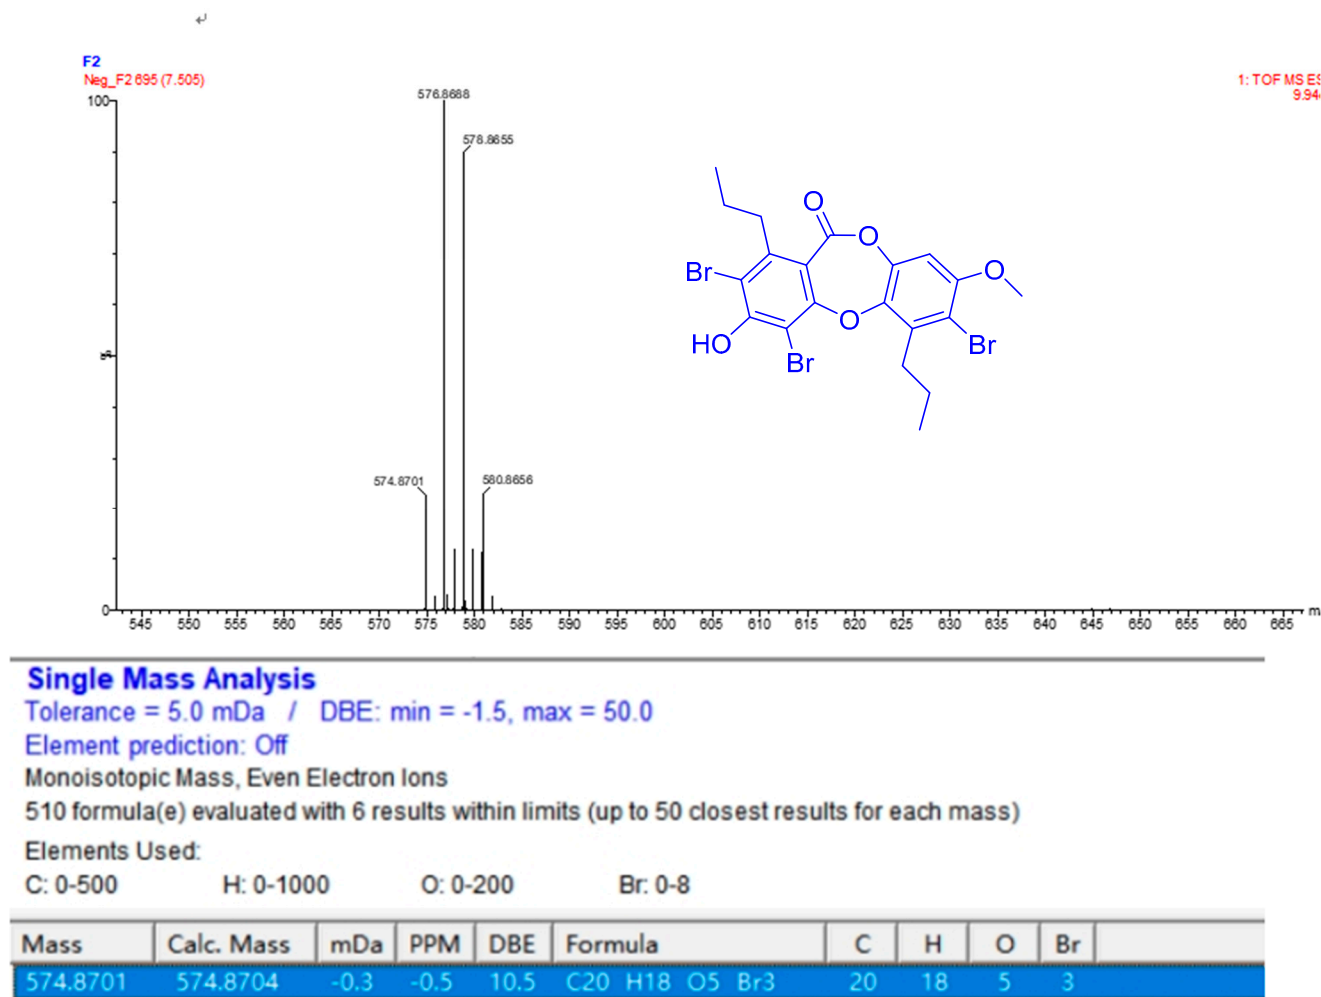

Figure S46. HRESIMS spectrum of **6**

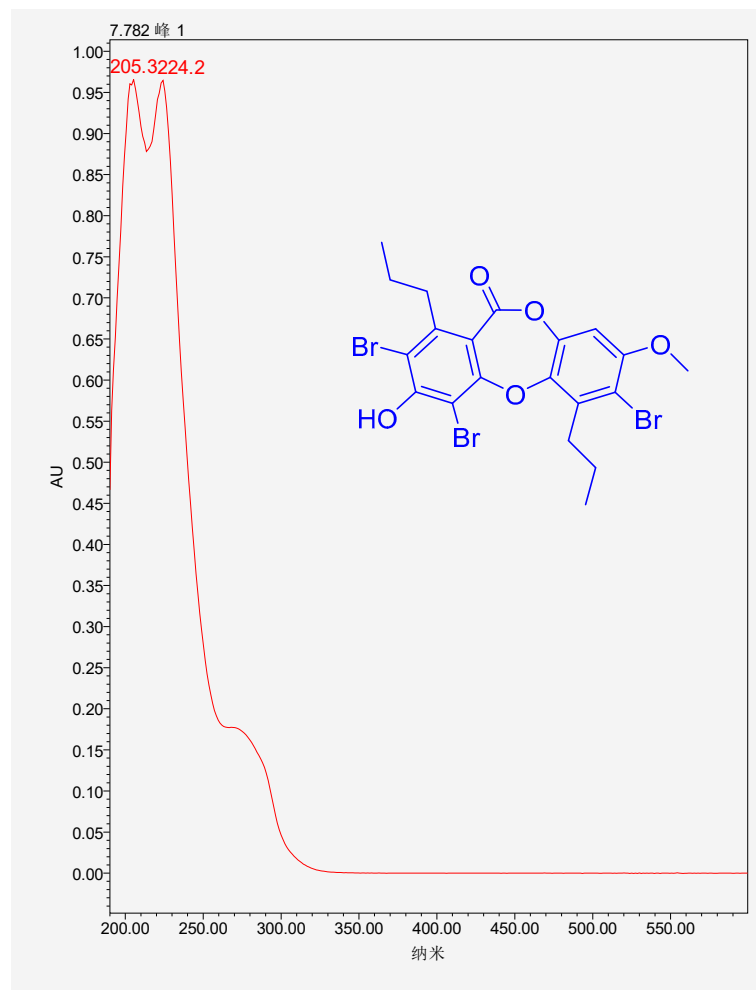

**Figure S47.** UV spectrum of **6**

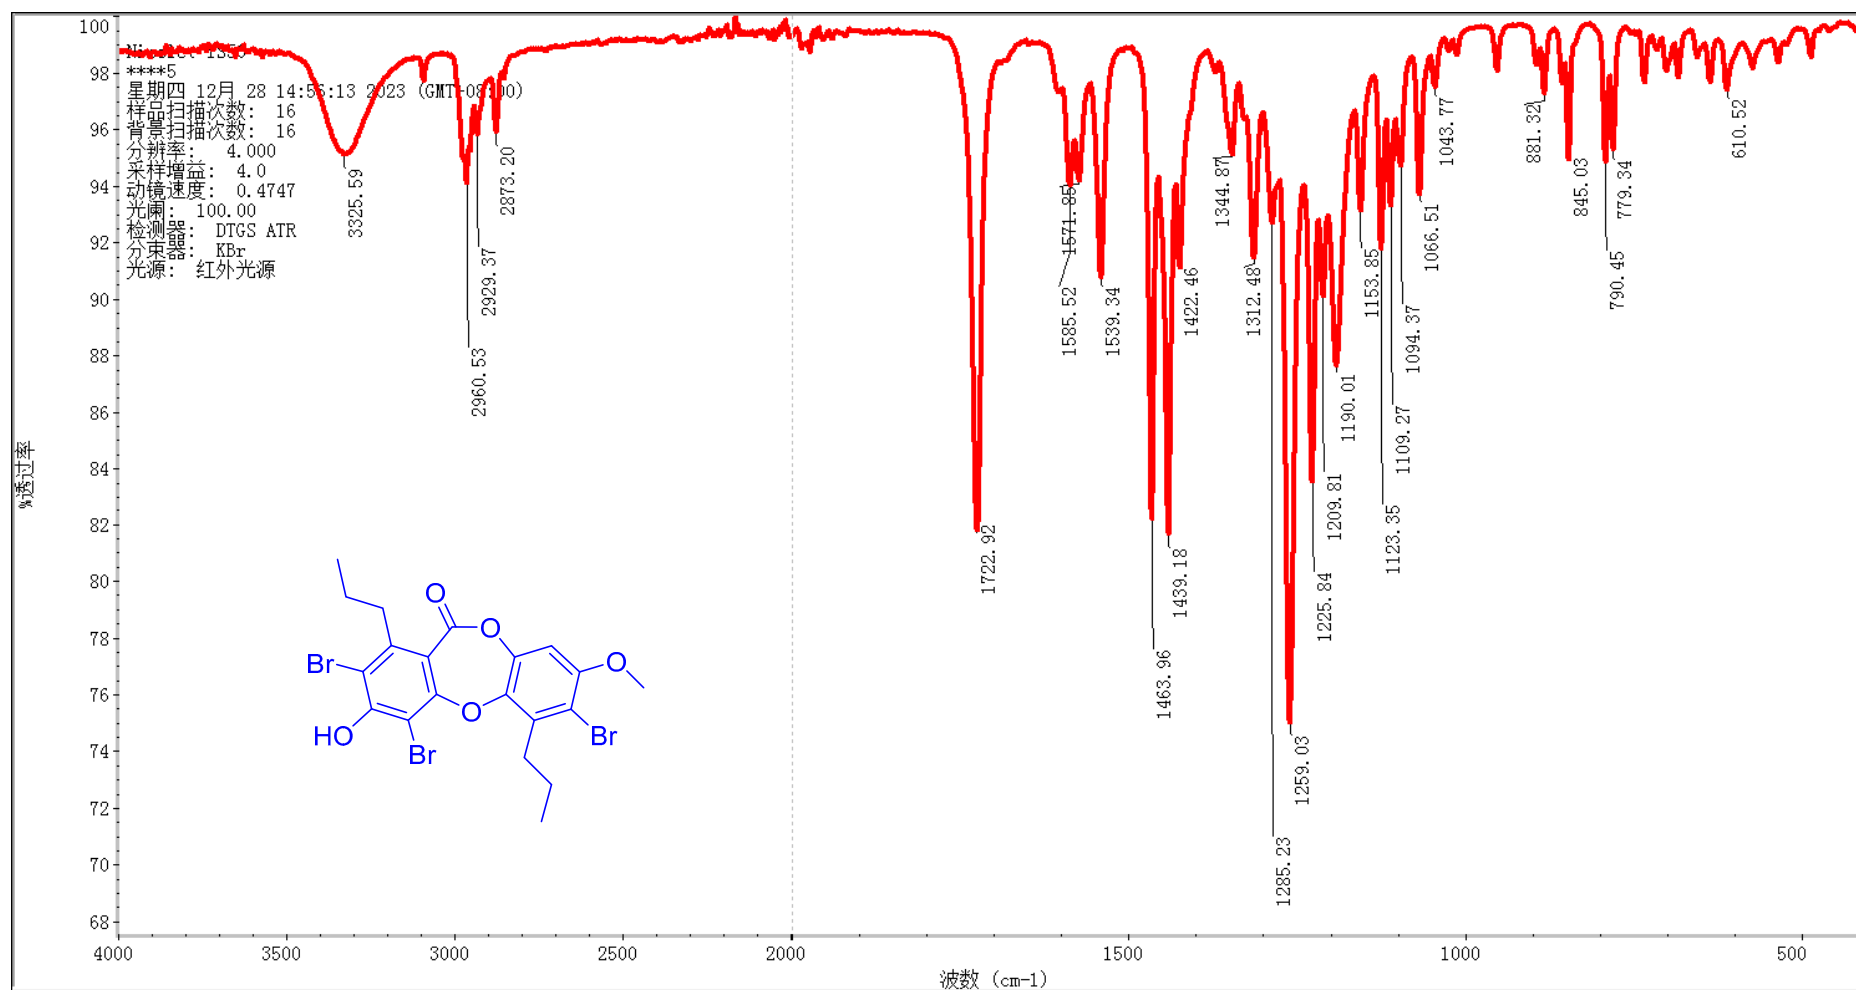

Figure S48. IR spectrum of 6

**Table S7. <sup>1</sup>H and <sup>13</sup>C NMR data and key COSY and HMBC correlations of 7**

| No. | $\delta_{\text{H}}$ | $\delta_{\text{C}}$   | COSY                                   | HMBC                         |
|-----|---------------------|-----------------------|----------------------------------------|------------------------------|
| 1   |                     | 111.5, C              |                                        |                              |
| 2   |                     | 160.2, C              |                                        |                              |
| 3   |                     | 99.2, C               |                                        |                              |
| 4   |                     | 160.0, C              |                                        |                              |
| 5   | 6.84, s             | 115.6, C              |                                        | C-1, C-3, C-4, C-8           |
| 6   |                     | 148.8, C              |                                        |                              |
| 7   |                     | 160.7, C              |                                        |                              |
| 8   | 2.68, t (7.7)       | 35.7, CH <sub>2</sub> | H <sub>2</sub> -9                      | C-1, C-5, C-6, C-9, C-10     |
| 9   | 1.48, m             | 24.5, CH <sub>2</sub> | H <sub>2</sub> -8, H <sub>3</sub> -10  | C-6, C-8, C-10               |
| 10  | 0.83, t (7.3)       | 14.2, CH <sub>3</sub> | H <sub>2</sub> -9                      | C-8, C-9                     |
| 1'  |                     | 146.7, C              |                                        |                              |
| 2'  |                     | 142.2, C              |                                        |                              |
| 3'  |                     | 108.3, C              |                                        |                              |
| 4'  |                     | 152.8, C              |                                        |                              |
| 5'  |                     | 117.2, C              |                                        |                              |
| 6'  |                     | 135.5, C              |                                        |                              |
| 7'  | 3.16, t (8.0)       | 33.2, CH <sub>2</sub> | H <sub>2</sub> -8'                     | C-1', C-5', C-6', C-8', C-9' |
| 8'  | 1.50, m             | 22.8, CH <sub>2</sub> | H <sub>2</sub> -7', H <sub>3</sub> -9' | C-6', C-7', C-9'             |
| 9'  | 1.00, t (7.2)       | 14.3, CH <sub>3</sub> | H <sub>2</sub> -8'                     | C-7', C-8'                   |
| MeO | 3.78, s             | 60.9, CH <sub>3</sub> |                                        | C-4'                         |



M-16-1 500 MHz DMSO

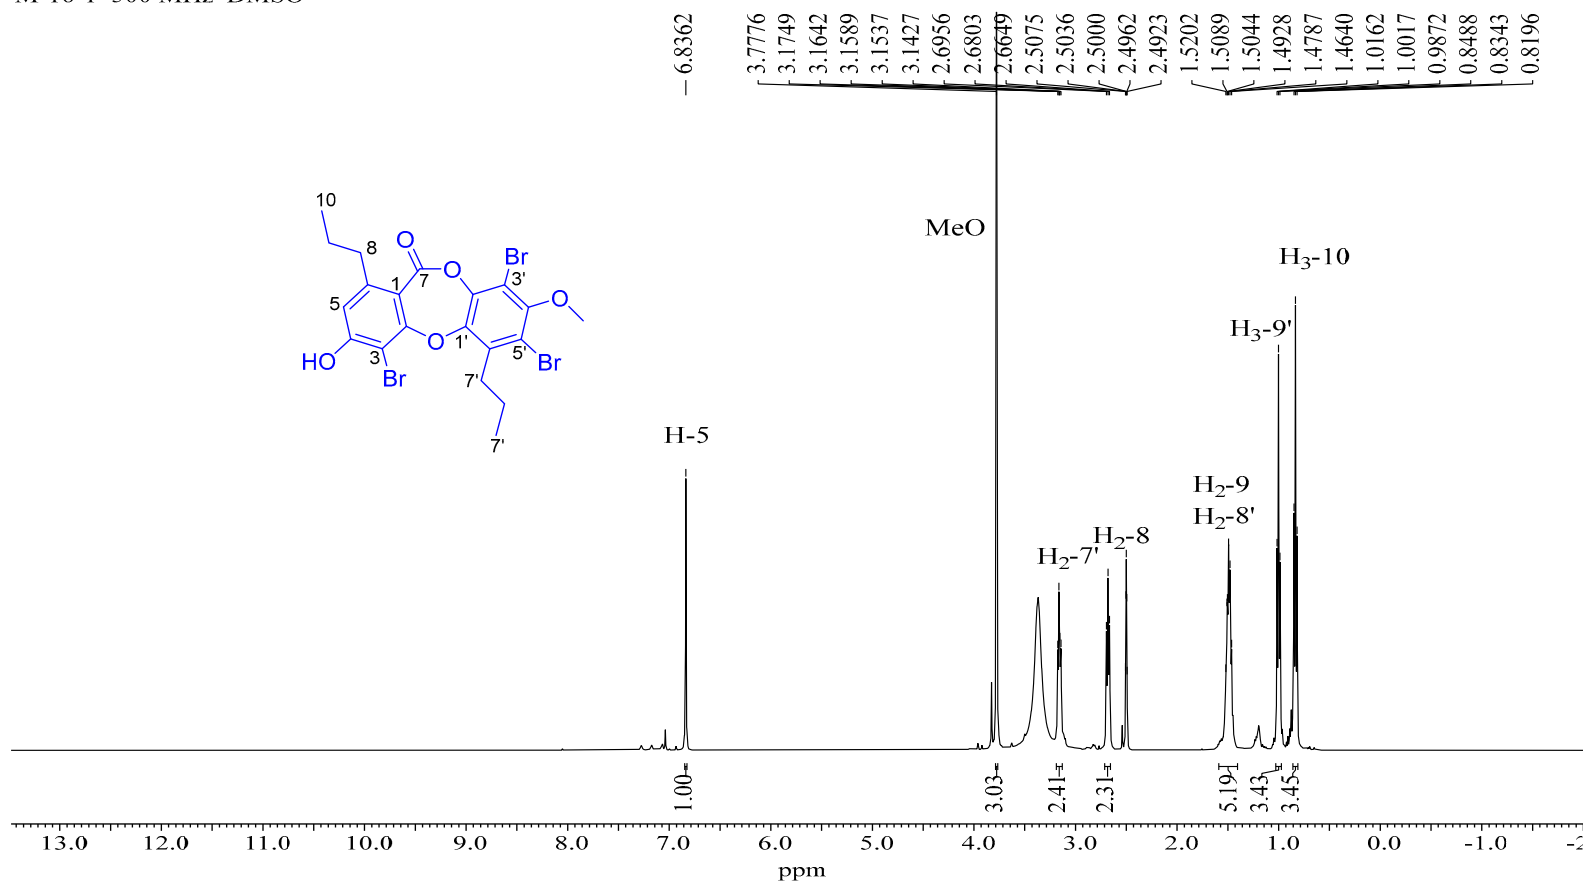

Figure S49. <sup>1</sup>H-NMR spectrum of **7** in DMSO-*d*<sub>6</sub> (500 MHz)

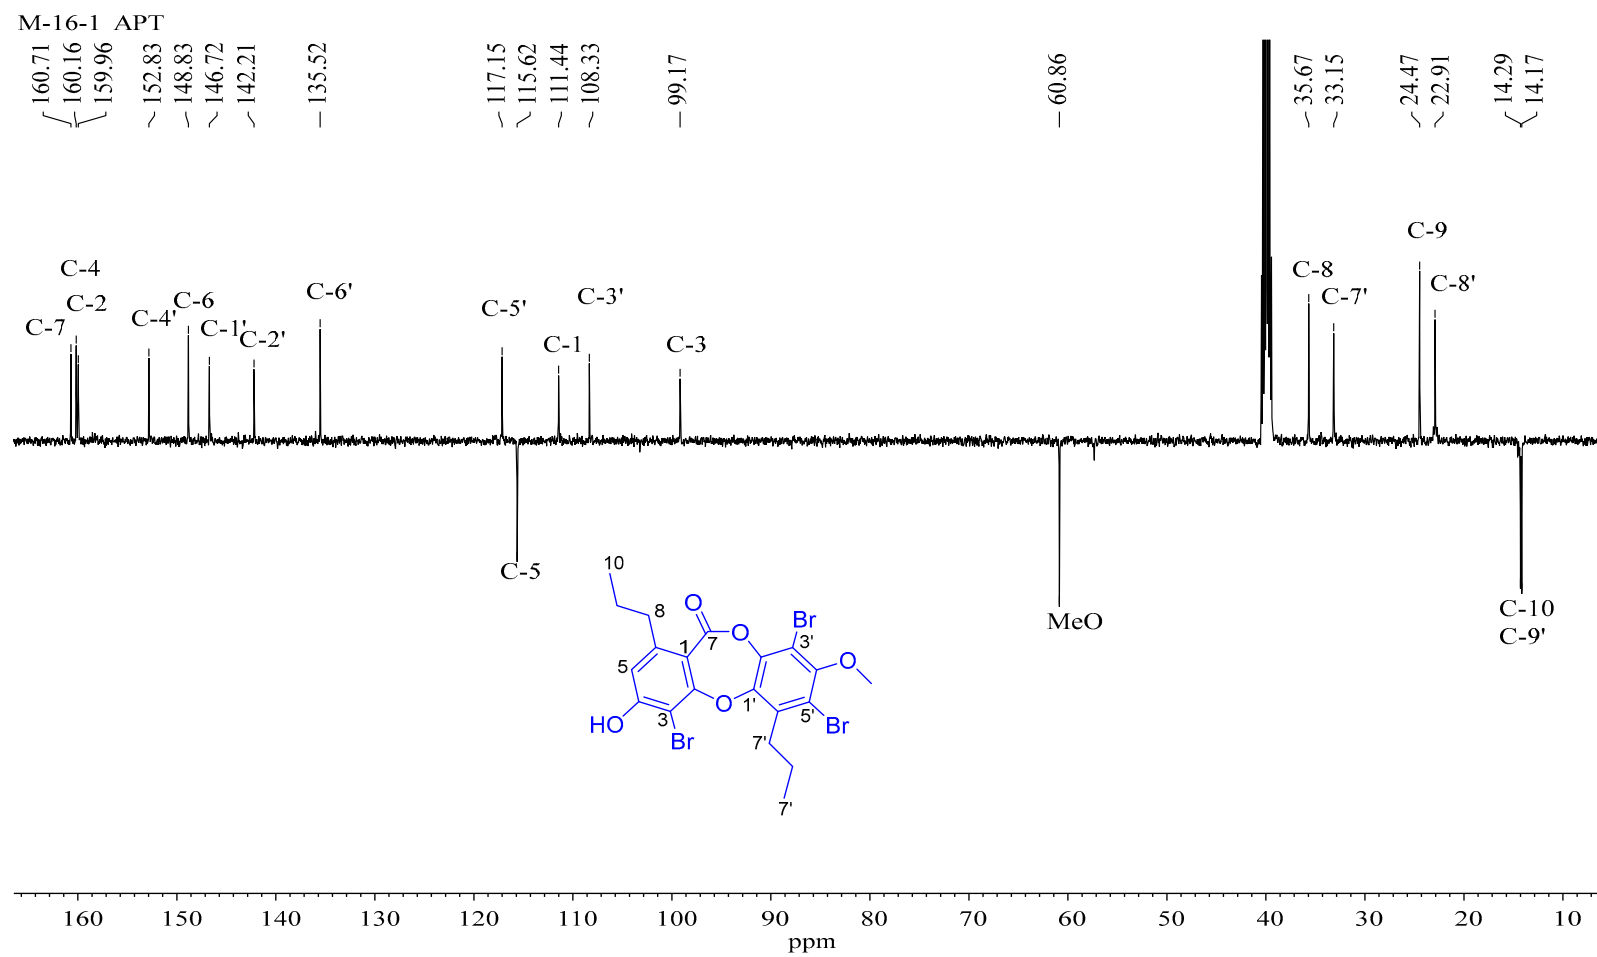

**Figure S50.** APT spectrum of **7** in DMSO- $d_6$  (125 MHz)

M-16-1 HSQC

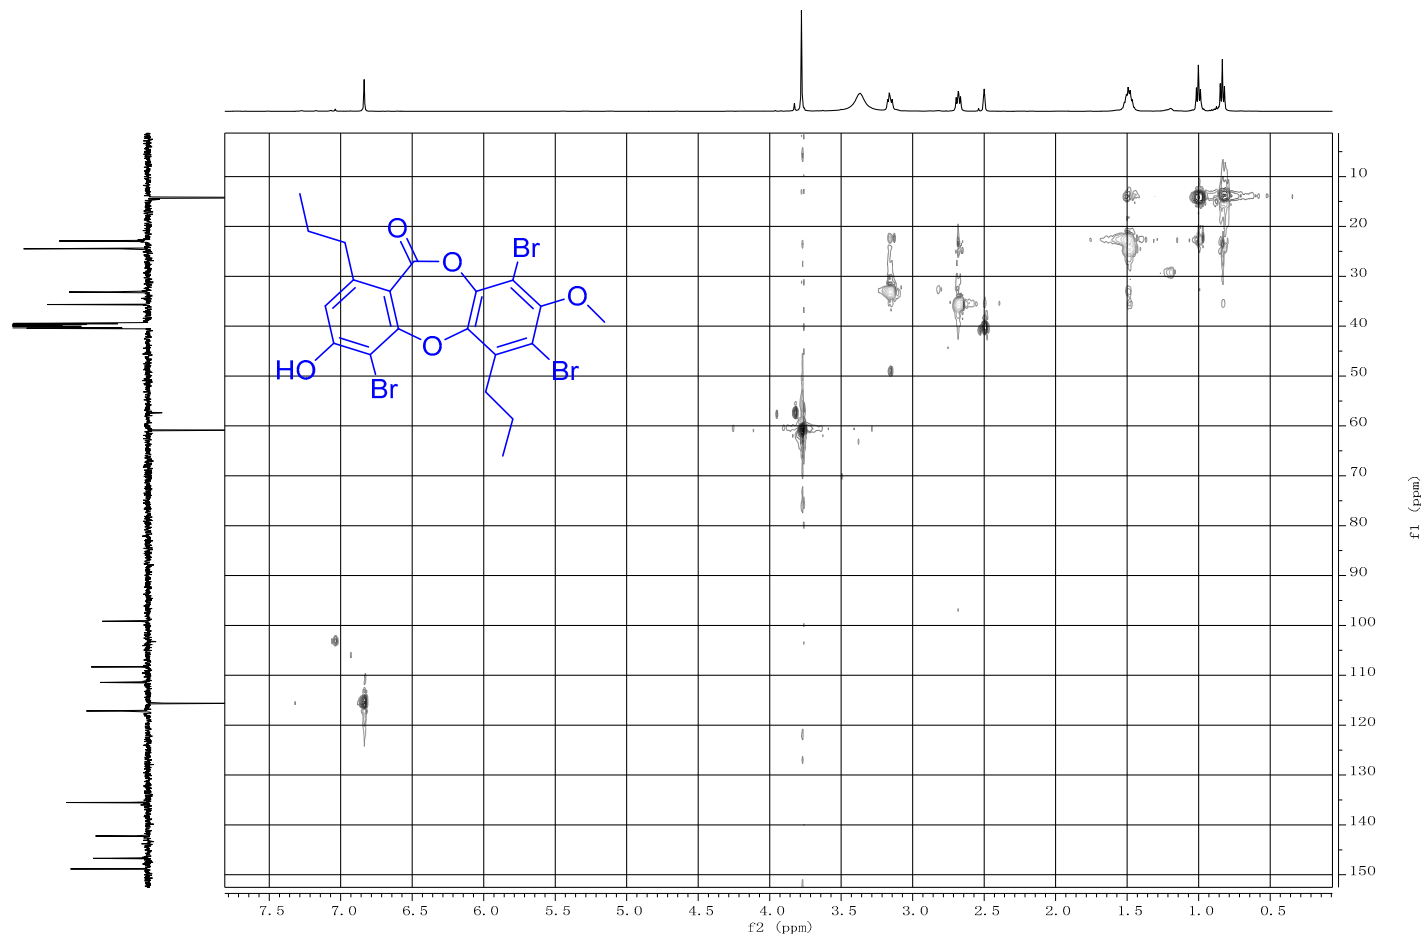

**Figure S51.** HSQC spectrum of **7** in DMSO-*d*<sub>6</sub>

M-16-1 COSY

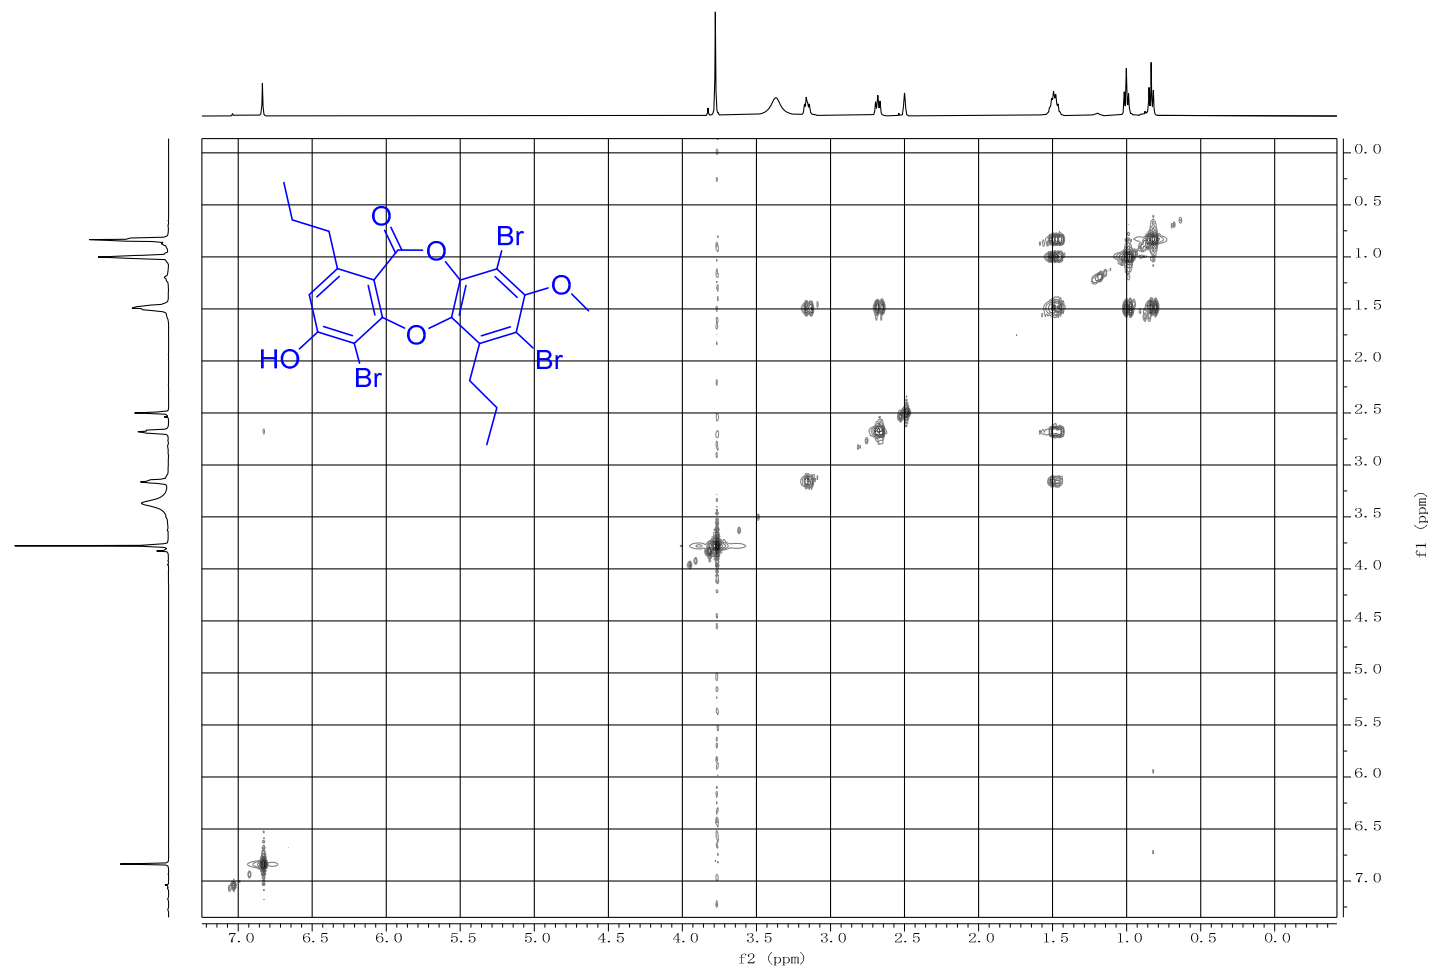

**Figure S52.**  $^1\text{H}$ - $^1\text{H}$  COSY spectrum of **7** in  $\text{DMSO-}d_6$

M-16-1 HMBC

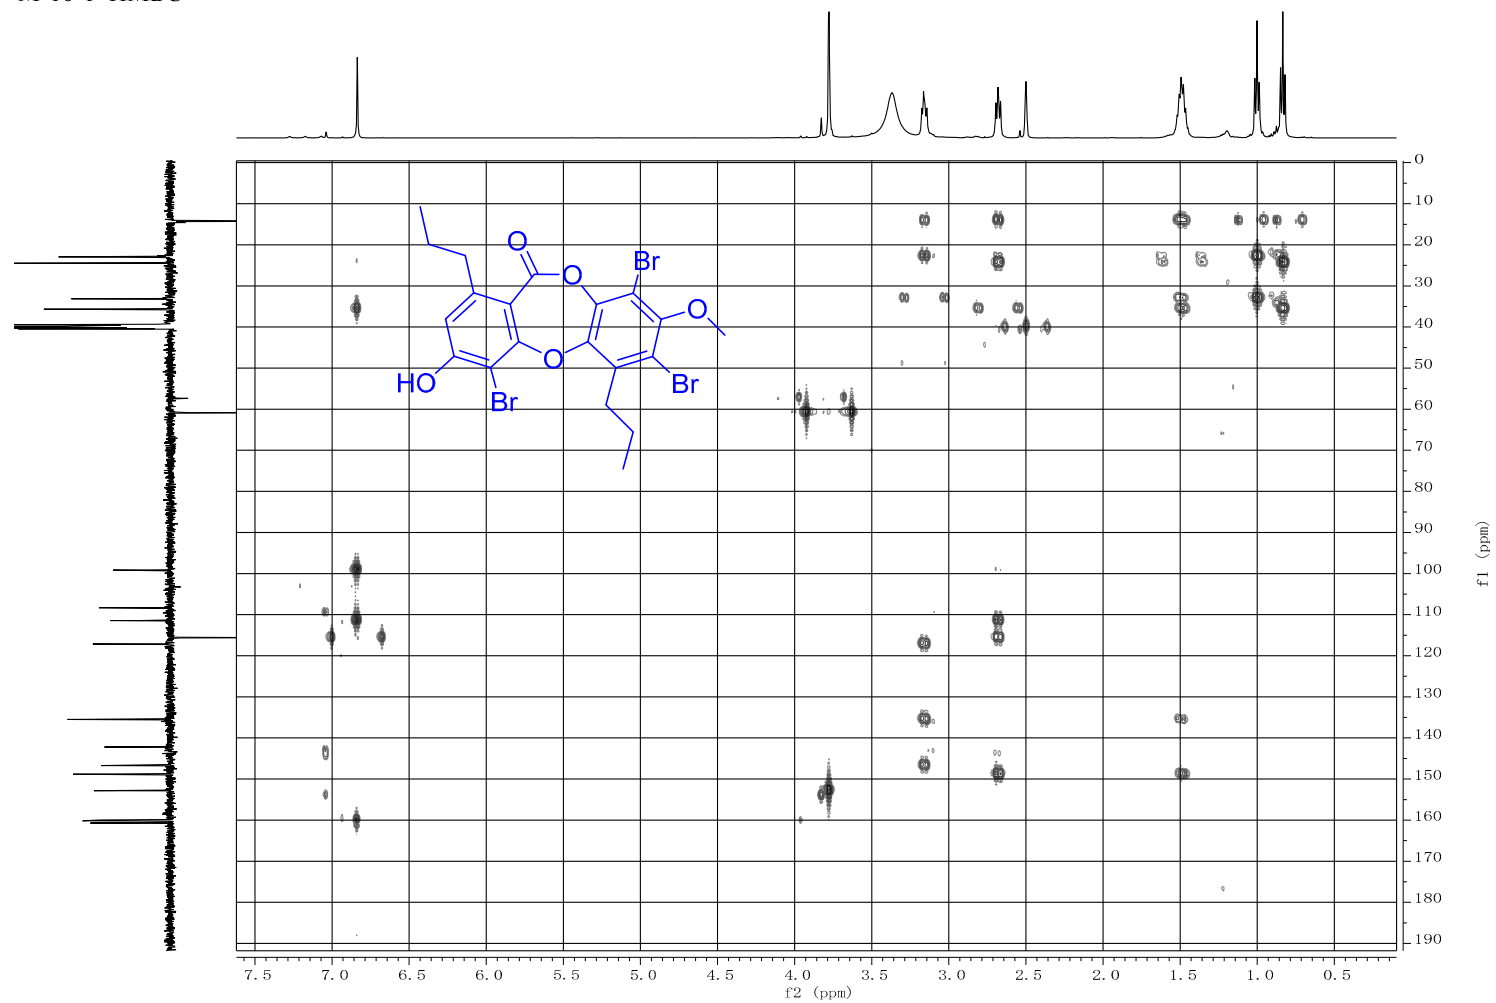

**Figure S53.** HMBC spectrum of **7** in DMSO-*d*<sub>6</sub>

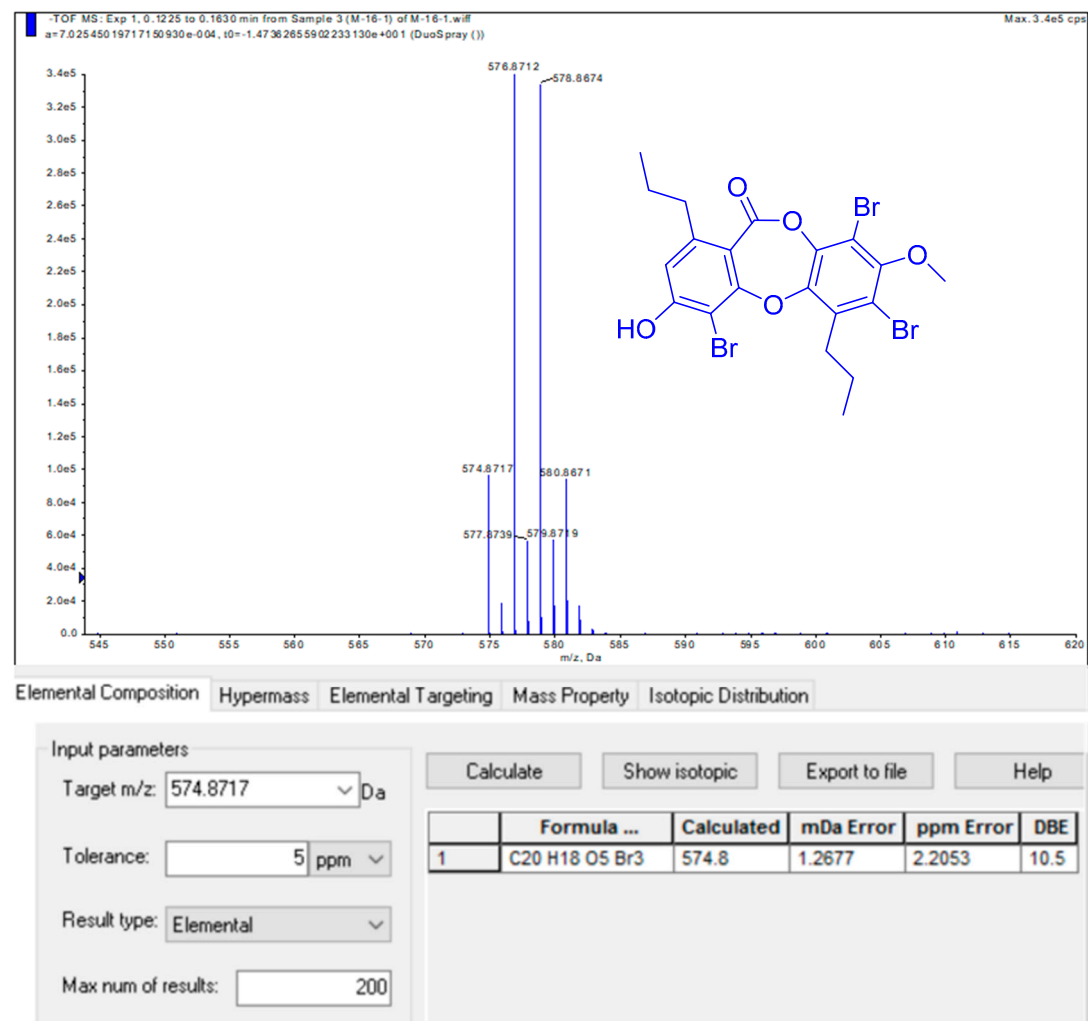

Figure S54. HRESIMS spectrum of 7

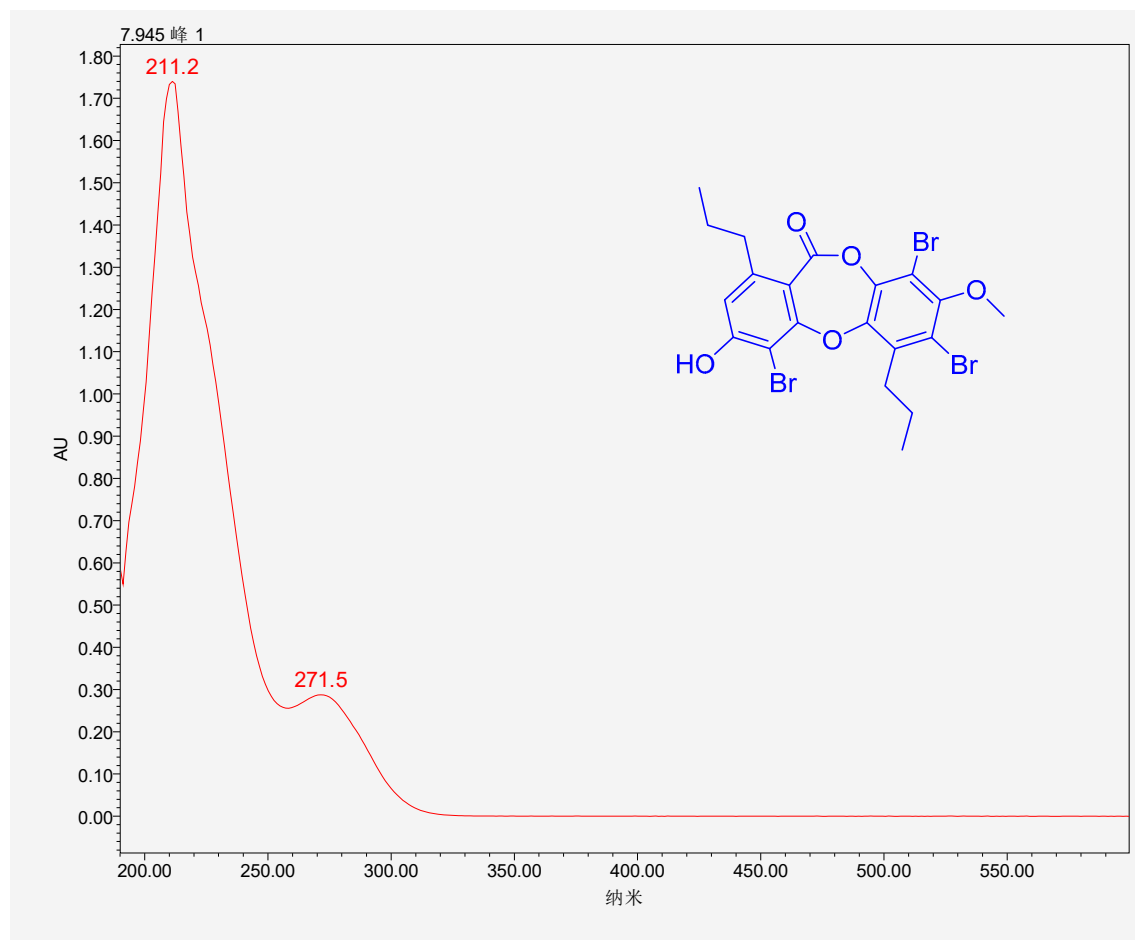

**Figure S55.** UV spectrum of **7**

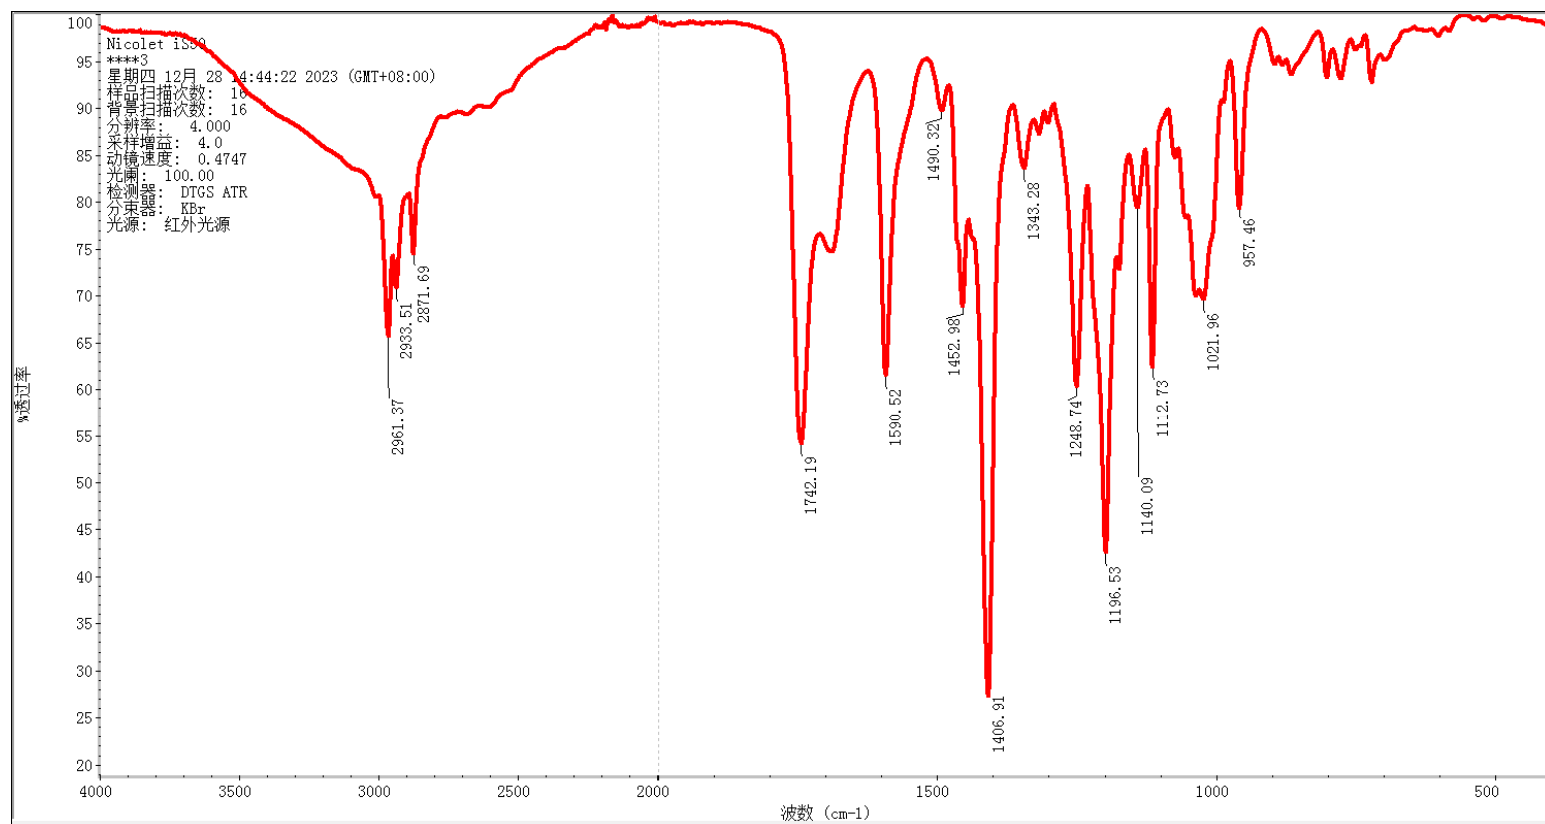

Figure S56. IR spectrum of 7



**Table S8. <sup>1</sup>H and <sup>13</sup>C NMR data and key COSY and HMBC correlations of 8**

| No. | $\delta_{\text{H}}$ | $\delta_{\text{C}}$   | COSY                                   | HMBC                         |
|-----|---------------------|-----------------------|----------------------------------------|------------------------------|
| 1   |                     | 111.7, C              |                                        |                              |
| 2   |                     | 161.0, C              |                                        |                              |
| 3   | 6.84, s             | 105.7, CH             |                                        | C-1, C-2, C-3, C-4           |
| 4   |                     | 158.4, C              |                                        |                              |
| 5   |                     | 112.4, C              |                                        |                              |
| 6   |                     | 147.3, C              |                                        |                              |
| 7   |                     | 161.2, C              |                                        |                              |
| 8   | 2.85, m             | 35.7, CH <sub>2</sub> | H <sub>2</sub> -9                      | C-1, C-5, C-6, C-9, C-10     |
| 9   | 1.55, m             | 22.8, CH <sub>2</sub> | H <sub>2</sub> -8, H <sub>3</sub> -10  | C-6, C-8, C-10               |
| 10  | 0.88, t (7.2)       | 14.2, CH <sub>3</sub> | H <sub>2</sub> -9                      | C-8, C-9                     |
| 1'  |                     | 146.1, C              |                                        |                              |
| 2'  |                     | 142.5, C              |                                        |                              |
| 3'  |                     | 108.0, C              |                                        |                              |
| 4'  |                     | 152.5, C              |                                        |                              |
| 5'  |                     | 116.6, C              |                                        |                              |
| 6'  |                     | 135.2, C              |                                        |                              |
| 7'  | 2.87, m             | 32.5, CH <sub>2</sub> | H <sub>2</sub> -8'                     | C-1', C-5', C-6', C-8', C-9' |
| 8'  | 1.55, m             | 22.5, CH <sub>2</sub> | H <sub>2</sub> -7', H <sub>3</sub> -9' | C-6', C-7', C-9'             |
| 9'  | 1.04, t (7.2)       | 14.5, CH <sub>3</sub> | H <sub>2</sub> -8'                     | C-7', C-8'                   |
| MeO | 3.76, s             | 60.9, CH <sub>3</sub> |                                        | C-4'                         |

M-16-2 500 MHz DMSO

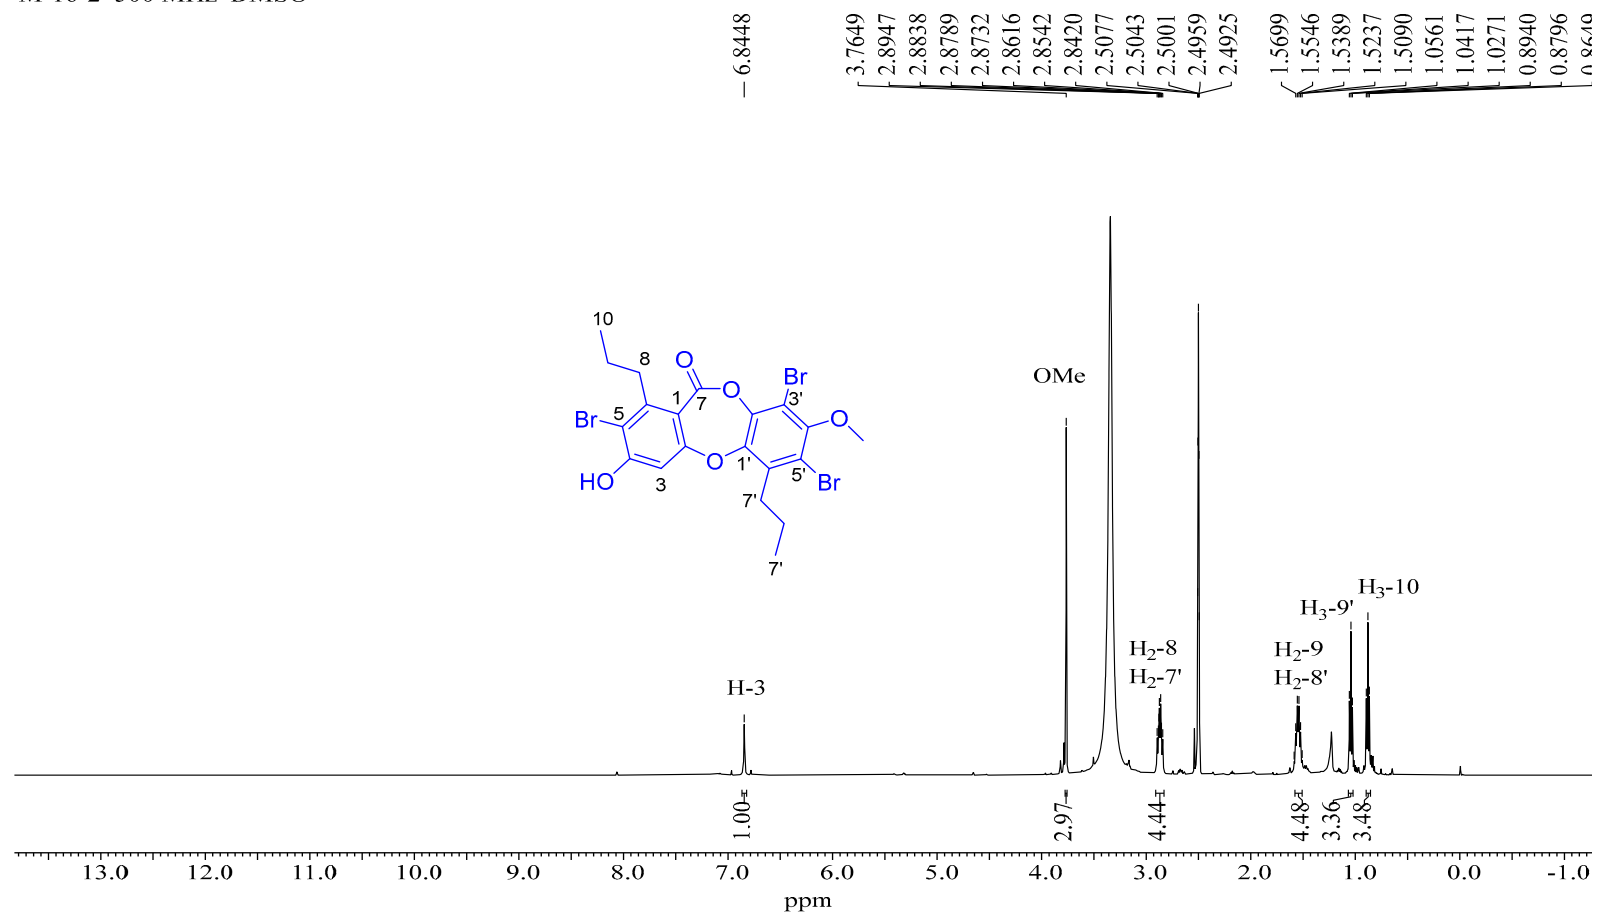

**Figure S57.**  $^1\text{H}$ -NMR spectrum of **8** in DMSO- $d_6$  (500 MHz)

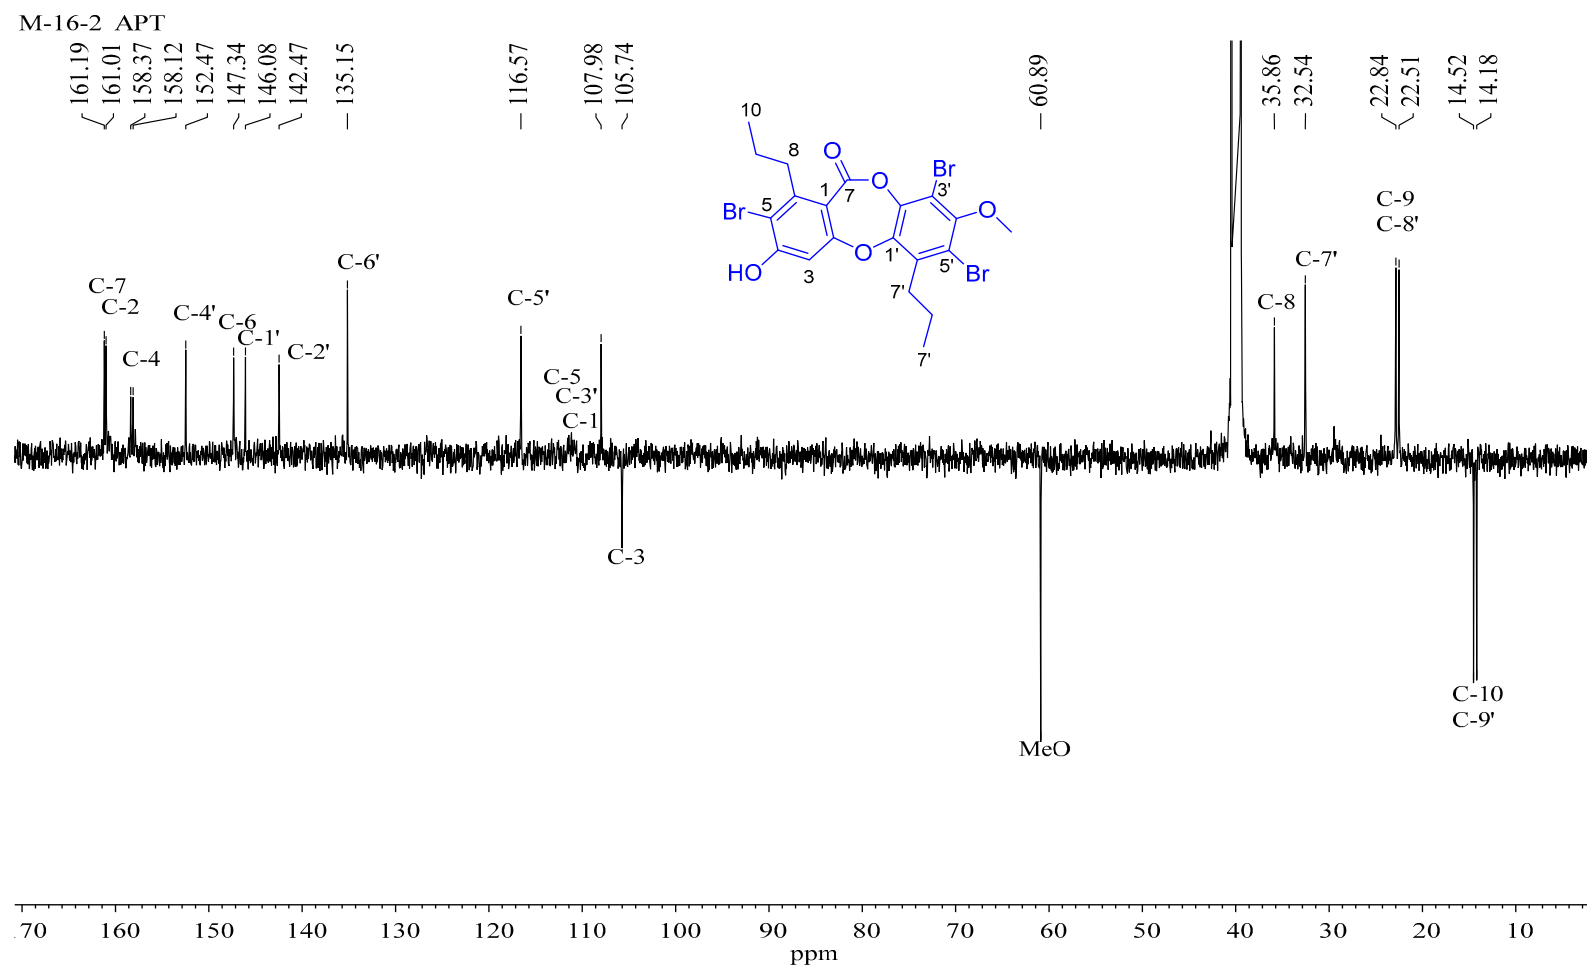

**Figure S58.** APT spectrum of **8** in DMSO-*d*<sub>6</sub> (125 MHz)

M-16-2 HSQC

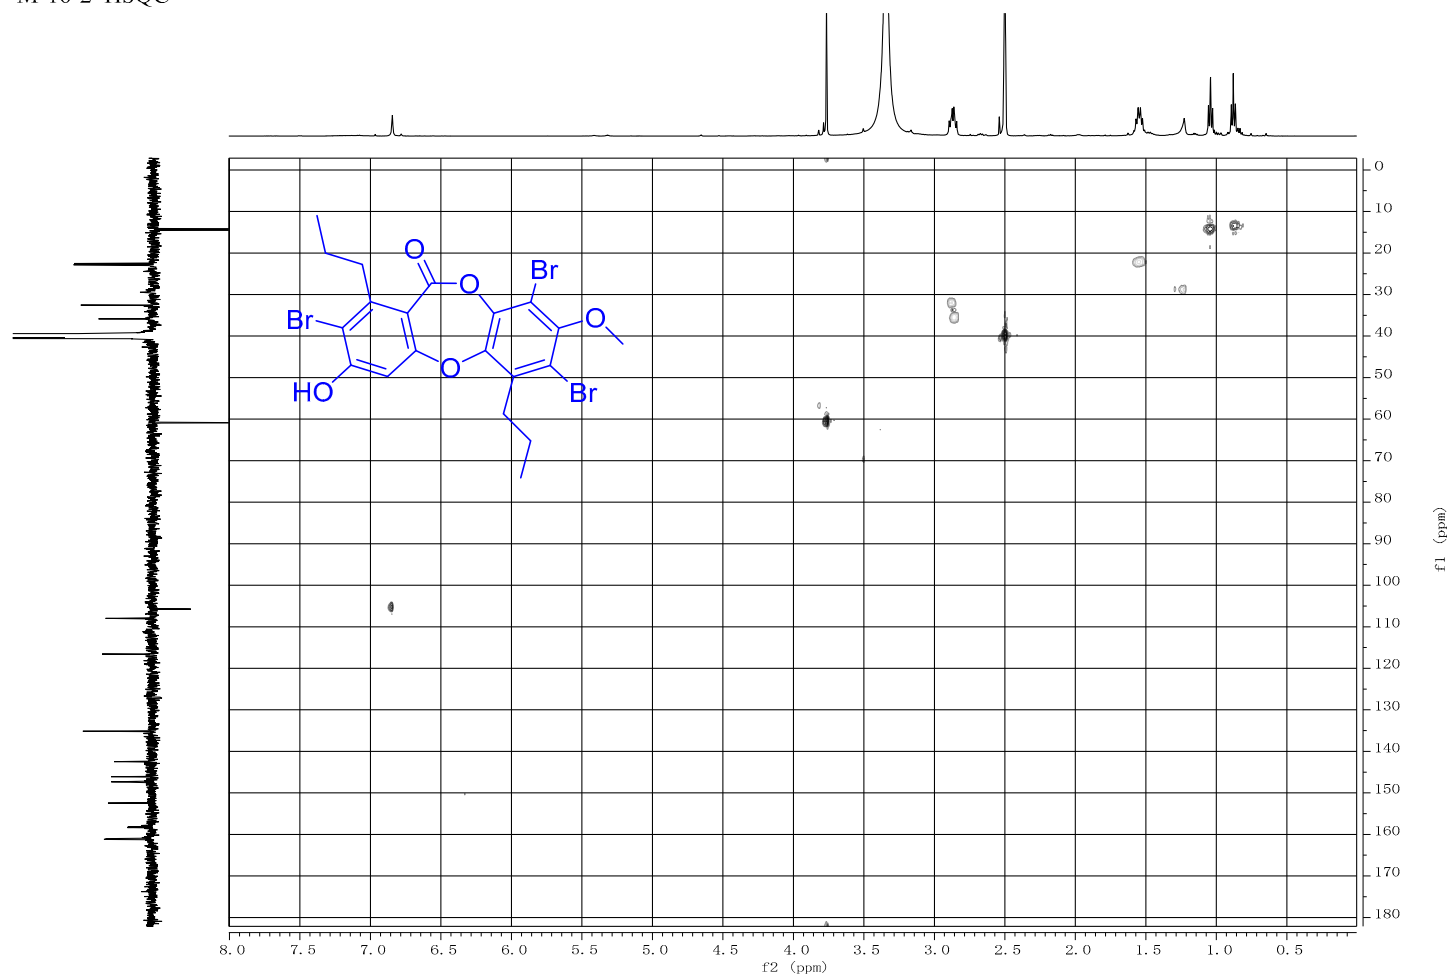

**Figure S59.** HSQC spectrum of **8** in DMSO-*d*<sub>6</sub>

M-16-2 COSY

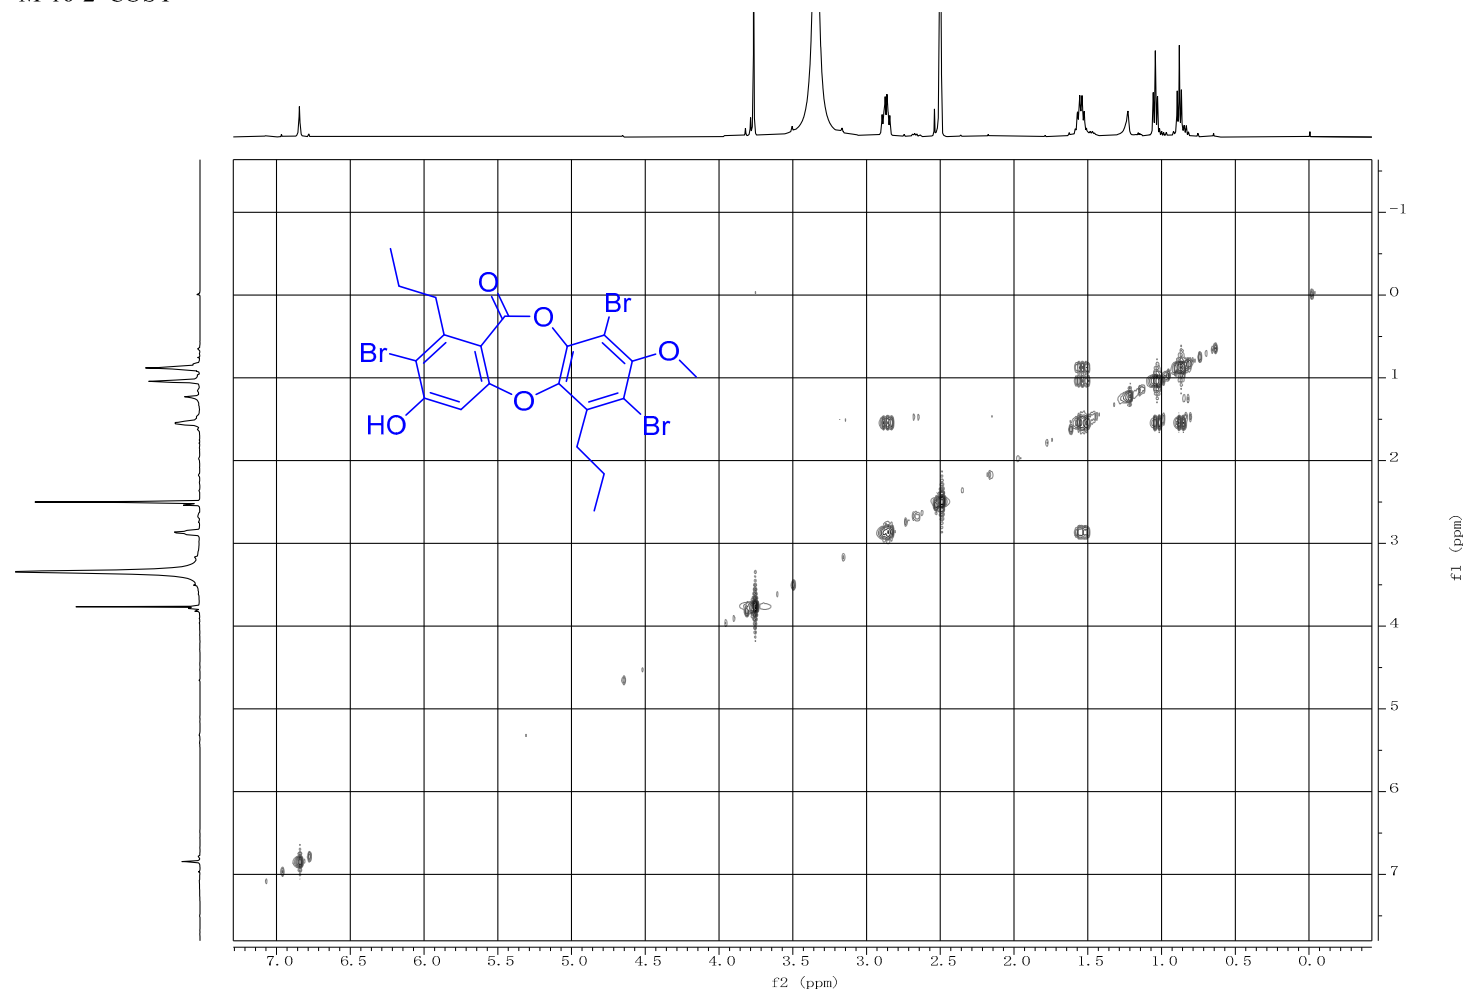

**Figure S60.**  $^1\text{H}$ - $^1\text{H}$  COSY spectrum of **8** in  $\text{DMSO}-d_6$

M-16-2 HMBC

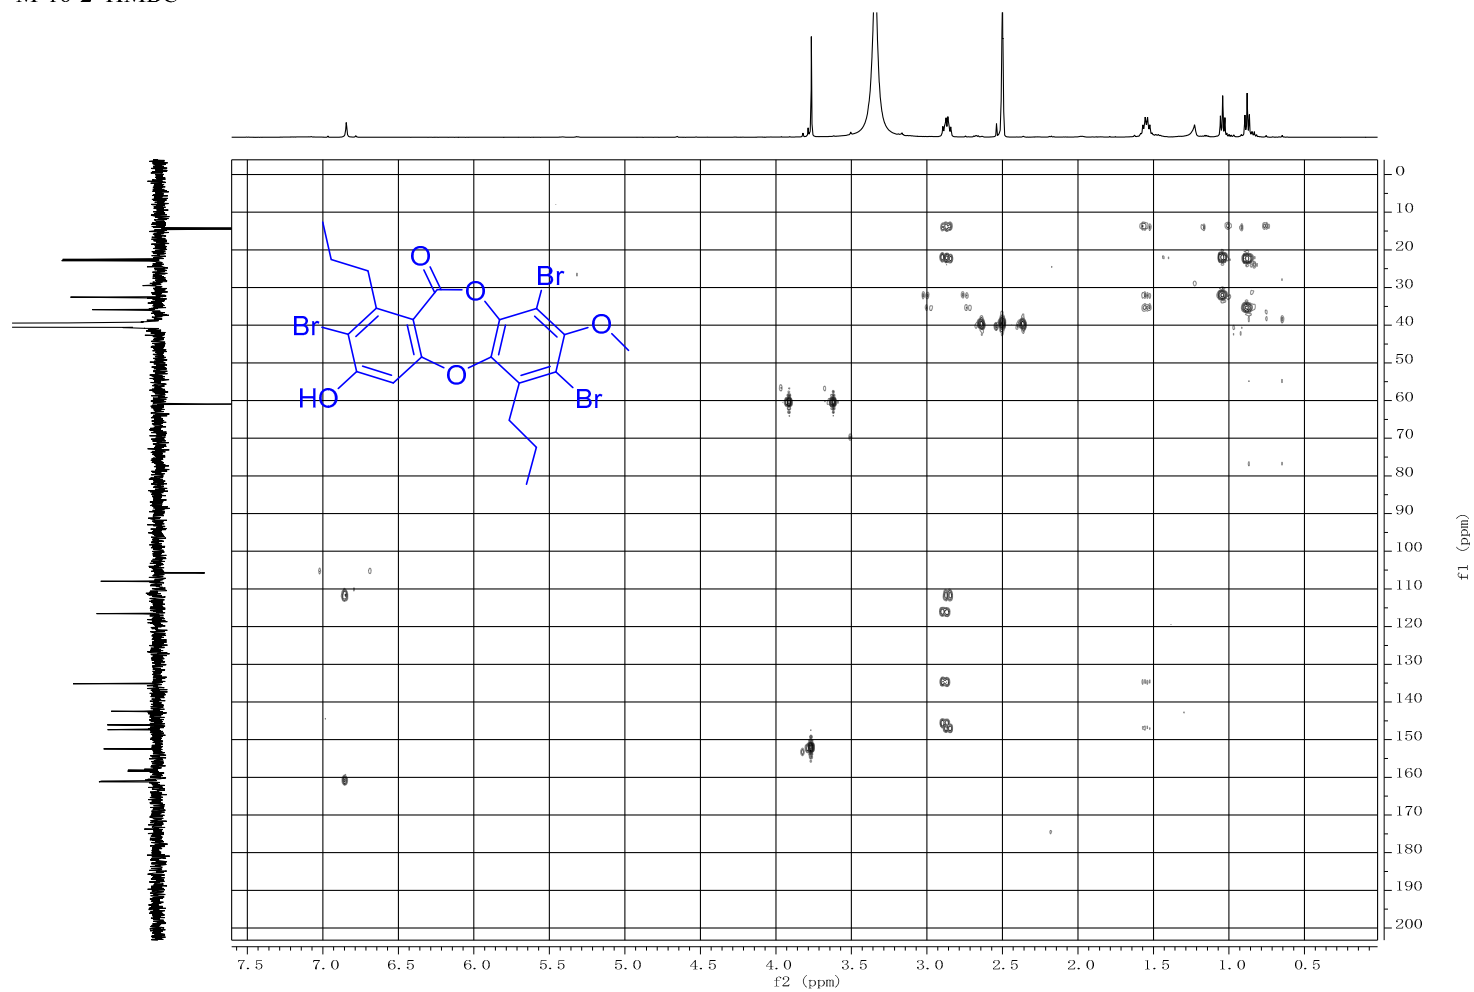

**Figure S61.** HMBC spectrum of **8** in DMSO-*d*<sub>6</sub>

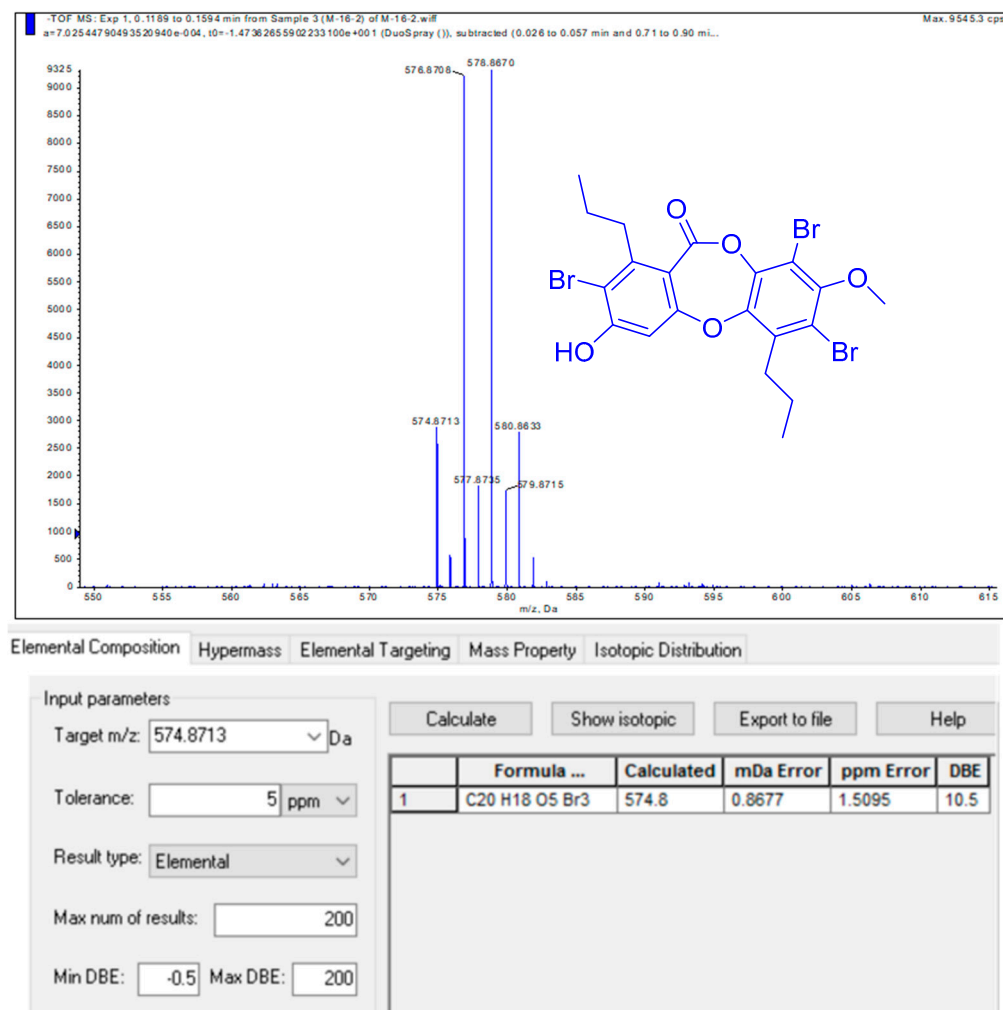

**Figure S62.** HRESIMS spectrum of **8**

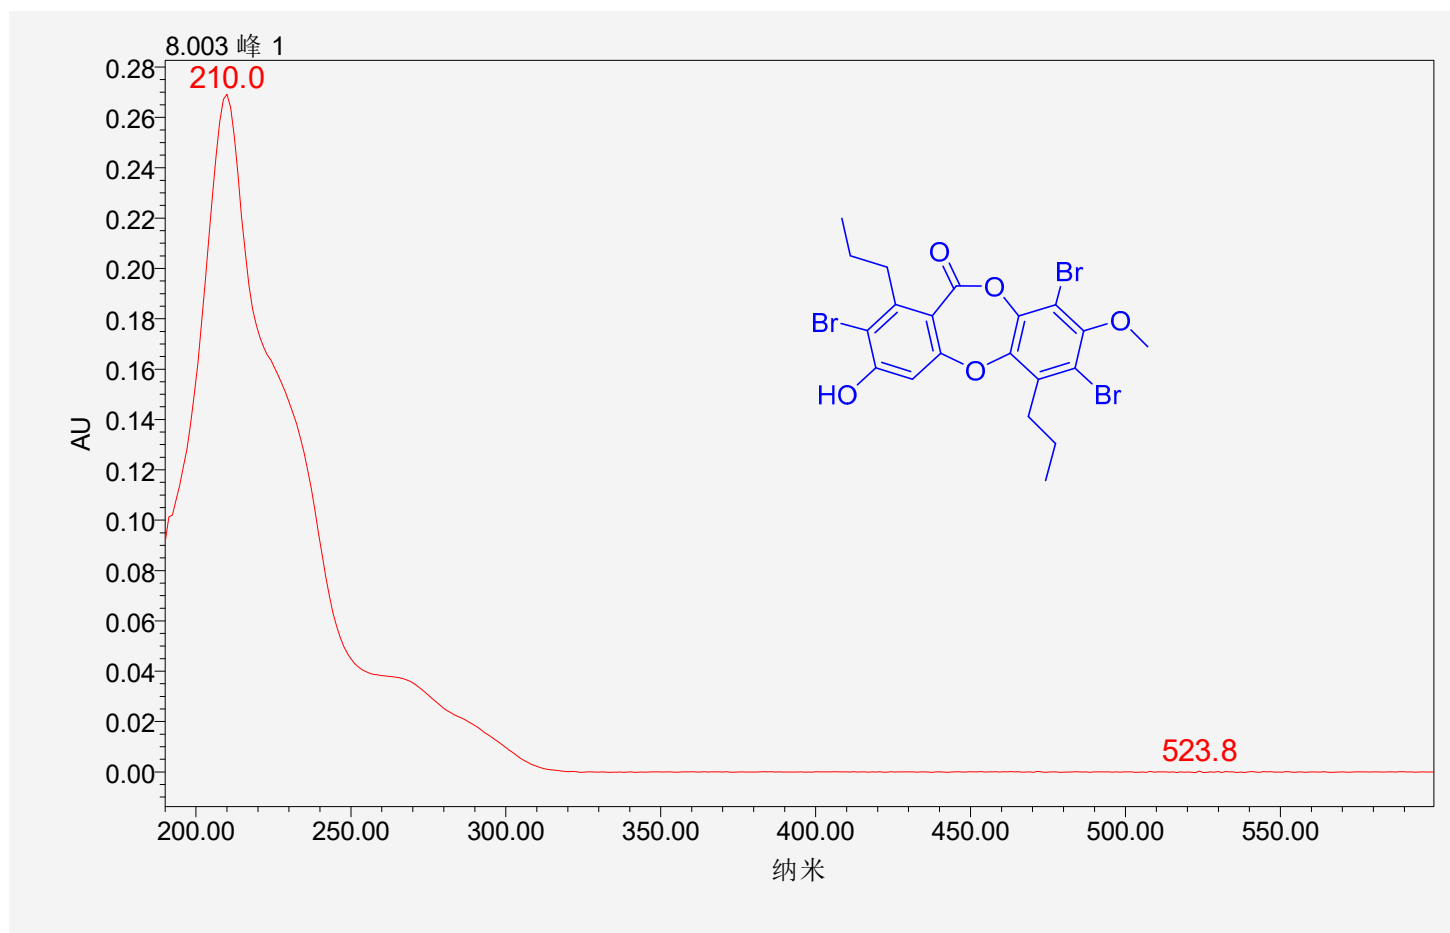

**Figure S63.** UV spectrum of **8**



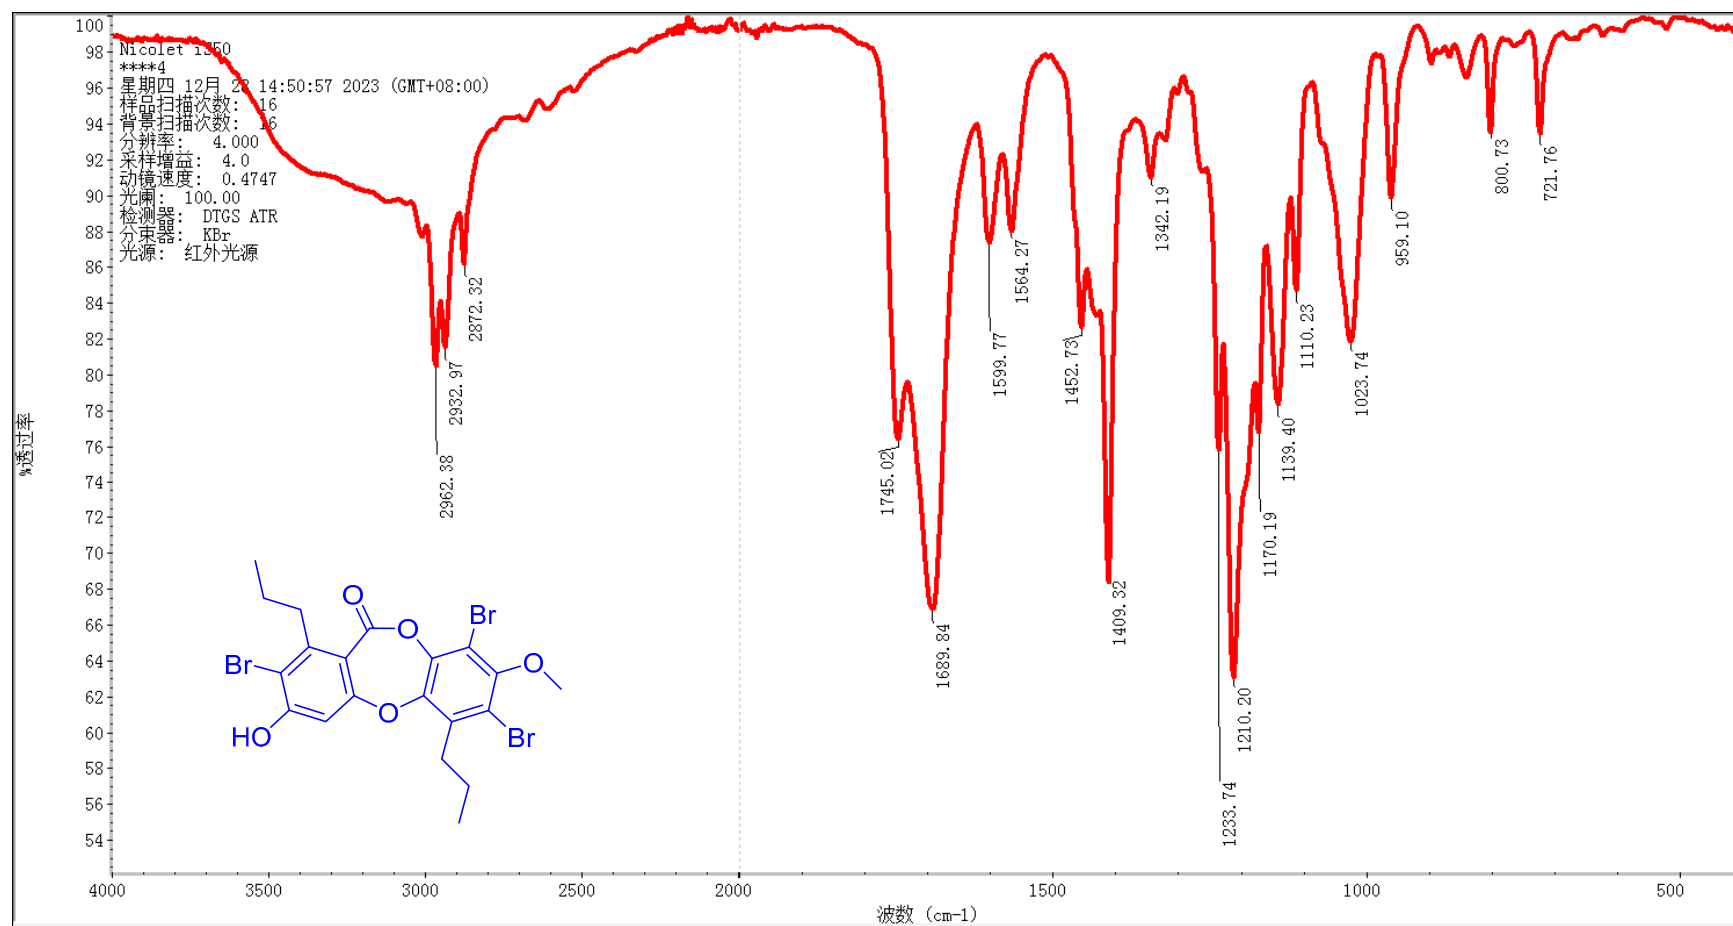

Figure S64. IR spectrum of **8**

**Table S9. <sup>1</sup>H and <sup>13</sup>C NMR data and key COSY and HMBC correlations of 9**

| No. | $\delta_{\text{H}}$ | $\delta_{\text{C}}$   | COSY                                   | HMBC                         |
|-----|---------------------|-----------------------|----------------------------------------|------------------------------|
| 1   |                     | 112.7, C              |                                        |                              |
| 2   |                     | 158.8, C              |                                        |                              |
| 3   |                     | 101.5, C              |                                        |                              |
| 4   |                     | 158.8, C              |                                        |                              |
| 5   |                     | 113.8, C              |                                        |                              |
| 6   |                     | 146.1, C              |                                        |                              |
| 7   |                     | 160.6, C              |                                        |                              |
| 8   | 2.81, t (7.7)       | 36.6, CH <sub>2</sub> | H <sub>2</sub> -9                      | C-1, C-5, C-6, C-9, C-10     |
| 9   | 1.58, m             | 22.7, CH <sub>2</sub> | H <sub>2</sub> -8, H <sub>3</sub> -10  | C-6, C-8, C-10               |
| 10  | 0.87, t (7.3)       | 14.1, CH <sub>3</sub> | H <sub>2</sub> -9                      | C-8, C-9                     |
| 1'  |                     | 146.6, C              |                                        |                              |
| 2'  |                     | 142.2, C              |                                        |                              |
| 3'  |                     | 108.3, C              |                                        |                              |
| 4'  |                     | 152.9, C              |                                        |                              |
| 5'  |                     | 117.2, C              |                                        |                              |
| 6'  |                     | 135.5, C              |                                        |                              |
| 7'  | 3.15, t (7.9)       | 33.2, CH <sub>2</sub> | H <sub>2</sub> -8'                     | C-1', C-5', C-6', C-8', C-9' |
| 8'  | 1.50, m             | 22.9, CH <sub>2</sub> | H <sub>2</sub> -7', H <sub>3</sub> -9' | C-6', C-7', C-9'             |
| 9'  | 1.02, t (7.3)       | 14.3, CH <sub>3</sub> | H <sub>2</sub> -8'                     | C-7', C-8'                   |
| MeO | 3.78, s             | 60.8, CH <sub>3</sub> |                                        | C-4'                         |

Fr.C-2 400 MHz DMSO

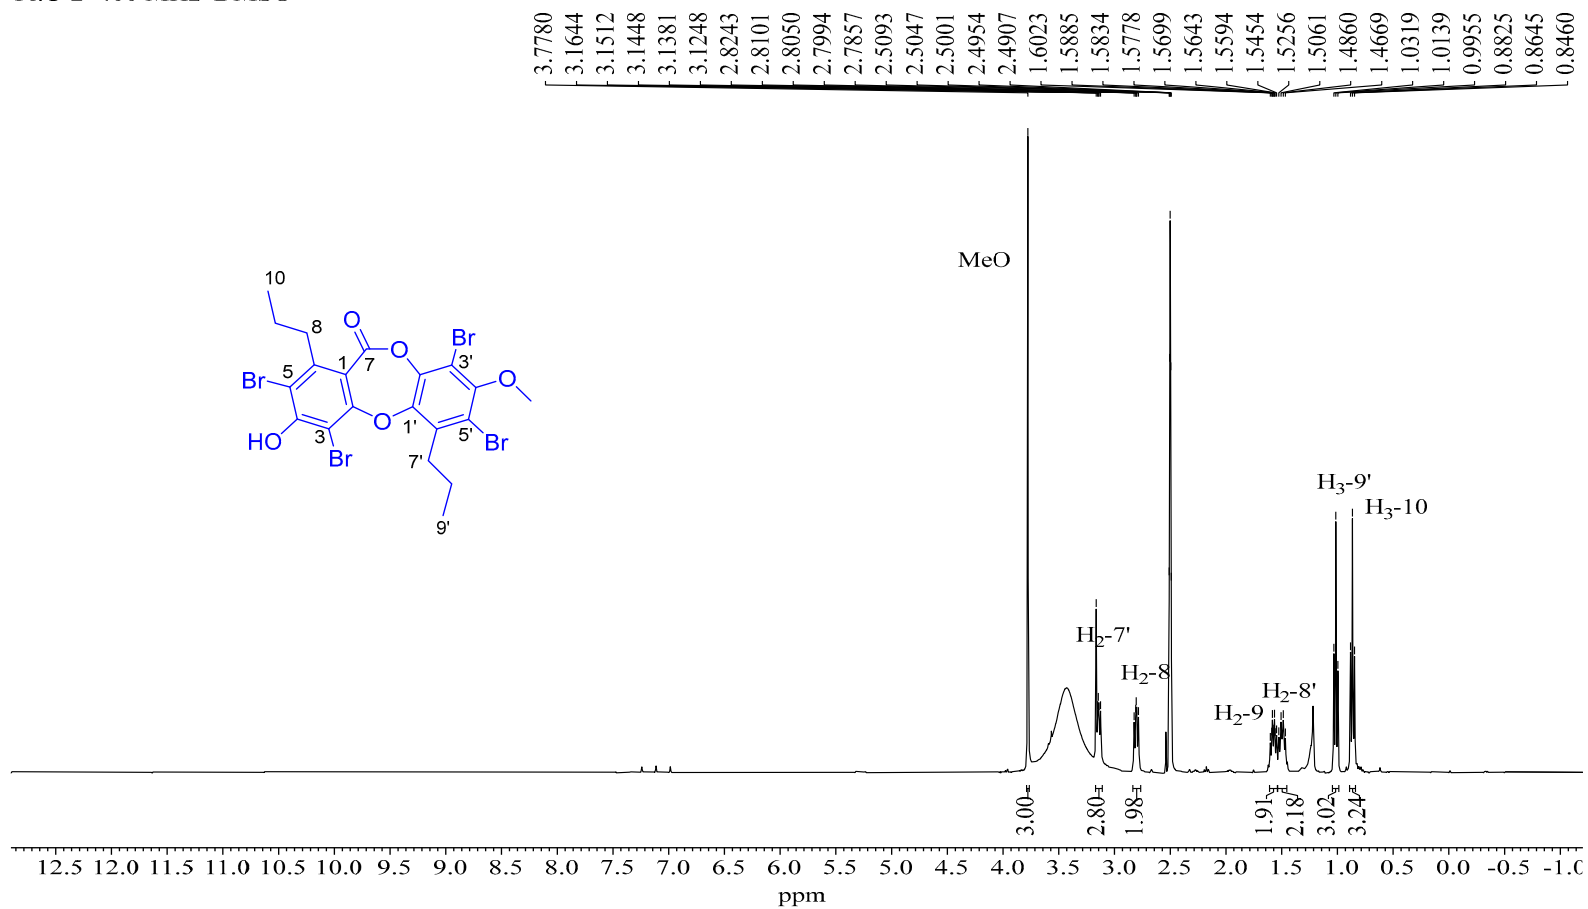

**Figure S65.**  $^1\text{H}$ -NMR spectrum of **9** in DMSO- $d_6$  (400 MHz)

Fr.C-2 C

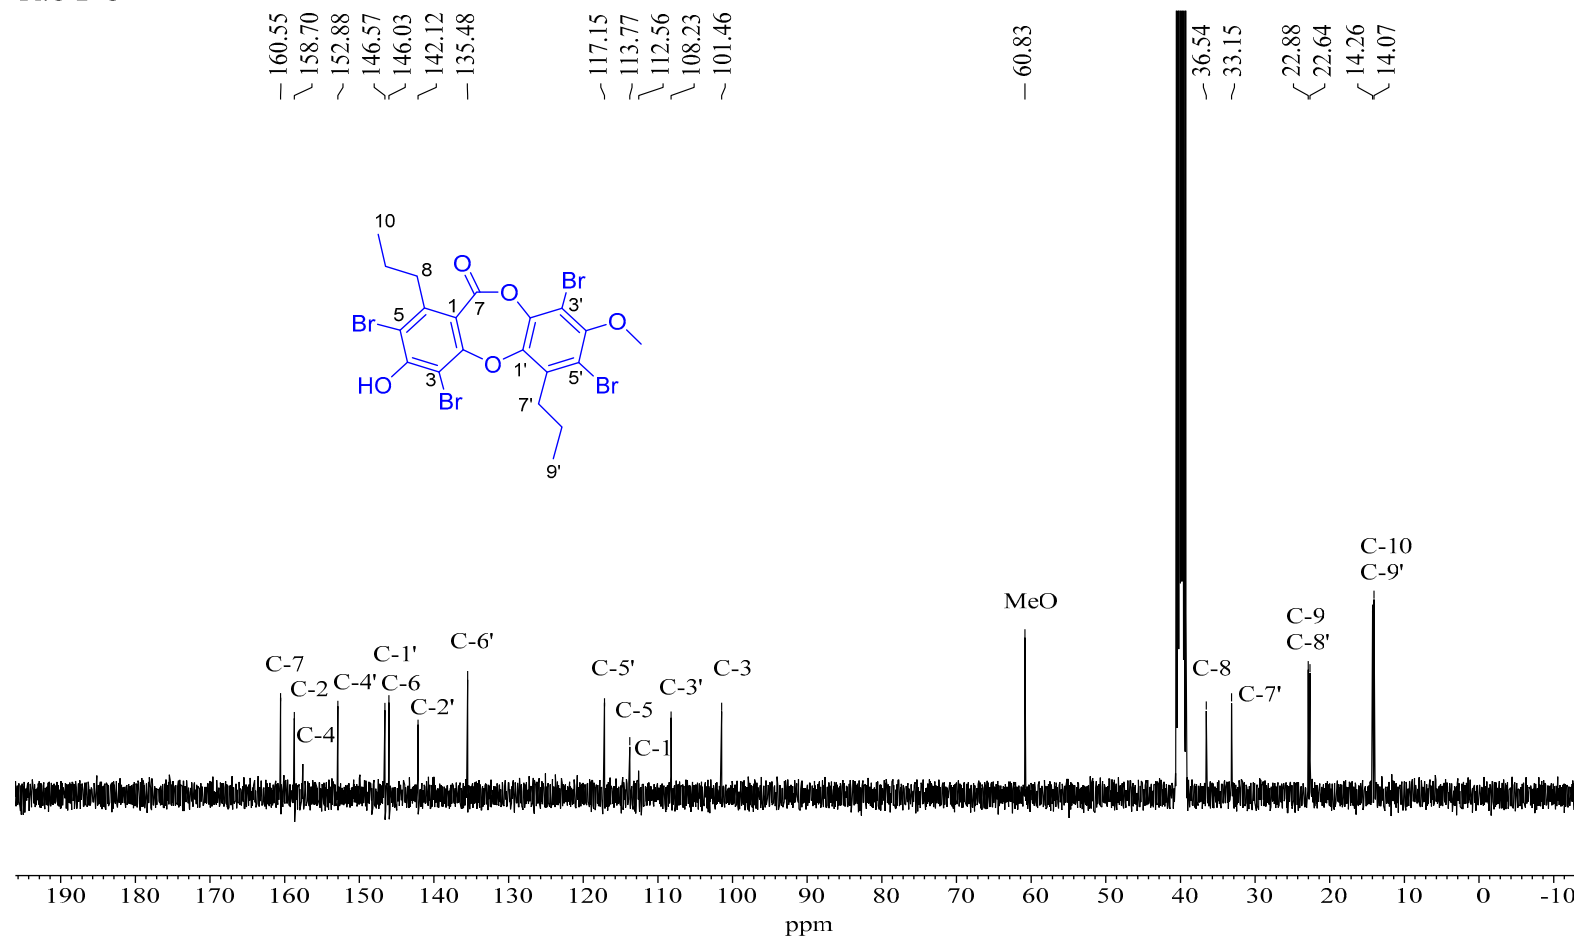

**Figure S66.**  $^{13}\text{C}$ -NMR spectrum of **9** in  $\text{DMSO-}d_6$  (100 MHz)

Fr.C-2 HSQC

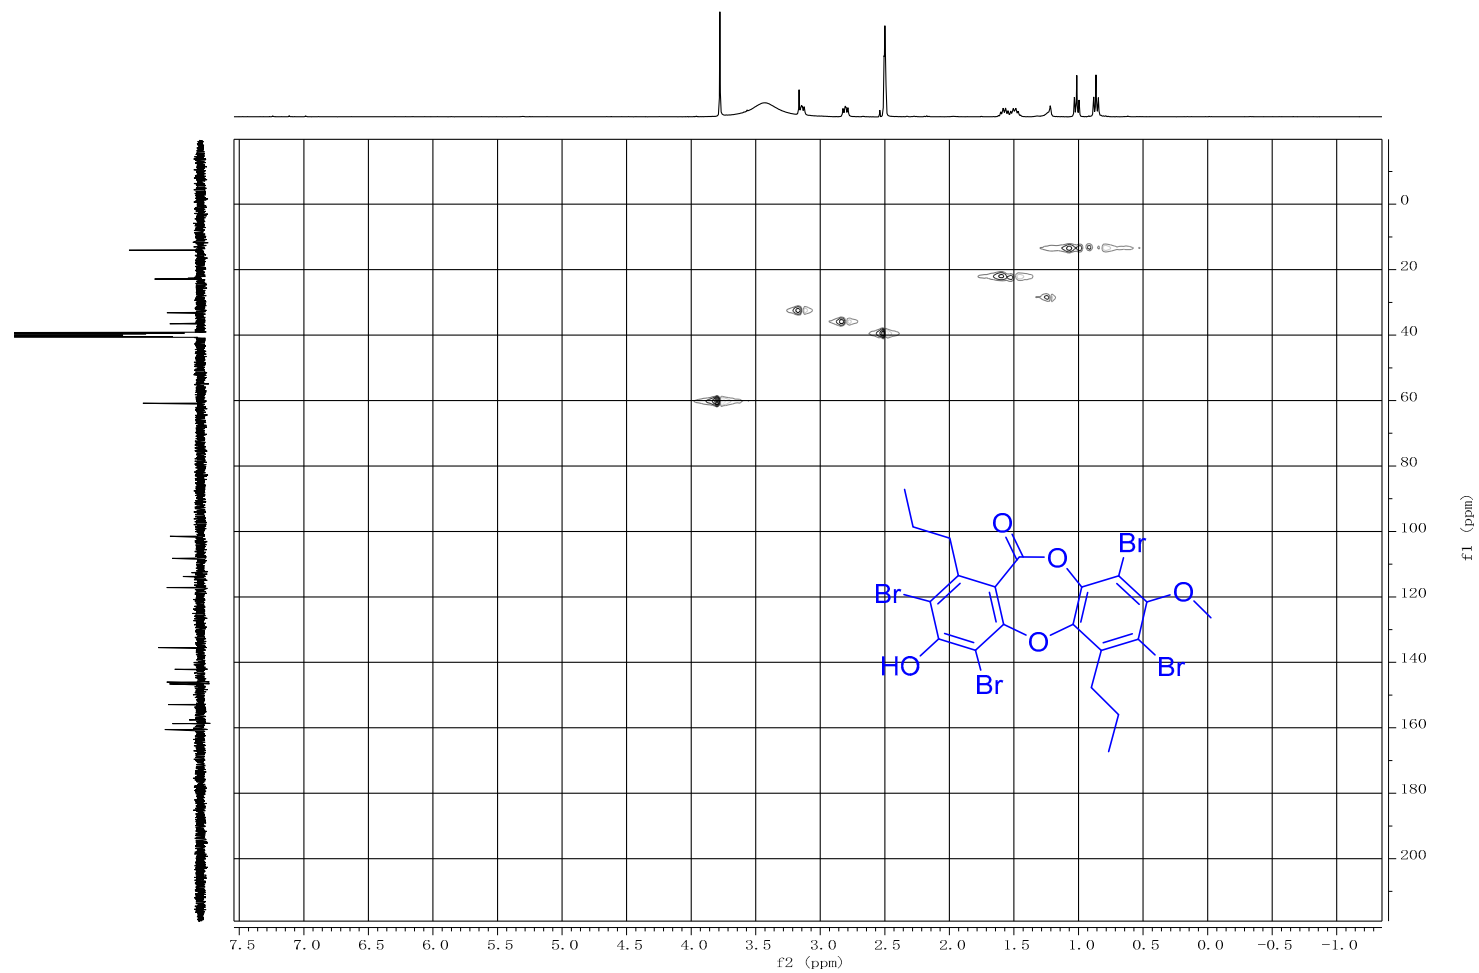

**Figure S67.** HSQC spectrum of **9** in DMSO-*d*<sub>6</sub>

Fr.C-2 COSY

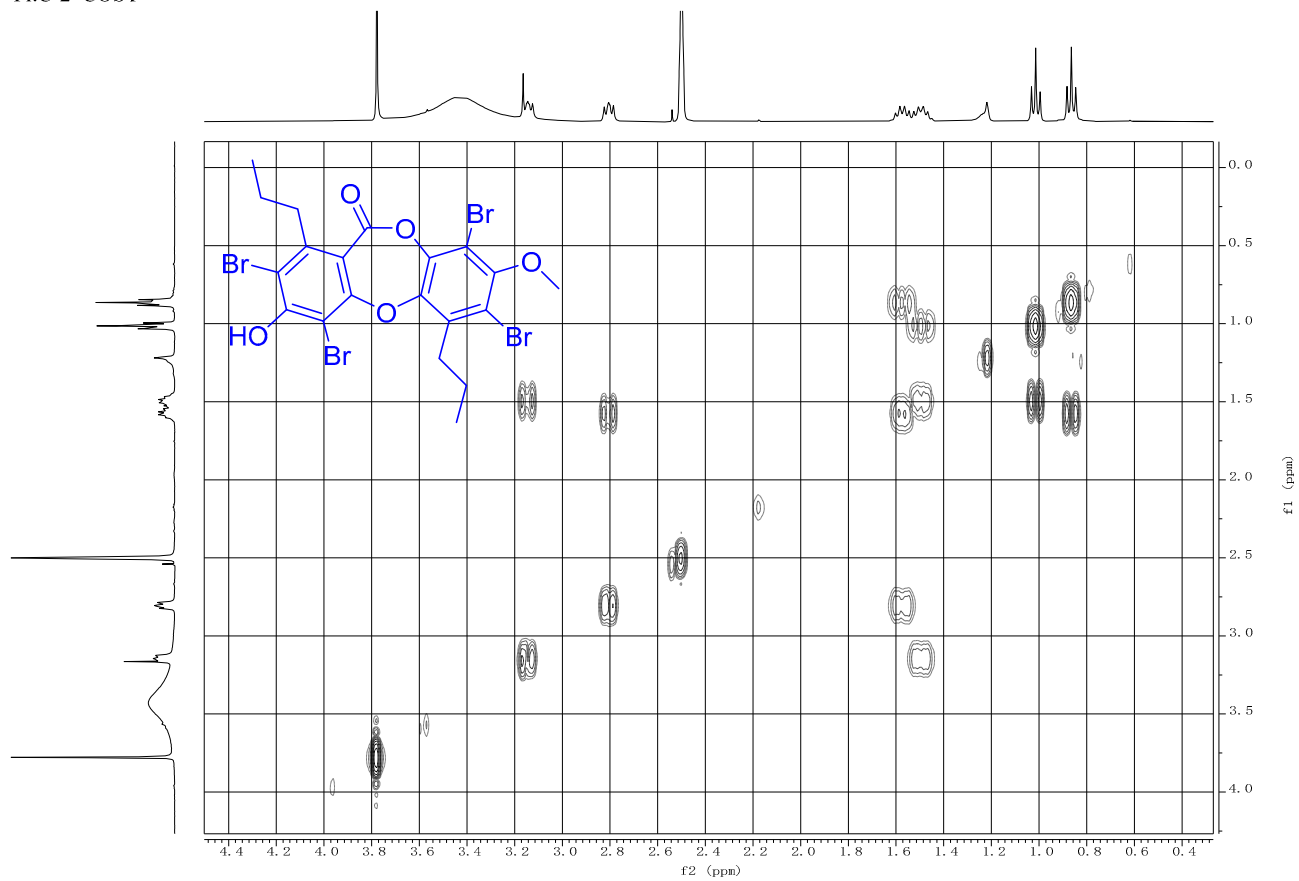

**Figure S68.**  $^1\text{H}$ - $^1\text{H}$  COSY spectrum of **9** in  $\text{DMSO}-d_6$

Fr.C-2 HMBC

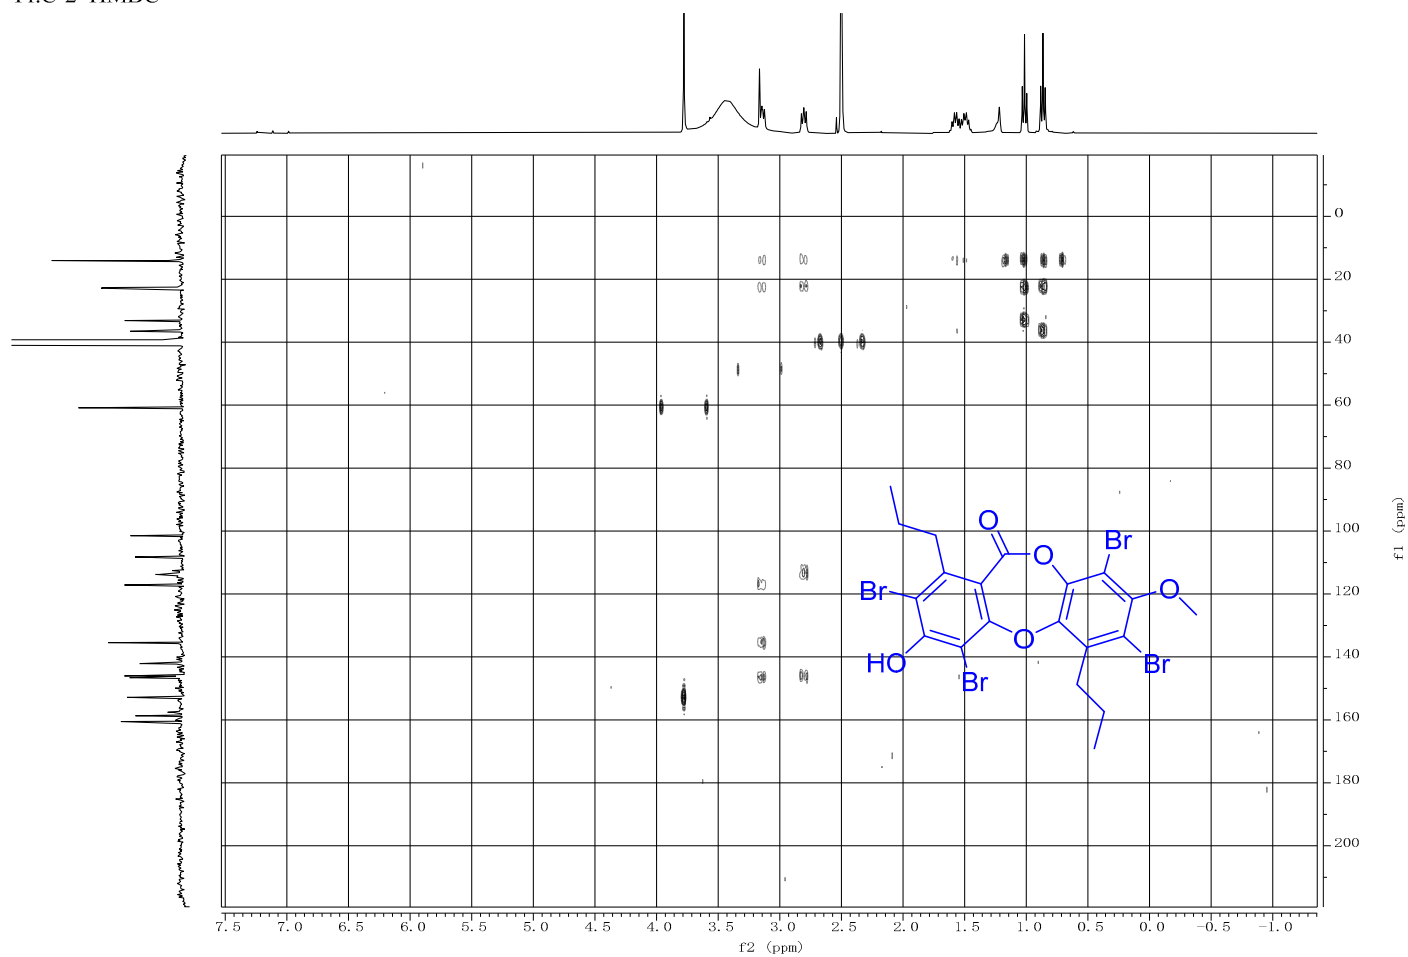

**Figure S69.** HMBC spectrum of **9** in DMSO-*d*<sub>6</sub>

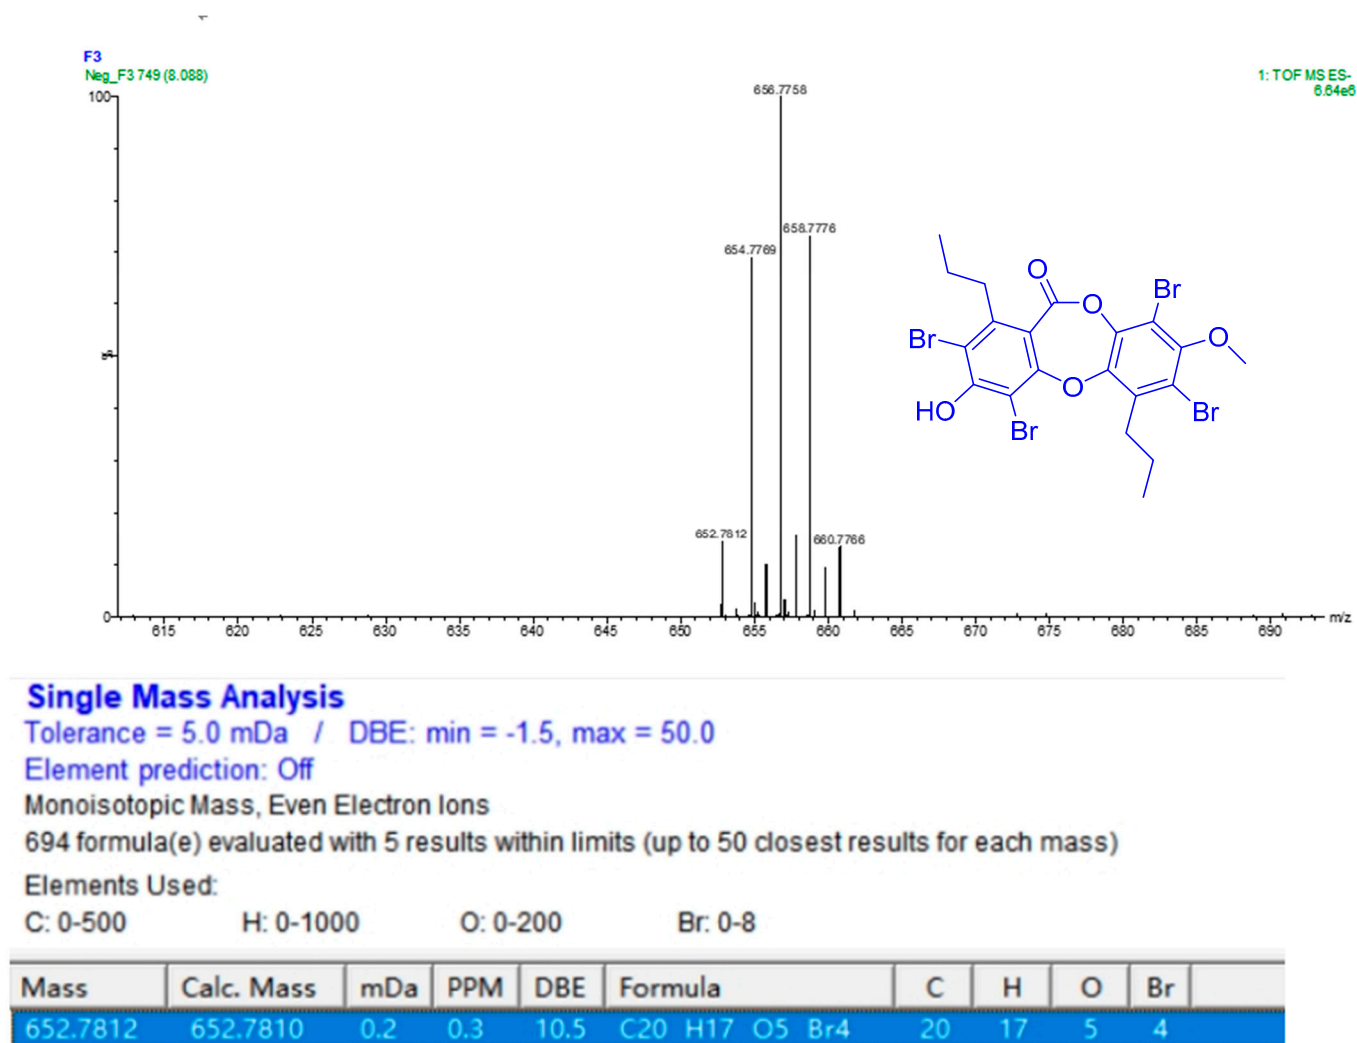

**Figure S70.** HRESIMS spectrum of **9**



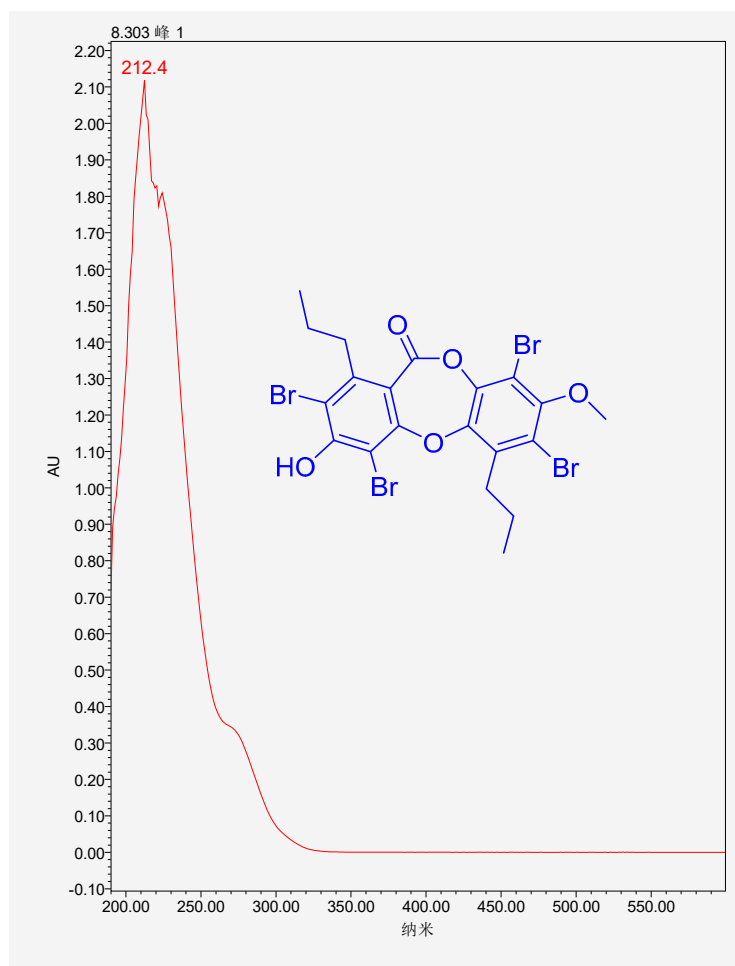

**Figure S71.** UV spectrum of **9**

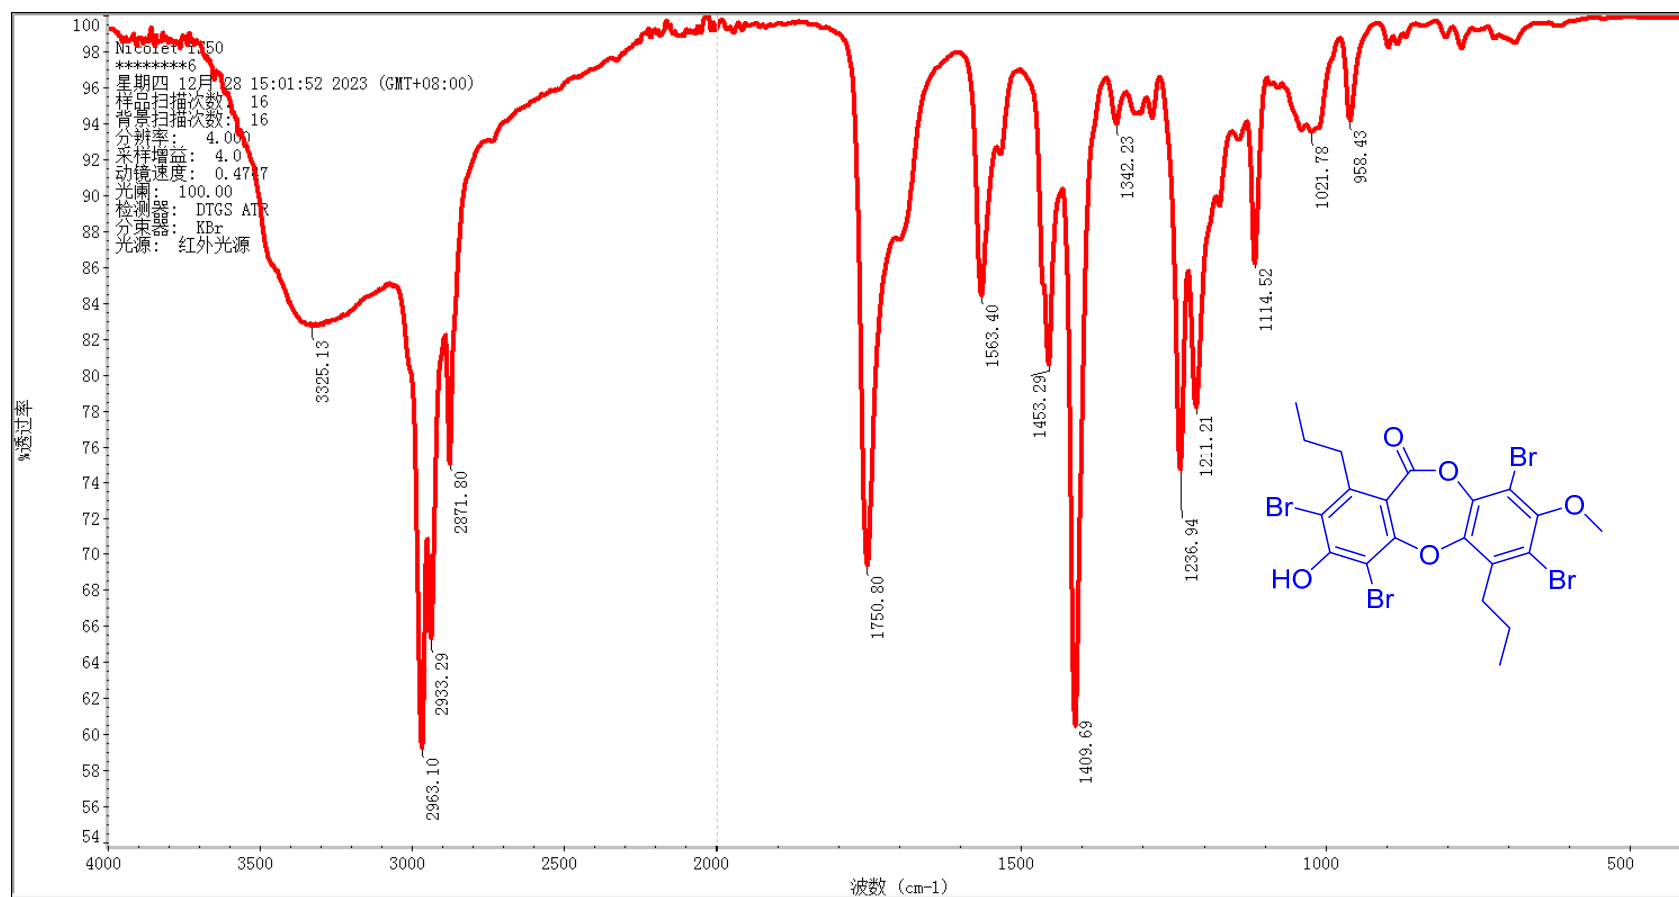

Figure S72. IR spectrum of **9**

**Table S10. <sup>1</sup>H and <sup>13</sup>C NMR data and key COSY and HMBC correlations of 10**

| No. | $\delta_{\text{H}}$ | $\delta_{\text{C}}$   | COSY                                   | HMBC                         |
|-----|---------------------|-----------------------|----------------------------------------|------------------------------|
| 1   |                     | 112.6, C              |                                        |                              |
| 2   |                     | 157.6, C              |                                        |                              |
| 3   |                     | 102.5, C              |                                        |                              |
| 4   |                     | 157.6, C              |                                        |                              |
| 5   |                     | 114.1, C              |                                        |                              |
| 6   |                     | 144.6, C              |                                        |                              |
| 7   |                     | 161.9, C              |                                        |                              |
| 8   | 2.79, m             | 36.1, CH <sub>2</sub> | H <sub>2</sub> -9                      | C-1, C-5, C-6, C-9, C-10     |
| 9   | 1.53, m             | 23.0, CH <sub>2</sub> | H <sub>2</sub> -8, H <sub>3</sub> -10  | C-6, C-8, C-10               |
| 10  | 0.90, t (7.2)       | 14.1, CH <sub>3</sub> | H <sub>2</sub> -9                      | C-8, C-9                     |
| 1'  |                     | 150.1, C              |                                        |                              |
| 2'  |                     | 136.5, C              |                                        |                              |
| 3'  |                     | 135.2, C              |                                        |                              |
| 4'  |                     | 110.8, C              |                                        |                              |
| 5'  |                     | 153.9, C              |                                        |                              |
| 6'  | 7.07, s             | 103.6, C              |                                        | C-1', C-2', C-4', C-5'       |
| 7'  | 2.81, m             | 32.3, CH <sub>2</sub> | H <sub>2</sub> -8'                     | C-2', C-3', C-4', C-8', C-9' |
| 8'  | 1.50, m             | 22.1, CH <sub>2</sub> | H <sub>2</sub> -7', H <sub>3</sub> -9' | C-3', C-7', C-9'             |
| 9'  | 0.90, t (7.2)       | 14.4, CH <sub>3</sub> | H <sub>2</sub> -8'                     | C-7', C-8'                   |
| MeO | 3.85, s             | 57.3, CH <sub>3</sub> |                                        | C-5'                         |

M-16-5 500 MHz DMSO

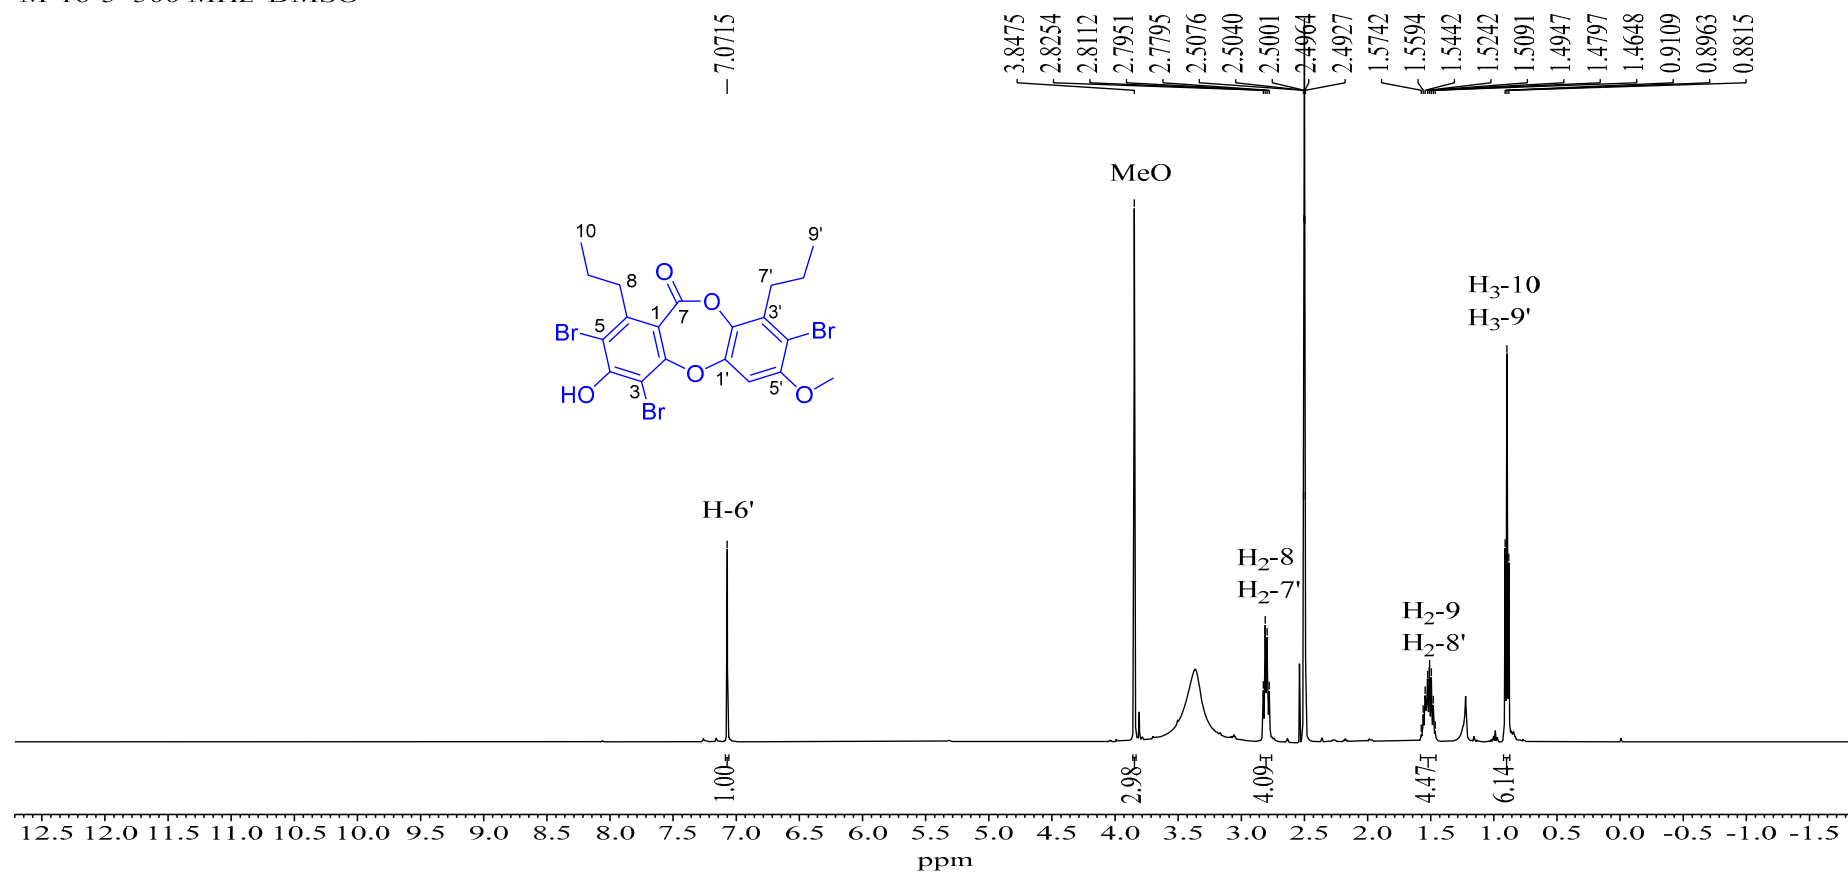

**Figure S73.** <sup>1</sup>H-NMR spectrum of **10** in DMSO-*d*<sub>6</sub> (500 MHz)

M-16-5 C

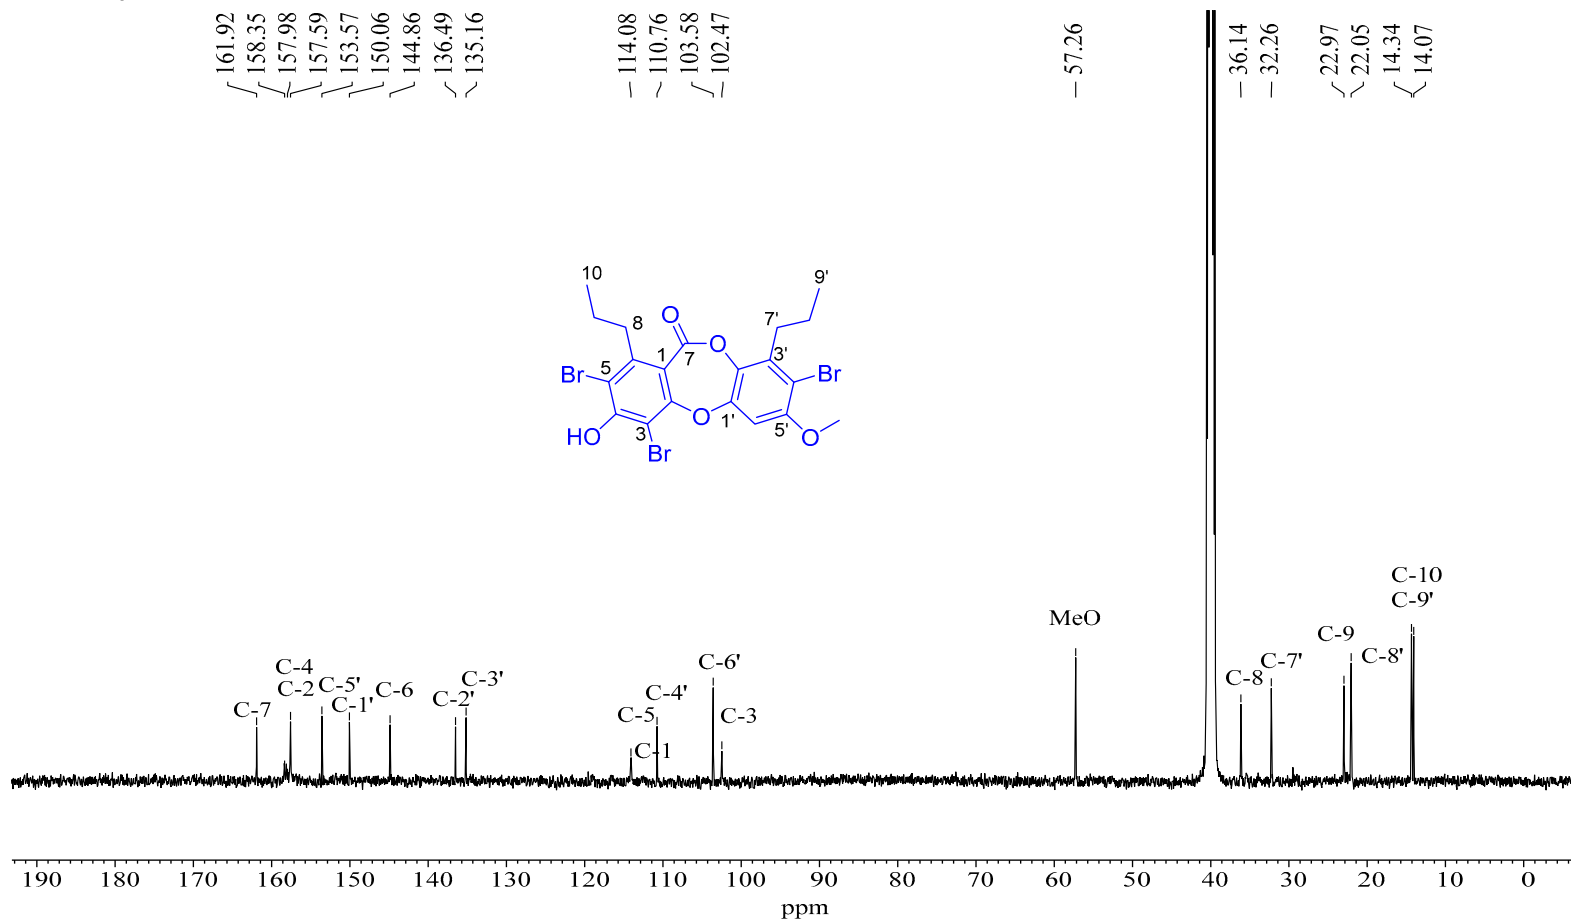

**Figure S74.**  $^{13}\text{C}$ -NMR spectrum of **10** in  $\text{DMSO}-d_6$  (125 MHz)

M-16-5 HSQC

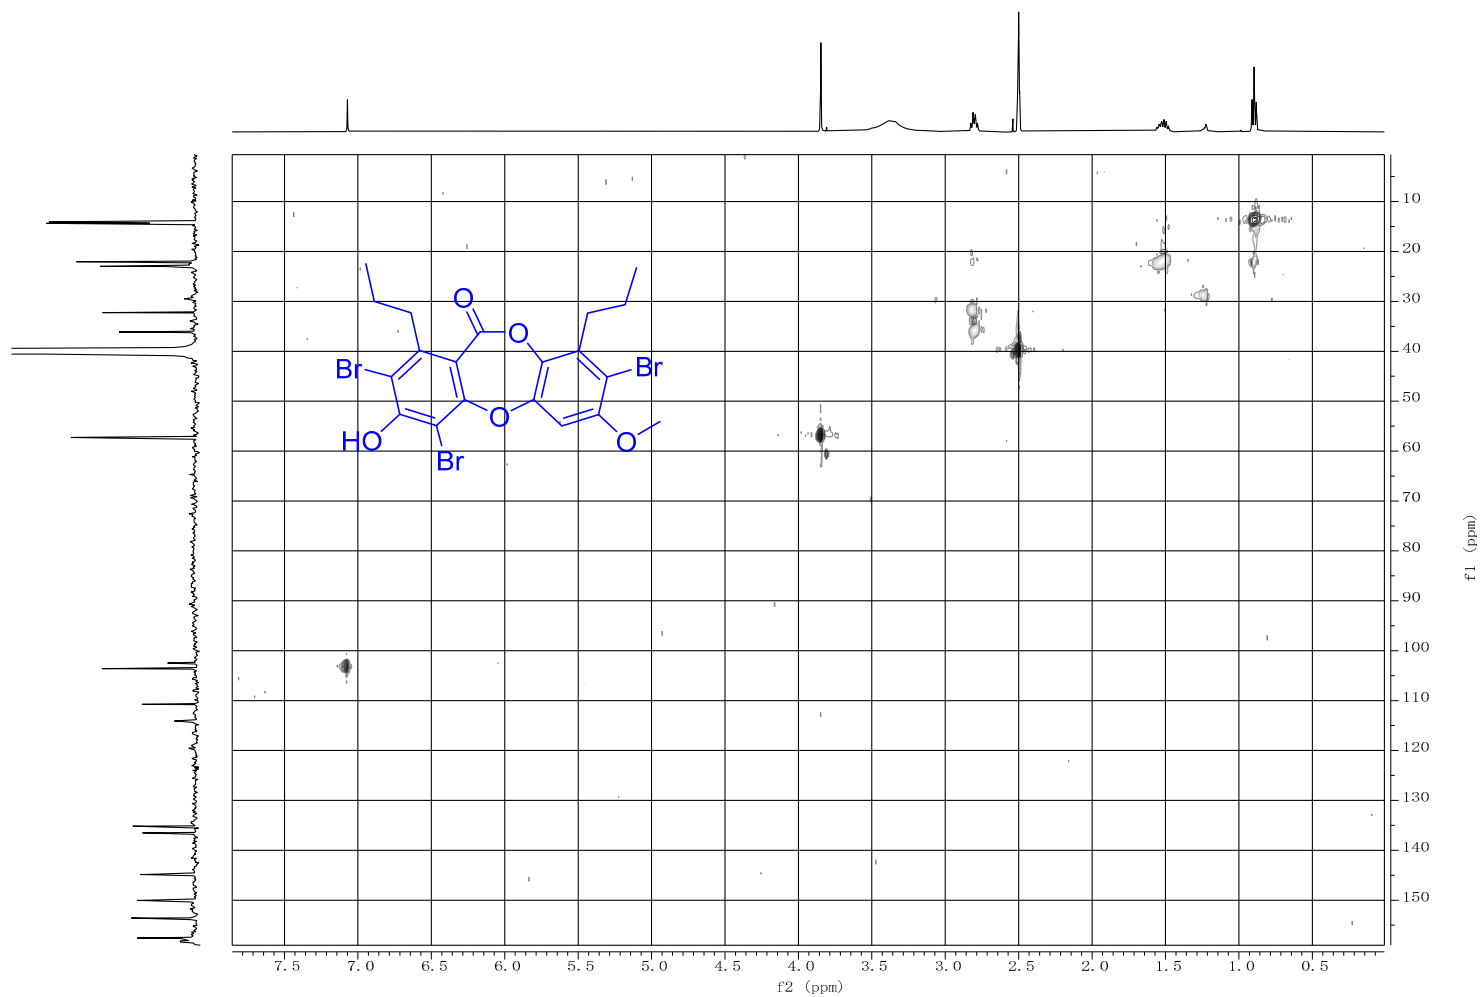

**Figure S75.** HSQC spectrum of **10** in DMSO-*d*<sub>6</sub>

M-16-5 COSY

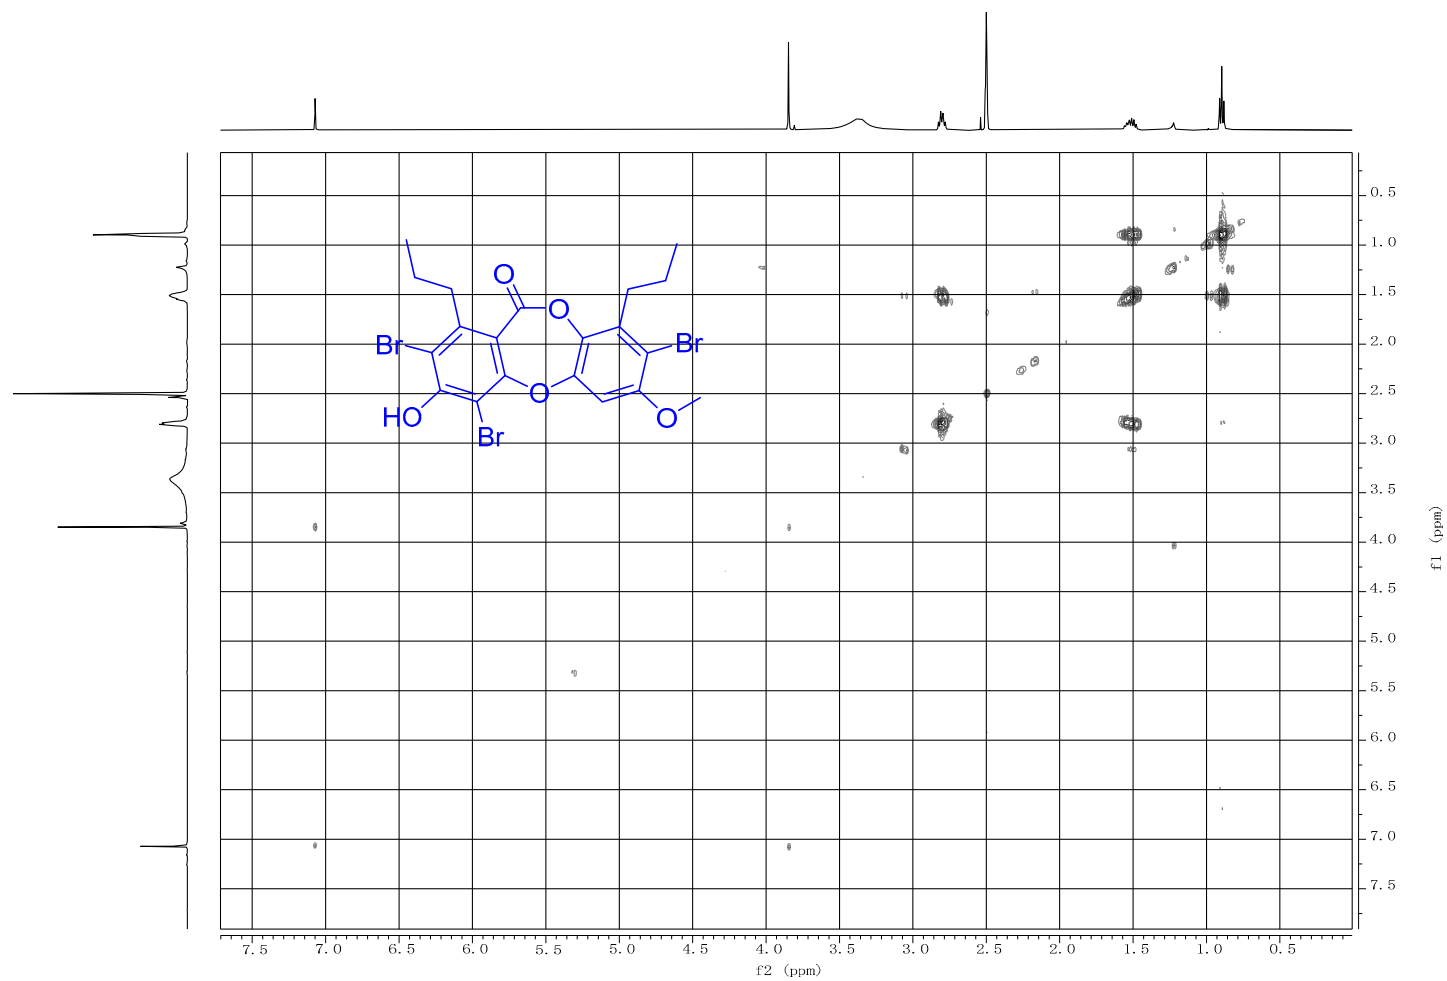

**Figure S76.**  $^1\text{H}$ - $^1\text{H}$  COSY spectrum of **10** in  $\text{DMSO}-d_6$

M-16-5 HMBC

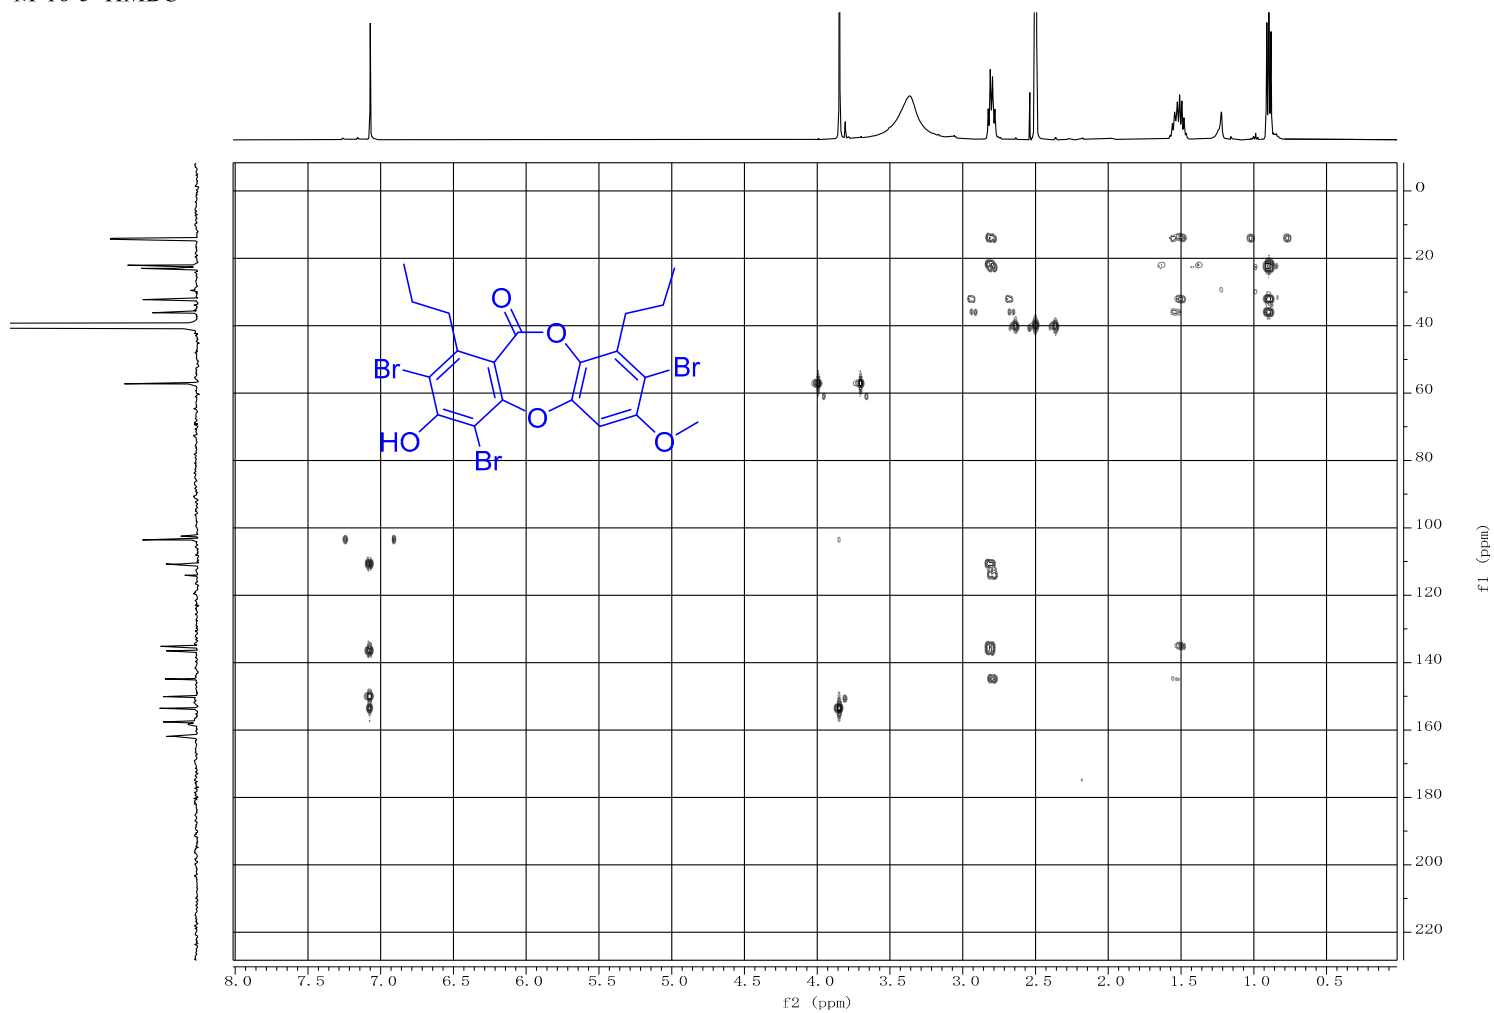

**Figure S77.** HMBC spectrum of **10** in DMSO-*d*<sub>6</sub>



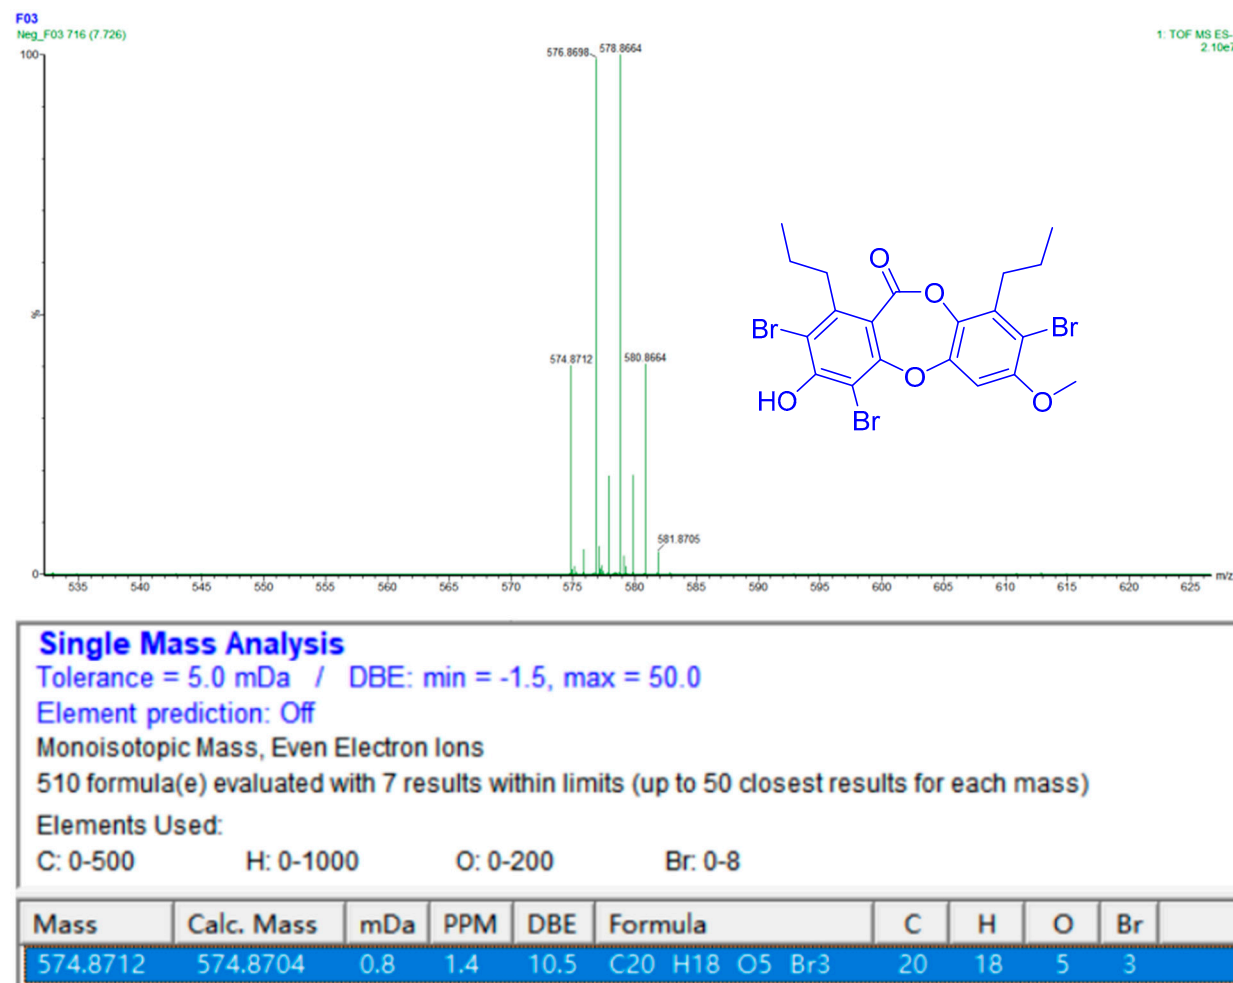

**Figure S78.** HRESIMS spectrum of **10**

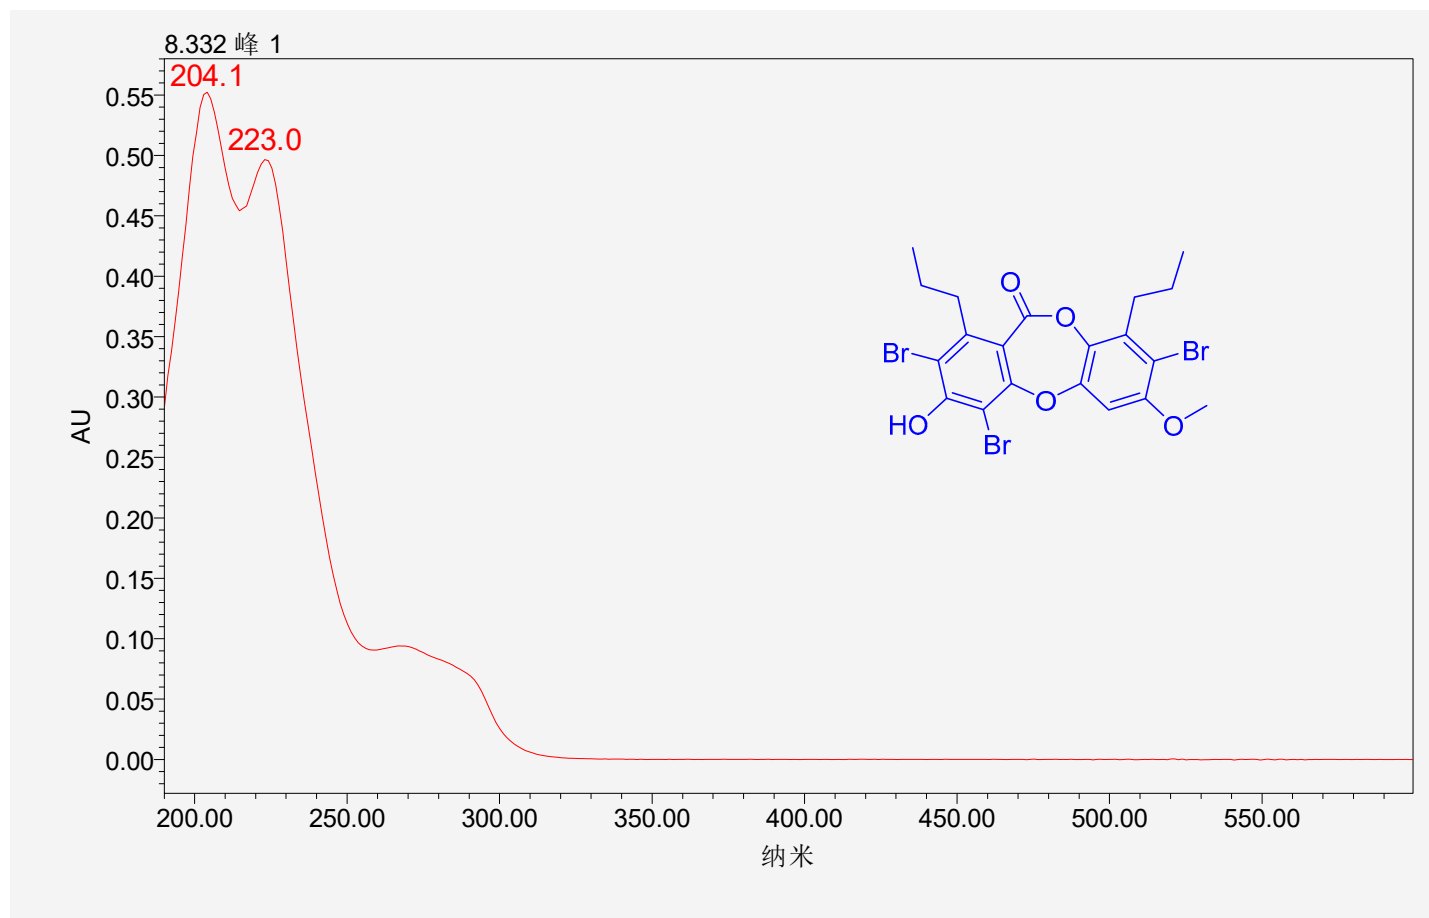

**Figure S79.** UV spectrum of **10**

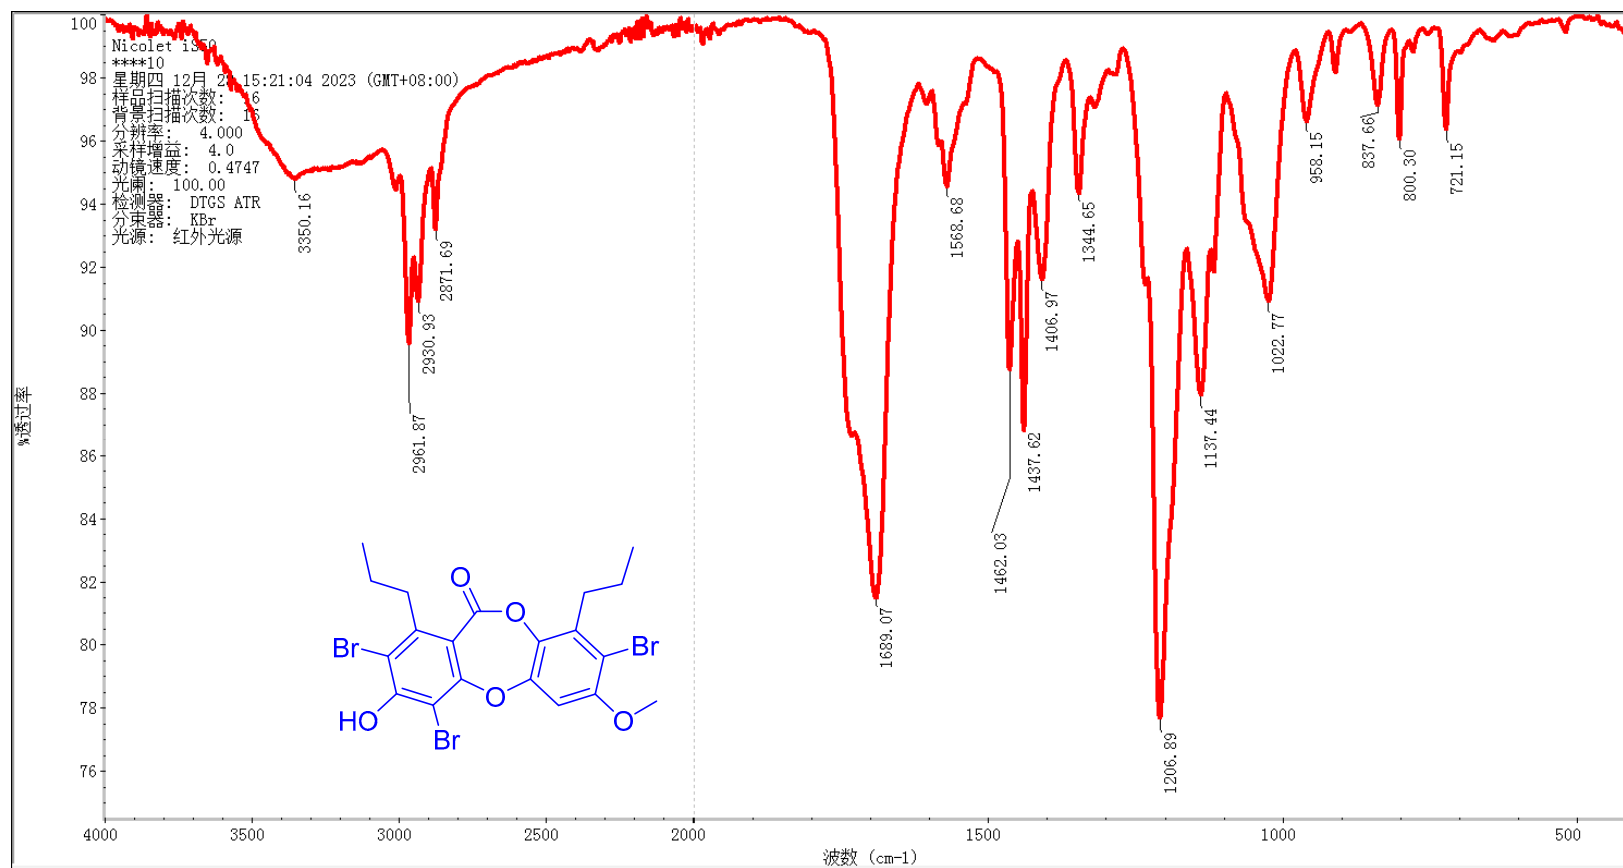

Figure S80. IR spectrum of 10

**Table S11. <sup>1</sup>H and <sup>13</sup>C NMR data and key COSY and HMBC correlations of 11**

| No. | $\delta_{\text{H}}$ | $\delta_{\text{C}}$   | COSY                                   | HMBC                         |
|-----|---------------------|-----------------------|----------------------------------------|------------------------------|
| 1   |                     | 112.2, C              |                                        |                              |
| 2   |                     | 158.9, C              |                                        |                              |
| 3   |                     | 102.2, C              |                                        |                              |
| 4   |                     | 151.1, C              |                                        |                              |
| 5   |                     | 116.2, C              |                                        |                              |
| 6   |                     | 145.7, C              |                                        |                              |
| 7   |                     | 161.6, C              |                                        |                              |
| 8   | 2.72, t (8.0)       | 36.9, CH <sub>2</sub> | H <sub>2</sub> -9                      | C-1, C-5, C-6, C-9, C-10     |
| 9   | 1.56, m             | 23.0, CH <sub>2</sub> | H <sub>2</sub> -8, H <sub>3</sub> -10  | C-6, C-8, C-10               |
| 10  | 0.87, t (7.2)       | 14.5, CH <sub>3</sub> | H <sub>2</sub> -9                      | C-8, C-9                     |
| 1'  |                     | 149.1, C              |                                        |                              |
| 2'  |                     | 141.9, C              |                                        |                              |
| 3'  |                     | 134.0, C              |                                        |                              |
| 4'  |                     | 117.5, C              |                                        |                              |
| 5'  |                     | 152.0, C              |                                        |                              |
| 6'  |                     | 108.3, C              |                                        |                              |
| 7'  | 2.83, t (7.5)       | 32.5, CH <sub>2</sub> | H <sub>2</sub> -8'                     | C-2', C-3', C-4', C-8', C-9' |
| 8'  | 1.54, m             | 22.0, CH <sub>2</sub> | H <sub>2</sub> -7', H <sub>3</sub> -9' | C-3', C-7', C-9'             |
| 9'  | 0.92, t (7.2)       | 14.0, CH <sub>3</sub> | H <sub>2</sub> -8'                     | C-7', C-8'                   |
| MeO | 3.78, s             | 60.8, CH <sub>3</sub> |                                        | C-5'                         |

Fr.C-3 600 MHz DMSO

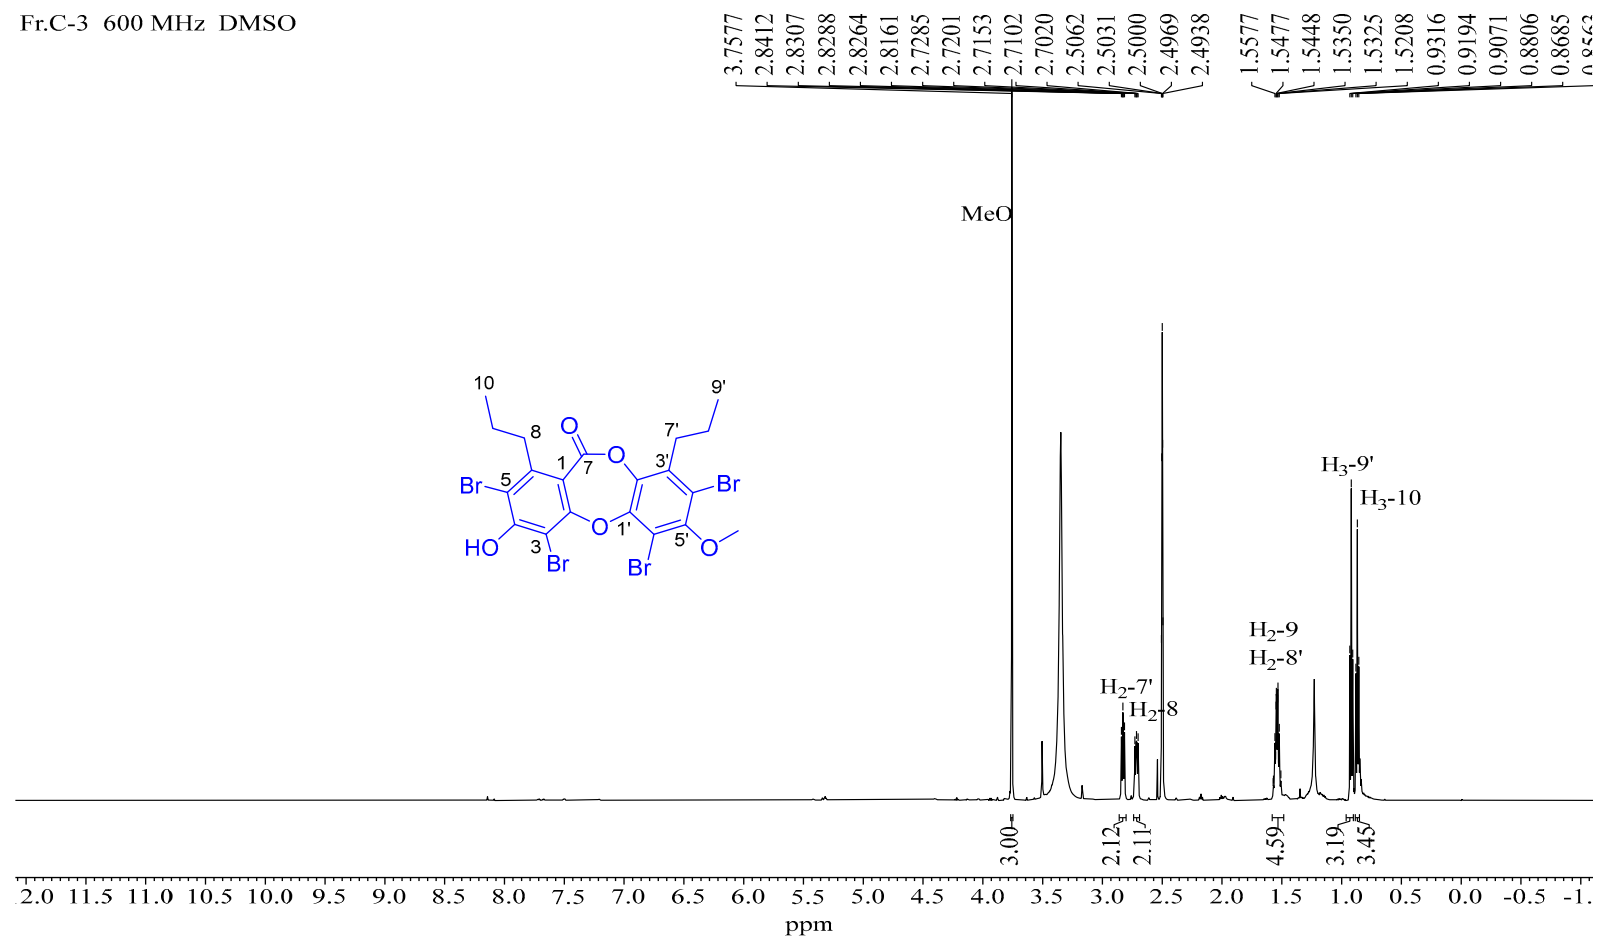

**Figure S81.**  $^1\text{H}$ -NMR spectrum of **11** in DMSO- $d_6$  (600 MHz)

Fr.C-3 C

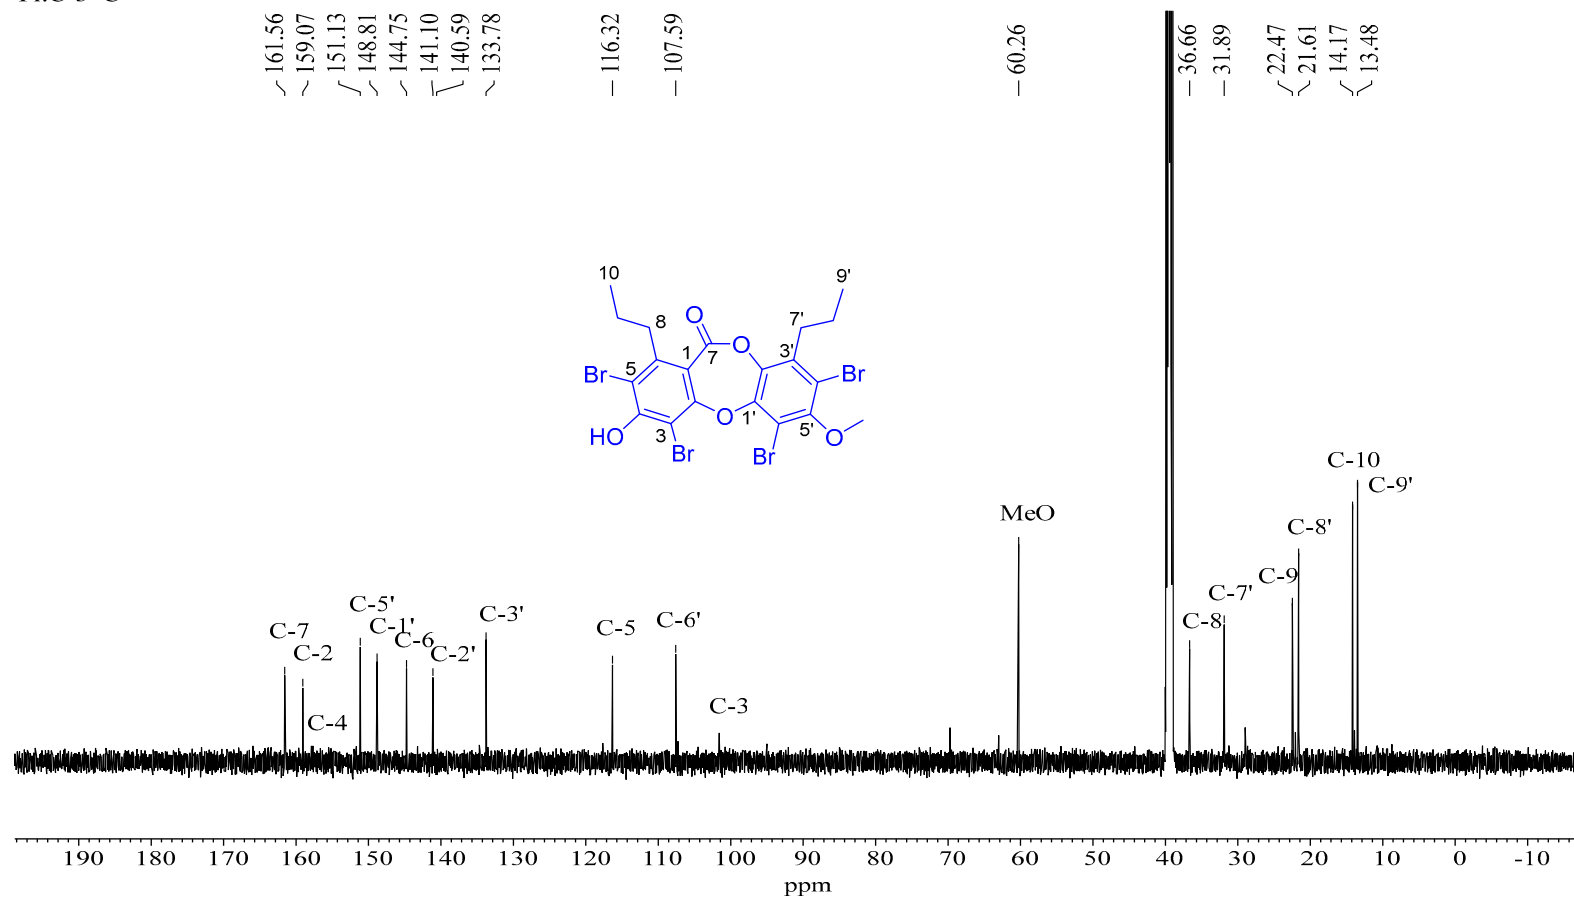

**Figure S82.**  $^{13}\text{C}$ -NMR spectrum of **11** in  $\text{DMSO}-d_6$  (150 MHz)

Fr.C-3 HSQC

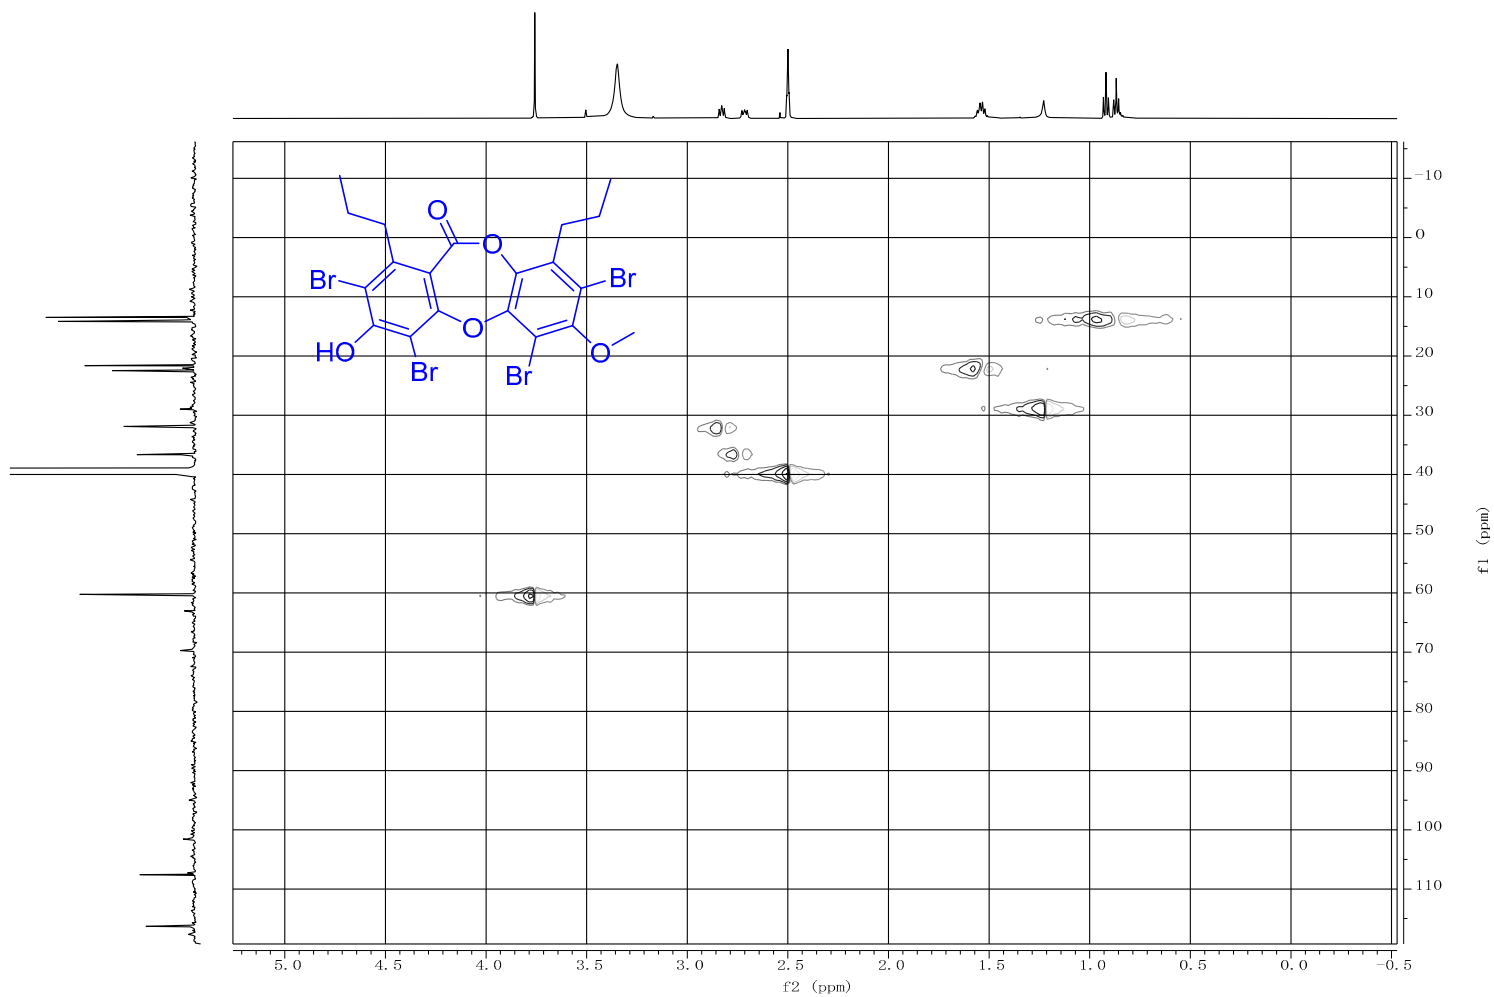

**Figure S83.** HSQC spectrum of **11** in DMSO-*d*<sub>6</sub>

Fr.C-3 COSY

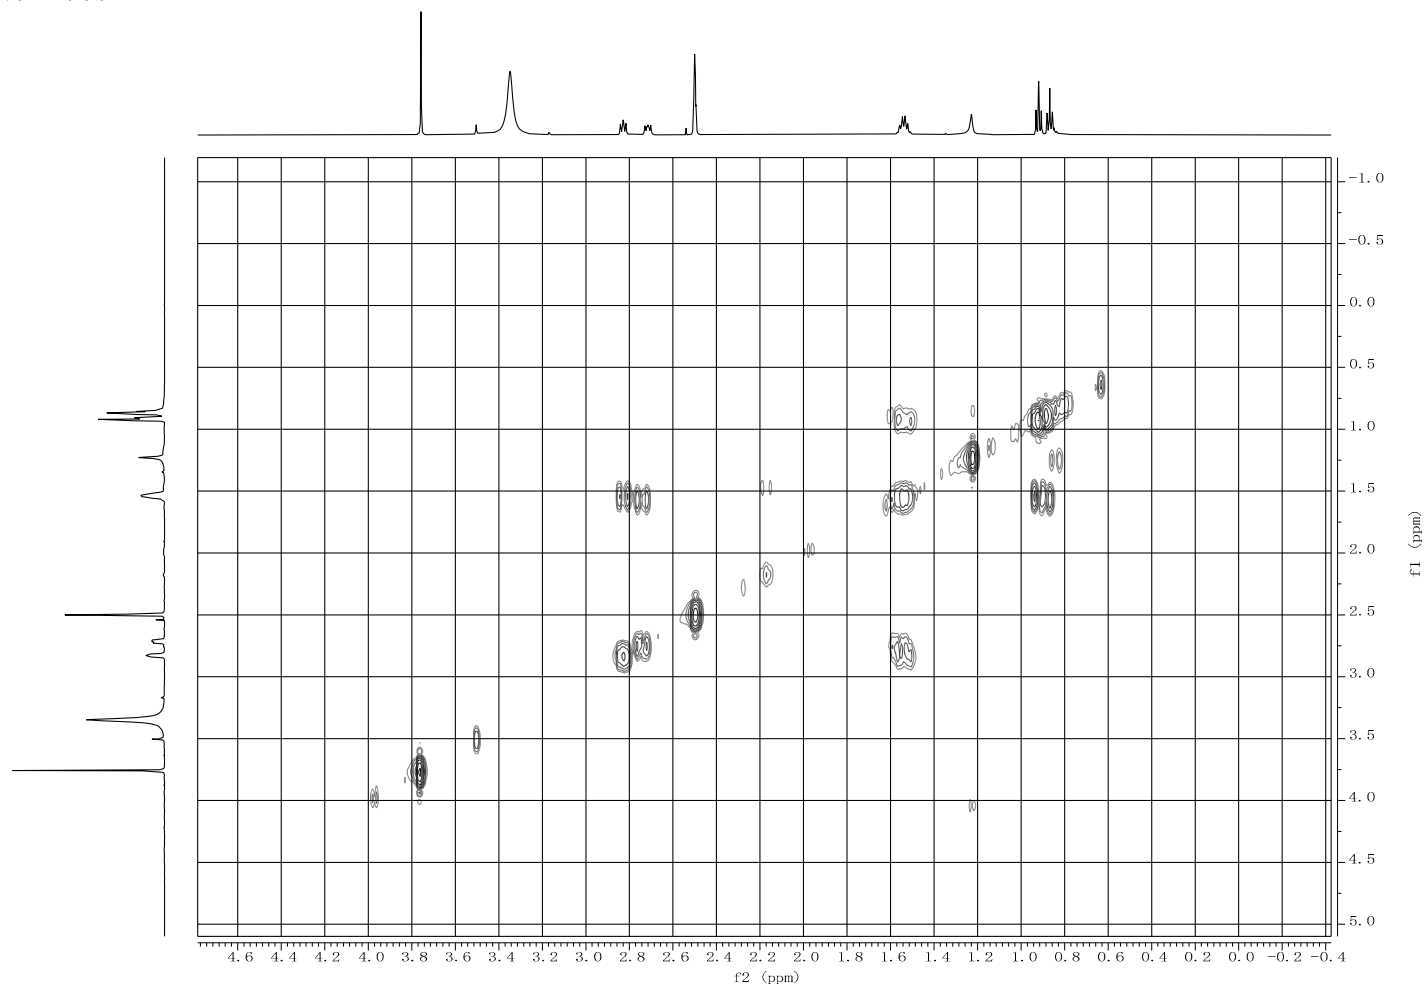

**Figure S84.**  $^1\text{H}$ - $^1\text{H}$  COSY spectrum of **11** in  $\text{DMSO-}d_6$



Fr.C-3 HMBC

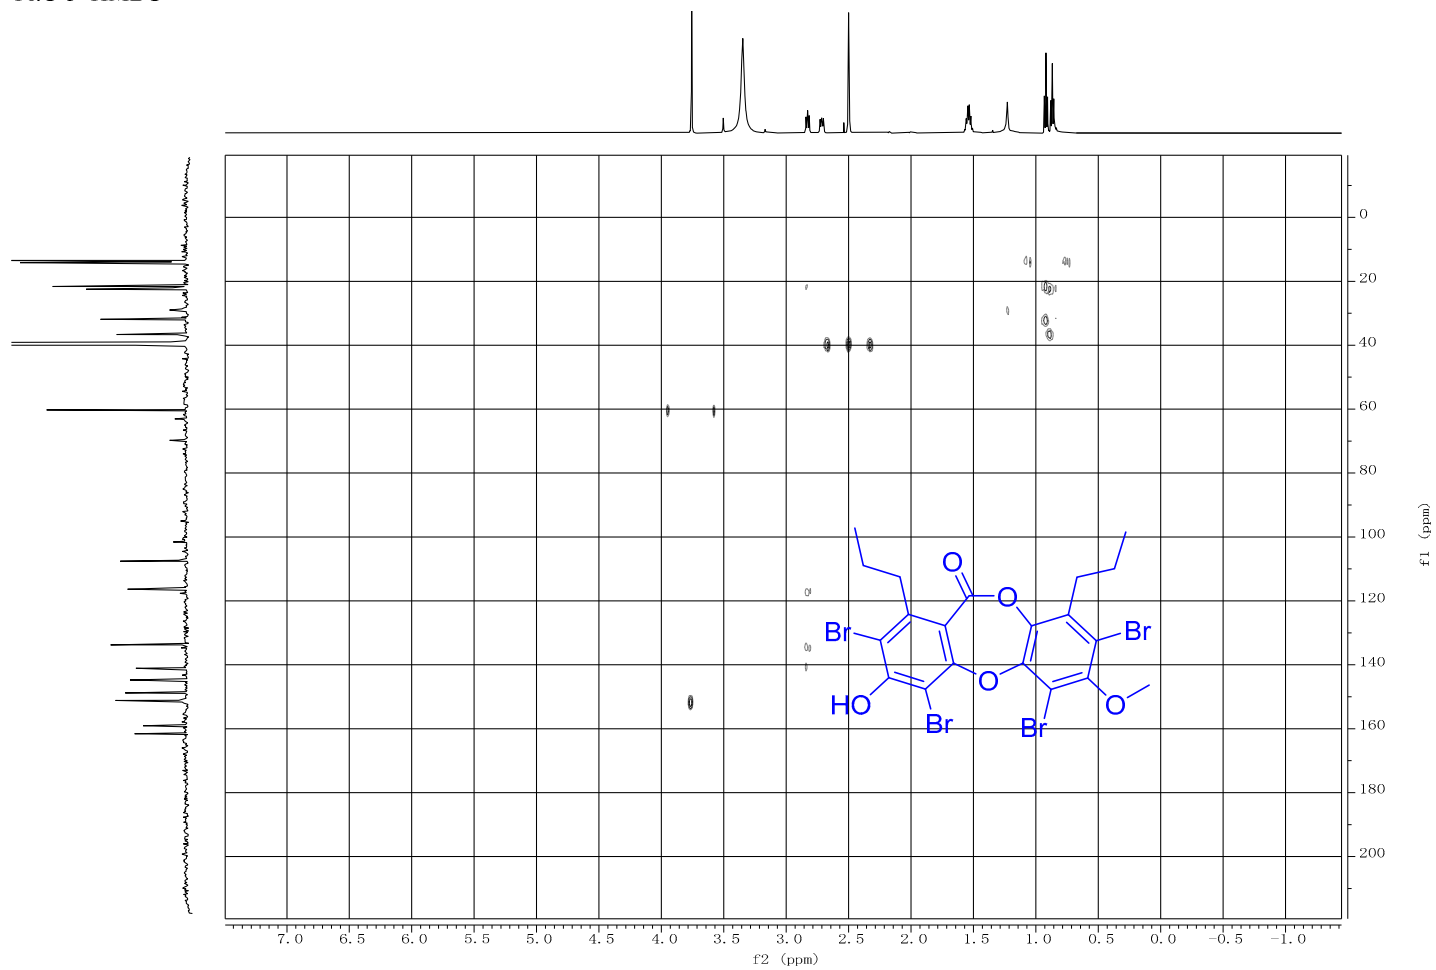

**Figure S85.** HMBC spectrum of **11** in DMSO-*d*<sub>6</sub>

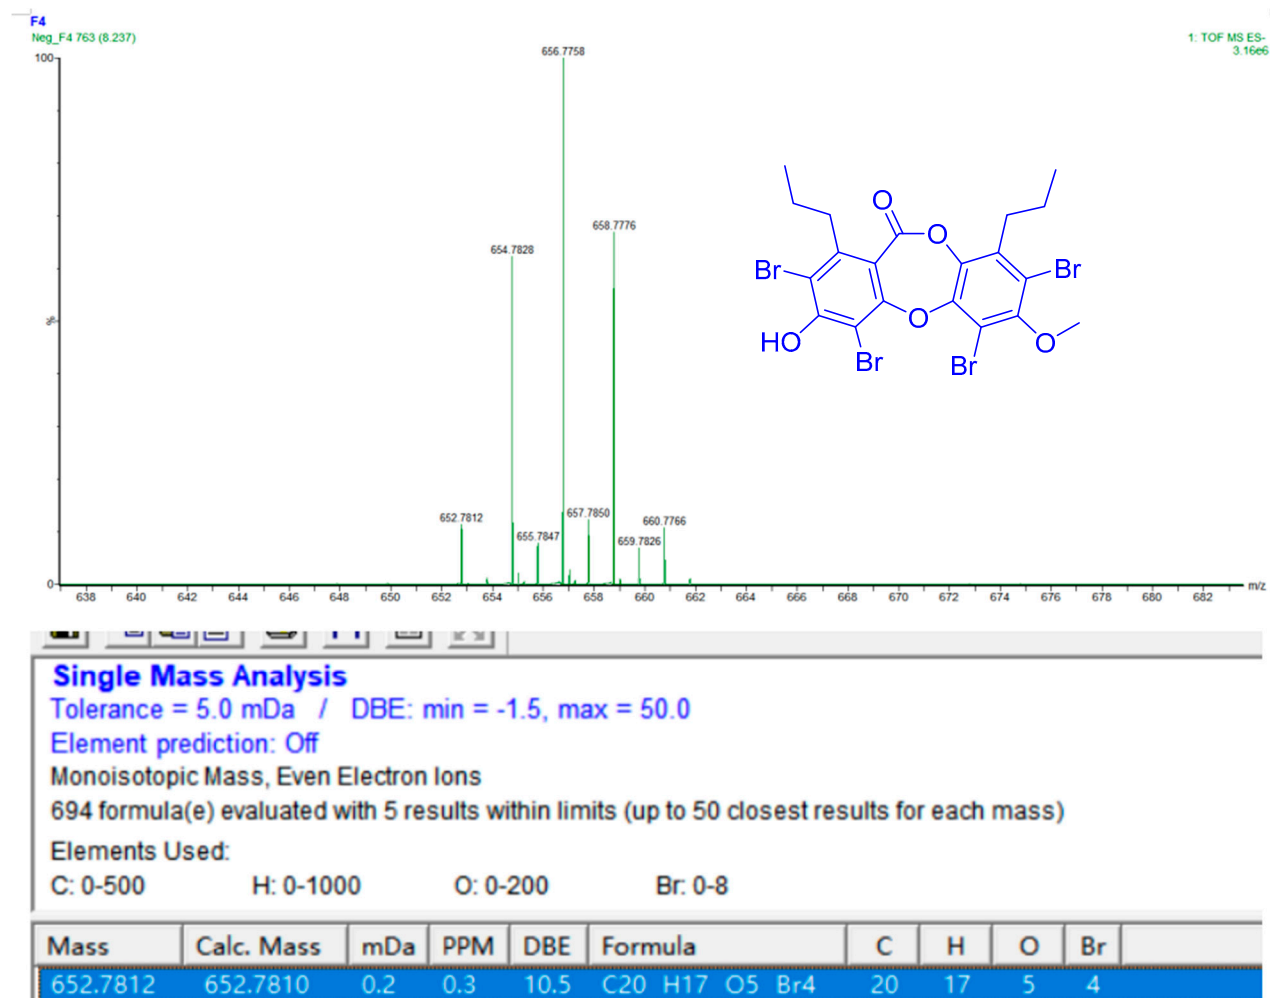

**Figure S86.** HRESIMS spectrum of **11**

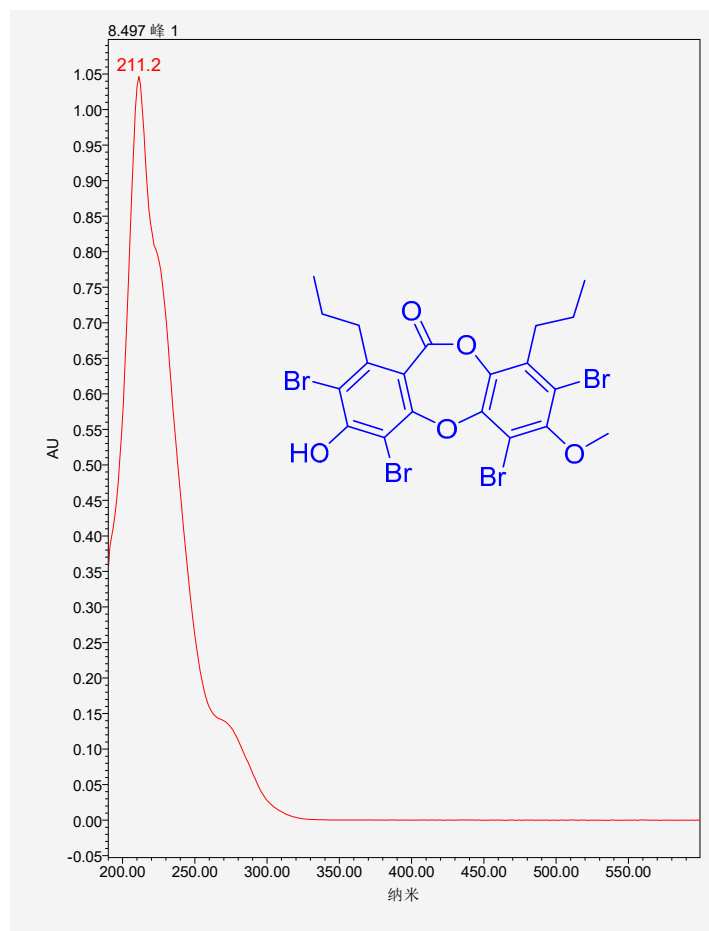

**Figure S87.** UV spectrum of **11**

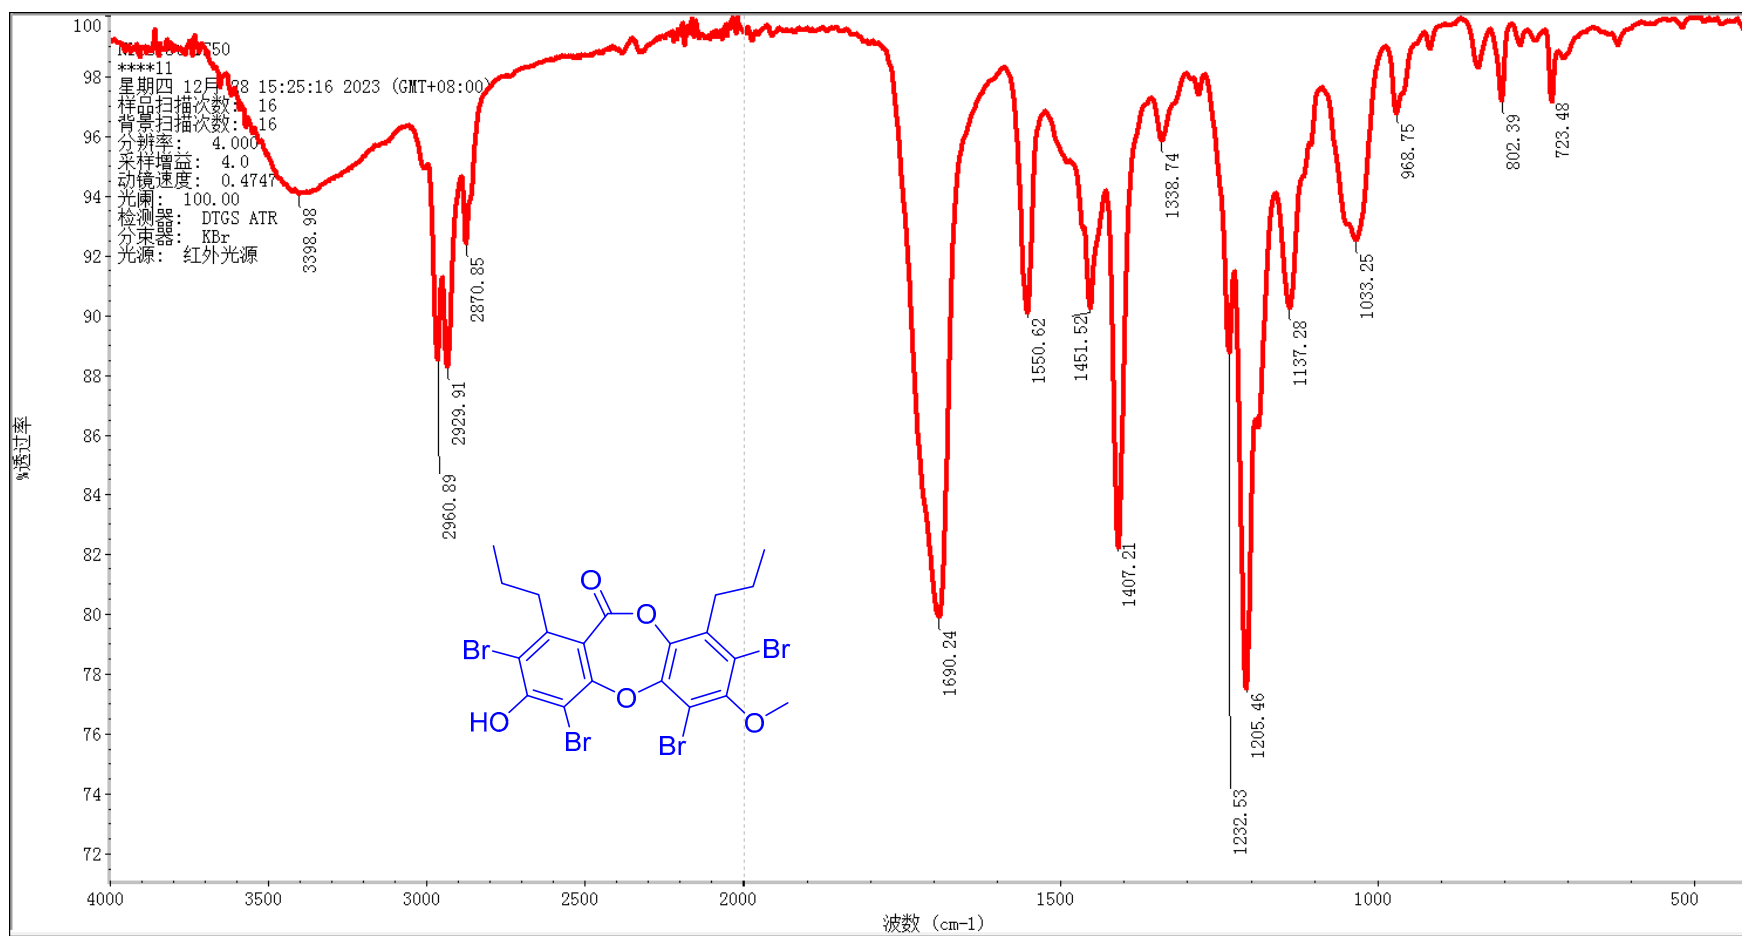

Figure S88. IR spectrum of 11

N-3-4 500 MHz DMSO

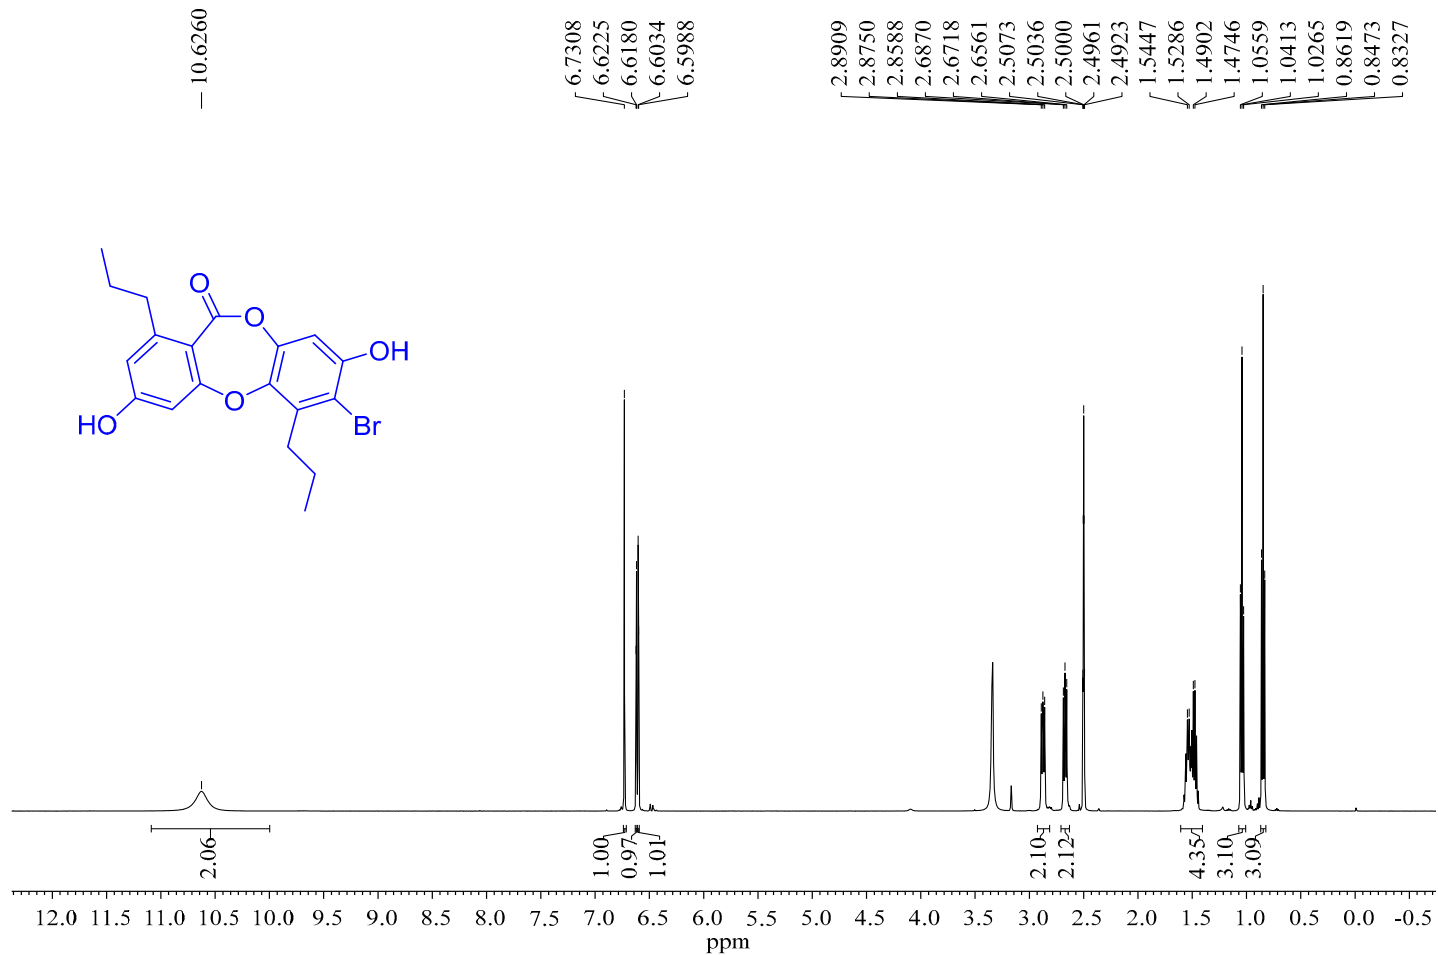

**Figure S89.**  $^1\text{H}$ -NMR spectrum of **12** in  $\text{DMSO-}d_6$  (500 MHz)

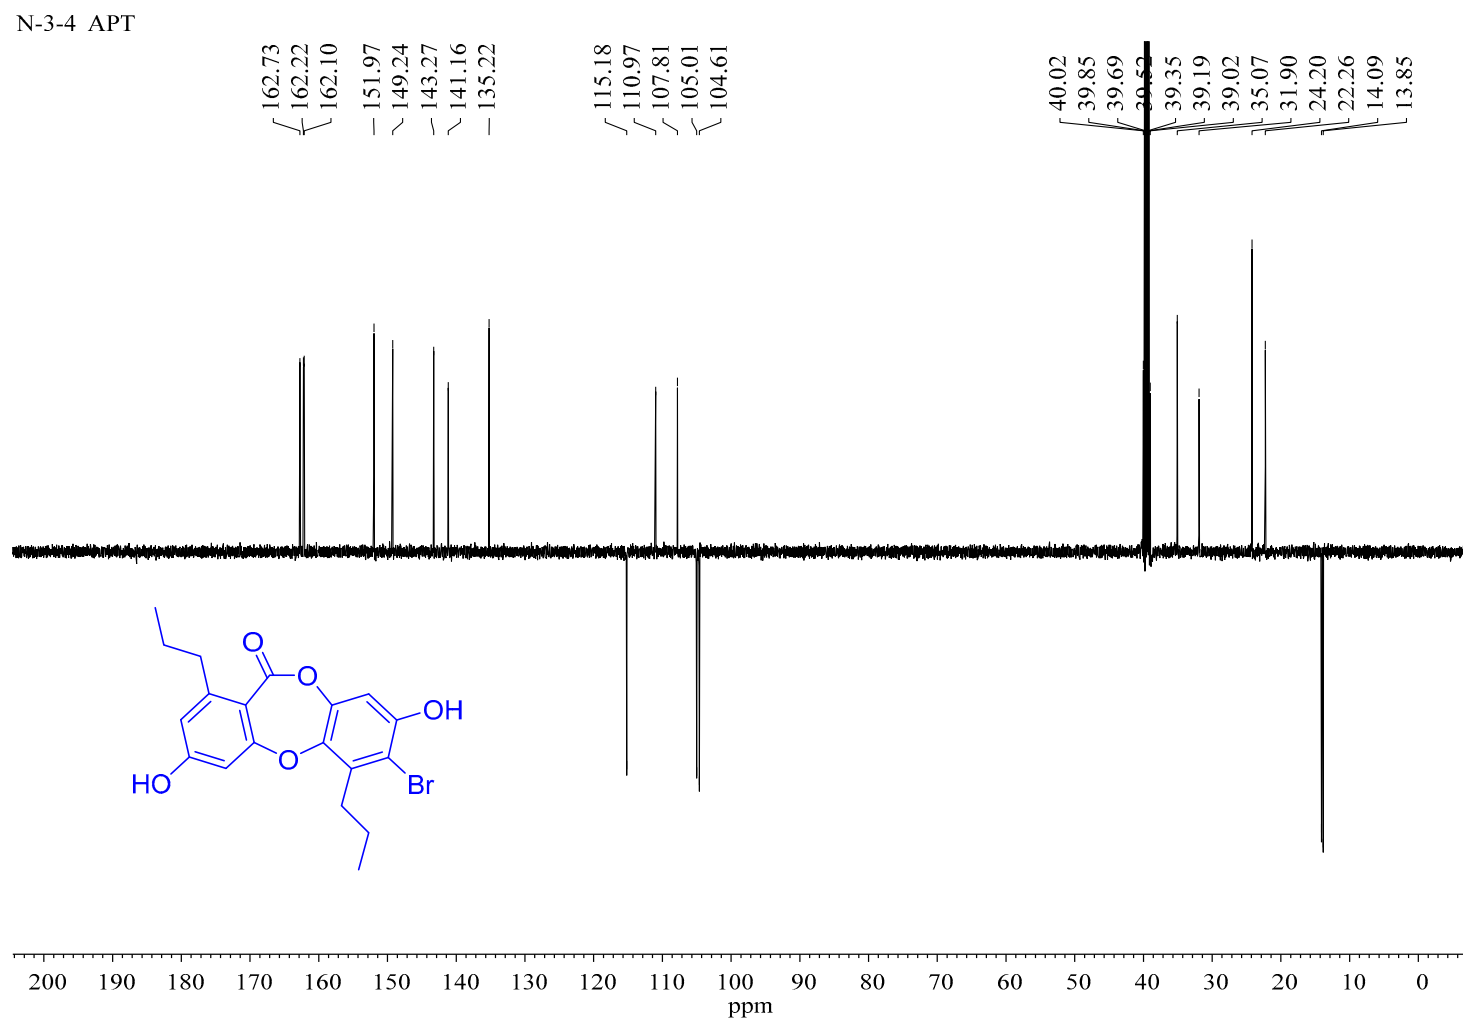

**Figure S90.** APT spectrum of **12** in DMSO-*d*<sub>6</sub> (125 MHz)

N-3-4 HSQC

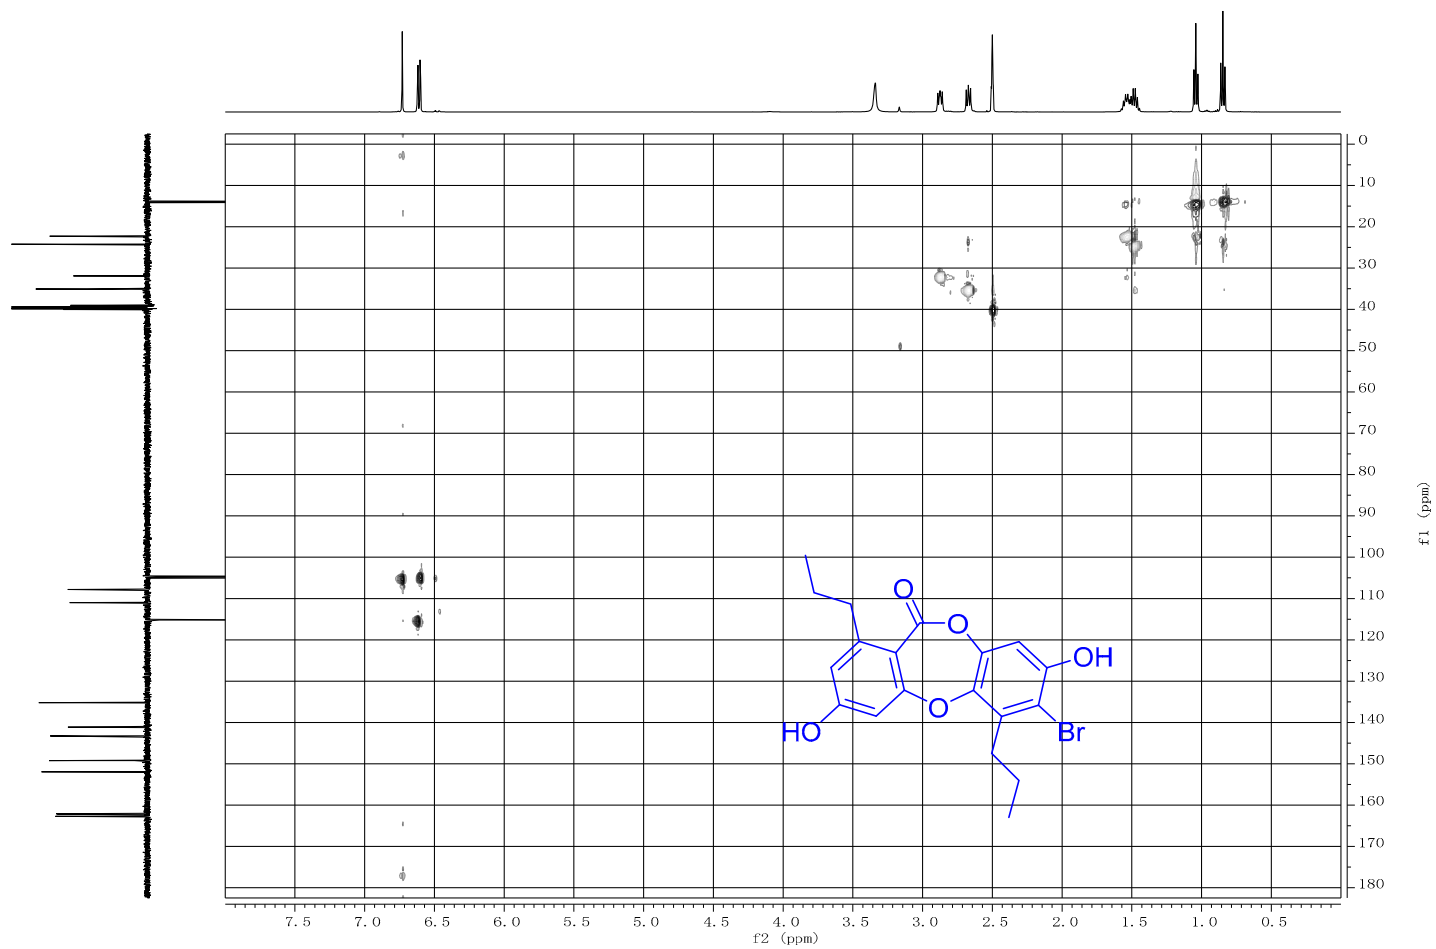

**Figure S91.** HSQC spectrum of **12** in DMSO-*d*<sub>6</sub>

N-3-4 COSY

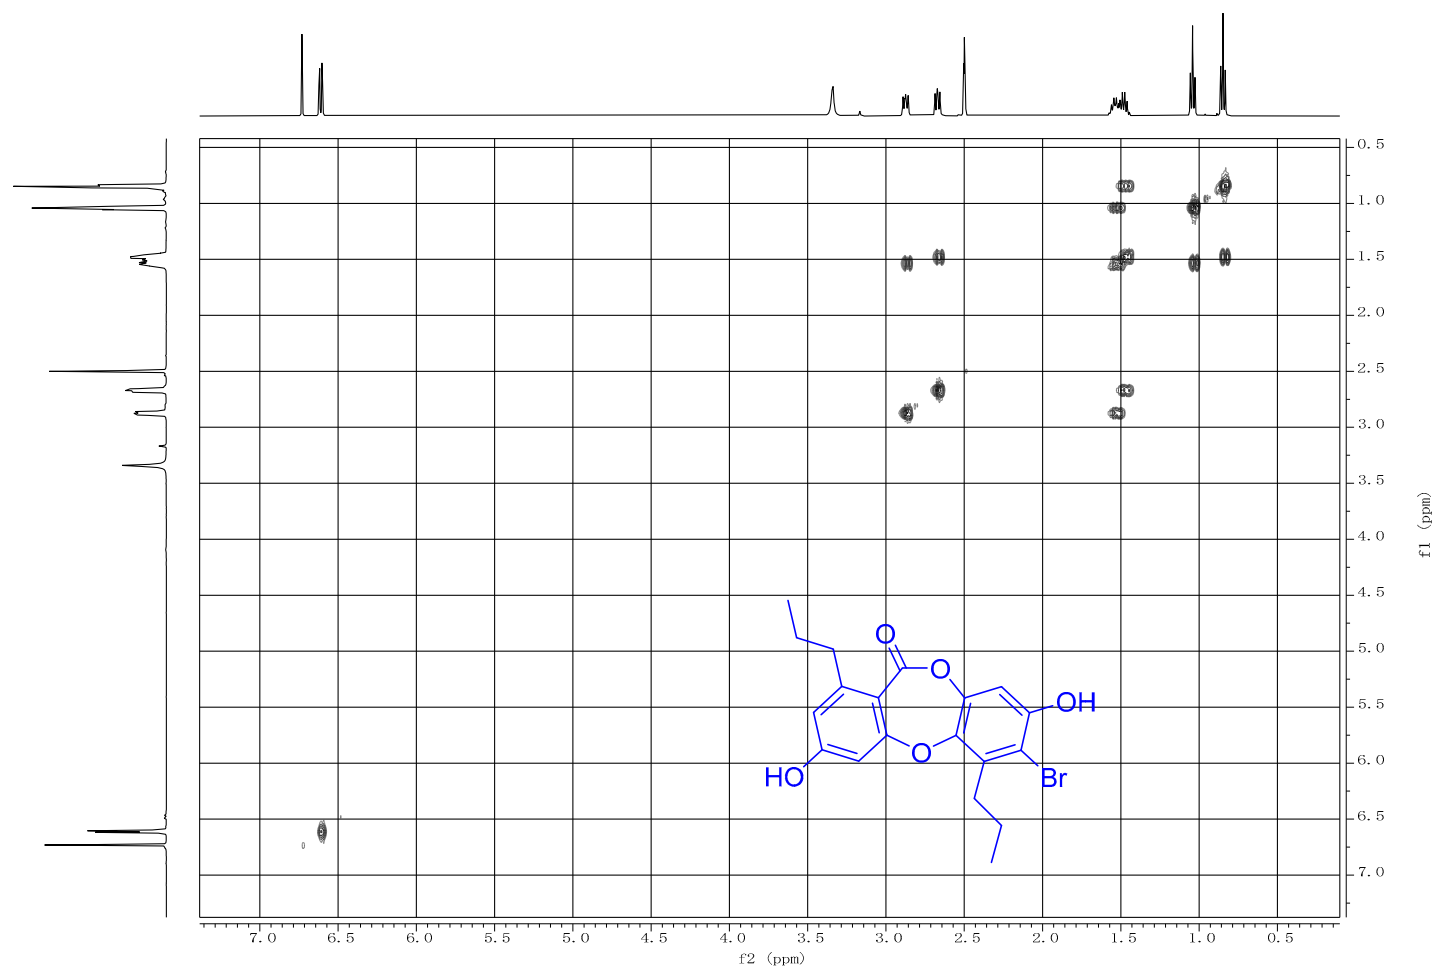

**Figure S92.**  $^1\text{H}$ - $^1\text{H}$  COSY spectrum of **12** in  $\text{DMSO-}d_6$



N-3-4 HMBC

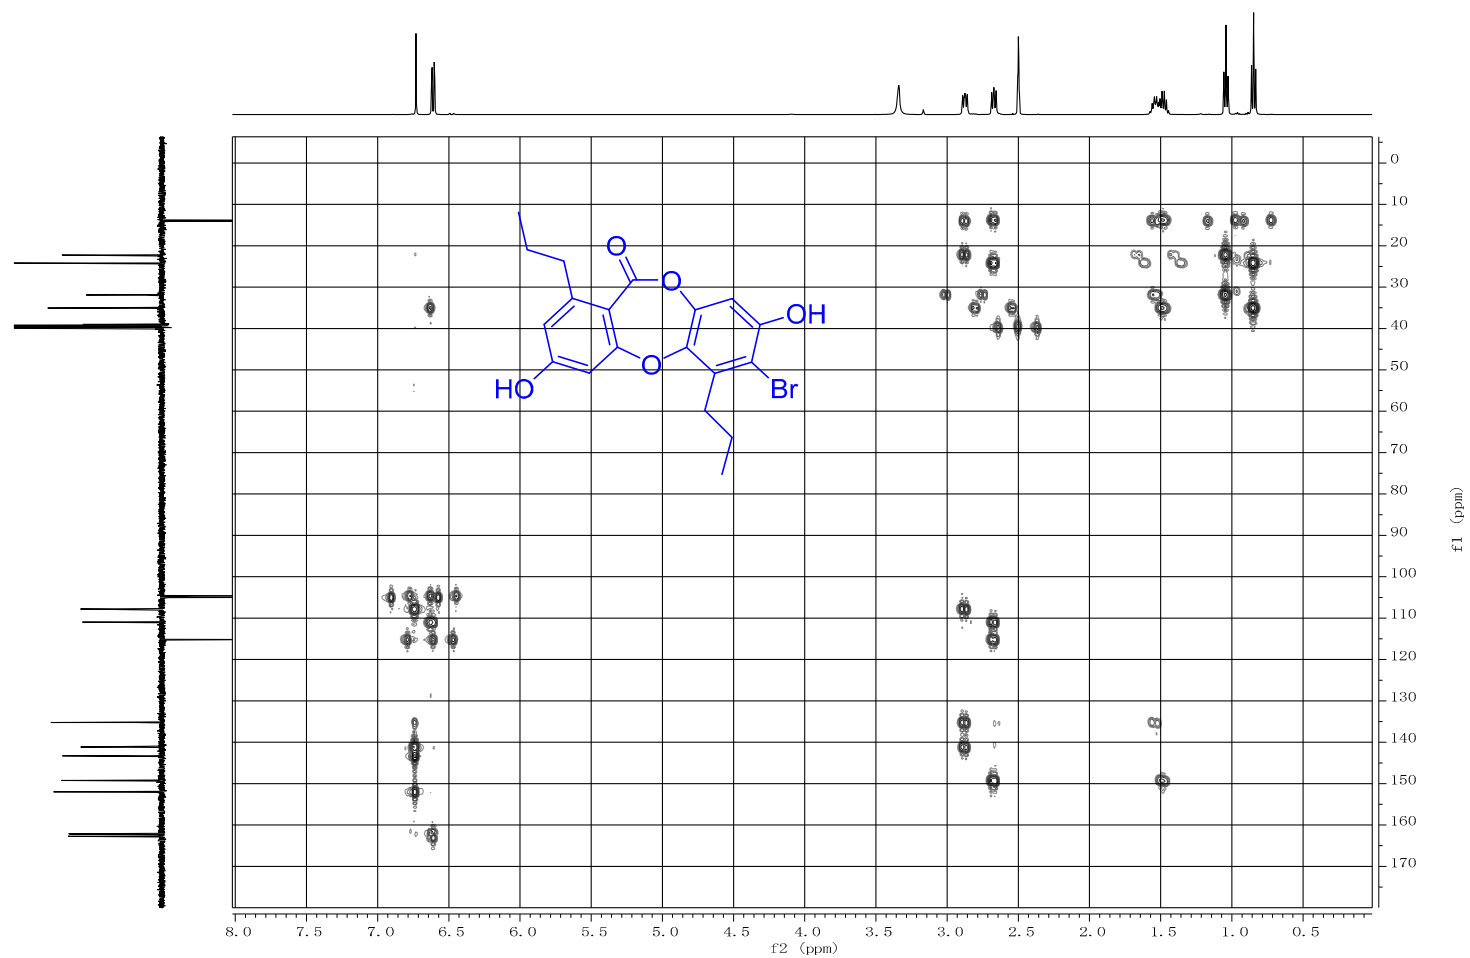

**Figure S93.** HMBC spectrum of **12** in DMSO-*d*<sub>6</sub>

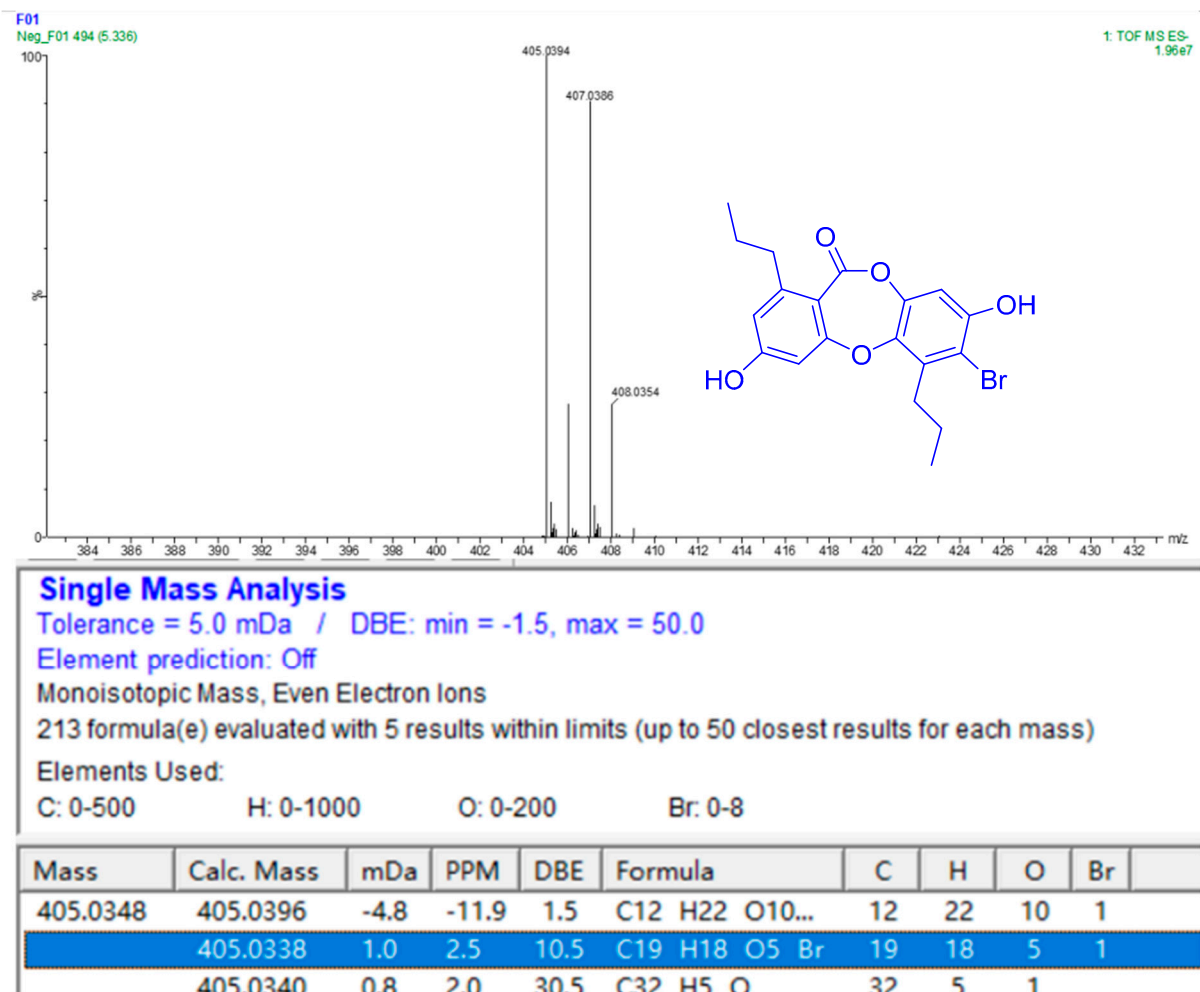

Figure S94. HRESIMS spectrum of 12

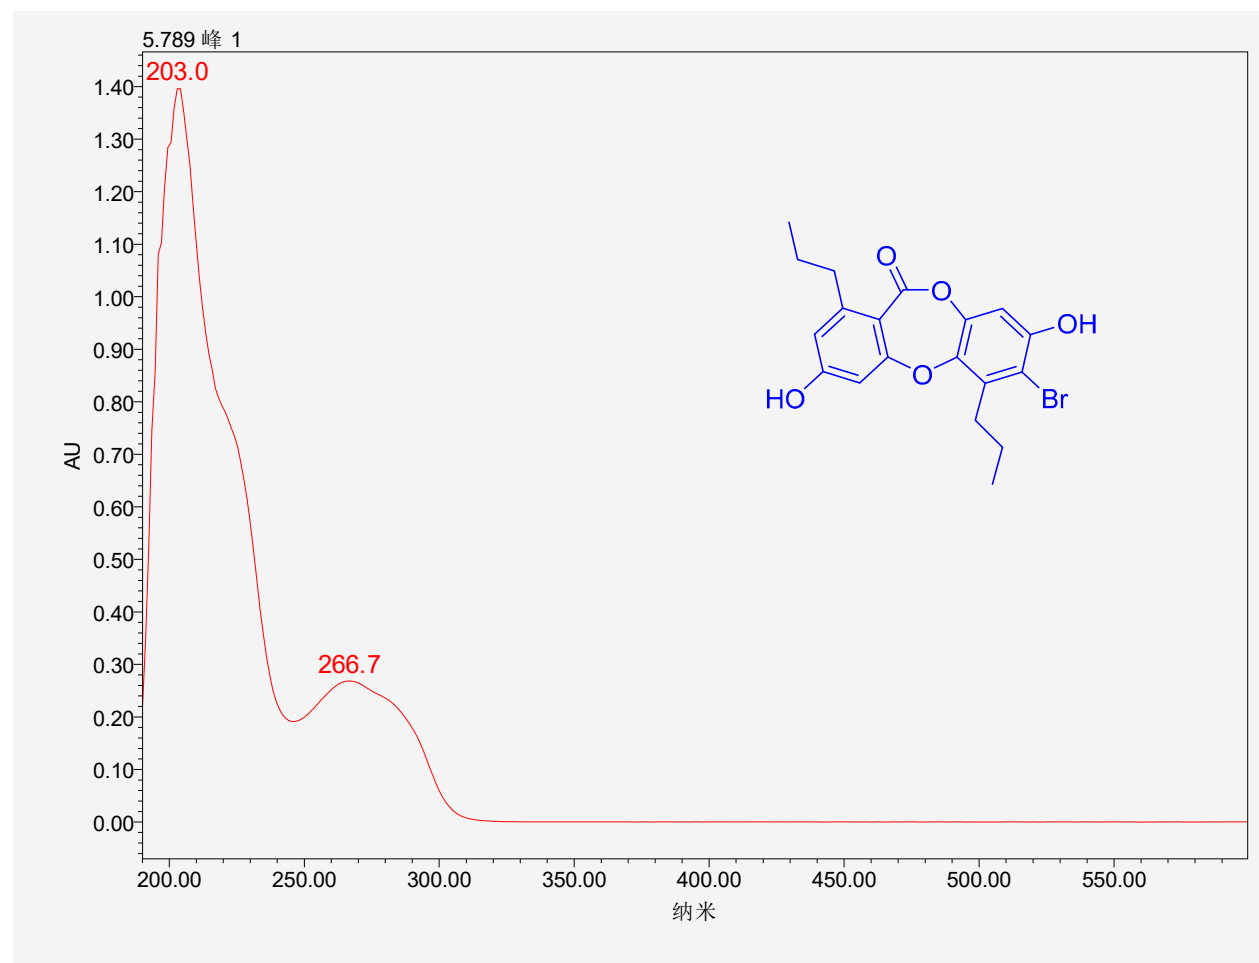

**Figure S95.** UV spectrum of **12**

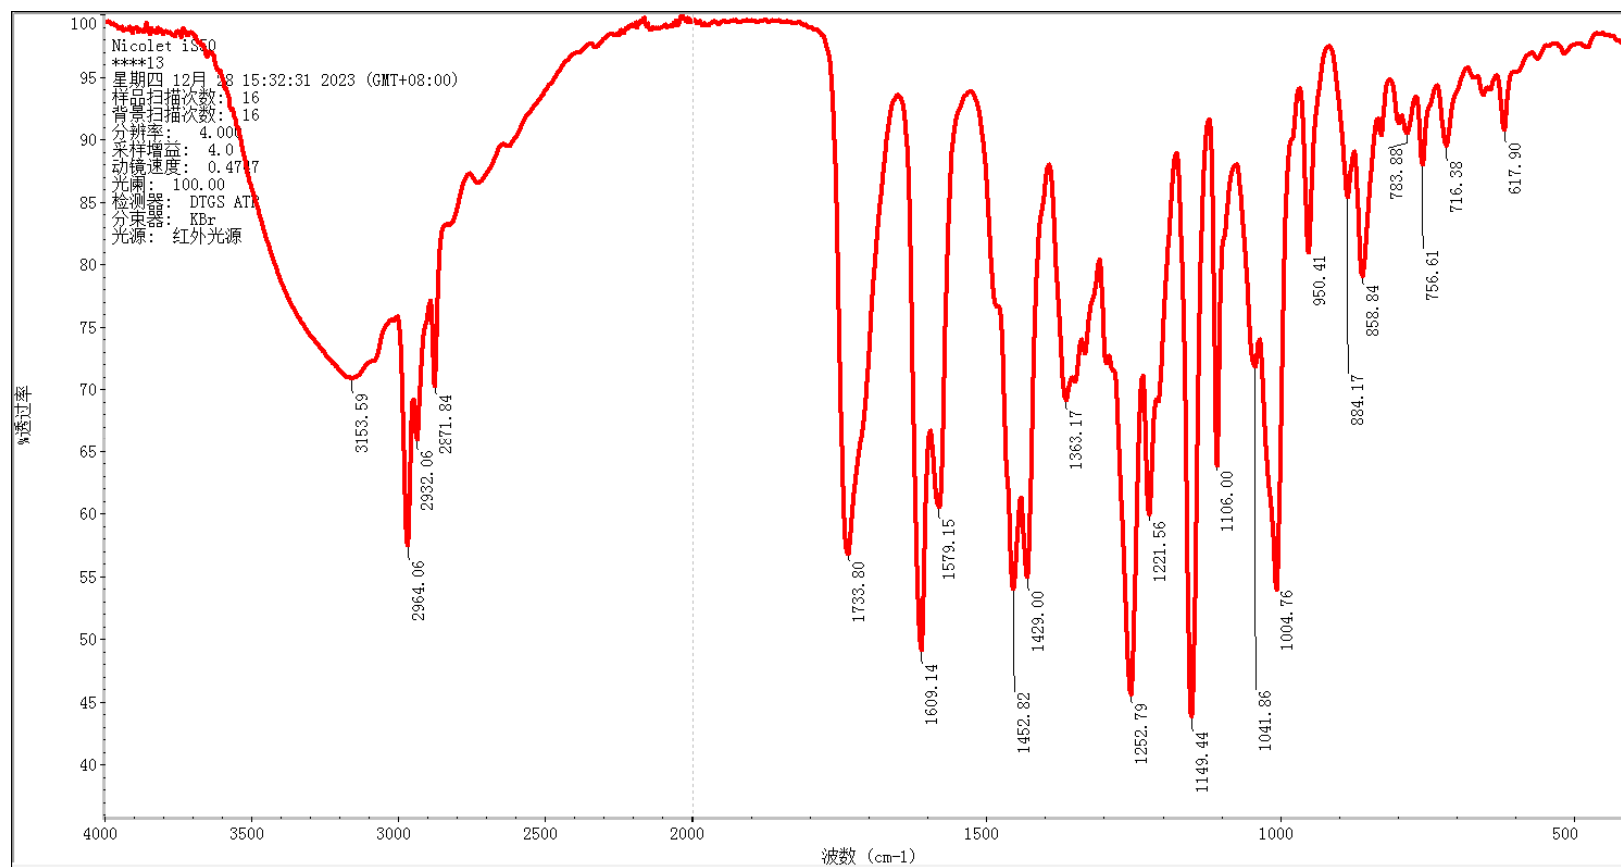

Figure S96. IR spectrum of **12**

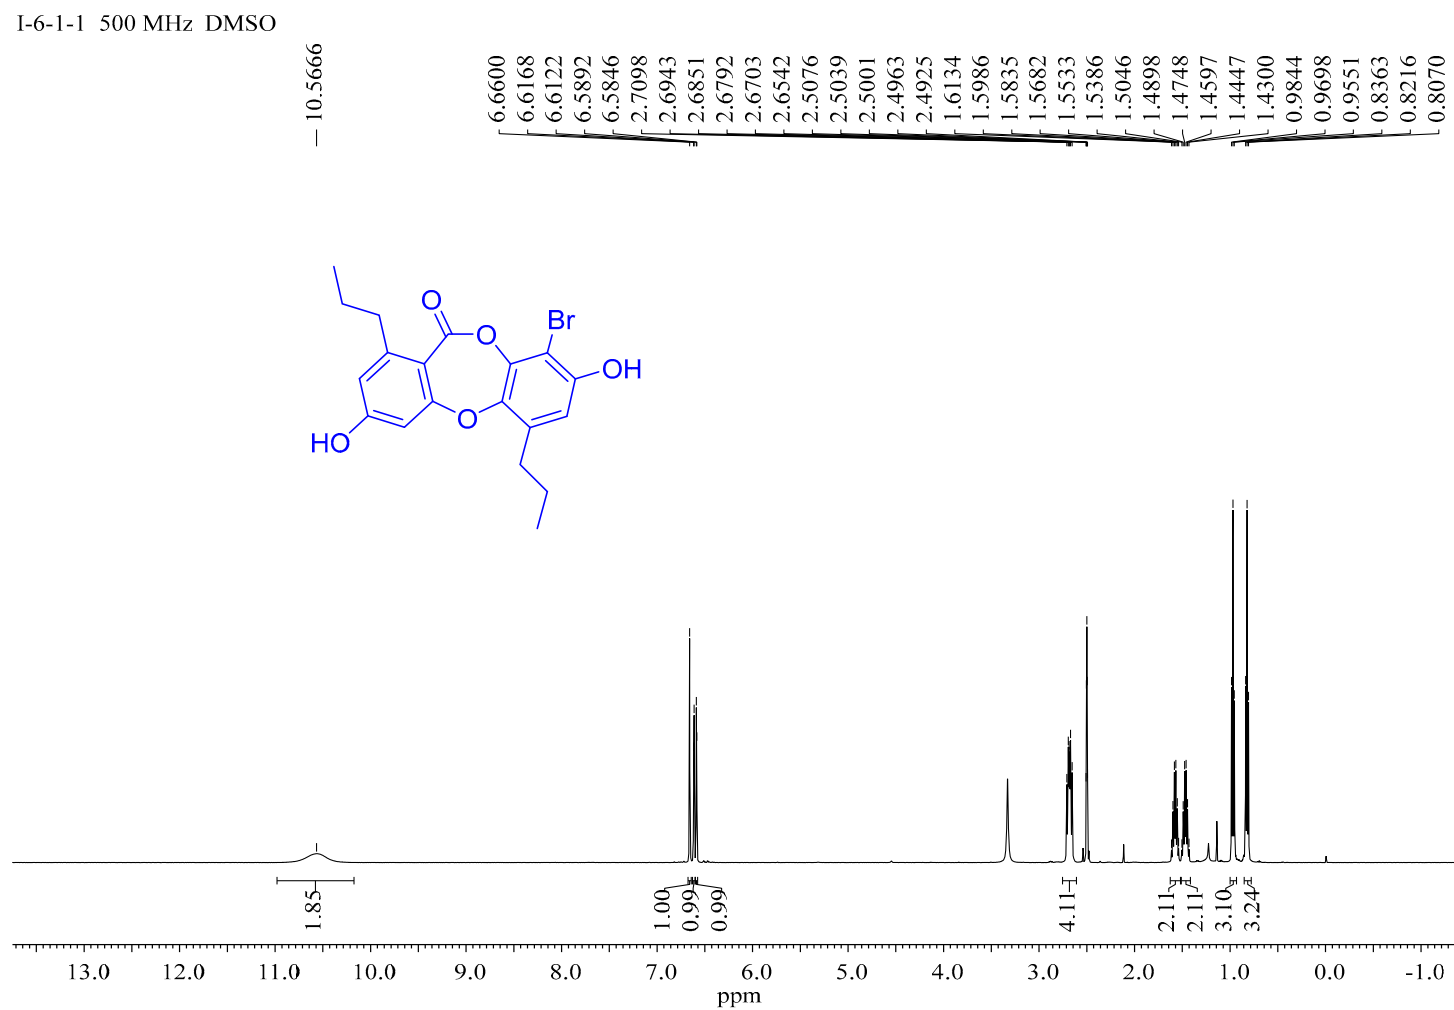

**Figure S97.** <sup>1</sup>H-NMR spectrum of **13** in DMSO-*d*<sub>6</sub> (500 MHz)

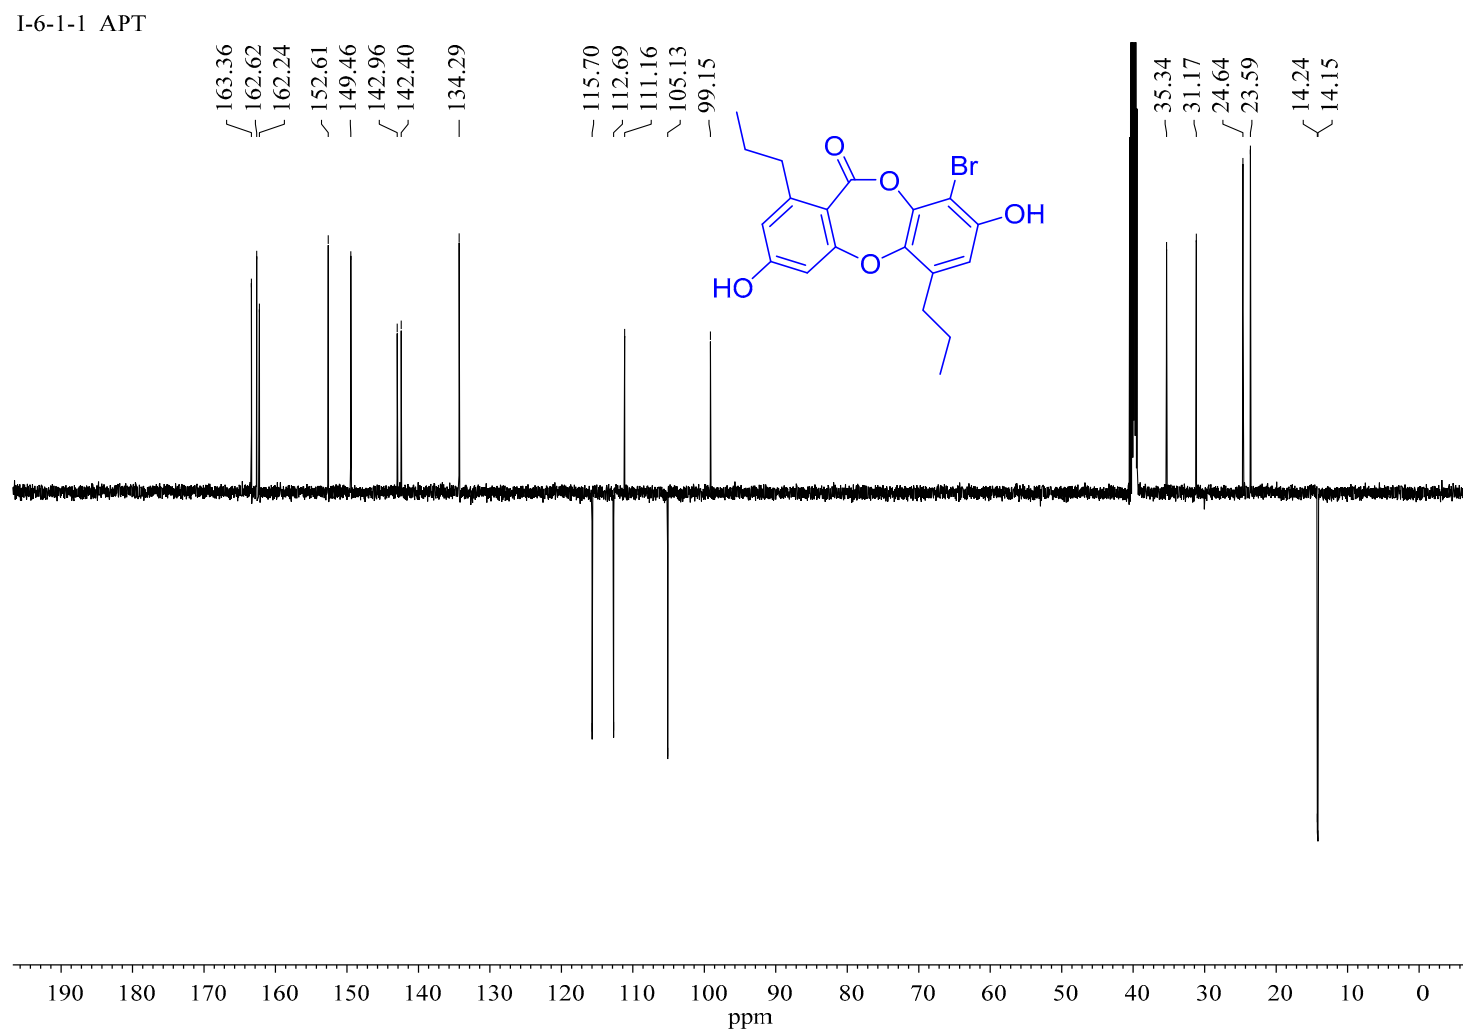

**Figure S98.** APT spectrum of **13** in DMSO-*d*<sub>6</sub> (125 MHz)

I-6-1-1 HSQC

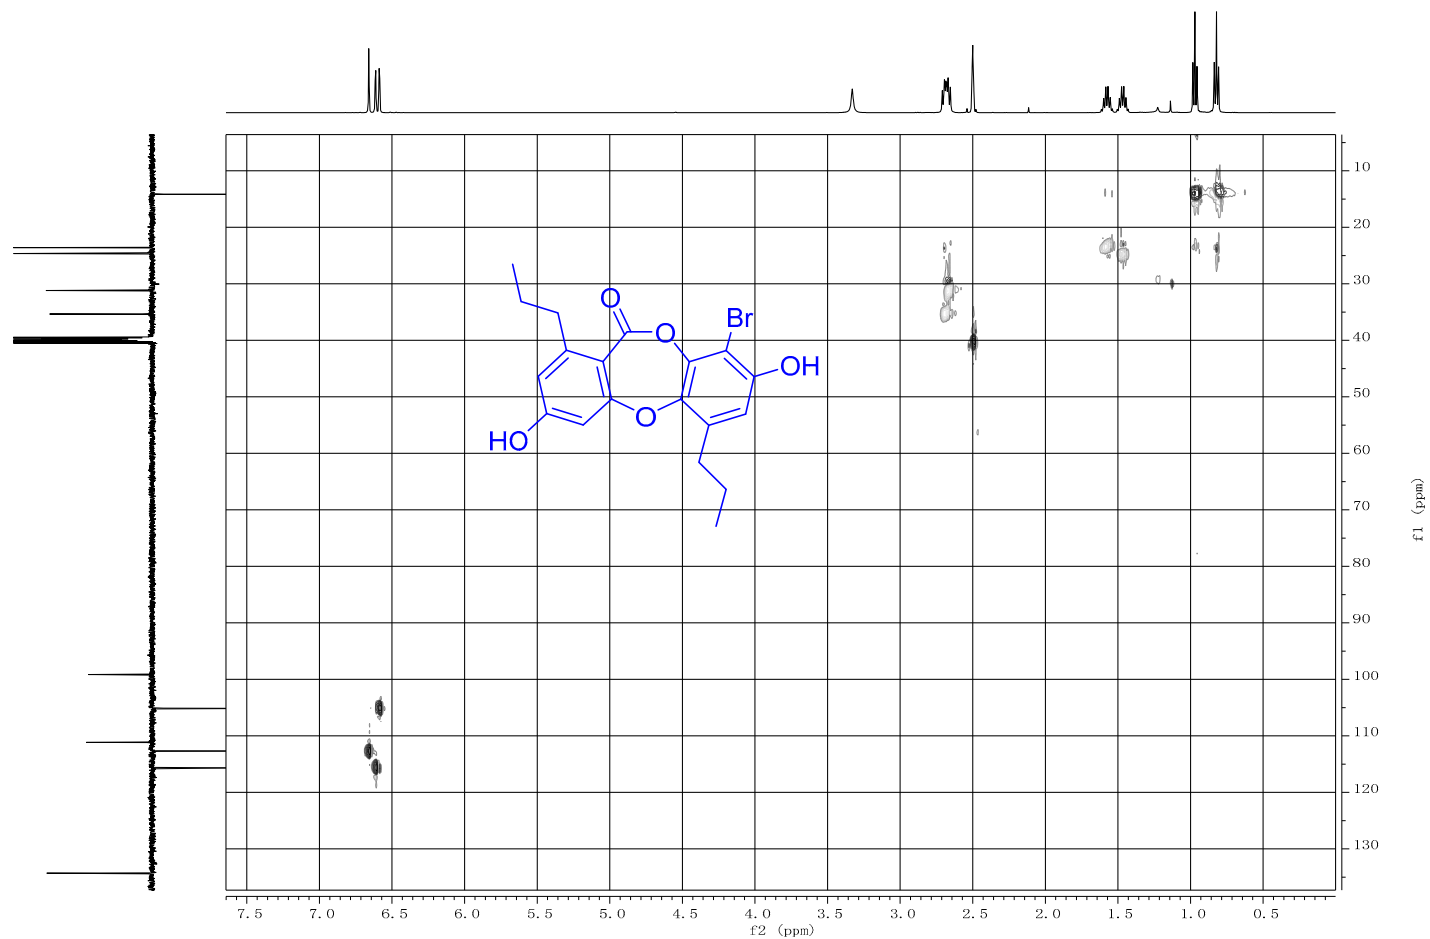

**Figure S99.** HSQC spectrum of **13** in DMSO-*d*<sub>6</sub>

Chemical structure of compound 10 is shown in the center of the plot:

CCOC(=O)c1cc(O)cc(CCC)c1Oc2cc(O)ccc2CCC

**Figure S100.**  $^1\text{H}$ - $^1\text{H}$  COSY spectrum of **13** in DMSO- $d_6$



I-6-1-1 HMBC

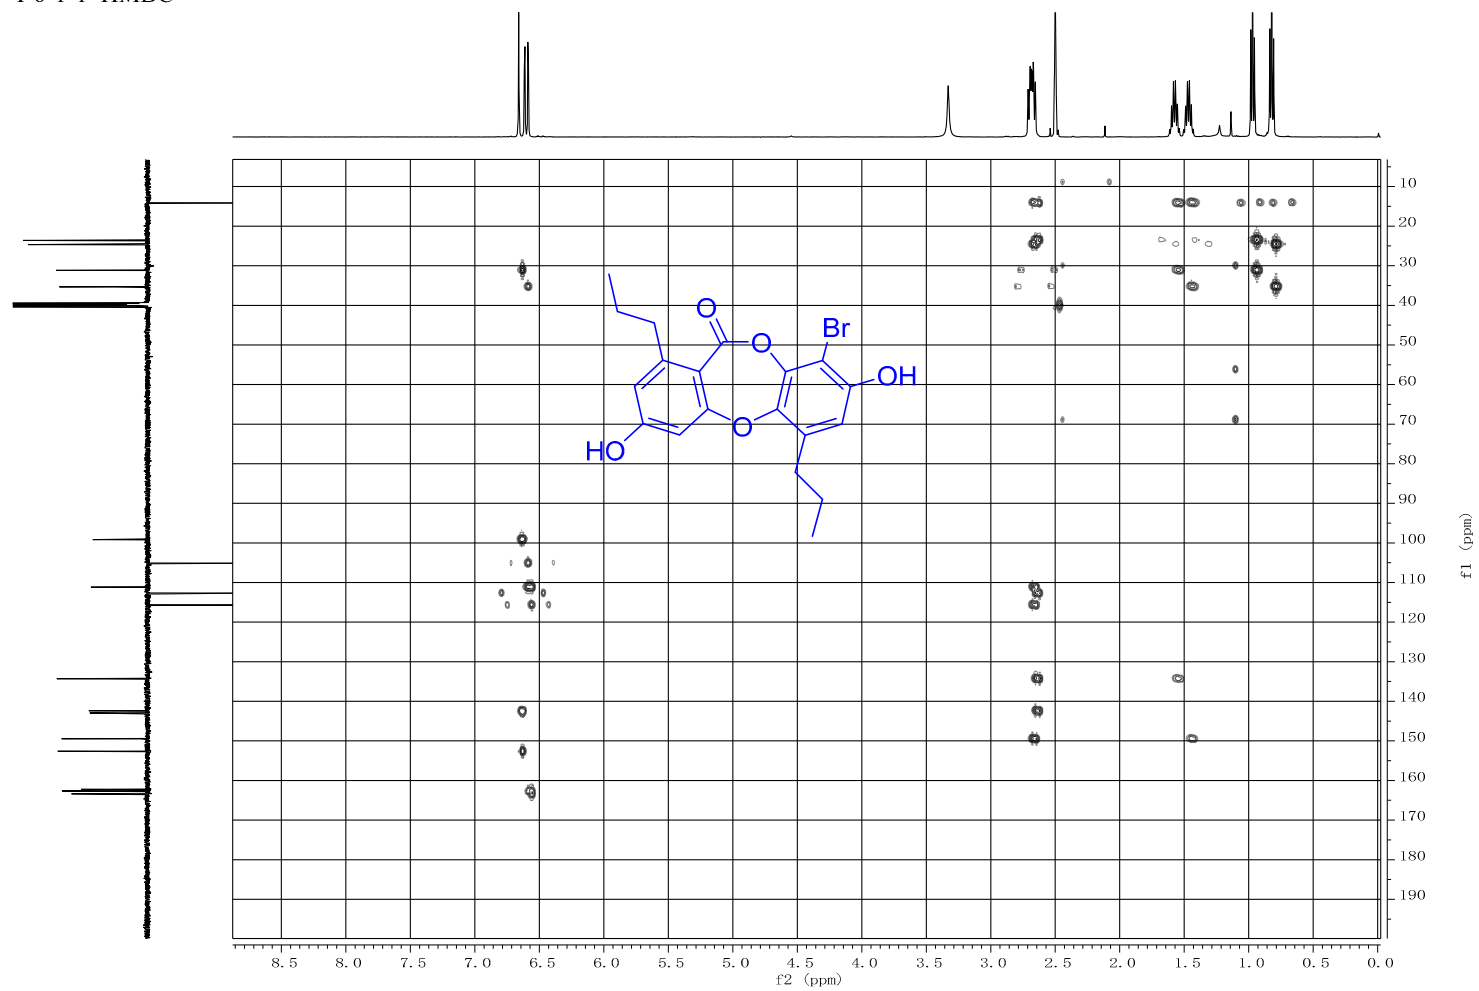

**Figure S101.** HMBC spectrum of **13** in DMSO-*d*<sub>6</sub>

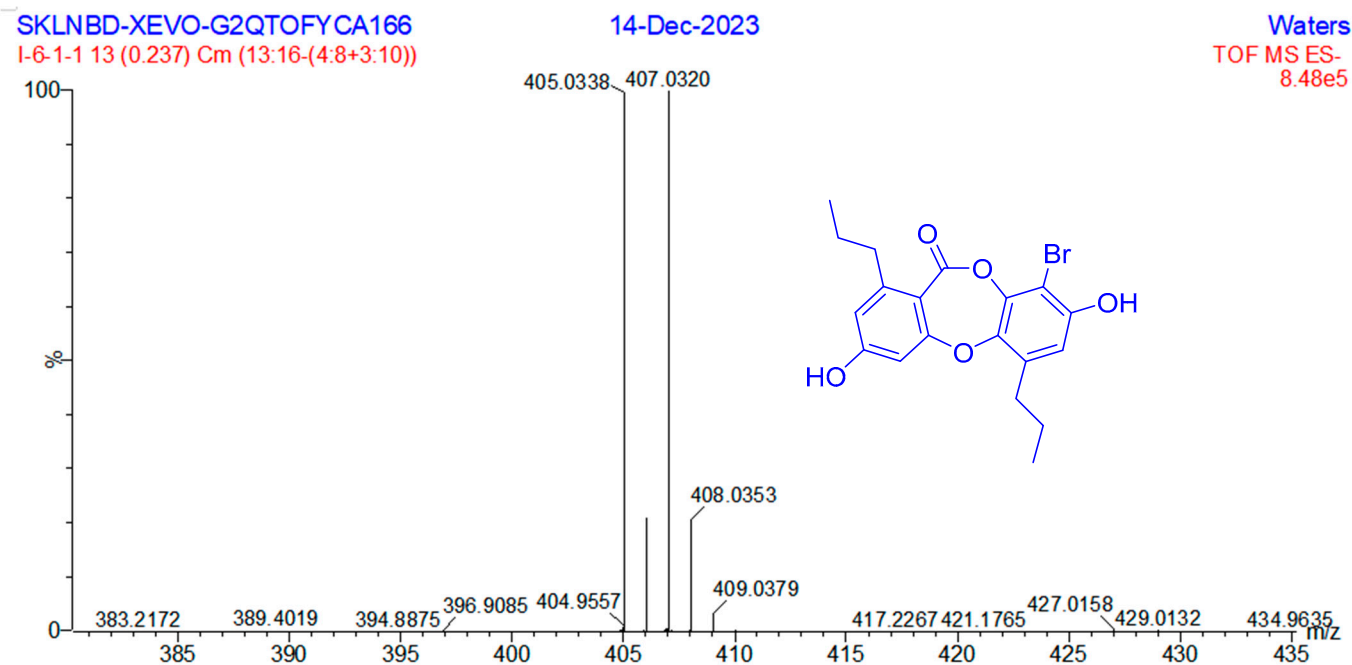

| Mass     | Calc. Mass | mDa  | PPM  | DBE  | i-FIT | Norm   | Conf(%) | Formula                                           |
|----------|------------|------|------|------|-------|--------|---------|---------------------------------------------------|
| 405.0338 | 405.0338   | 0.0  | 0.0  | 10.5 | 476.0 | 0.000  | 100.00  | C <sub>19</sub> H <sub>18</sub> O <sub>5</sub> Br |
|          | 405.0340   | -0.2 | -0.5 | 30.5 | 509.1 | 33.139 | 0.00    | C <sub>32</sub> H <sub>5</sub> O                  |

**Figure S102.** HRESIMS spectrum of **13**

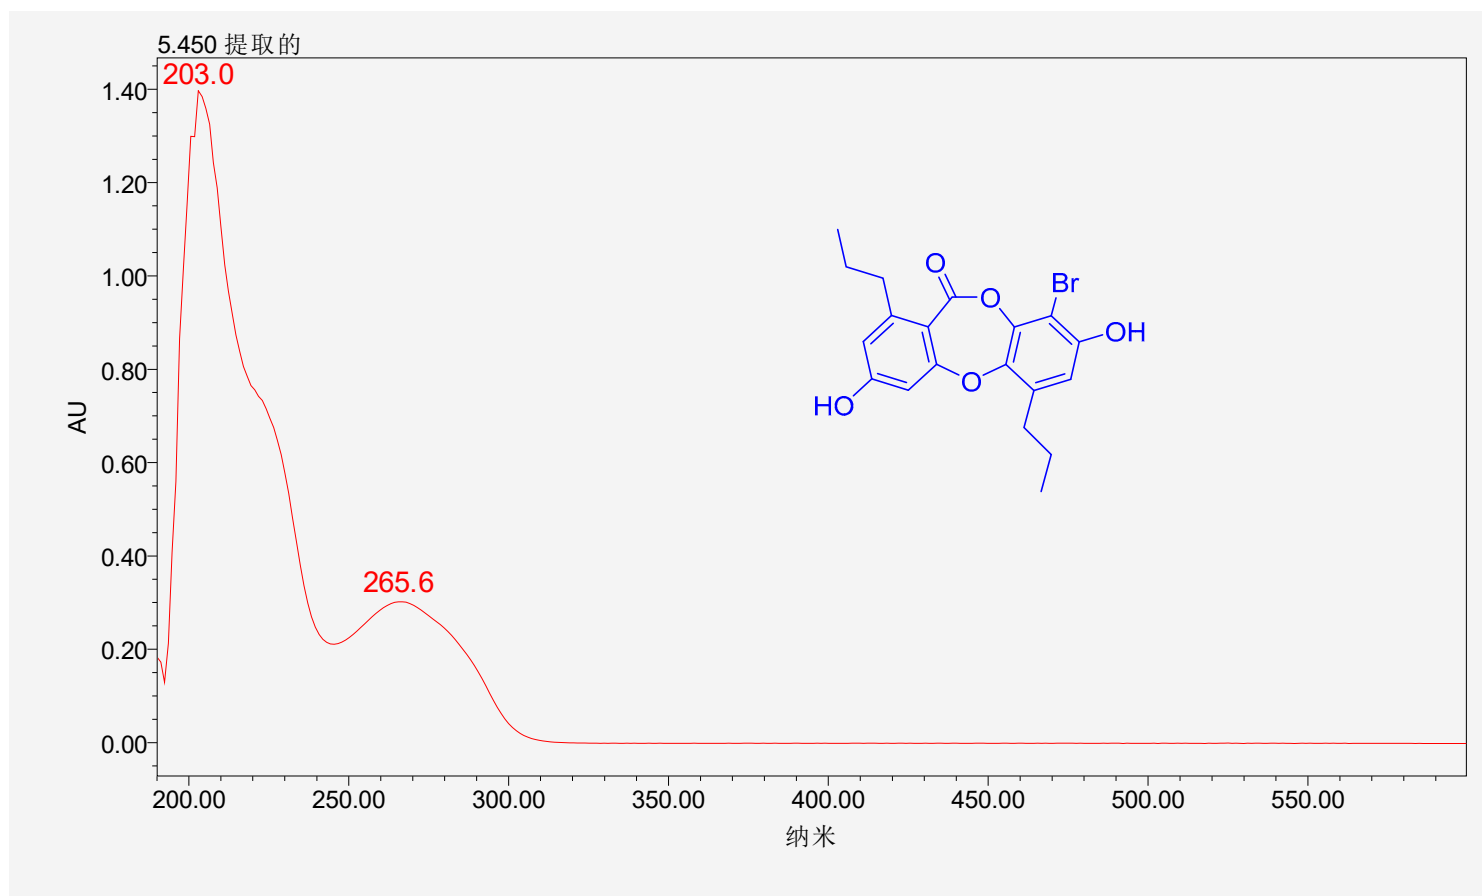

**Figure S103.** UV spectrum of **13**

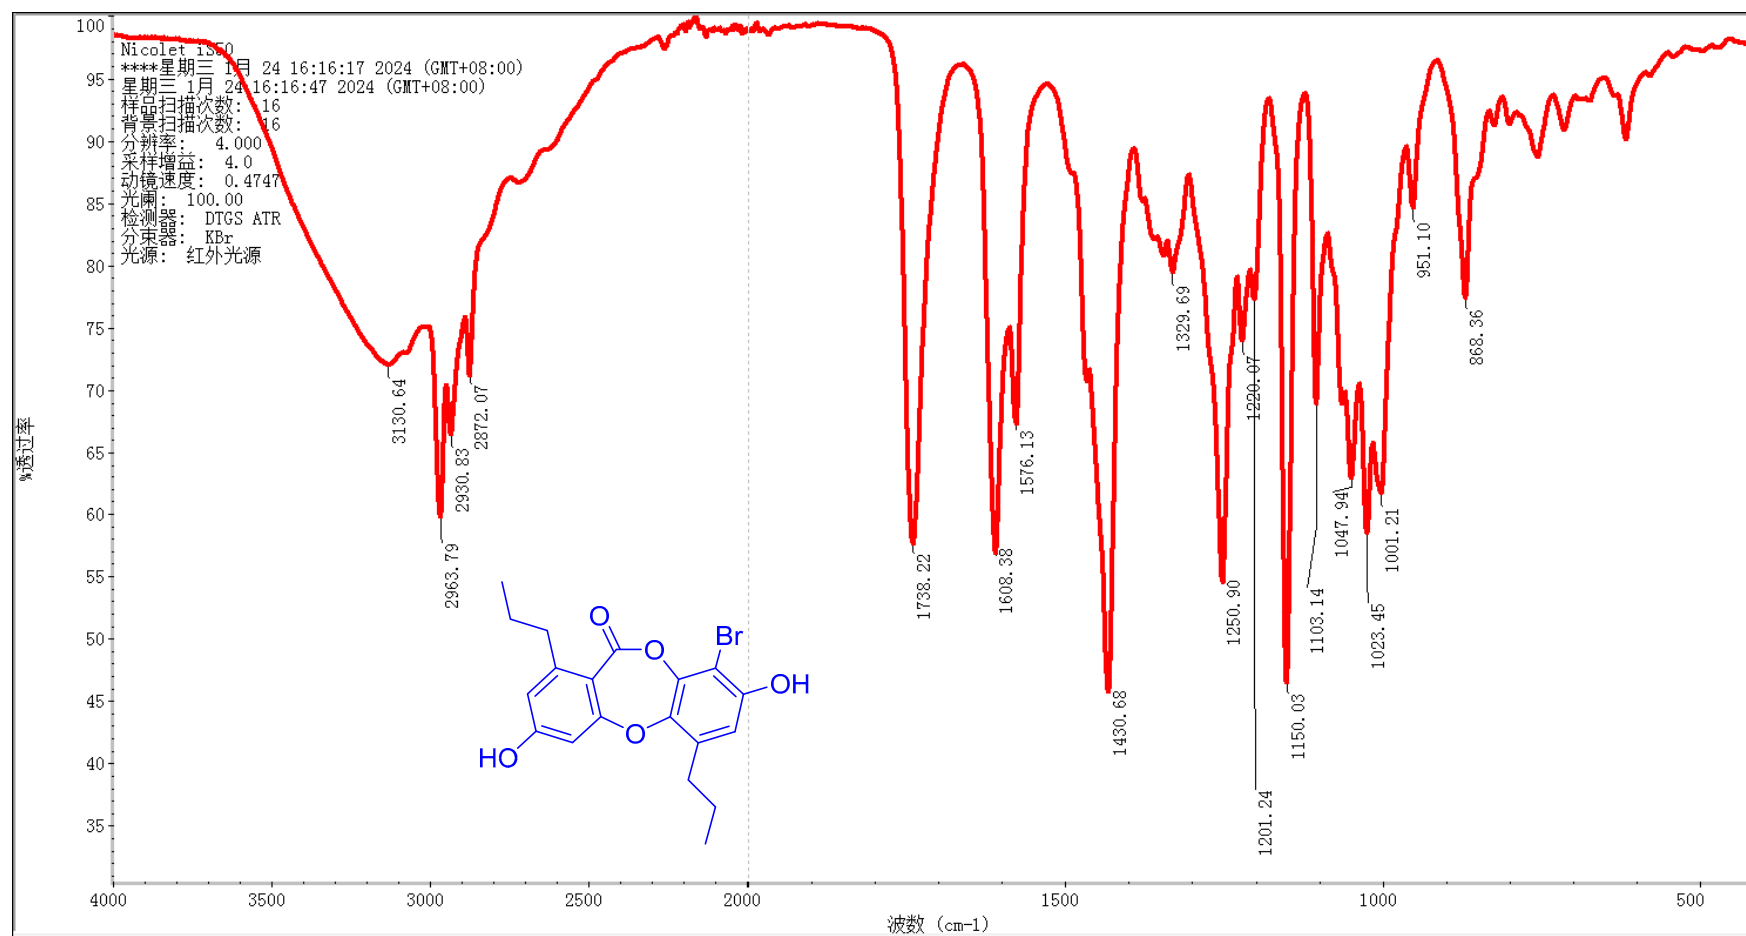

**Figure S104.** IR spectrum of **13**

N-3-2 500 MHz DMSO

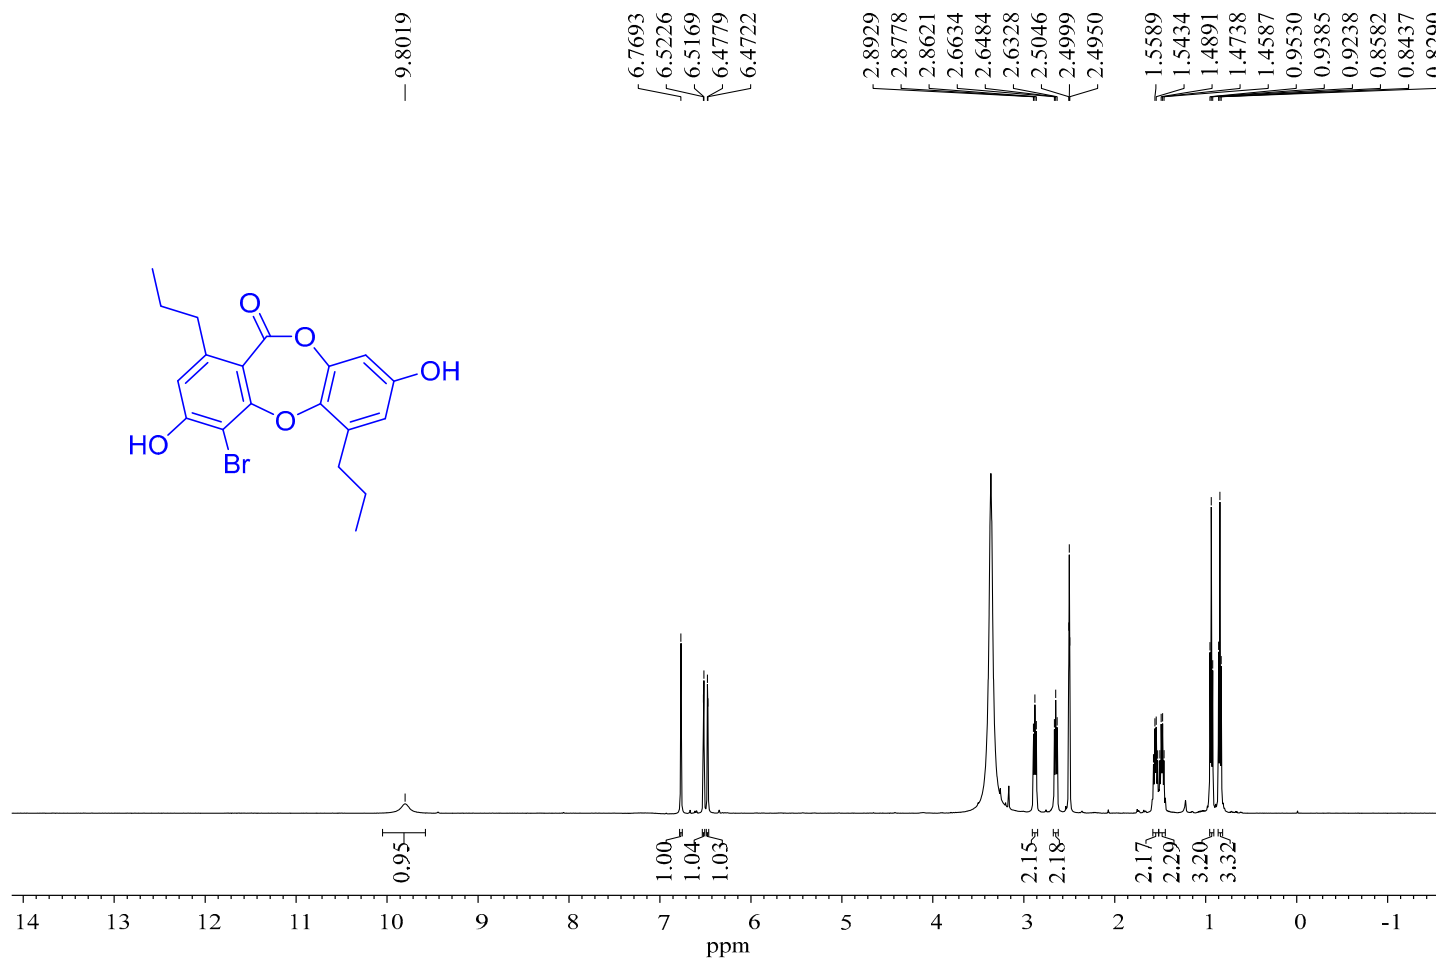

**Figure S105.**  $^1\text{H}$ -NMR spectrum of **14** in DMSO- $d_6$  (500 MHz)

N-3-2 APT

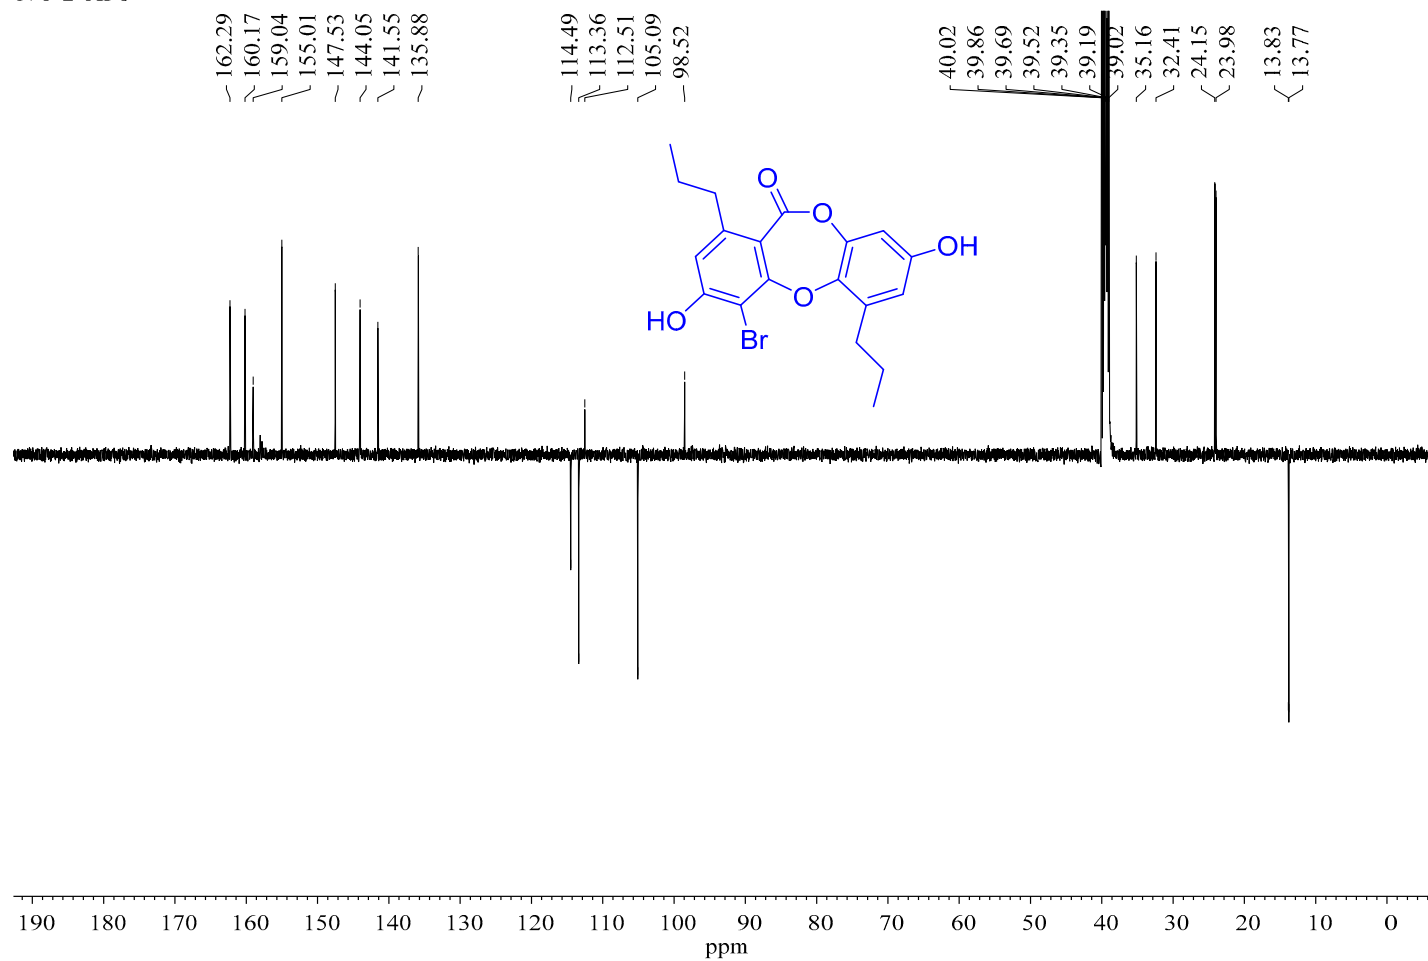

**Figure S106.** APT spectrum of **14** in DMSO-*d*<sub>6</sub> (125 MHz)

N-3-2 HSQC

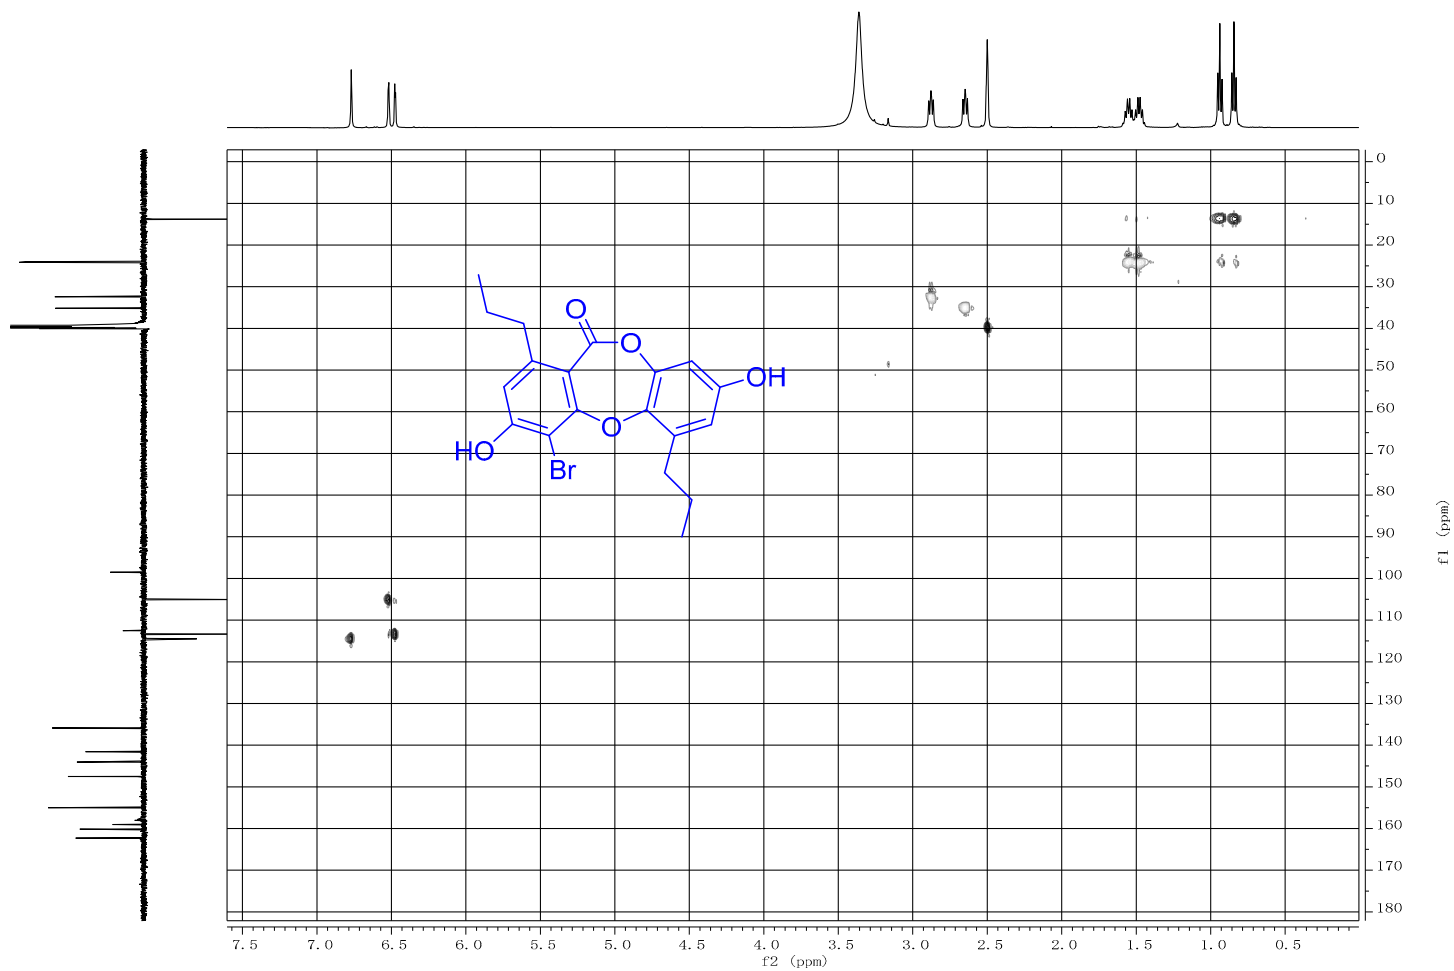

**Figure S107.** HSQC spectrum of **14** in DMSO-*d*<sub>6</sub>

N-3-2 COSY

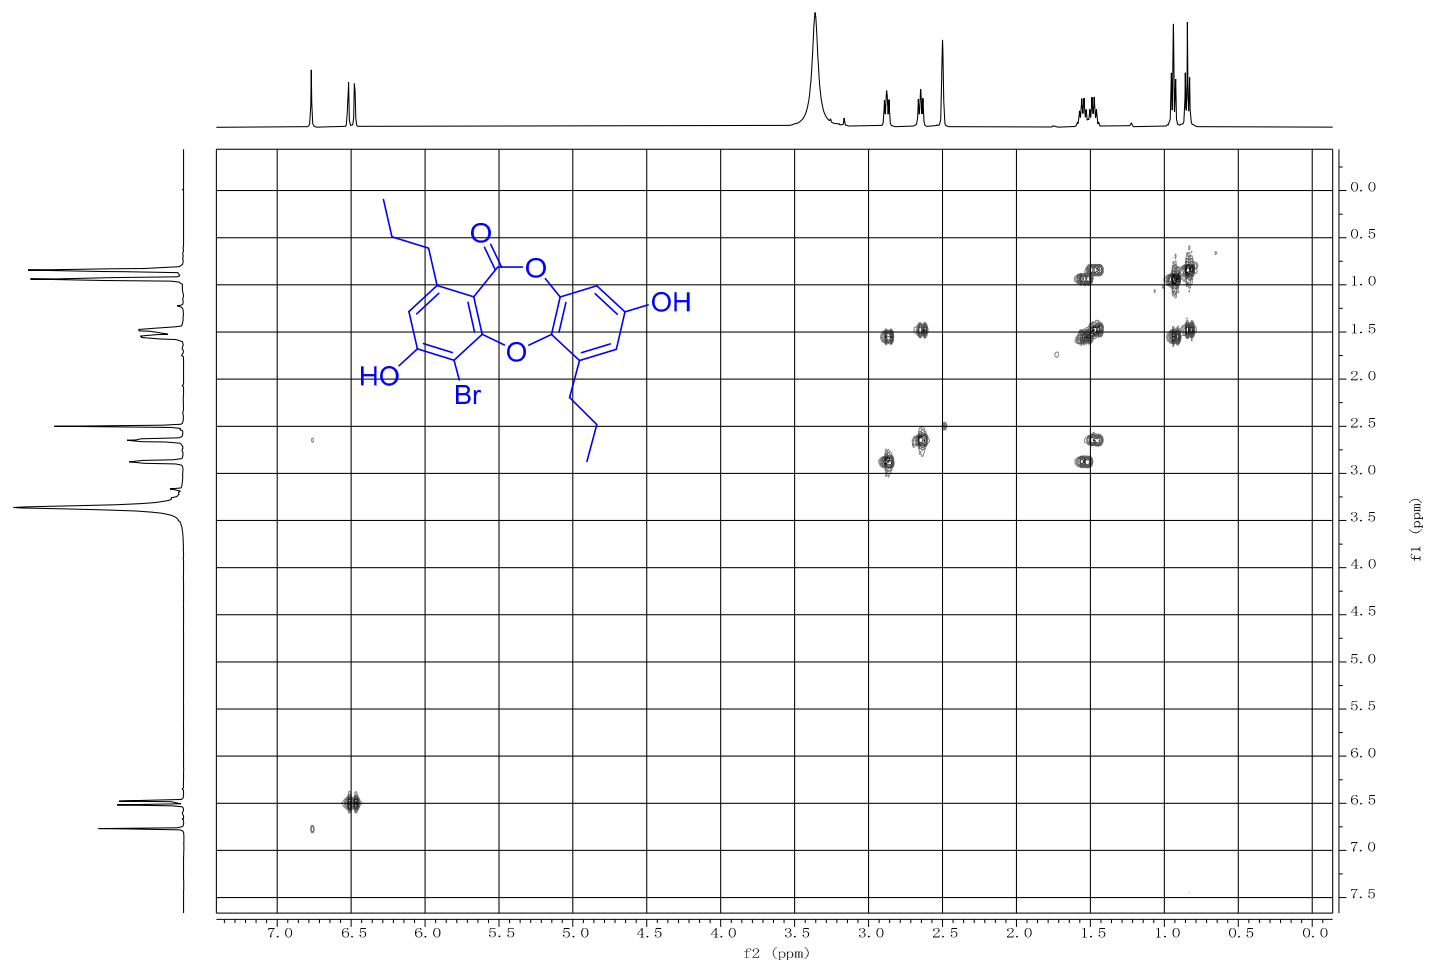

**Figure S108.**  $^1\text{H}$ - $^1\text{H}$  COSY spectrum of **14** in  $\text{DMSO}-d_6$



N-3-2 HMBC

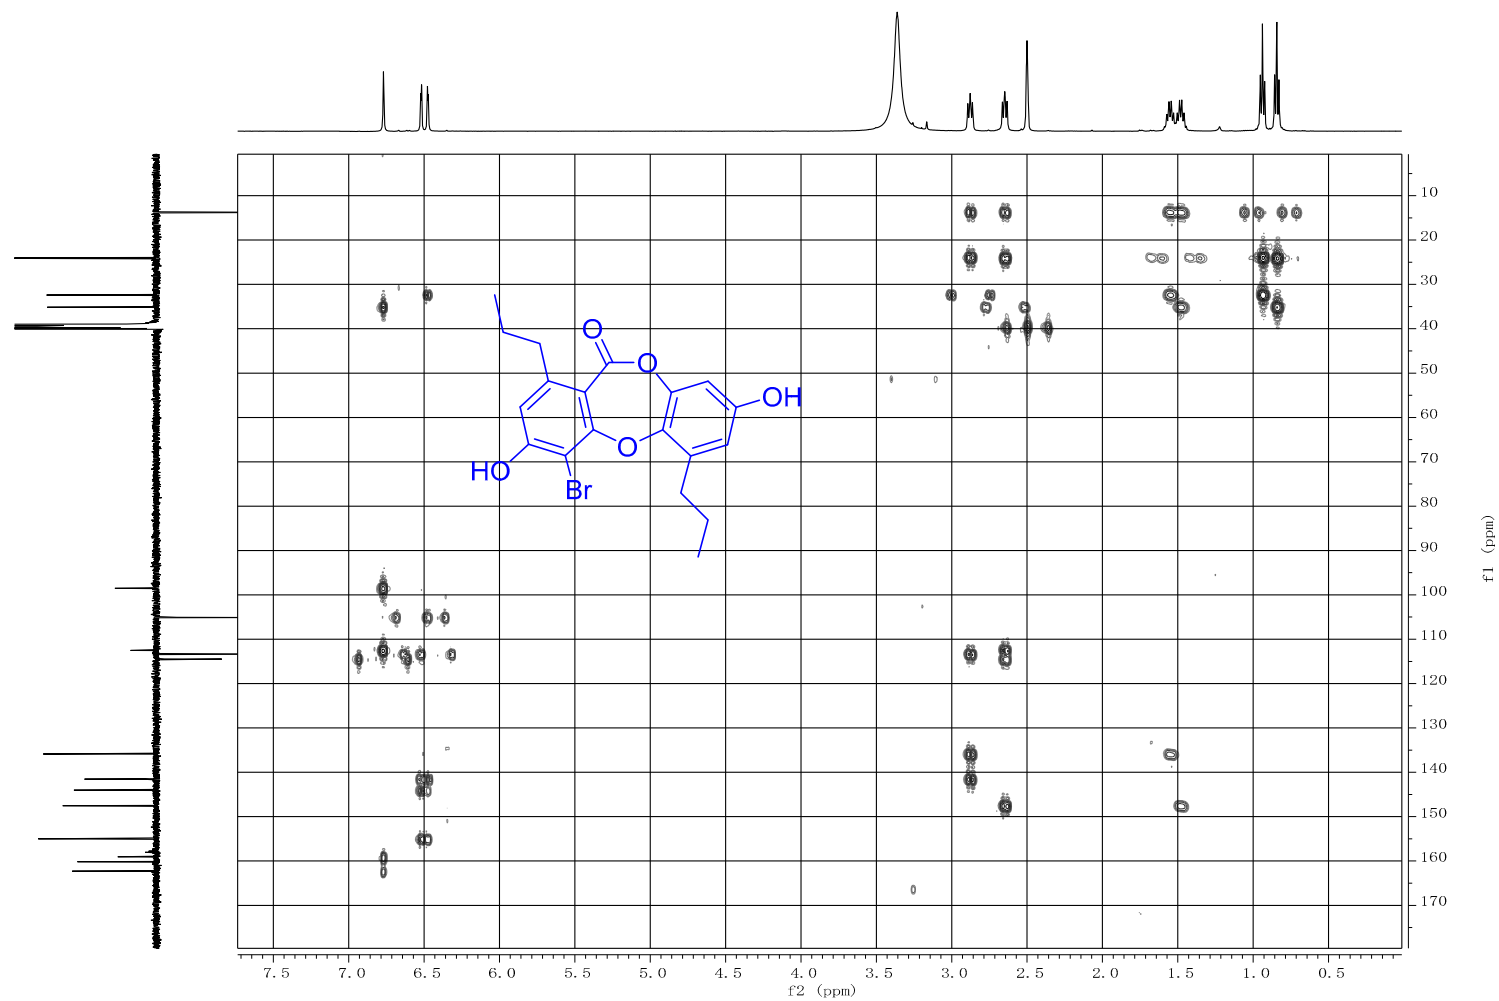

**Figure S109.** HMBC spectrum of **14** in DMSO-*d*<sub>6</sub>

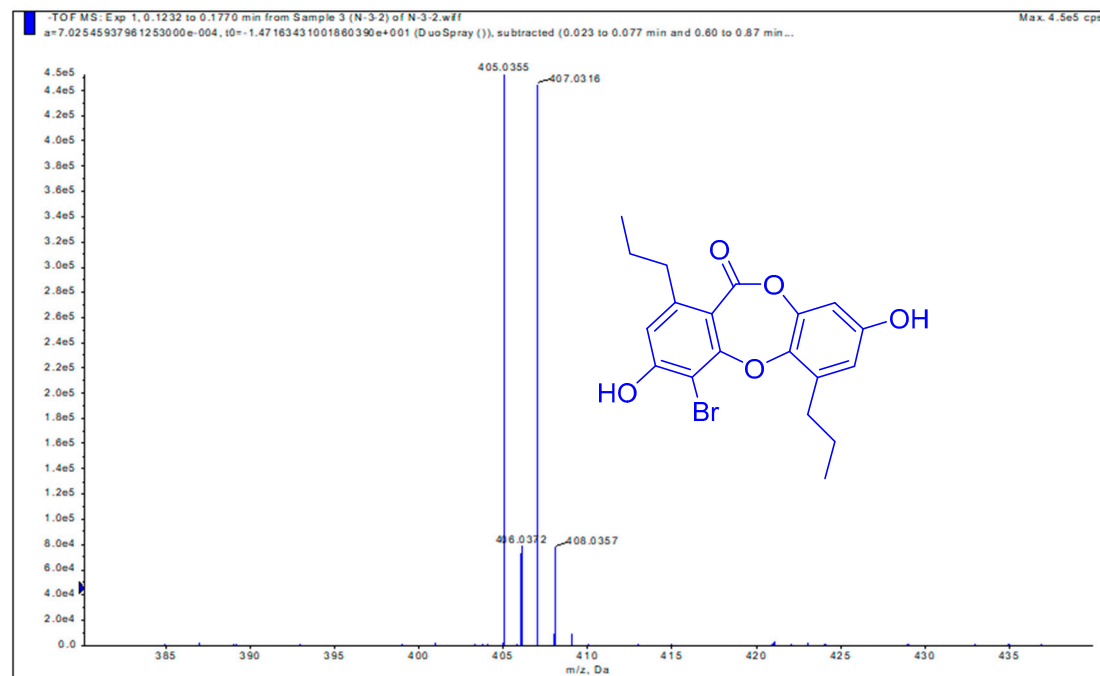

Elemental Composition   Hypermass   Elemental Targeting   Mass Property   Isotopic Distribution

Input parameters  
Target m/z: 405.0355 Da  
Tolerance: 5 ppm

Calculate   Show isotopic   Export to file   Help

|   | Formula ...                                       | Calculated | mDa Error | ppm Error | DBE  |
|---|---------------------------------------------------|------------|-----------|-----------|------|
| 1 | C <sub>19</sub> H <sub>18</sub> O <sub>5</sub> Br | 405        | 1.7399    | 4.2958    | 10.5 |

Figure S110. HRESIMS spectrum of **14**

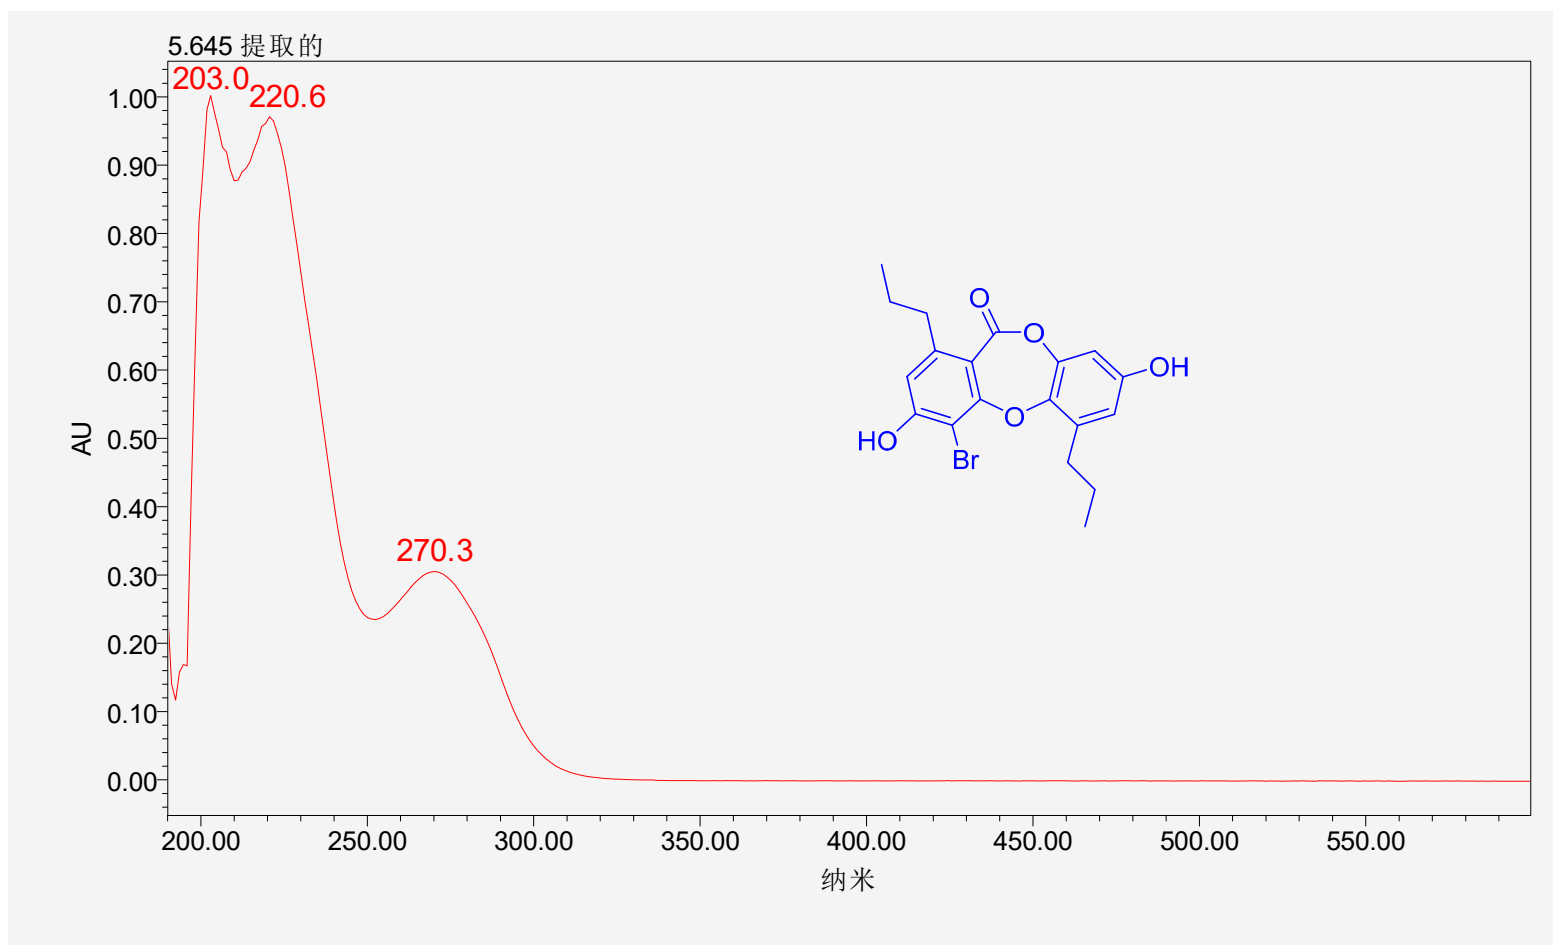

**Figure S111.** UV spectrum of **14**

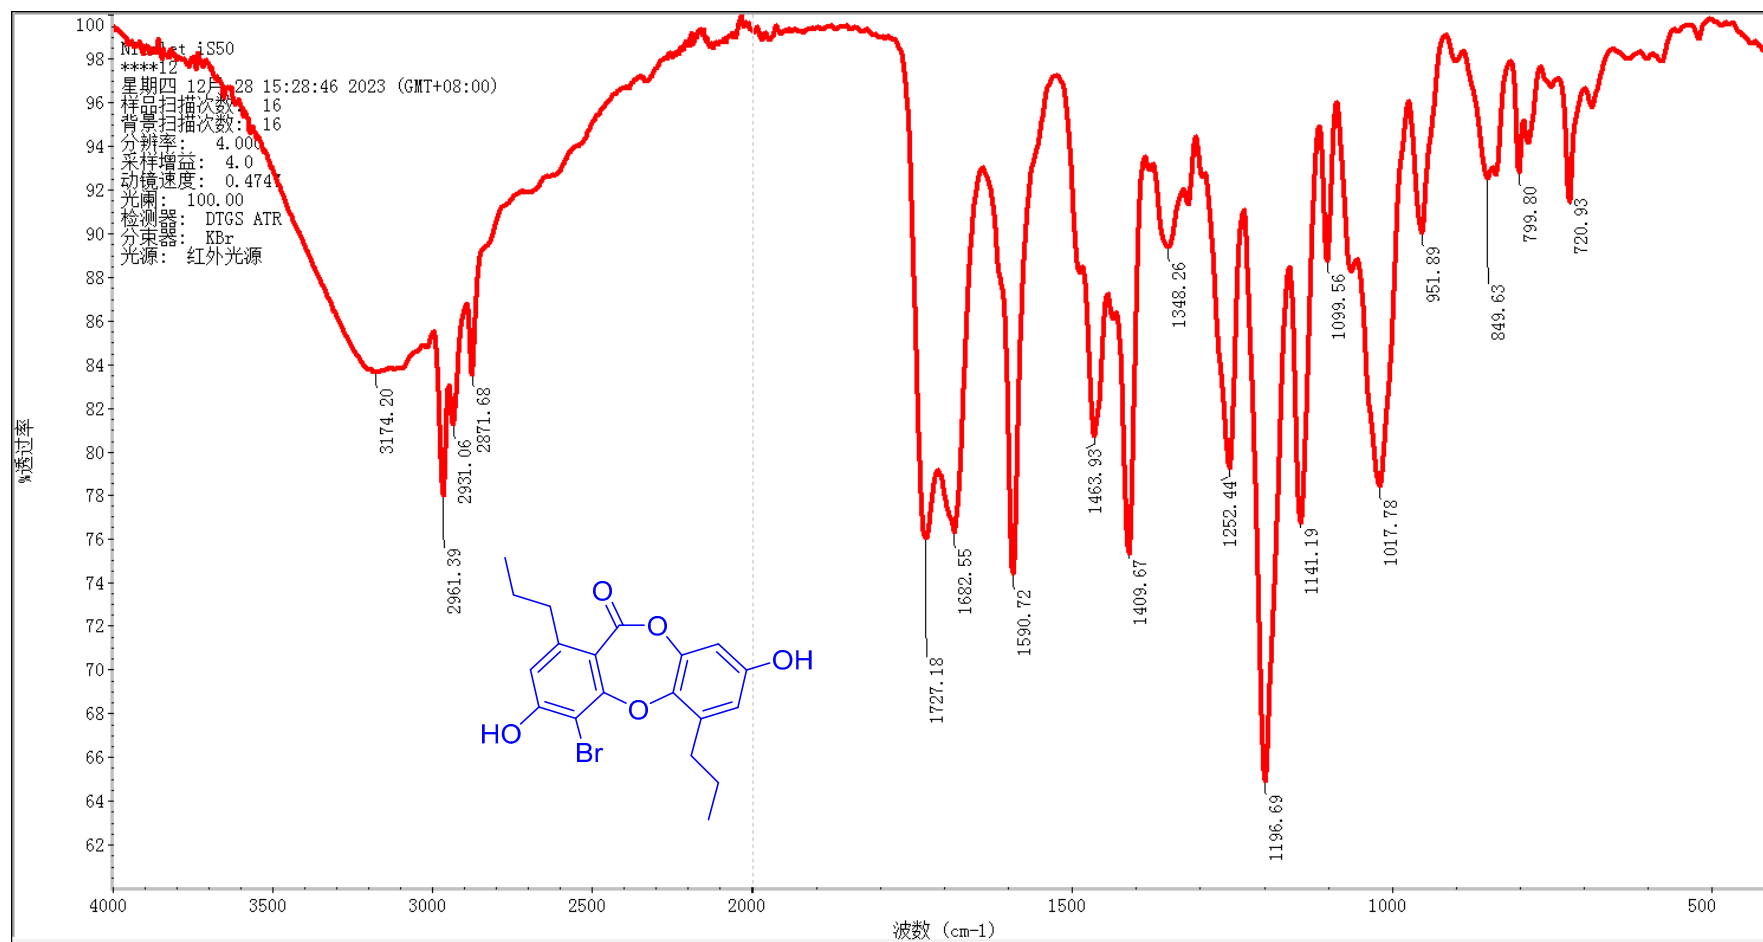

Figure S112. IR spectrum of 14

N-5-4 500 MHz DMSO

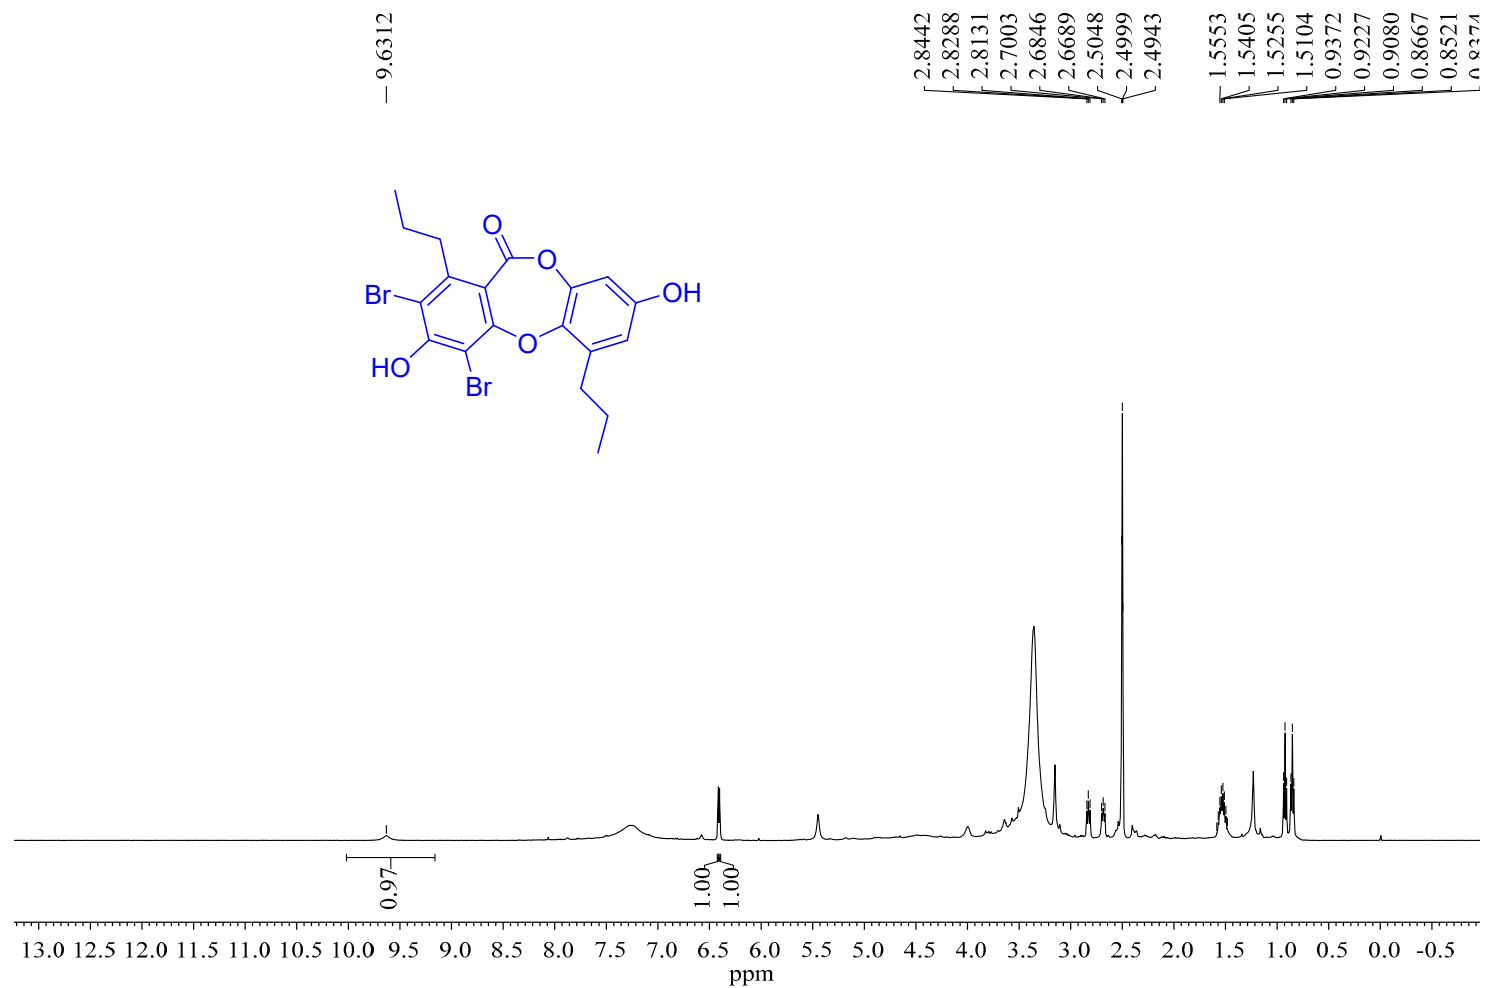

**Figure S113.**  $^1\text{H}$ -NMR spectrum of **15** in DMSO- $d_6$  (500 MHz)

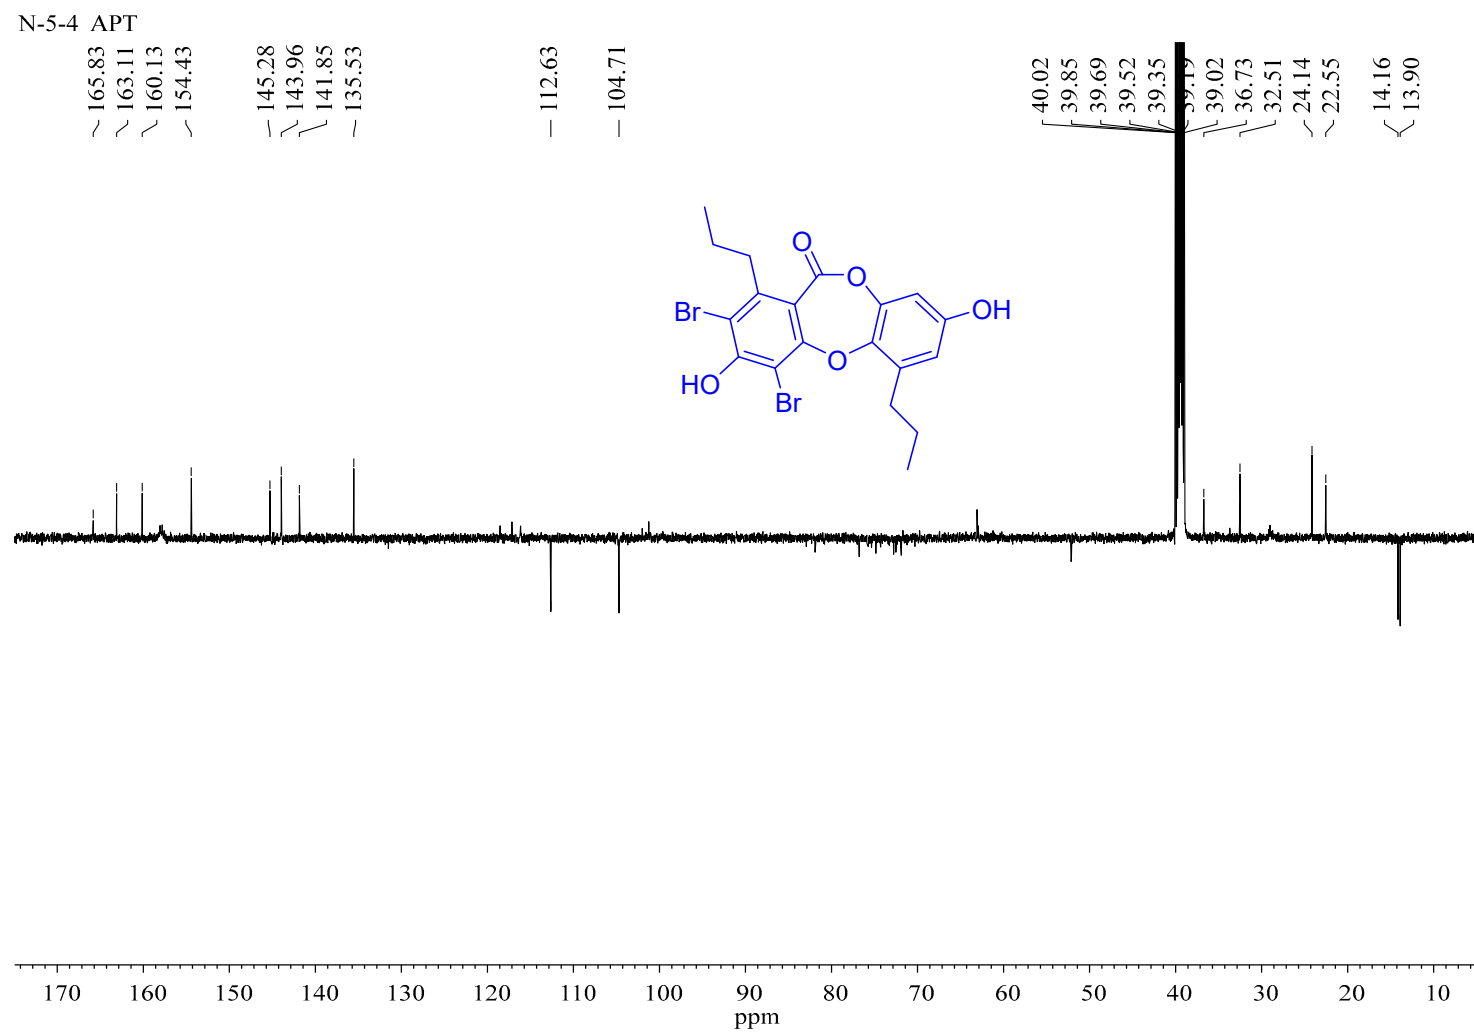

**Figure S114.** APT spectrum of **15** in DMSO-*d*<sub>6</sub> (125 MHz)

N-5-4 HSQC

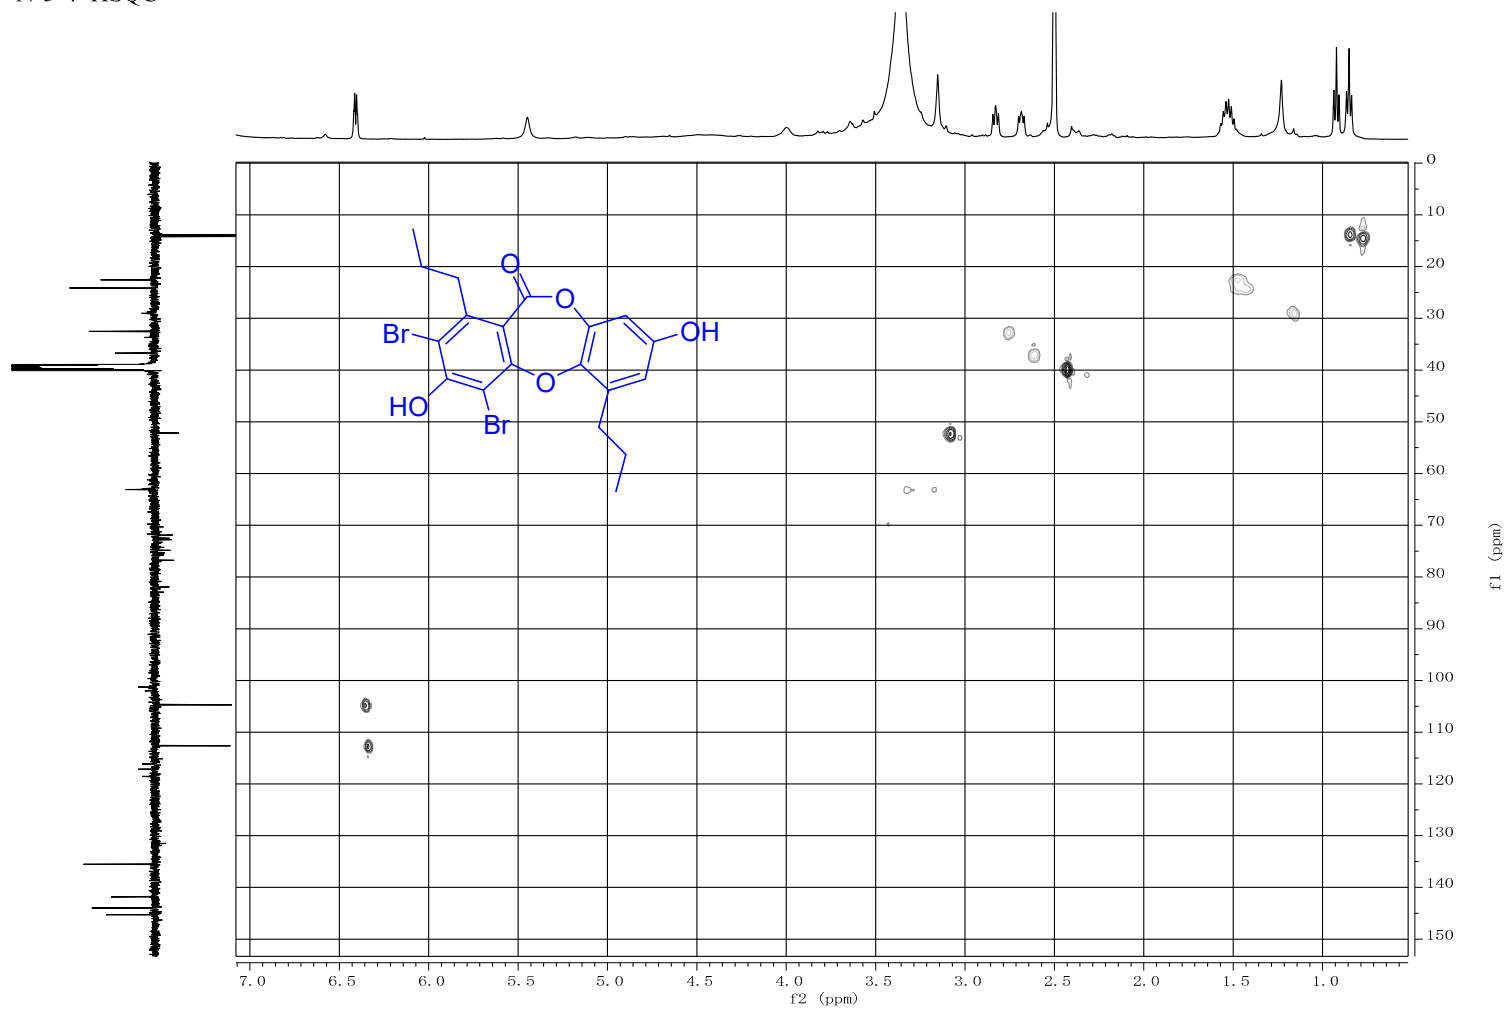

**Figure S115.** HSQC spectrum of **15** in  $\text{DMSO-}d_6$

N-5-4 COSY

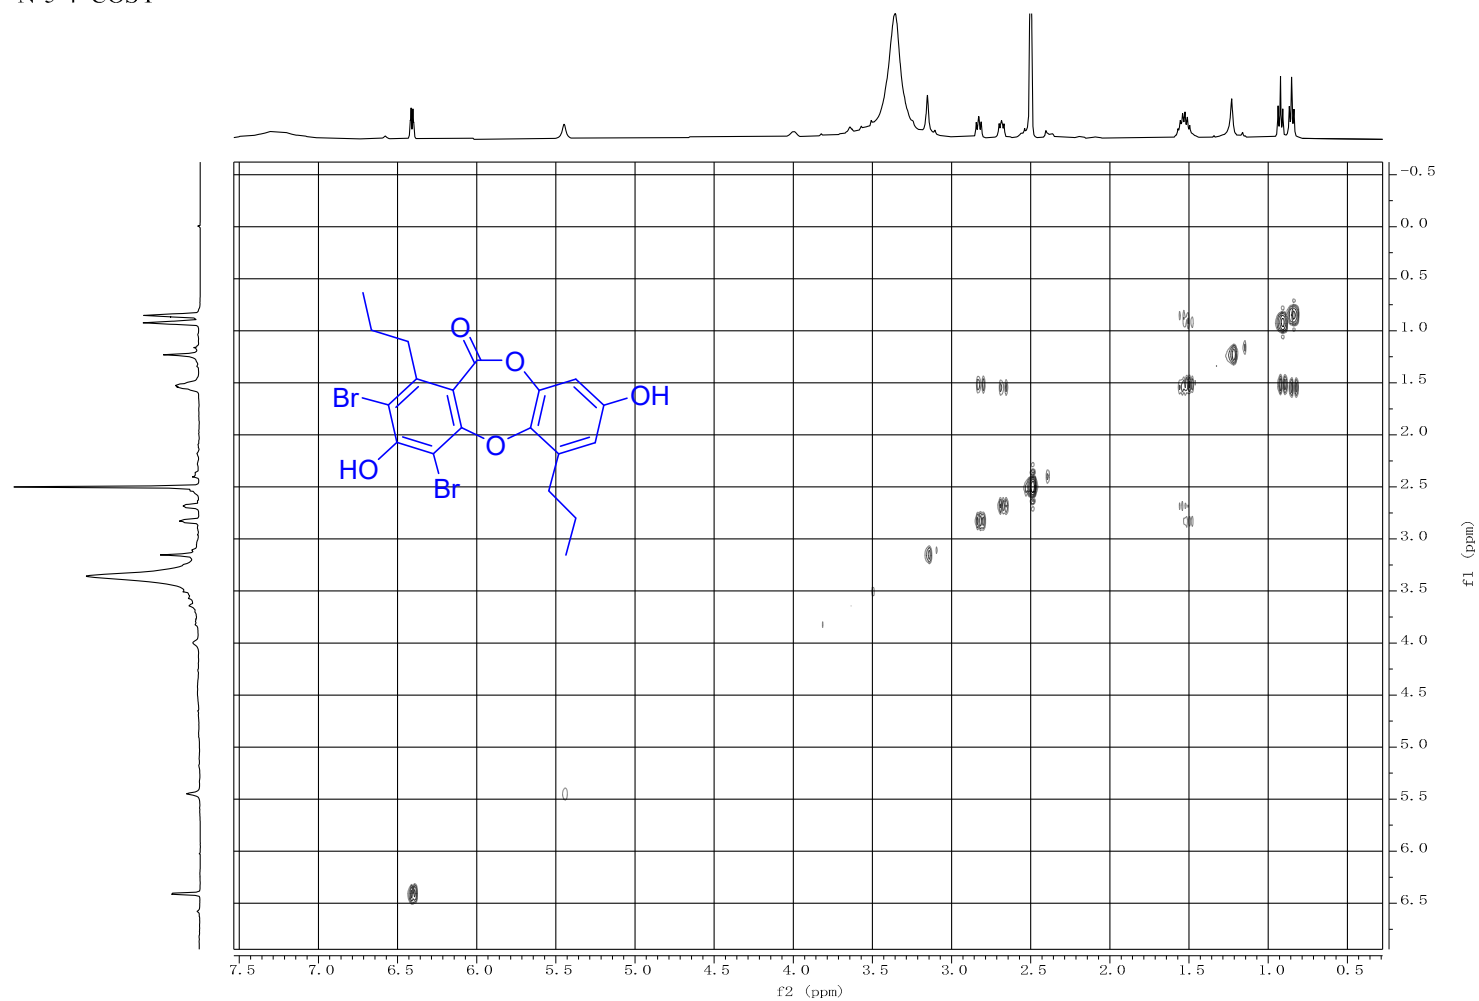

**Figure S116.**  $^1\text{H}$ - $^1\text{H}$  COSY spectrum of **15** in  $\text{DMSO-}d_6$



N-5-4 HMBC

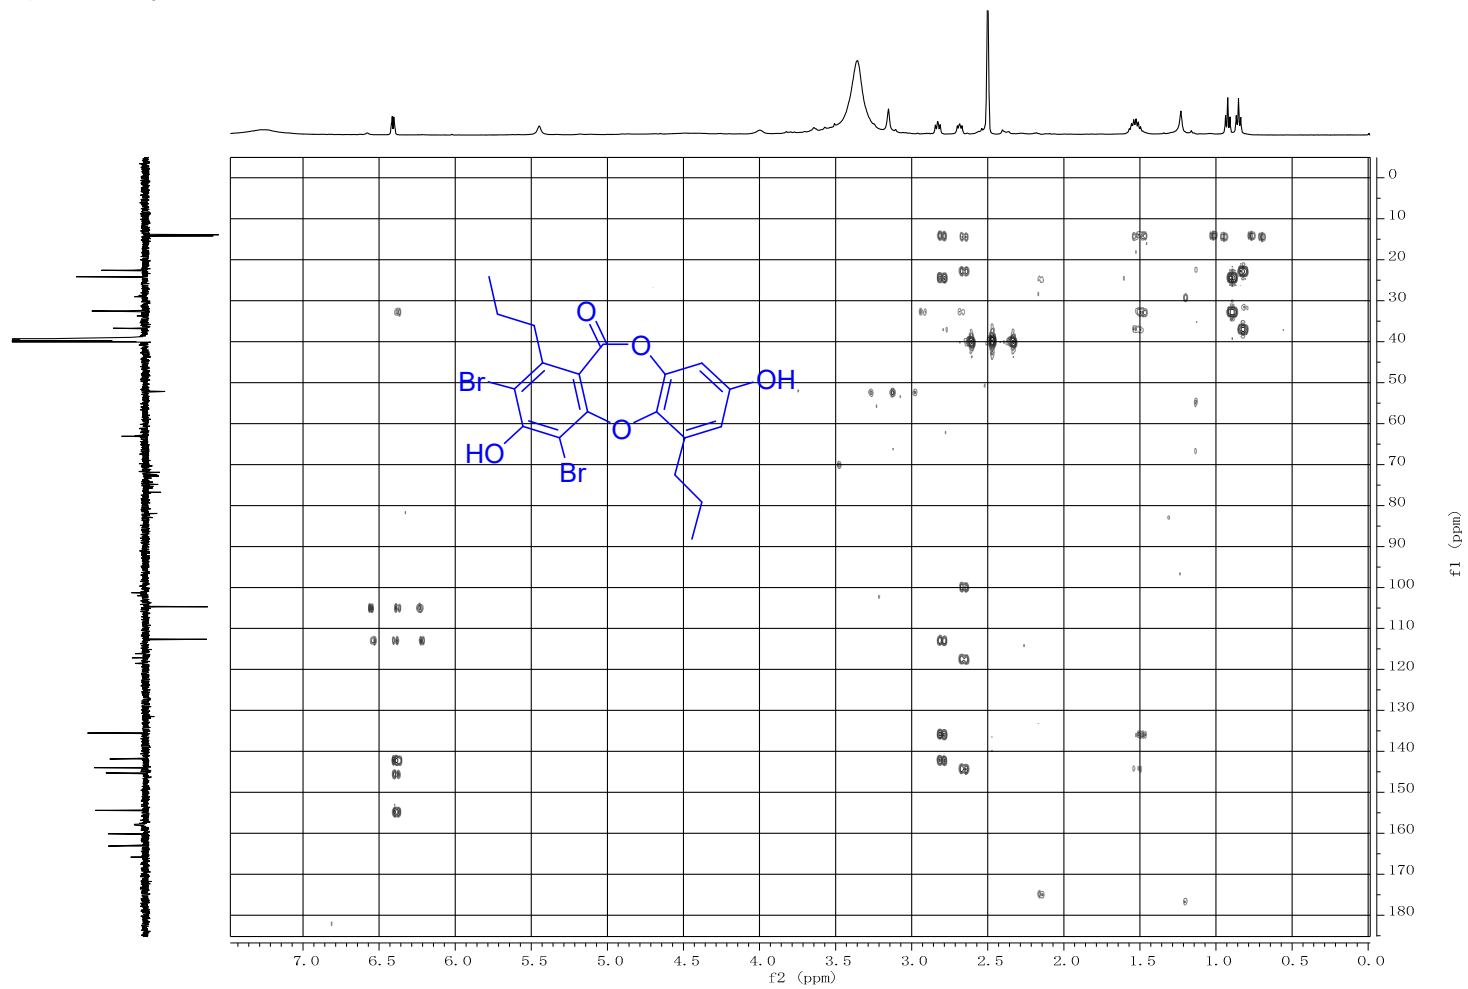

**Figure S117.** HMBC spectrum of **15** in DMSO-*d*<sub>6</sub>

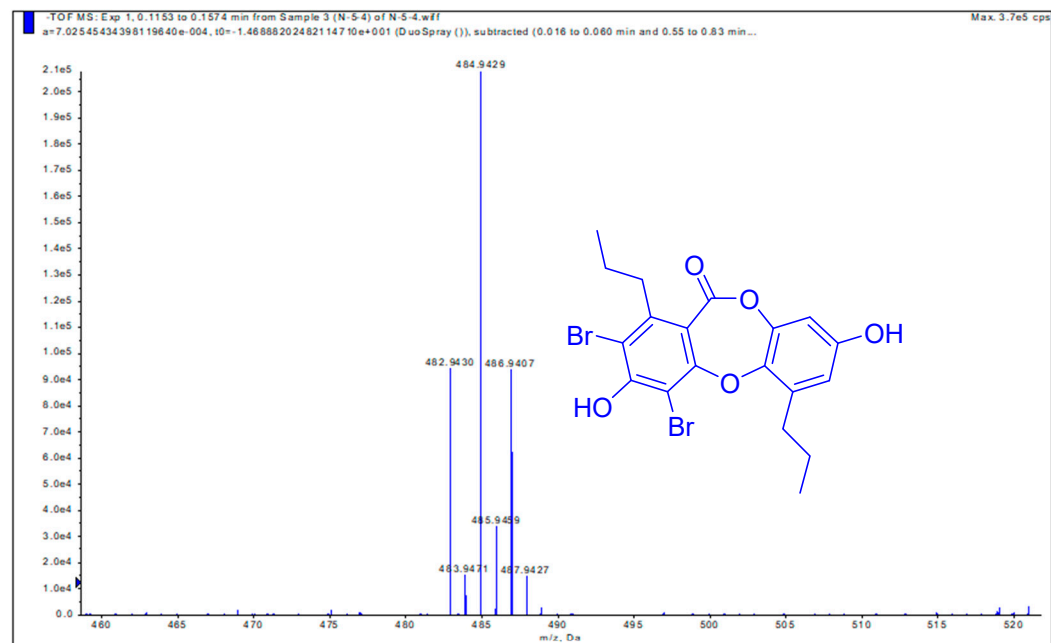

Elemental Composition   Hypermass   Elemental Targeting   Mass Property   Isotopic Distribution

Input parameters

Target m/z: 482.9430 Da

Tolerance: 5 ppm

Calculate   Show isotopic   Export to file   Help

|   | Formula ...    | Calculated | mDa Error | ppm Error | DBE  |
|---|----------------|------------|-----------|-----------|------|
| 1 | C19 H17 O5 Br2 | 482.9      | -1.271    | -2.6319   | 10.5 |

Figure S118. HRESIMS spectrum of **15**

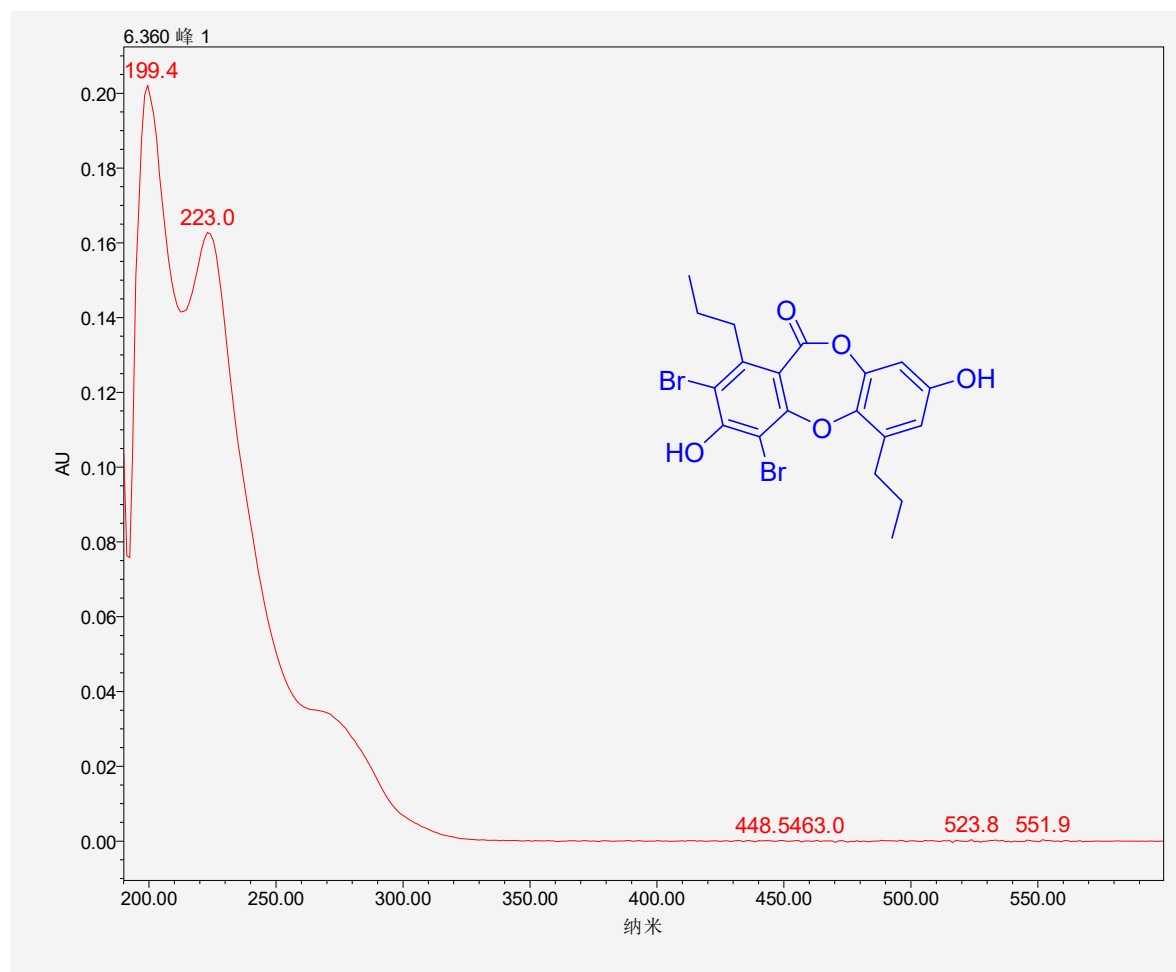

**Figure S119.** UV spectrum of **15**

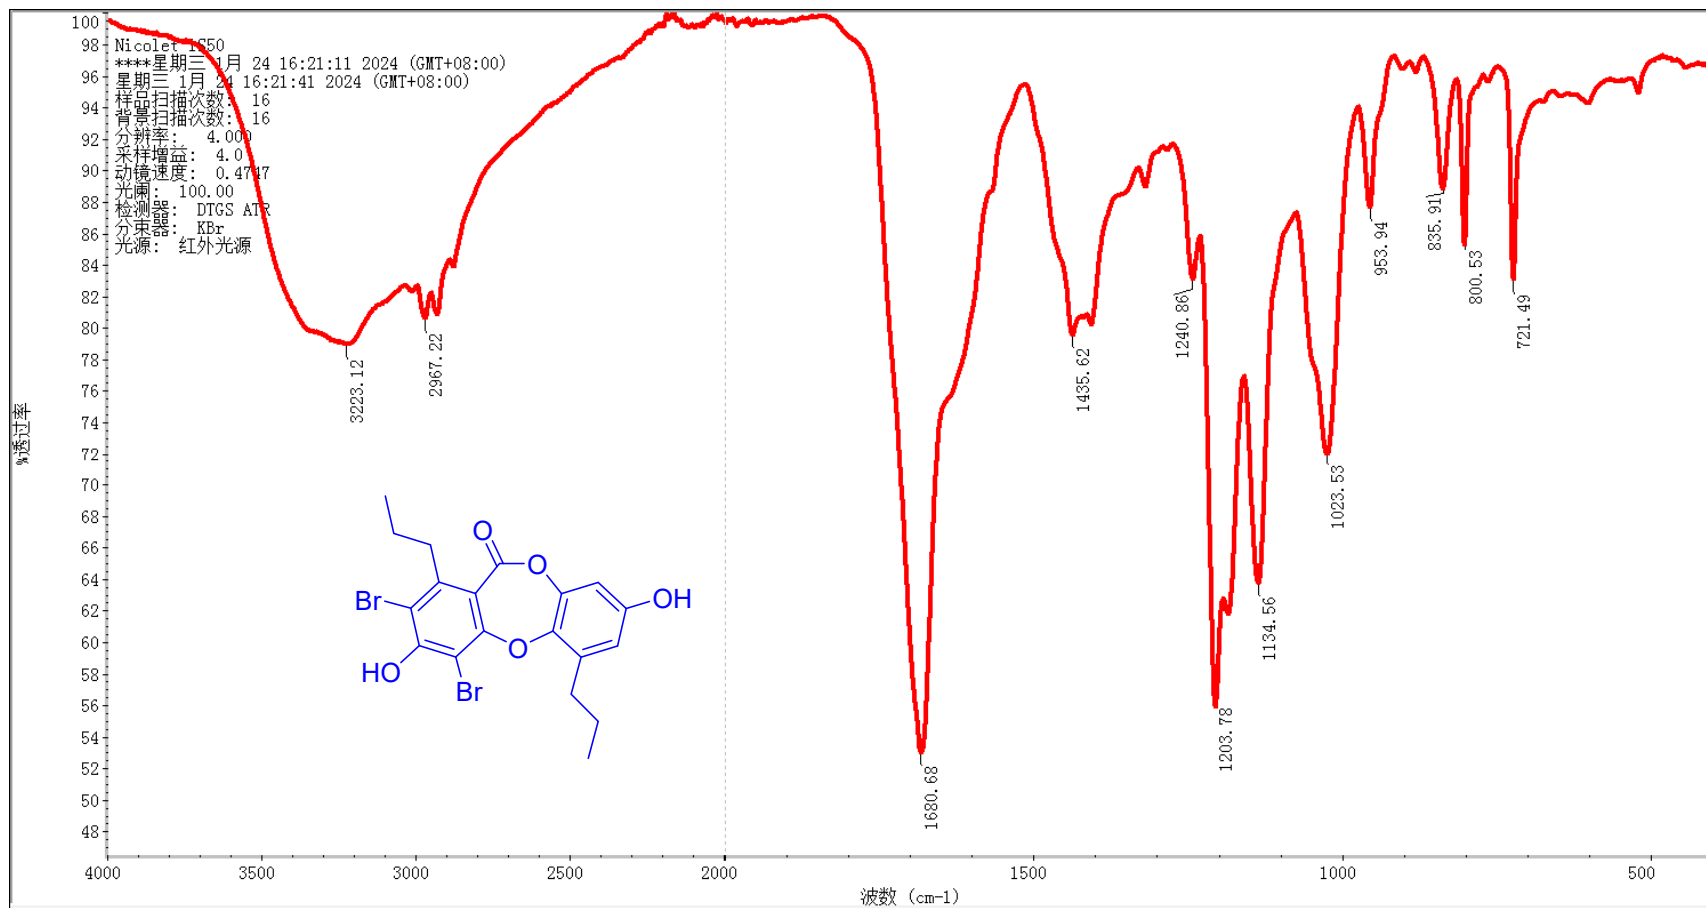

Figure S120. IR spectrum of 15

Fr.M-2 500 MHz DMSO

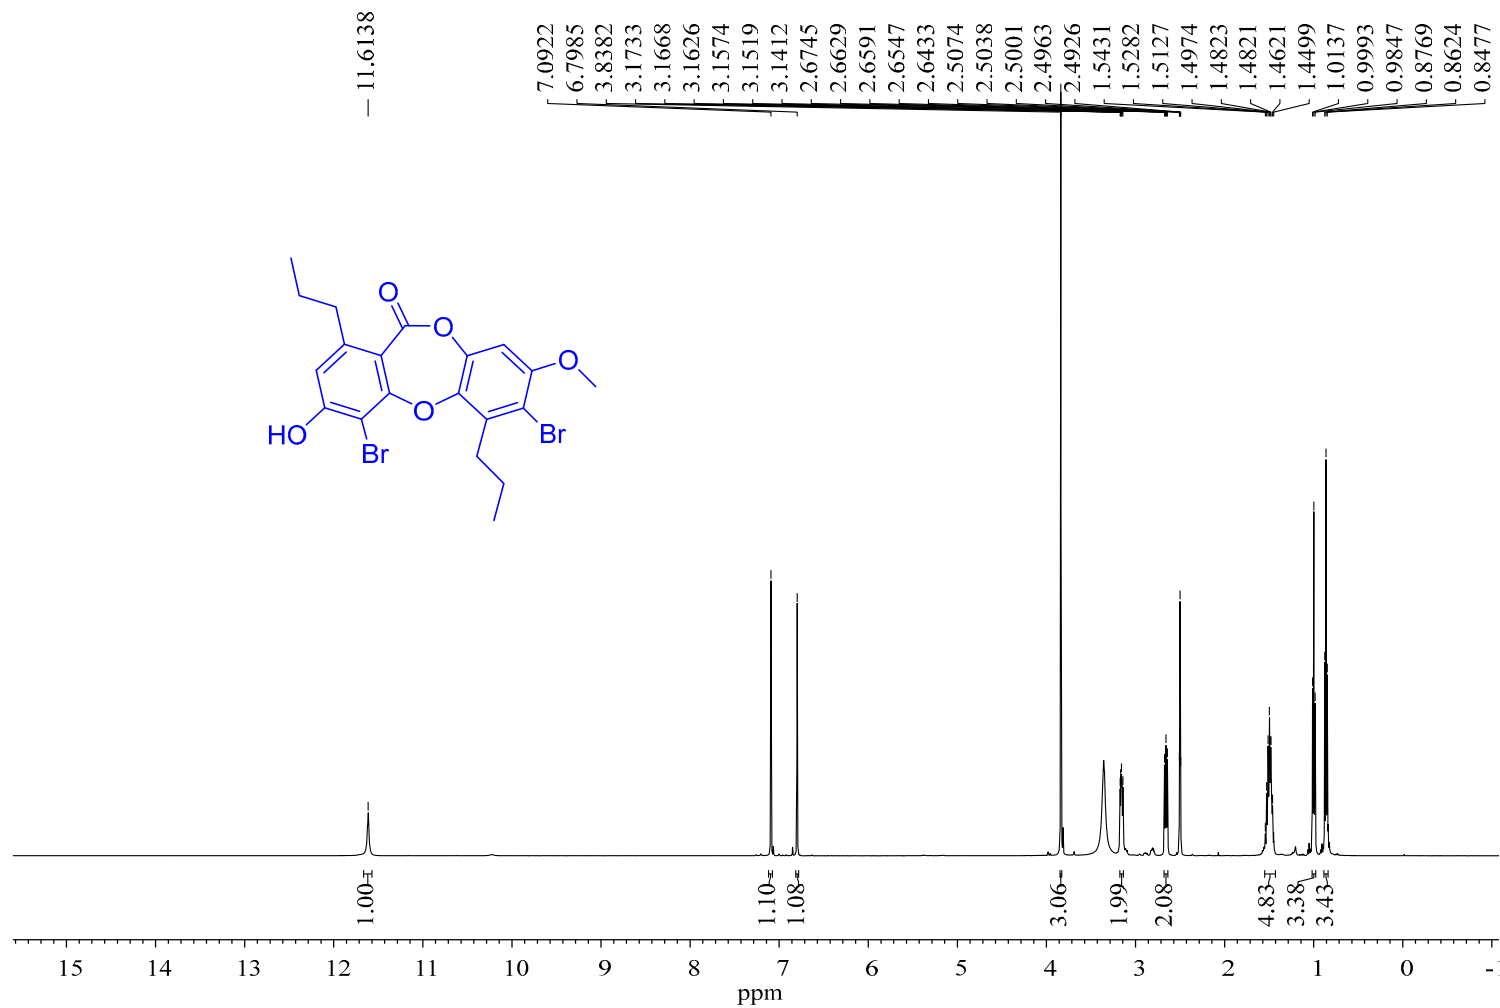

**Figure S121.**  $^1\text{H}$ -NMR spectrum of **16** in DMSO- $d_6$  (500 MHz)

Fr.M-2 C

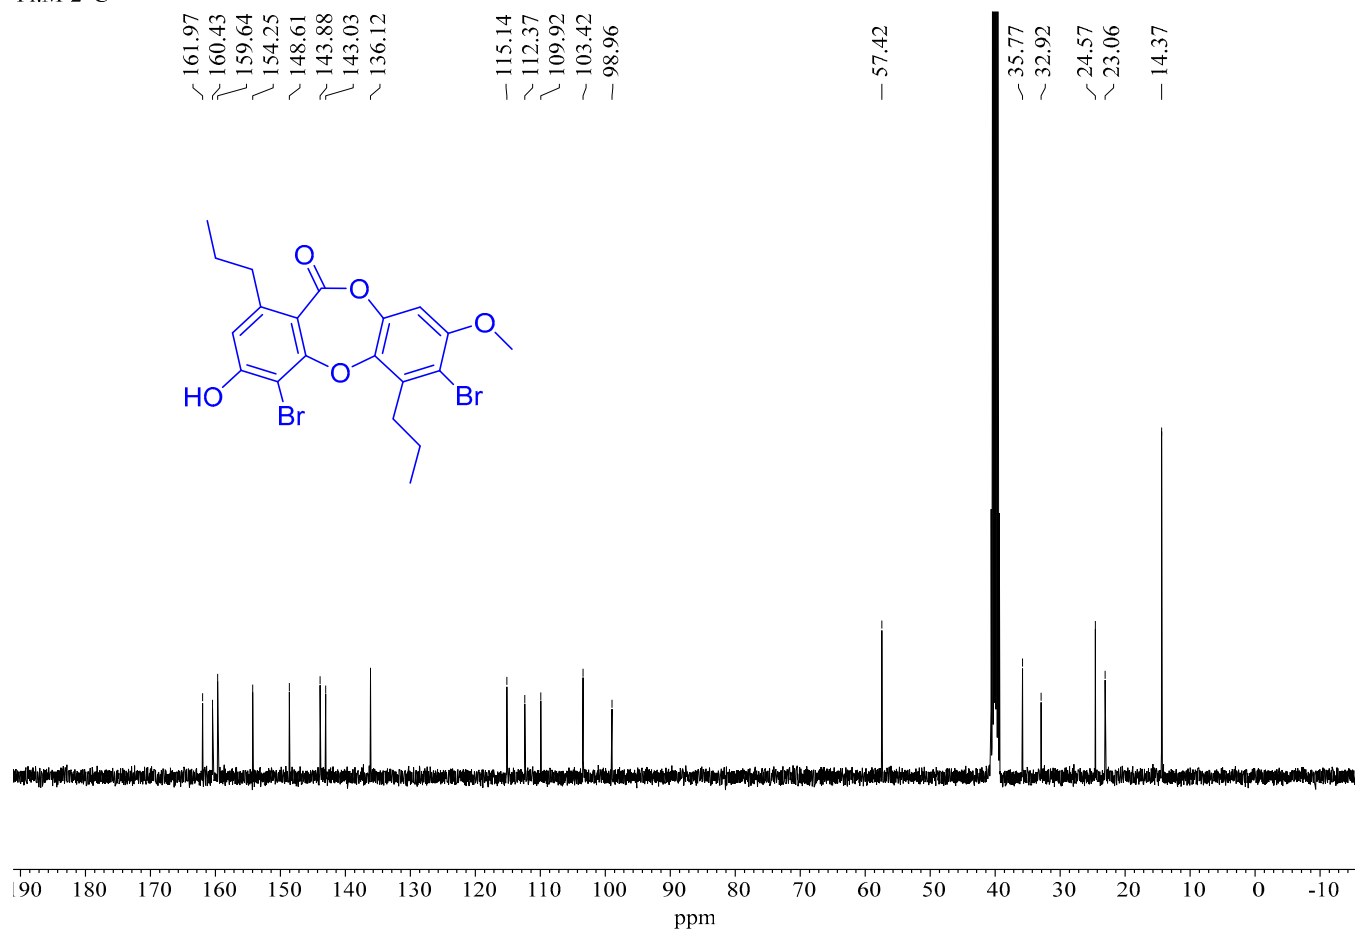

**Figure S122.** <sup>13</sup>C-NMR spectrum of **16** in DMSO-*d*<sub>6</sub> (125 MHz)

Fr.M-2 HSQC

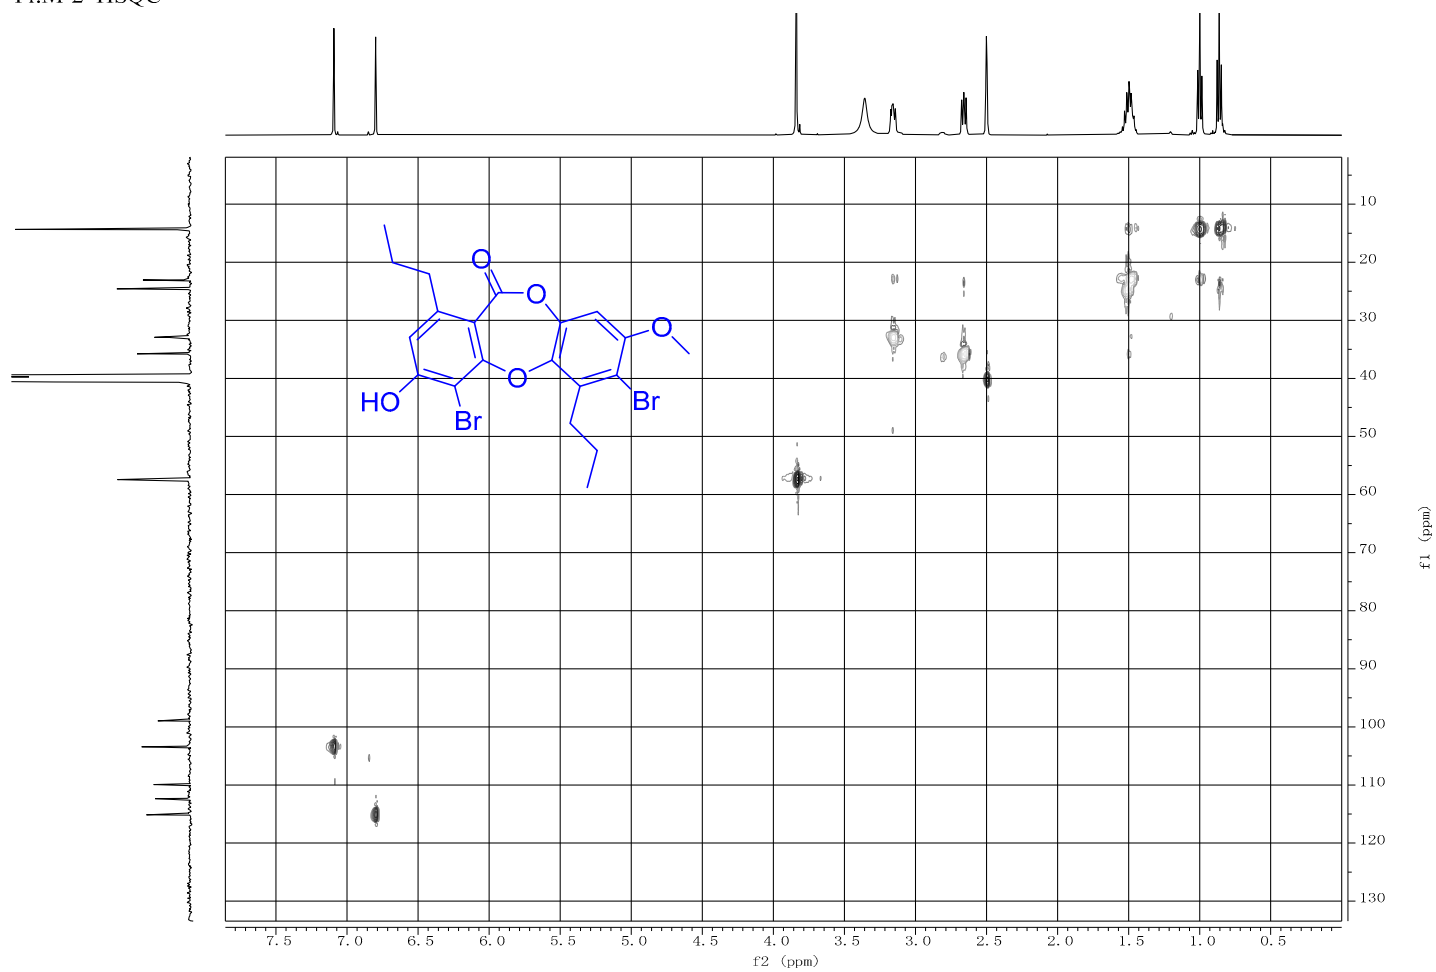

**Figure S123.** HSQC spectrum of **16** in DMSO-*d*<sub>6</sub>

Fr.M-2 COSY

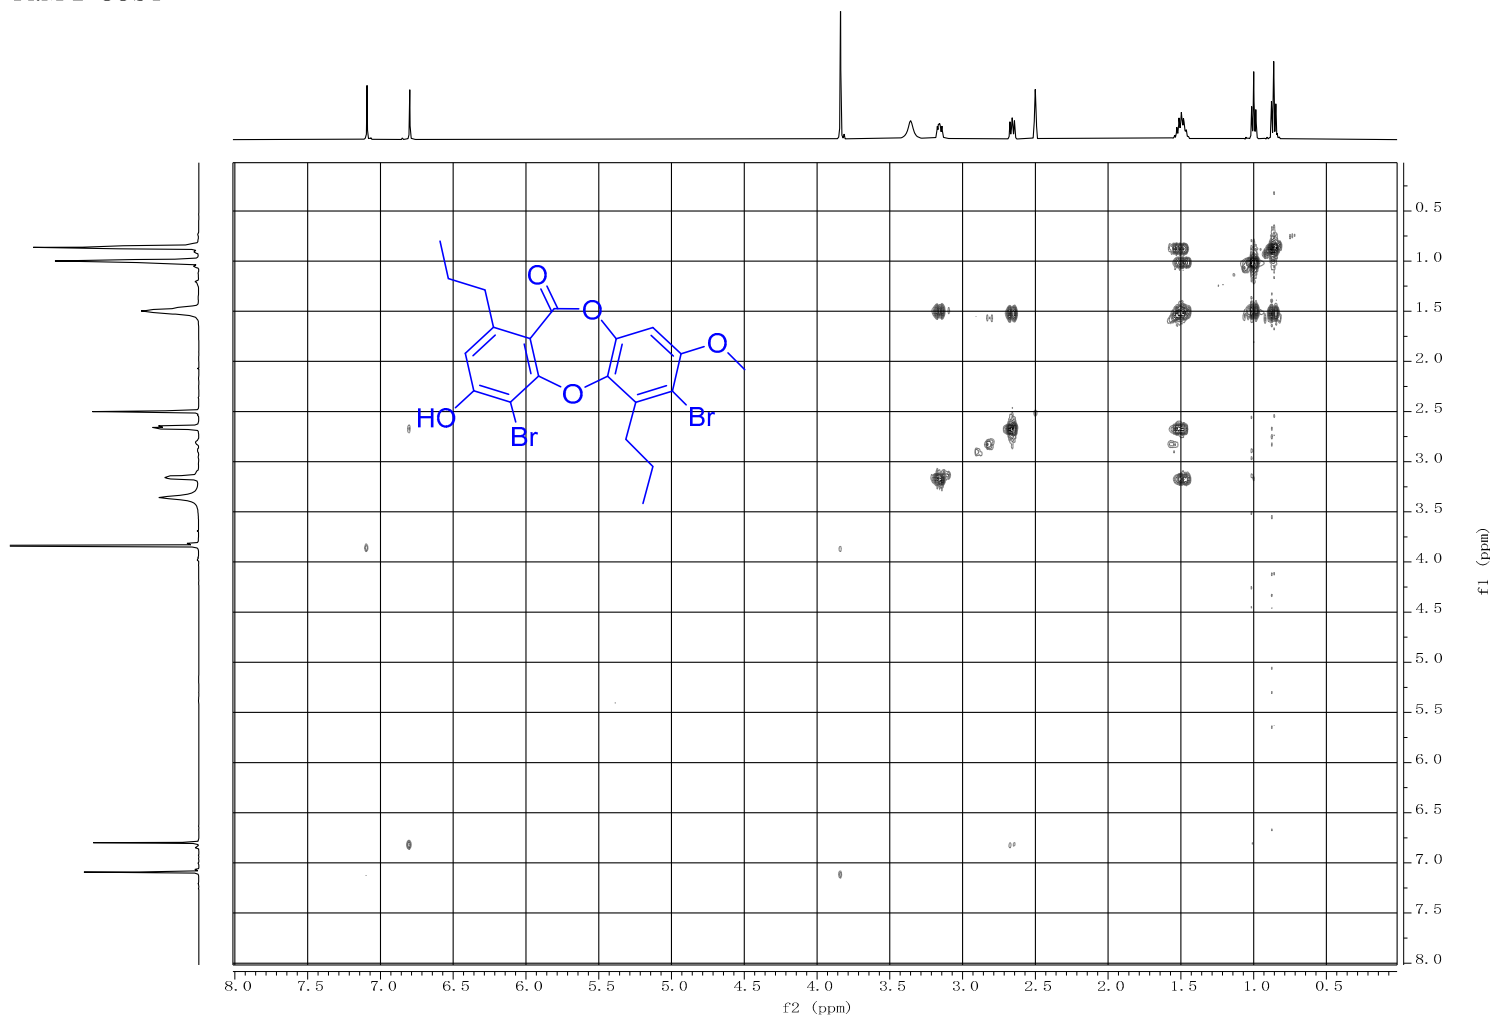

**Figure S124.**  $^1\text{H}$ - $^1\text{H}$  COSY spectrum of **16** in  $\text{DMSO}-d_6$



Fr.M-2 HMBC

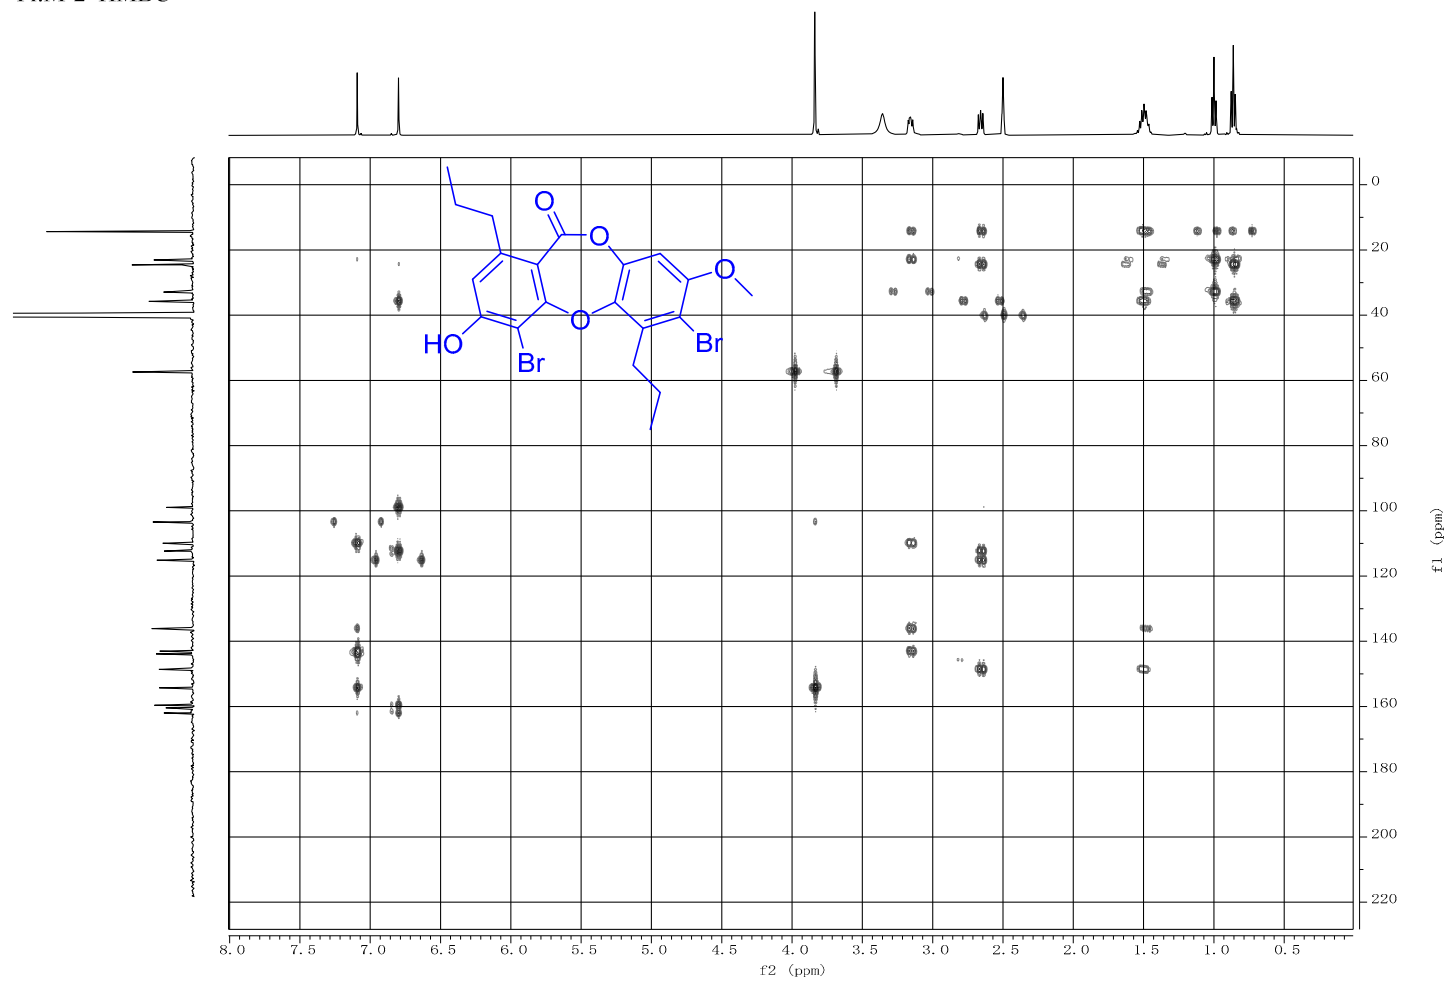

**Figure S125.** HMBC spectrum of **16** in DMSO-*d*<sub>6</sub>

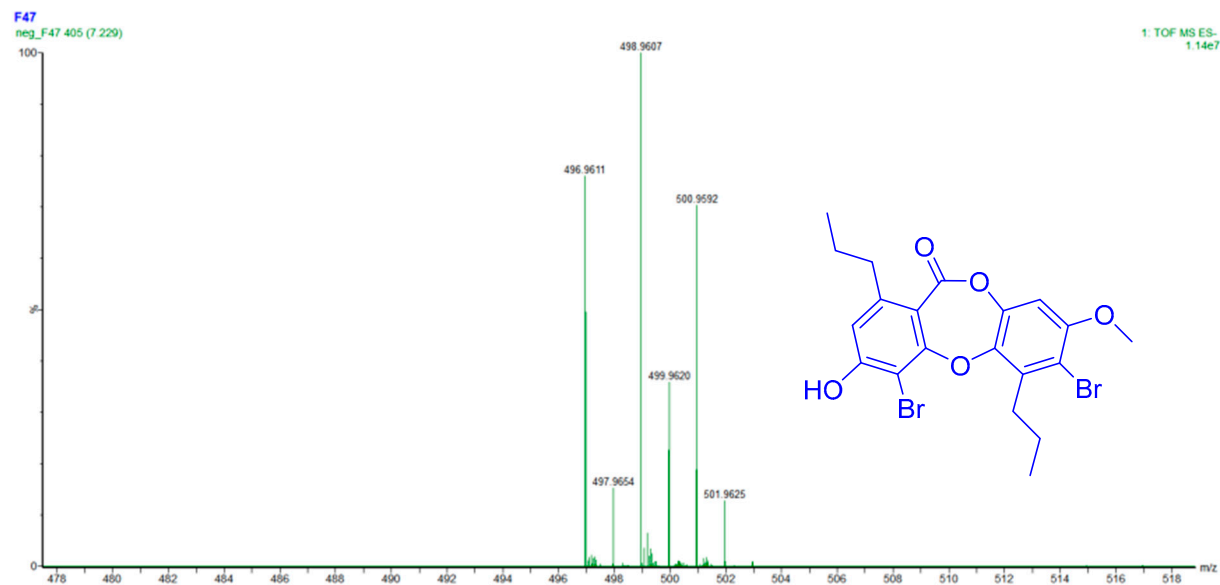

### Single Mass Analysis

Tolerance = 5.0 mDa / DBE: min = -1.5, max = 50.0

Element prediction: Off

Monoisotopic Mass, Even Electron Ions

351 formula(e) evaluated with 8 results within limits (up to 50 closest results for each mass)

Elements Used:

C: 0-500

H: 0-1000

O: 0-200

Br: 0-8

| Mass     | Calc. Mass | mDa  | PPM  | DBE  | Formula         | C  | H  | O  | Br |
|----------|------------|------|------|------|-----------------|----|----|----|----|
| 496.9611 | 496.9658   | -4.7 | -9.5 | 1.5  | C13 H23 O10 Br2 | 13 | 23 | 10 | 2  |
|          | 496.9599   | 1.2  | 2.4  | 10.5 | C20 H19 O5 Br2  | 20 | 19 | 5  | 2  |

**Figure S126.** HRESIMS spectrum of **16**

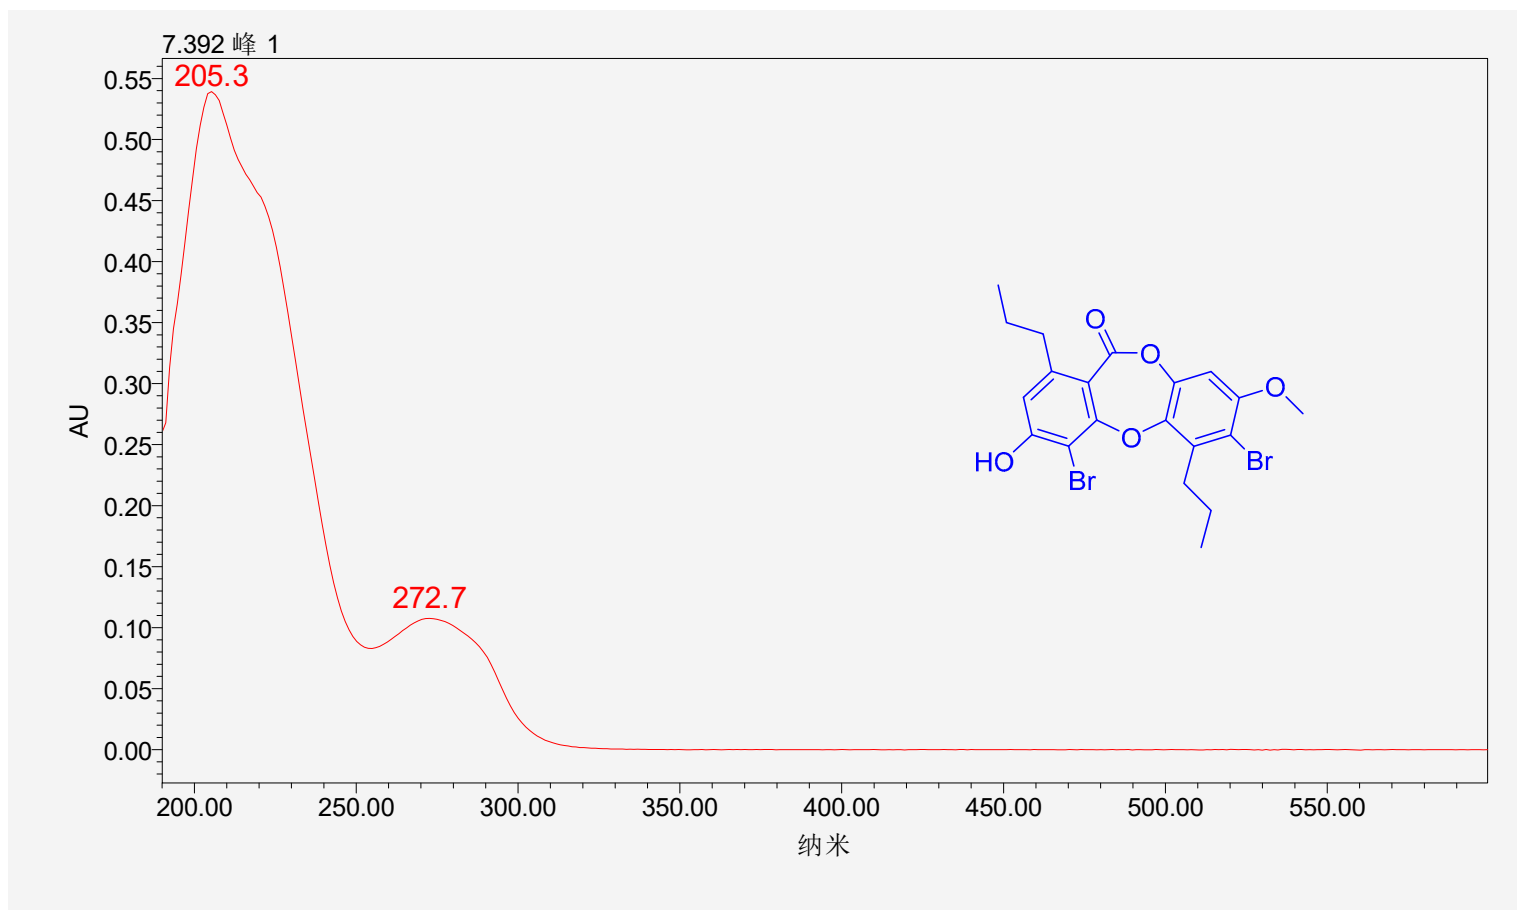

**Figure S127.** UV spectrum of **16**

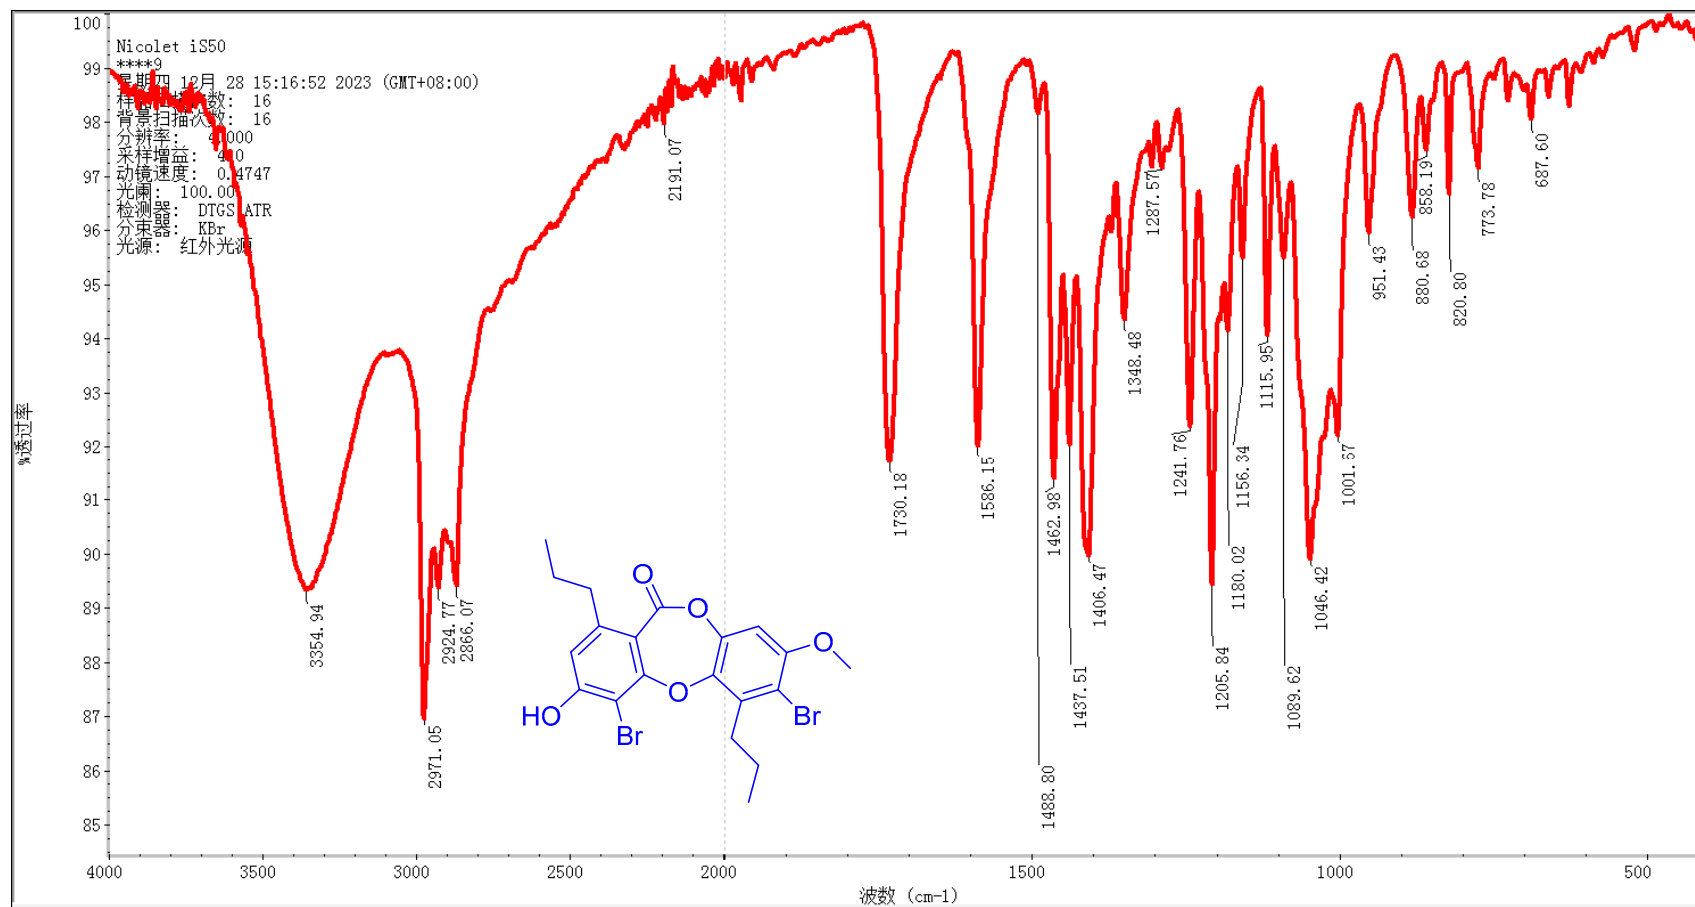

Figure S128. IR spectrum of 16

**Table S12.** Comparison of the <sup>1</sup>H NMR data of **12-16** to spiromastixones P-T ( $\delta_{\text{H}}$  ppm, *J* in Hz)

| Position | <b>12</b> <sup>a,d</sup> | <b>P</b> <sup>b,e</sup> | <b>13</b> <sup>a,d</sup> | <b>Q</b> <sup>a,e</sup> | <b>14</b> <sup>a,d</sup> | <b>R</b> <sup>b,e</sup> | <b>15</b> <sup>a,d</sup> | <b>S</b> <sup>a,f</sup> | <b>16</b> <sup>a,d</sup> | <b>T</b> <sup>a,e</sup> |
|----------|--------------------------|-------------------------|--------------------------|-------------------------|--------------------------|-------------------------|--------------------------|-------------------------|--------------------------|-------------------------|
| 3        | 6.60, d (2.3)            | 6.73, d (2.0)           | 6.59, d (2.3)            | 6.72, d (2.0)           | -                        | -                       | -                        | -                       | -                        | -                       |
| 5        | 6.62, d (2.3)            | 6.72, d (2.0)           | 6.62, d (2.3)            | 6.71, d (2.0)           | 6.77, s                  | 6.90, s                 | -                        | -                       | 6.80, s                  | 6.93, s                 |
| 8        | 2.68, t (7.9)            | 2.76, t (7.8)           | 2.69, m                  | 2.79, t (7.8)           | 2.65, t (7.8)            | 2.73, t (9.8)           | 2.68, t (7.9)            | 2.90, t (7.8)           | 2.66, t (7.9)            | 2.74, t (7.8)           |
| 9        | 1.48, m                  | 1.57, m                 | 1.47, m                  | 1.57, m                 | 1.48, m                  | 1.57, m                 | 1.55, m                  | 1.64, m                 | 1.50, m                  | 1.58, m                 |
| 10       | 0.85, t (7.3)            | 0.89, t (7.5)           | 0.82, t (7.3)            | 0.88, t (7.5)           | 0.84, t (7.4)            | 0.88, t (7.3)           | 0.85, t (7.4)            | 0.93, t (7.5)           | 0.86, t (7.4)            | 0.89, t (7.5)           |
| 3'       | 6.73, s                  | 6.81, s                 | -                        | -                       | 6.52, d (2.9)            | 6.57, d (3.0)           | 6.42, d (2.9)            | 6.49, d (2.5)           | 7.09, s                  | 6.94, s                 |
| 5'       | -                        | -                       | 6.66, s                  | 6.79, s                 | 6.47, d (2.9)            | 6.58, d (3.0)           | 6.40, d (2.9)            | 6.48, d (2.5)           | -                        | -                       |
| 6'       | -                        | -                       | -                        | -                       | -                        | -                       | -                        | 2.94, t (7.8)           | -                        | -                       |
| 7'       | 2.88, t (8.1)            | 2.99, t (8.0)           | 2.67, m                  | 2.75, t (7.8)           | 2.88, t (7.9)            | 2.98, t (9.8)           | 2.83, t (7.9)            | 2.94, t (7.8)           | 3.16, t (8.1)            | 3.28, t (8.0)           |
| 8'       | 1.54, m                  | 1.66, m                 | 1.55, m                  | 1.66, m                 | 1.55, m                  | 1.66, m                 | 1.52, m                  | 1.66, m                 | 1.48, m                  | 1.61, m                 |
| 9'       | 1.04, t (7.4)            | 1.09, t (7.5)           | 0.97, t (7.4)            | 1.01, t (7.5)           | 0.94, t (7.4)            | 1.08, t (7.3)           | 0.92, t (7.4)            | 1.00, t (7.5)           | 1.00, t (7.3)            | 1.07, t (7.5)           |
| OMe      | -                        | -                       | -                        | -                       | -                        | -                       | -                        | -                       | 3.84, s                  | 3.92, s                 |

<sup>a</sup>500 MHz; <sup>b</sup>400 MHz; <sup>c</sup>600 MHz; <sup>d</sup>Recorded in DMSO-*d*<sub>6</sub>; <sup>e</sup>Recorded in acetone-*d*<sub>6</sub>; <sup>f</sup>Recorded in methanol-*d*<sub>4</sub> P: spiromastixone P, Q: spiromastixone Q, R: spiromastixone R, S: spiromastixone S, T: spiromastixone T. The NMR data of known analogues are cited from the literature (Guo, Z.; Zhu, W.; Zhao, L.; Chen, Y.; Li, S.; Cheng, P.; Ge, H.; Tan, R.; Jiao, R. New antibacterial depsidones from an ant-derived fungus *Spiromastix* sp. MY-1, Chin. J. Nat. Med. 2022, 20, 627-632).

P

**Table S13.** Comparison of the  $^{13}\text{C}$  NMR data of **12-16** to spiromastixones P-T ( $\delta_{\text{C}}$  ppm)

| Position | <b>12</b> <sup>a,d</sup> | <b>P</b> <sup>b,e</sup> | <b>13</b> <sup>a,d</sup> | <b>Q</b> <sup>a,e</sup> | <b>14</b> <sup>a,d</sup> | <b>R</b> <sup>b,e</sup> | <b>15</b> <sup>a,d</sup> | <b>S</b> <sup>a,f</sup> | <b>16</b> <sup>a,d</sup> | <b>T</b> <sup>a,e</sup> |
|----------|--------------------------|-------------------------|--------------------------|-------------------------|--------------------------|-------------------------|--------------------------|-------------------------|--------------------------|-------------------------|
| 1        | 111.4, C                 | 113.1, C                | 111.2, C                 | 113.1, C                | 112.9, C                 | 114.8, C                | 100.0, C                 | 116.7, C                | 112.4, C                 | 114.0, C                |
| 2        | 162.7, C                 | 162.8, C                | 162.6, C                 | 162.7, C                | 160.6, C                 | 159.4, C                | 160.6, C                 | 156.9, C                | 160.5, C                 | 159.9, C                |
| 3        | 105.1, CH                | 105.7, CH               | 105.1, CH                | 105.8, CH               | 98.9, C                  | 99.4, C                 | 101.7, C                 | 101.1, C                | 98.9, C                  | 99.4, C                 |
| 4        | 162.6, C                 | 163.1, C                | 162.3, C                 | 163.1, C                | 159.5, C                 | 161.5, C                | 160.6, C                 | 160.8, C                | 159.6, C                 | 161.4, C                |
| 5        | 115.6, CH                | 116.1, CH               | 115.7, CH                | 116.2, CH               | 114.9, CH                | 115.5, CH               | 117.6, C                 | 112.2, C                | 115.2, CH                | 115.8, CH               |
| 6        | 149.7, C                 | 150.7, C                | 149.5, C                 | 150.4, C                | 147.9, C                 | 149.0, C                | 144.4, C                 | 147.2, C                | 148.6, C                 | 149.6, C                |
| 7        | 163.2, C                 | 164.3, C                | 163.4, C                 | 164.3, C                | 162.7, C                 | 163.1, C                | 163.5, C                 | 164.1, C                | 161.9, C                 | 162.4, C                |
| 8        | 35.5, CH <sub>2</sub>    | 36.4, CH <sub>2</sub>   | 35.3, CH <sub>2</sub>    | 36.3, CH <sub>2</sub>   | 36.6, CH <sub>2</sub>    | 36.5, CH <sub>2</sub>   | 37.2, CH <sub>2</sub>    | 37.4, CH <sub>2</sub>   | 35.8, CH <sub>2</sub>    | 36.6, CH <sub>2</sub>   |
| 9        | 24.7, CH <sub>2</sub>    | 25.4, CH <sub>2</sub>   | 24.7, CH <sub>2</sub>    | 25.4, CH <sub>2</sub>   | 24.6, CH <sub>2</sub>    | 25.3, CH <sub>2</sub>   | 22.9, CH <sub>2</sub>    | 24.1, CH <sub>2</sub>   | 24.6, CH <sub>2</sub>    | 25.3, CH <sub>2</sub>   |
| 10       | 14.3, CH <sub>3</sub>    | 14.3, CH <sub>3</sub>   | 14.2, CH <sub>3</sub>    | 14.3, CH <sub>3</sub>   | 14.3, CH <sub>3</sub>    | 14.4, CH <sub>3</sub>   | 14.6, CH <sub>3</sub>    | 14.2, CH <sub>3</sub>   | 14.4, CH <sub>3</sub>    | 14.3, CH <sub>3</sub>   |
| 1'       | 141.6, C                 | 143.1, C                | 142.4, C                 | 143.8, C                | 141.9, C                 | 143.3, C                | 142.3, C                 | 143.5, C                | 143.0, C                 | 144.1, C                |
| 2'       | 143.7, C                 | 145.1, C                | 142.9, C                 | 144.1, C                | 144.5, C                 | 145.6, C                | 145.7, C                 | 145.7, C                | 143.9, C                 | 144.9, C                |
| 3'       | 105.5, CH                | 106.2, CH               | 99.2, C                  | 99.8, C                 | 105.5, CH                | 106.0, CH               | 105.2, CH                | 106.0, CH               | 103.9, CH                | 103.4, CH               |
| 4'       | 152.4, C                 | 152.8, C                | 152.6, C                 | 153.0, C                | 155.4, C                 | 155.9, C                | 154.9, C                 | 156.6, C                | 154.3, C                 | 155.3, C                |
| 5'       | 108.3, C                 | 108.7, C                | 112.7, CH                | 113.3, CH               | 113.8, CH                | 114.2, CH               | 113.1, C                 | 114.7, C                | 110.2, C                 | 110.7, C                |
| 6'       | 135.7, C                 | 136.7, C                | 134.3, C                 | 135.4, C                | 136.3, C                 | 137.4, C                | 135.9, C                 | 137.7, C                | 136.1, C                 | 137.4, C                |
| 7'       | 32.4, CH <sub>2</sub>    | 33.1, CH <sub>2</sub>   | 31.2, CH <sub>2</sub>    | 32.2, CH <sub>2</sub>   | 32.8, CH <sub>2</sub>    | 33.8, CH <sub>2</sub>   | 32.9, CH <sub>2</sub>    | 34.2, CH <sub>2</sub>   | 32.9, CH <sub>2</sub>    | 33.8, CH <sub>2</sub>   |
| 8'       | 22.7, CH <sub>2</sub>    | 23.4, CH <sub>2</sub>   | 23.6, CH <sub>2</sub>    | 24.2, CH <sub>2</sub>   | 24.4, CH <sub>2</sub>    | 25.0, CH <sub>2</sub>   | 24.6, CH <sub>2</sub>    | 25.4, CH <sub>2</sub>   | 23.1, CH <sub>2</sub>    | 23.7, CH <sub>2</sub>   |
| 9'       | 14.5, CH <sub>3</sub>    | 14.4, CH <sub>3</sub>   | 14.3, CH <sub>3</sub>    | 14.2, CH <sub>3</sub>   | 14.2, CH <sub>3</sub>    | 14.3, CH <sub>3</sub>   | 14.3, CH <sub>3</sub>    | 14.2, CH <sub>3</sub>   | 14.4, CH <sub>3</sub>    | 14.2, CH <sub>3</sub>   |
| OMe      | -                        | -                       | -                        | -                       | -                        | -                       | -                        | -                       | 57.4, CH <sub>3</sub>    | 57.3, CH <sub>3</sub>   |

<sup>a</sup>500 MHz; <sup>b</sup>400 MHz; <sup>c</sup>600 MHz; <sup>d</sup>Recorded in DMSO-*d*<sub>6</sub>; <sup>e</sup>Recorded in acetone-*d*<sub>6</sub>; <sup>f</sup>Recorded in methanol-*d*<sub>4</sub>. P: spiromastixone P, Q: spiromastixone Q, R: spiromastixone R, S: spiromastixone S, T: spiromastixone T. The NMR data of known analogues are cited from the literature (Guo, Z.; Zhu, W.; Zhao, L.; Chen, Y.; Li, S.; Cheng, P.; Ge, H.; Tan, R.; Jiao, R. New antibacterial depsidones from an ant-derived fungus *Spiromastix* sp. MY-1, Chin. J. Nat. Med. 2022, 20, 627-632).
